# Supplementary material for: Protein Corona Attenuates the Targeting of Antitumor Sialyl Lewis X-Decorated Liposomes to Vascular Endothelial Cells under Flow Conditions
Source: Pharmaceutics. 2023 Jun 16;15(6):1754. doi: 10.3390/pharmaceutics15061754 (PMC10303272; doi:10.3390/pharmaceutics15061754)
Supplement: Supplementary file 1 [file pharmaceutics-15-01754-s001.zip › Supplementary Table S1.xlsx]

## Sheet: iBAQ_raw
iBAQ 01	iBAQ 01_211116203409	iBAQ 01_211116221134	iBAQ 02	iBAQ 02_211117012617	iBAQ 02_211117030340	iBAQ 02_211117044104	iBAQ 18	iBAQ 18_211120085806	iBAQ 18_211120103530	iBAQ 19	iBAQ 19_211120135014	iBAQ 19_211120152736	iBAQ 20	iBAQ 20_211120184218	iBAQ 20_211120201940	iBAQ 21	iBAQ 21_211120233422	iBAQ 21_211121011144	iBAQ 22	iBAQ 22_211121042626	iBAQ 22_211121060351	iBAQ 23	iBAQ 23_211121091844	iBAQ 23_211121105620	Only identified by site	Reverse	Potential contaminant	GOBP name	GOMF name	GOCC name	KEGG name	Keywords	GOBP	GOMF	GOCC	Peptides	Razor + unique peptides	Unique peptides	Sequence coverage [%]	Unique + razor sequence coverage [%]	Unique sequence coverage [%]	Mol. weight [kDa]	Q-value	Score	Intensity	iBAQ peptides	MS/MS count	stddev HP	stddev EPC
#!{Type}E	E	E	E	E	E	E	E	E	E	E	E	E	E	E	E	E	E	E	E	E	E	E	E	E	C	C	C	C	C	C	C	C	C	C	C	N	N	N	N	N	N	N	N	N	N	N	N	N	N
#!{C:New grouping}HP	HP	HP	HP	HP	HP	HP	MLPH	MLPH	MLPH	MLPH	MLPH	MLPH	5SX	5SX	5SX	5SX	5SX	5SX	10SX	10SX	10SX	10SX	10SX	10SX
3022700	3047100	6228100	14002000	20085000	10782000	14358000	9474400	11062000	18873000	9843400	18607000	24681000	23832000	19137000	22053000	26793000	19418000	25945000	9734900	7676700	9790800	11221000	13011000	12148000				acute inflammatory response;acute-phase response;biological regulation;blood coagulation;cell activation;cellular process;coagulation;defense response;establishment of localization;establishment of localization in cell;exocytosis;hemostasis;inflammatory response;multicellular organismal process;negative regulation of catalytic activity;negative regulation of endopeptidase activity;negative regula…	binding;endopeptidase inhibitor activity;endopeptidase regulator activity;enzyme binding;enzyme inhibitor activity;enzyme regulator activity;glycoprotein binding;identical protein binding;peptidase inhibitor activity;peptidase regulator activity;protease binding;protein binding;serine-type endopeptidase inhibitor activity	cell part;cytoplasmic membrane-bounded vesicle lumen;cytoplasmic part;cytoplasmic vesicle part;endoplasmic reticulum;extracellular matrix;extracellular membrane-bounded organelle;extracellular organelle;extracellular region;extracellular region part;extracellular space;extracellular vesicular exosome;Golgi apparatus;intracellular membrane-bounded organelle;intracellular organelle;intracellular or…	Complement and coagulation cascades	3D-structure;Acutephase;Alternativesplicing;Bloodcoagulation;Completeproteome;Directproteinsequencing;Endoplasmicreticulum;Extracellularmatrix;Glycoprotein;Hemostasis;Phosphoprotein;Polymorphism;Proteaseinhibitor;Referenceproteome;Secreted;Serineproteaseinhibitor;Signal	GO:0001666;GO:0001775;GO:0002237;GO:0002526;GO:0002576;GO:0006810;GO:0006887;GO:0006950;GO:0006952;GO:0006953;GO:0006954;GO:0007596;GO:0007599;GO:0009607;GO:0009611;GO:0009719;GO:0009725;GO:0009987;GO:0010033;GO:0010035;GO:0010038;GO:0010288;GO:0010466;GO:0010951;GO:0016192;GO:0019222;GO:0030168;GO:0032355;GO:0032496;GO:0032501;GO:0032940;GO:0033986;GO:0033993;GO:0034014;GO:0034097;GO:0042221;GO:…	GO:0001948;GO:0002020;GO:0004857;GO:0004866;GO:0004867;GO:0005488;GO:0005515;GO:0019899;GO:0030234;GO:0030414;GO:0042802;GO:0061134;GO:0061135	GO:0005576;GO:0005578;GO:0005615;GO:0005783;GO:0005794;GO:0031012;GO:0031093;GO:0031974;GO:0031982;GO:0031983;GO:0031988;GO:0034774;GO:0043226;GO:0043227;GO:0043229;GO:0043230;GO:0043231;GO:0043233;GO:0044421;GO:0044422;GO:0044424;GO:0044433;GO:0044444;GO:0044446;GO:0044464;GO:0060205;GO:0065010;GO:0070062	19	19	19	428	428	428	46708	0	22589	18887000000	23	203	6.43231e+06	7.33063e+06
15435000	13452000	12982000	29778000	0	31280000	45937000	13048000	14086000	13939000	12627000	17352000	15958000	9620700	3879500	3354500	4922100	6191900	10188000	10546000	10270000	9937800	8078100	7674600	13141000								Completeproteome;Proteomicsidentification;Referenceproteome				2	2	2	148	148	148	12814	0	1539	1722300000	4	34	1.52606e+07	4.46997e+06
6712100	6811700	11752000	16205000	153750	17306000	21159000	0	0	5966800	18293000	21663000	0	226780	4483300	3321400	13264000	9693100	12274000	10206000	8540700	8473500	9489600	4321200	10750000								Completeproteome;Proteomicsidentification;Referenceproteome				3	3	2	165	165	165	12441	0	1809	1147900000	4	29	7.33513e+06	5.62745e+06
3542100	0	3965700	259370	2337400	6900000	8414700	1427600	4950300	1870300	3708700	1245500	1530500	0	0	0	3650000	0	2696500	0	0	0	1495300	0	1992100				activation of immune response;biological regulation;cellular component organization;cellular component organization or biogenesis;cellular membrane organization;cellular process;complement activation;complement activation, classical pathway;defense response;endocytosis;establishment of localization;humoral immune response;immune effector process;immune response;immune system process;innate immune…	antigen binding;binding	blood microparticle;cell part;extracellular membrane-bounded organelle;extracellular organelle;extracellular region;extracellular region part;extracellular vesicular exosome;membrane;membrane-bounded organelle;membrane-bounded vesicle;organelle;plasma membrane;vesicle		3D-structure;Completeproteome;Directproteinsequencing;Disulfidebond;Immunoglobulindomain;ImmunoglobulinVregion;Proteomicsidentification;Referenceproteome	GO:0002252;GO:0002253;GO:0002376;GO:0002682;GO:0002684;GO:0006810;GO:0006897;GO:0006898;GO:0006950;GO:0006952;GO:0006955;GO:0006956;GO:0006958;GO:0006959;GO:0008152;GO:0009987;GO:0010324;GO:0016043;GO:0016044;GO:0016192;GO:0019538;GO:0043170;GO:0044238;GO:0045087;GO:0048518;GO:0048583;GO:0048584;GO:0050776;GO:0050778;GO:0050789;GO:0050896;GO:0051234;GO:0061024;GO:0065007;GO:0071840;GO:0072376	GO:0003823;GO:0005488	GO:0005576;GO:0005886;GO:0016020;GO:0031982;GO:0031988;GO:0043226;GO:0043227;GO:0043230;GO:0044421;GO:0044464;GO:0065010;GO:0070062;GO:0072562	3	3	3	33	33	33	12332	0	31594	352150000	5	14	3.16005e+06	1.51567e+06
26028000	26388000	19081000	35895000	53902000	51006000	62691000	29049000	31847000	18334000	64368000	29782000	22128000	22568000	20459000	21954000	22401000	27012000	15021000	21523000	22573000	22379000	31264000	29307000	32164000								Completeproteome;Proteomicsidentification;Referenceproteome				2	2	1	167	167	108	13079	0	176	3900600000	4	30	1.66366e+07	1.53516e+07
32061000	26086000	26185000	0	285760	0	0	0	0	0	514540	0	378080	0	0	0	0	0	0	0	0	0	0	0	0				activation of immune response;biological regulation;cellular component organization;cellular component organization or biogenesis;cellular membrane organization;cellular process;complement activation;complement activation, classical pathway;defense response;endocytosis;establishment of localization;humoral immune response;immune effector process;immune response;immune system process;innate immune…		cell part;extracellular region;membrane;plasma membrane		Completeproteome;Proteomicsidentification;Referenceproteome	GO:0002252;GO:0002253;GO:0002376;GO:0002682;GO:0002684;GO:0006810;GO:0006897;GO:0006898;GO:0006950;GO:0006952;GO:0006955;GO:0006956;GO:0006958;GO:0006959;GO:0008152;GO:0009987;GO:0010324;GO:0016043;GO:0016044;GO:0016192;GO:0019538;GO:0043170;GO:0044238;GO:0045087;GO:0048518;GO:0048583;GO:0048584;GO:0050776;GO:0050778;GO:0050789;GO:0050896;GO:0051234;GO:0061024;GO:0065007;GO:0071840;GO:0072376		GO:0005576;GO:0005886;GO:0016020;GO:0044464	2	1	0	167	108	0	13085	0	97167	1035300000	5	7	1.51176e+07	1.08755e+07
5734700	5789900	4008000	0	0	7496400	9165300	0	0	5663300	0	0	0	3235000	3271300	3358500	2567900	4736800	3752500	3816800	3415200	3439500	3845300	4917100	4248500								Completeproteome;Proteomicsidentification;Referenceproteome				2	1	1	188	94	94	12874	0	10249	791990000	7	17	3.52621e+06	2.41604e+06
27505	33638	24620	0	0	0	0	0	0	13139	0	0	0	94737	0	0	0	18420	0	16396	0	14860	0	15201	0				anatomical structure morphogenesis;antigen processing and presentation;antigen processing and presentation of exogenous antigen;antigen processing and presentation of exogenous peptide antigen;antigen processing and presentation of exogenous peptide antigen via MHC class II;antigen processing and presentation of peptide antigen;antigen processing and presentation of peptide antigen via MHC class …	binding;clathrin binding;clathrin light chain binding;double-stranded RNA binding;enzyme binding;kinase binding;molecular transducer activity;nucleic acid binding;protein binding;protein kinase binding;RNA binding;signal transducer activity;structural molecule activity	adherens junction;anchoring junction;cell junction;cell part;cell-substrate adherens junction;cell-substrate junction;clathrin coat;clathrin coat of coated pit;clathrin coat of trans-Golgi network vesicle;clathrin coated vesicle membrane;clathrin complex;clathrin vesicle coat;clathrin-coated endocytic vesicle membrane;clathrin-coated vesicle;coated pit;coated vesicle;coated vesicle membrane;cytop…	Bacterial invasion of epithelial cells;Endocrine and other factor-regulated calcium reabsorption;Endocytosis;Huntington's disease;Lysosome	3D-structure;Acetylation;Alternativesplicing;Coatedpit;Completeproteome;Cytoplasmicvesicle;Directproteinsequencing;Membrane;Phosphoprotein;Polymorphism;Proteomicsidentification;Referenceproteome;Repeat	GO:0000041;GO:0000280;GO:0001649;GO:0002376;GO:0002478;GO:0002495;GO:0002504;GO:0006810;GO:0006811;GO:0006812;GO:0006826;GO:0006886;GO:0006892;GO:0006897;GO:0006898;GO:0006996;GO:0007067;GO:0007165;GO:0008152;GO:0009653;GO:0009987;GO:0010324;GO:0010827;GO:0010828;GO:0015031;GO:0015682;GO:0016043;GO:0016044;GO:0016192;GO:0019882;GO:0019884;GO:0019886;GO:0022402;GO:0022403;GO:0030001;GO:0030154;GO:…	GO:0003676;GO:0003723;GO:0003725;GO:0004871;GO:0005198;GO:0005488;GO:0005515;GO:0019899;GO:0019900;GO:0019901;GO:0030276;GO:0032051;GO:0060089	GO:0000139;GO:0005737;GO:0005739;GO:0005802;GO:0005819;GO:0005829;GO:0005886;GO:0005905;GO:0005912;GO:0005924;GO:0005925;GO:0012506;GO:0016020;GO:0016023;GO:0030054;GO:0030055;GO:0030117;GO:0030118;GO:0030120;GO:0030125;GO:0030130;GO:0030132;GO:0030135;GO:0030136;GO:0030659;GO:0030662;GO:0030665;GO:0030666;GO:0030669;GO:0031090;GO:0031410;GO:0031982;GO:0031988;GO:0032588;GO:0032991;GO:0042470;GO:…	4	4	4	26	26	26	19206	0	3667	75906000	88	8	15510.4	61287.4
221840	188350	402060	0	0	0	0	0	0	0	0	0	0	22542	0	0	28761	0	0	121040	139280	142510	0	0	0				biological regulation;biosynthetic process;cellular biosynthetic process;cellular macromolecule biosynthetic process;cellular macromolecule metabolic process;cellular metabolic process;cellular nitrogen compound metabolic process;cellular process;cellular protein metabolic process;cellular response to chemical stimulus;cellular response to endogenous stimulus;cellular response to epidermal growth…	binding;catalytic activity;enzyme binding;GTP binding;GTPase activity;guanyl nucleotide binding;guanyl ribonucleotide binding;hydrolase activity;hydrolase activity, acting on acid anhydrides;hydrolase activity, acting on acid anhydrides, in phosphorus-containing anhydrides;kinase binding;nucleic acid binding;nucleoside-triphosphatase activity;nucleotide binding;protein binding;protein kinase bind…	cell body;cell cortex part;cell part;cell projection membrane;cell projection part;cortical actin cytoskeleton;cortical cytoskeleton;cytoplasm;cytoplasmic part;cytoskeletal part;cytoskeleton;cytosol;eukaryotic translation elongation factor 1 complex;extracellular membrane-bounded organelle;extracellular organelle;extracellular region part;extracellular space;extracellular vesicular exosome;intrac…	RNA transport	3D-structure;Acetylation;Alternativesplicing;Completeproteome;Cytoplasm;Directproteinsequencing;Elongationfactor;GTP-binding;Methylation;Nucleotide-binding;Nucleus;Phosphoprotein;Polymorphism;Proteinbiosynthesis;Proteomicsidentification;Referenceproteome;Transcription;Transcriptionregulation;Ublconjugation	GO:0006139;GO:0006351;GO:0006355;GO:0006412;GO:0006414;GO:0006807;GO:0008152;GO:0009058;GO:0009059;GO:0009719;GO:0009889;GO:0009893;GO:0009987;GO:0010033;GO:0010035;GO:0010467;GO:0010468;GO:0010556;GO:0010941;GO:0010942;GO:0016070;GO:0019216;GO:0019219;GO:0019220;GO:0019222;GO:0019538;GO:0031323;GO:0031326;GO:0032774;GO:0033674;GO:0034641;GO:0034645;GO:0042221;GO:0042325;GO:0042981;GO:0043065;GO:…	GO:0000049;GO:0000166;GO:0003676;GO:0003723;GO:0003746;GO:0003824;GO:0003924;GO:0005488;GO:0005515;GO:0005525;GO:0008135;GO:0016462;GO:0016787;GO:0016817;GO:0016818;GO:0017076;GO:0017111;GO:0019001;GO:0019899;GO:0019900;GO:0019901;GO:0032553;GO:0032555;GO:0032561;GO:0035639	GO:0005615;GO:0005634;GO:0005730;GO:0005737;GO:0005829;GO:0005853;GO:0005856;GO:0016020;GO:0030863;GO:0030864;GO:0031253;GO:0031256;GO:0031982;GO:0031988;GO:0032587;GO:0032991;GO:0043025;GO:0043226;GO:0043227;GO:0043228;GO:0043229;GO:0043230;GO:0043231;GO:0043232;GO:0043234;GO:0044297;GO:0044421;GO:0044422;GO:0044424;GO:0044425;GO:0044428;GO:0044430;GO:0044444;GO:0044446;GO:0044448;GO:0044459;GO:…	2	2	2	51	51	51	40853	0	12915	99891000	19	11	159212	296446
1690500	1592400	1985200	1560700	1327600	1456800	1523500	830620	668060	824110	1317400	995200	725690	565010	334190	326610	1044000	615130	697290	301780	519990	451540	872110	868060	676390						extracellular membrane-bounded organelle;extracellular organelle;extracellular region part;extracellular vesicular exosome;membrane-bounded organelle;membrane-bounded vesicle;organelle;vesicle		Completeproteome;Disulfidebond;Glycoprotein;Polymorphism;Proteomicsidentification;Referenceproteome;Repeat;Secreted;Signal			GO:0031982;GO:0031988;GO:0043226;GO:0043227;GO:0043230;GO:0044421;GO:0065010;GO:0070062	34	34	34	134	134	134	57201	0	2964	8130500000	163	293	207428	484935
330980	369530	273690	915360	133600	581340	631050	356100	0	0	14815000	414830	9875700	784920	219680	756220	749900	0	767100	0	495760	99775	29217	0	566850				activation of immune response;biological regulation;complement activation;complement activation, classical pathway;defense response;humoral immune response;immune effector process;immune response;immune system process;innate immune response;macromolecule metabolic process;metabolic process;positive regulation of biological process;positive regulation of immune response;positive regulation of immu…	binding;calcium ion binding;catalytic activity;cation binding;endopeptidase activity;hydrolase activity;identical protein binding;ion binding;metal ion binding;peptidase activity;peptidase activity, acting on L-amino acid peptides;protein binding;serine hydrolase activity;serine-type endopeptidase activity;serine-type peptidase activity	blood microparticle;extracellular membrane-bounded organelle;extracellular organelle;extracellular region;extracellular region part;extracellular vesicular exosome;membrane-bounded organelle;membrane-bounded vesicle;organelle;vesicle	Complement and coagulation cascades;Staphylococcus aureus infection;Systemic lupus erythematosus	3D-structure;Calcium;Complementpathway;Completeproteome;Directproteinsequencing;Disulfidebond;EGF-likedomain;Glycoprotein;Hydrolase;Hydroxylation;Immunity;Innateimmunity;Metal-binding;Polymorphism;Protease;Proteomicsidentification;Referenceproteome;Repeat;Serineprotease;Signal;Sushi	GO:0002252;GO:0002253;GO:0002376;GO:0002682;GO:0002684;GO:0006950;GO:0006952;GO:0006955;GO:0006956;GO:0006958;GO:0006959;GO:0008152;GO:0019538;GO:0043170;GO:0044238;GO:0045087;GO:0048518;GO:0048583;GO:0048584;GO:0050776;GO:0050778;GO:0050789;GO:0050896;GO:0065007;GO:0072376	GO:0003824;GO:0004175;GO:0004252;GO:0005488;GO:0005509;GO:0005515;GO:0008233;GO:0008236;GO:0016787;GO:0017171;GO:0042802;GO:0043167;GO:0043169;GO:0046872;GO:0070011	GO:0005576;GO:0031982;GO:0031988;GO:0043226;GO:0043227;GO:0043230;GO:0044421;GO:0065010;GO:0070062;GO:0072562	4	4	4	79	79	79	57519	0	24647	899940000	22	15	263748	266453
45214000	39714000	33299000	17257000	20753000	16070000	33148000	83490000	86240000	78856000	124910000	109520000	90857000	165150000	151260000	150020000	102570000	145330000	138670000	112830000	129570000	124030000	127130000	152840000	152080000				acute inflammatory response;acute-phase response;cell chemotaxis;cell migration;cell motility;cellular component movement;cellular process;cellular response to chemical stimulus;cellular response to stimulus;chemotaxis;defense response;inflammatory response;locomotion;positive chemotaxis;response to chemical stimulus;response to external stimulus;response to stimulus;response to stress;response t…	chemoattractant activity	extracellular membrane-bounded organelle;extracellular organelle;extracellular region;extracellular region part;extracellular space;extracellular vesicular exosome;high-density lipoprotein particle;macromolecular complex;membrane-bounded organelle;membrane-bounded vesicle;organelle;plasma lipoprotein particle;protein-lipid complex;vesicle		Acutephase;Completeproteome;Directproteinsequencing;Glycoprotein;HDL;Polymorphism;Referenceproteome;Secreted;Signal	GO:0002526;GO:0006928;GO:0006935;GO:0006950;GO:0006952;GO:0006953;GO:0006954;GO:0009605;GO:0009611;GO:0009987;GO:0016477;GO:0040011;GO:0042221;GO:0042330;GO:0048870;GO:0050896;GO:0050918;GO:0051716;GO:0060326;GO:0070887	GO:0042056	GO:0005576;GO:0005615;GO:0031982;GO:0031988;GO:0032991;GO:0032994;GO:0034358;GO:0034364;GO:0043226;GO:0043227;GO:0043230;GO:0044421;GO:0065010;GO:0070062	5	5	5	255	255	255	23353	0	4556	37791000000	12	225	1.14427e+07	1.05185e+07
25324	0	18541	48919	35112	75234	45653	115100	70852	61541	0	0	19507	29686	0	27178	12608	54757	0	0	38619	23485	0	0	0				biological regulation;blood circulation;blood coagulation;cell activation;cellular process;circulatory system process;coagulation;establishment of localization;establishment of localization in cell;exocytosis;hemostasis;multicellular organismal process;platelet activation;platelet degranulation;regulation of biological quality;regulation of body fluid levels;secretion;secretion by cell;system pro…	binding;catalytic activity;cation binding;copper ion binding;endopeptidase activity;hydrolase activity;ion binding;metal ion binding;peptidase activity;peptidase activity, acting on L-amino acid peptides;serine hydrolase activity;serine-type endopeptidase activity;serine-type peptidase activity;transition metal ion binding	cell part;cytoplasmic membrane-bounded vesicle lumen;cytoplasmic part;cytoplasmic vesicle part;endoplasmic reticulum;extracellular region;extracellular region part;extracellular space;Golgi apparatus;intracellular membrane-bounded organelle;intracellular organelle;intracellular organelle part;intracellular part;membrane;membrane-bounded organelle;membrane-enclosed lumen;organelle;organelle lumen;…	Complement and coagulation cascades	3D-structure;Bloodcoagulation;Calcium;Completeproteome;Copper;Diseasemutation;Disulfidebond;Glycoprotein;Hemostasis;Metal-binding;Phosphoprotein;Polymorphism;Proteomicsidentification;Referenceproteome;Repeat;Secreted;Signal;Sulfation;Thrombophilia;Zymogen	GO:0001775;GO:0002576;GO:0003008;GO:0003013;GO:0006810;GO:0006887;GO:0007596;GO:0007599;GO:0008015;GO:0009987;GO:0016192;GO:0030168;GO:0032501;GO:0032940;GO:0046903;GO:0050817;GO:0050878;GO:0051234;GO:0051649;GO:0065007;GO:0065008	GO:0003824;GO:0004175;GO:0004252;GO:0005488;GO:0005507;GO:0008233;GO:0008236;GO:0016787;GO:0017171;GO:0043167;GO:0043169;GO:0046872;GO:0046914;GO:0070011	GO:0005576;GO:0005615;GO:0005783;GO:0005794;GO:0005886;GO:0016020;GO:0031093;GO:0031974;GO:0031982;GO:0031983;GO:0034774;GO:0043226;GO:0043227;GO:0043229;GO:0043231;GO:0043233;GO:0044421;GO:0044422;GO:0044424;GO:0044433;GO:0044444;GO:0044446;GO:0044464;GO:0060205	3	3	3	13	13	13	2517	0	1716	120460000	87	4	24198.8	47301.4
28409000	23641000	26345000	0	0	0	0	0	316640	0	0	0	538190	22883000	0	17303000	370680	0	0	30525000	29105000	29103000	19212000	23406000	0				activation of immune response;biological regulation;cellular component organization;cellular component organization or biogenesis;cellular membrane organization;cellular process;complement activation;complement activation, classical pathway;defense response;endocytosis;establishment of localization;humoral immune response;immune effector process;immune response;immune system process;innate immune…	antigen binding;binding	blood microparticle;cell part;extracellular membrane-bounded organelle;extracellular organelle;extracellular region;extracellular region part;extracellular vesicular exosome;membrane;membrane-bounded organelle;membrane-bounded vesicle;organelle;plasma membrane;vesicle		3D-structure;Completeproteome;Disulfidebond;Immunoglobulindomain;ImmunoglobulinVregion;Referenceproteome;Signal	GO:0002252;GO:0002253;GO:0002376;GO:0002682;GO:0002684;GO:0006810;GO:0006897;GO:0006898;GO:0006950;GO:0006952;GO:0006955;GO:0006956;GO:0006958;GO:0006959;GO:0008152;GO:0009987;GO:0010324;GO:0016043;GO:0016044;GO:0016192;GO:0019538;GO:0043170;GO:0044238;GO:0045087;GO:0048518;GO:0048583;GO:0048584;GO:0050776;GO:0050778;GO:0050789;GO:0050896;GO:0051234;GO:0061024;GO:0065007;GO:0071840;GO:0072376	GO:0003823;GO:0005488	GO:0005576;GO:0005886;GO:0016020;GO:0031982;GO:0031988;GO:0043226;GO:0043227;GO:0043230;GO:0044421;GO:0044464;GO:0065010;GO:0070062;GO:0072562	2	2	2	261	261	261	12625	0	13789	1658700000	4	19	1.4036e+07	1.16142e+07
22681000	19447000	17559000	4116200	10756000	12226000	11955000	29566000	26958000	14184000	78375000	84045000	33194000	72515000	63767000	42358000	30028000	28658000	28768000	31009000	31663000	29598000	22209000	32235000	32161000				activation of immune response;biological regulation;complement activation;complement activation, classical pathway;defense response;humoral immune response;immune effector process;immune response;immune system process;innate immune response;macromolecule metabolic process;metabolic process;positive regulation of biological process;positive regulation of immune response;positive regulation of immu…	antigen binding;binding	blood microparticle;extracellular membrane-bounded organelle;extracellular organelle;extracellular region;extracellular region part;extracellular space;extracellular vesicular exosome;membrane-bounded organelle;membrane-bounded vesicle;organelle;vesicle		3D-structure;Chromosomalrearrangement;Completeproteome;Directproteinsequencing;Disulfidebond;Glycoprotein;ImmunoglobulinCregion;Immunoglobulindomain;Proteomicsidentification;Referenceproteome;Secreted	GO:0002252;GO:0002253;GO:0002376;GO:0002682;GO:0002684;GO:0006950;GO:0006952;GO:0006955;GO:0006956;GO:0006958;GO:0006959;GO:0008152;GO:0019538;GO:0043170;GO:0044238;GO:0045087;GO:0048518;GO:0048583;GO:0048584;GO:0050776;GO:0050778;GO:0050789;GO:0050896;GO:0065007;GO:0072376	GO:0003823;GO:0005488	GO:0005576;GO:0005615;GO:0031982;GO:0031988;GO:0043226;GO:0043227;GO:0043230;GO:0044421;GO:0065010;GO:0070062;GO:0072562	12	12	6	479	479	279	36105	0	19422	25972000000	15	178	6.23378e+06	1.67899e+07
2569400	1820200	3075100	269280	61512	0	1699100	1094800	1196500	0	0	2534400	0	1801300	838050	962240	775690	0	0	756250	141220	848230	824860	1279700	1380100								Completeproteome;Proteomicsidentification;Referenceproteome				4	3	2	336	261	168	13056	0	20444	254070000	7	11	1.2554e+06	876415
983970	808980	721790	0	0	0	88193	178630	161030	185580	0	0	438260	1093600	1853100	2662500	317730	1371100	1306800	573390	560650	0	603860	343250	386900				activation of immune response;anatomical structure development;biological regulation;complement activation;complement activation, classical pathway;defense response;developmental process;humoral immune response;immune effector process;immune response;immune system process;innate immune response;inner ear development;macromolecule metabolic process;metabolic process;positive regulation of biologic…		blood microparticle;collagen;complement component C1 complex;extracellular matrix part;extracellular membrane-bounded organelle;extracellular organelle;extracellular region;extracellular region part;extracellular vesicular exosome;macromolecular complex;membrane-bounded organelle;membrane-bounded vesicle;organelle;protein complex;vesicle	Chagas disease (American trypanosomiasis);Complement and coagulation cascades;Prion diseases;Staphylococcus aureus infection;Systemic lupus erythematosus	3D-structure;Collagen;Complementpathway;Completeproteome;Directproteinsequencing;Diseasemutation;Disulfidebond;Glycoprotein;Hydroxylation;Immunity;Innateimmunity;Polymorphism;Proteomicsidentification;Pyrrolidonecarboxylicacid;Referenceproteome;Repeat;Secreted;Signal	GO:0002252;GO:0002253;GO:0002376;GO:0002682;GO:0002684;GO:0006950;GO:0006952;GO:0006955;GO:0006956;GO:0006958;GO:0006959;GO:0008152;GO:0019538;GO:0032502;GO:0043170;GO:0044238;GO:0045087;GO:0048518;GO:0048583;GO:0048584;GO:0048839;GO:0048856;GO:0050776;GO:0050778;GO:0050789;GO:0050896;GO:0065007;GO:0072376		GO:0005576;GO:0005581;GO:0005602;GO:0031982;GO:0031988;GO:0032991;GO:0043226;GO:0043227;GO:0043230;GO:0043234;GO:0044420;GO:0044421;GO:0065010;GO:0070062;GO:0072562	4	4	4	202	202	202	2403	0	36276	596330000	11	21	444130	900931
1515100	1199200	1290100	180520	125270	547340	61074	413840	586890	306730	400240	431840	65322	548250	387470	383830	265610	93753	209890	636230	450410	176900	550410	428570	567540				adult behavior;adult locomotory behavior;associative learning;ATP hydrolysis coupled proton transport;behavior;biological regulation;calcium ion homeostasis;calcium-mediated signaling;cardiac muscle contraction;cation homeostasis;cation transport;cell surface receptor linked signaling pathway;cellular calcium ion homeostasis;cellular cation homeostasis;cellular chemical homeostasis;cellular dival…	active transmembrane transporter activity;adenyl nucleotide binding;adenyl ribonucleotide binding;ADP binding;alkali metal ion binding;ATP binding;ATPase activity;ATPase activity, coupled;ATPase activity, coupled to movement of substances;ATPase activity, coupled to transmembrane movement of ions;ATPase activity, coupled to transmembrane movement of ions, phosphorylative mechanism;ATPase activity…	apical plasma membrane;axon;basolateral plasma membrane;caveola;cell part;cell projection;cell projection part;cytoplasm;cytoplasmic membrane-bounded vesicle;cytoplasmic part;cytoplasmic vesicle;dendritic spine;dendritic spine head;dendritic spine neck;endoplasmic reticulum;endosome;extracellular membrane-bounded organelle;extracellular organelle;extracellular region part;extracellular vesicular …	Aldosterone-regulated sodium reabsorption;Bile secretion;Carbohydrate digestion and absorption;Cardiac muscle contraction;Endocrine and other factor-regulated calcium reabsorption;Gastric acid secretion;Mineral absorption;Pancreatic secretion;Protein digestion and absorption;Proximal tubule bicarbonate reclamation;Salivary secretion	Acetylation;Alternativesplicing;ATP-binding;Cellmembrane;Completeproteome;Deafness;Directproteinsequencing;Diseasemutation;Dystonia;Hydrolase;Iontransport;Magnesium;Membrane;Metal-binding;Nucleotide-binding;Parkinsonism;Phosphoprotein;Polymorphism;Potassium;Potassiumtransport;Proteomicsidentification;Referenceproteome;Sodium;Sodium/potassiumtransport;Sodiumtransport;Transmembrane;Transmembranehel…	GO:0001504;GO:0001505;GO:0002026;GO:0002028;GO:0002087;GO:0003008;GO:0003012;GO:0006810;GO:0006811;GO:0006812;GO:0006813;GO:0006814;GO:0006818;GO:0006836;GO:0006873;GO:0006874;GO:0006875;GO:0006883;GO:0006936;GO:0006937;GO:0006940;GO:0006941;GO:0006942;GO:0007165;GO:0007166;GO:0007215;GO:0007610;GO:0007611;GO:0007612;GO:0007613;GO:0007626;GO:0007632;GO:0008016;GO:0008217;GO:0008306;GO:0008344;GO:…	GO:0000166;GO:0003824;GO:0005215;GO:0005391;GO:0005488;GO:0005515;GO:0005524;GO:0008324;GO:0008556;GO:0015075;GO:0015077;GO:0015079;GO:0015081;GO:0015399;GO:0015405;GO:0015662;GO:0016462;GO:0016787;GO:0016788;GO:0016791;GO:0016817;GO:0016818;GO:0016820;GO:0016887;GO:0017076;GO:0017111;GO:0022804;GO:0022857;GO:0022890;GO:0022891;GO:0022892;GO:0030554;GO:0030955;GO:0031402;GO:0031420;GO:0032553;GO:…	GO:0005634;GO:0005737;GO:0005768;GO:0005783;GO:0005794;GO:0005886;GO:0005890;GO:0005901;GO:0016020;GO:0016021;GO:0016023;GO:0016323;GO:0016324;GO:0030315;GO:0030424;GO:0031224;GO:0031410;GO:0031982;GO:0031988;GO:0032991;GO:0042383;GO:0042470;GO:0042995;GO:0043005;GO:0043197;GO:0043209;GO:0043226;GO:0043227;GO:0043229;GO:0043230;GO:0043231;GO:0043234;GO:0044309;GO:0044326;GO:0044327;GO:0044421;GO:…	12	12	12	151	151	151	10828	0	81124	1909600000	43	92	618259	904676
15169000	19835000	19331000	9405700	11258000	8431500	8886700	4364100	3821100	4158100	17287000	9697700	4758200	7809500	7043800	3390500	4408900	6458500	23315000	9096100	3970100	8578600	16453000	20159000	22967000								Completeproteome;Referenceproteome				2	2	2	132	132	132	13481	0	13292	1553400000	4	36	4.91595e+06	9.29196e+06
866250	888830	666310	2749400	3305500	3309500	3314300	1116500	843360	1115300	3442200	2979800	1193900	399910	474250	566690	363850	901200	592970	616750	785670	753140	1229200	1137000	946140								Completeproteome;Proteomicsidentification;Referenceproteome				4	2	2	261	126	126	12926	0	22265	488290000	7	21	1.28024e+06	1.14166e+06
62102000	49393000	38794000	41285000	106350000	89504000	128890000	68727000	63949000	58810000	23694000	34318000	54683000	42414000	29753000	47287000	37845000	39639000	48362000	58134000	57562000	51884000	35639000	41550000	61238000								Completeproteome;Proteomicsidentification;Referenceproteome				4	4	2	376	376	188	12839	0	29092	12582000000	7	109	3.50148e+07	1.57809e+07
731720	866730	580330	0	0	1834300	0	0	0	0	0	0	0	0	0	0	0	0	0	0	395210	0	0	0	0								Completeproteome;Referenceproteome				2	1	1	186	93	93	13077	84034	65056	34410000	6	2	669252	187248
143800000	173790000	117900000	268170000	266610000	241710000	328860000	135630000	155260000	158340000	177490000	157880000	83782000	59825000	52559000	50554000	106210000	126350000	119270000	58412000	60319000	51872000	92126000	92290000	137700000				activation of immune response;biological regulation;cellular component organization;cellular component organization or biogenesis;cellular membrane organization;cellular process;complement activation;complement activation, classical pathway;defense response;endocytosis;establishment of localization;humoral immune response;immune effector process;immune response;immune system process;innate immune…	antigen binding;binding	blood microparticle;cell part;extracellular membrane-bounded organelle;extracellular organelle;extracellular region;extracellular region part;extracellular space;extracellular vesicular exosome;membrane;membrane-bounded organelle;membrane-bounded vesicle;organelle;plasma membrane;vesicle		3D-structure;Alternativesplicing;Bence-Jonesprotein;Completeproteome;Directproteinsequencing;Disulfidebond;ImmunoglobulinCregion;Immunoglobulindomain;Proteomicsidentification;Referenceproteome;Secreted;Signal	GO:0002252;GO:0002253;GO:0002376;GO:0002682;GO:0002684;GO:0006810;GO:0006897;GO:0006898;GO:0006950;GO:0006952;GO:0006955;GO:0006956;GO:0006958;GO:0006959;GO:0008152;GO:0009987;GO:0010324;GO:0016043;GO:0016044;GO:0016192;GO:0019538;GO:0043170;GO:0044238;GO:0045087;GO:0048518;GO:0048583;GO:0048584;GO:0050776;GO:0050778;GO:0050789;GO:0050896;GO:0051234;GO:0061024;GO:0065007;GO:0071840;GO:0072376	GO:0003823;GO:0005488	GO:0005576;GO:0005615;GO:0005886;GO:0016020;GO:0031982;GO:0031988;GO:0043226;GO:0043227;GO:0043230;GO:0044421;GO:0044464;GO:0065010;GO:0070062;GO:0072562	8	8	3	488	488	205	2315	0	32331	83372000000	11	292	7.65733e+07	4.85293e+07
73400	91559	85158	77296	29345	0	0	0	0	0	0	0	0	0	0	0	0	0	0	0	0	0	0	0	0				axon guidance;cell cycle phase;cell cycle process;cellular component assembly;cellular component assembly at cellular level;cellular component organization;cellular component organization at cellular level;cellular component organization or biogenesis;cellular component organization or biogenesis at cellular level;cellular macromolecular complex assembly;cellular macromolecular complex subunit or…	binding;catalytic activity;G-protein coupled receptor activity;GTP binding;GTPase activity;guanyl nucleotide binding;guanyl ribonucleotide binding;hydrolase activity;hydrolase activity, acting on acid anhydrides;hydrolase activity, acting on acid anhydrides, in phosphorus-containing anhydrides;molecular transducer activity;nucleoside-triphosphatase activity;nucleotide binding;peptide binding;puri…	axon;cell body;cell part;cell periphery;cell projection;cytoplasm;cytoskeletal part;dendrite;extracellular membrane-bounded organelle;extracellular organelle;extracellular region part;extracellular vesicular exosome;integral to membrane;intracellular membrane-bounded organelle;intracellular organelle;intracellular organelle part;intracellular part;intrinsic to membrane;macromolecular complex;memb…	Gap junction;Pathogenic Escherichia coli infection;Phagosome	Acetylation;Alternativesplicing;Completeproteome;Cytoplasm;Cytoskeleton;Directproteinsequencing;Diseasemutation;GTP-binding;Microtubule;Nucleotide-binding;Phosphoprotein;Proteomicsidentification;Referenceproteome	GO:0000280;GO:0006457;GO:0006458;GO:0006461;GO:0006935;GO:0006996;GO:0007017;GO:0007067;GO:0007411;GO:0008152;GO:0009605;GO:0009987;GO:0016043;GO:0019538;GO:0022402;GO:0022403;GO:0022607;GO:0034621;GO:0034622;GO:0040011;GO:0042221;GO:0042330;GO:0043170;GO:0043623;GO:0043933;GO:0044237;GO:0044238;GO:0044260;GO:0044267;GO:0048285;GO:0050896;GO:0051084;GO:0051258;GO:0065003;GO:0071822;GO:0071840;GO:…	GO:0000166;GO:0003824;GO:0003924;GO:0004871;GO:0004872;GO:0004888;GO:0004930;GO:0005198;GO:0005200;GO:0005488;GO:0005525;GO:0016462;GO:0016787;GO:0016817;GO:0016818;GO:0017076;GO:0017111;GO:0019001;GO:0032553;GO:0032555;GO:0032561;GO:0035639;GO:0038023;GO:0042277;GO:0060089	GO:0005634;GO:0005737;GO:0005874;GO:0016021;GO:0030424;GO:0030425;GO:0031224;GO:0031982;GO:0031988;GO:0032991;GO:0042995;GO:0043005;GO:0043025;GO:0043226;GO:0043227;GO:0043229;GO:0043230;GO:0043231;GO:0043234;GO:0044297;GO:0044421;GO:0044422;GO:0044424;GO:0044425;GO:0044430;GO:0044446;GO:0044464;GO:0065010;GO:0070062;GO:0071944	12	3	2	197	65	5	88381	0	37099	121700000	29	6	40158	51928.3
2112500	1572100	1409000	0	0	0	0	0	2155000	0	0	0	0	1130500	0	738420	0	0	0	0	0	0	0	0	0								Completeproteome;Proteomicsidentification;Referenceproteome				3	1	1	418	112	112	10657	85106	65471	45587000	5	3	932116	0
12683000	13399000	12586000	4806700	4921600	4938000	6336800	8107300	9855100	6416700	3487000	4288500	6057100	6458200	2373100	5203800	5722200	8385100	8310700	3446300	2845200	3103800	6883800	6854600	9053500								Completeproteome;Proteomicsidentification;Referenceproteome				3	3	3	342	342	342	12674	0	25763	1310800000	6	28	4.12314e+06	3.56644e+06
7663700	7678400	5295300	349420	4506600	3204400	21928000	11281000	11934000	7968400	8327300	3029700	5537700	6287600	4011200	4549500	5510300	0	5022100	4762000	5526700	3889700	7684100	5523500	6347400				activation of immune response;biological regulation;cellular component organization;cellular component organization or biogenesis;cellular membrane organization;cellular process;complement activation;complement activation, classical pathway;defense response;endocytosis;establishment of localization;humoral immune response;immune effector process;immune response;immune system process;innate immune…	antigen binding;binding	cell part;extracellular membrane-bounded organelle;extracellular organelle;extracellular region;extracellular region part;extracellular vesicular exosome;membrane;membrane-bounded organelle;membrane-bounded vesicle;organelle;plasma membrane;vesicle		3D-structure;Completeproteome;Directproteinsequencing;Disulfidebond;Glycoprotein;Immunoglobulindomain;ImmunoglobulinVregion;Pyrrolidonecarboxylicacid;Referenceproteome;Signal	GO:0002252;GO:0002253;GO:0002376;GO:0002682;GO:0002684;GO:0006810;GO:0006897;GO:0006898;GO:0006950;GO:0006952;GO:0006955;GO:0006956;GO:0006958;GO:0006959;GO:0008152;GO:0009987;GO:0010324;GO:0016043;GO:0016044;GO:0016192;GO:0019538;GO:0043170;GO:0044238;GO:0045087;GO:0048518;GO:0048583;GO:0048584;GO:0050776;GO:0050778;GO:0050789;GO:0050896;GO:0051234;GO:0061024;GO:0065007;GO:0071840;GO:0072376	GO:0003823;GO:0005488	GO:0005576;GO:0005886;GO:0016020;GO:0031982;GO:0031988;GO:0043226;GO:0043227;GO:0043230;GO:0044421;GO:0044464;GO:0065010;GO:0070062	2	2	2	214	214	214	13016	0	14303	881450000	4	38	6.96573e+06	3.93679e+06
2264800	1912900	109550	0	0	0	0	0	0	0	0	0	0	0	425570	0	0	0	0	0	0	0	0	0	0				activation of immune response;biological regulation;cellular component organization;cellular component organization or biogenesis;cellular membrane organization;cellular process;complement activation;complement activation, classical pathway;defense response;endocytosis;establishment of localization;humoral immune response;immune effector process;immune response;immune system process;innate immune…	antigen binding;binding	cell part;extracellular membrane-bounded organelle;extracellular organelle;extracellular region;extracellular region part;extracellular vesicular exosome;membrane;membrane-bounded organelle;membrane-bounded vesicle;organelle;plasma membrane;vesicle		3D-structure;Completeproteome;Directproteinsequencing;Disulfidebond;Immunoglobulindomain;ImmunoglobulinVregion;Pyrrolidonecarboxylicacid;Referenceproteome	GO:0002252;GO:0002253;GO:0002376;GO:0002682;GO:0002684;GO:0006810;GO:0006897;GO:0006898;GO:0006950;GO:0006952;GO:0006955;GO:0006956;GO:0006958;GO:0006959;GO:0008152;GO:0009987;GO:0010324;GO:0016043;GO:0016044;GO:0016192;GO:0019538;GO:0043170;GO:0044238;GO:0045087;GO:0048518;GO:0048583;GO:0048584;GO:0050776;GO:0050778;GO:0050789;GO:0050896;GO:0051234;GO:0061024;GO:0065007;GO:0071840;GO:0072376	GO:0003823;GO:0005488	GO:0005576;GO:0005886;GO:0016020;GO:0031982;GO:0031988;GO:0043226;GO:0043227;GO:0043230;GO:0044421;GO:0044464;GO:0065010;GO:0070062	3	1	0	224	129	0	12698	0	77217	50737000	6	5	1.01446e+06	758514
837930	926250	930730	1050400	1577200	1847500	2080500	0	360400	1361500	922440	817480	0	312800	0	1801900	1199300	1001200	1200200	1456700	795270	1007500	2079000	2459500	494670				activation of immune response;biological regulation;cellular component organization;cellular component organization or biogenesis;cellular membrane organization;cellular process;complement activation;complement activation, classical pathway;defense response;endocytosis;establishment of localization;humoral immune response;immune effector process;immune response;immune system process;innate immune…	antigen binding;binding	blood microparticle;cell part;extracellular membrane-bounded organelle;extracellular organelle;extracellular region;extracellular region part;extracellular vesicular exosome;membrane;membrane-bounded organelle;membrane-bounded vesicle;organelle;plasma membrane;vesicle		Bence-Jonesprotein;Completeproteome;Directproteinsequencing;Disulfidebond;Immunoglobulindomain;ImmunoglobulinVregion;Proteomicsidentification;Referenceproteome;Signal	GO:0002252;GO:0002253;GO:0002376;GO:0002682;GO:0002684;GO:0006810;GO:0006897;GO:0006898;GO:0006950;GO:0006952;GO:0006955;GO:0006956;GO:0006958;GO:0006959;GO:0008152;GO:0009987;GO:0010324;GO:0016043;GO:0016044;GO:0016192;GO:0019538;GO:0043170;GO:0044238;GO:0045087;GO:0048518;GO:0048583;GO:0048584;GO:0050776;GO:0050778;GO:0050789;GO:0050896;GO:0051234;GO:0061024;GO:0065007;GO:0071840;GO:0072376	GO:0003823;GO:0005488	GO:0005576;GO:0005886;GO:0016020;GO:0031982;GO:0031988;GO:0043226;GO:0043227;GO:0043230;GO:0044421;GO:0044464;GO:0065010;GO:0070062;GO:0072562	2	1	1	239	137	137	12697	0	14137	195210000	4	7	505701	1.0698e+06
0	0	1100800	236860	0	0	333750	0	0	0	1265800	0	0	0	267040	246540	0	0	0	2971700	1072900	0	0	0	0				biological regulation;biosynthetic process;cell surface receptor linked signaling pathway;cellular biosynthetic process;cellular macromolecule biosynthetic process;cellular macromolecule metabolic process;cellular metabolic process;cellular nitrogen compound metabolic process;cellular process;cellular response to stimulus;enzyme linked receptor protein signaling pathway;gene expression;macromolec…	adenyl nucleotide binding;adenyl ribonucleotide binding;ATP binding;binding;catalytic activity;cyclin-dependent protein kinase activity;kinase activity;nucleotide binding;phosphotransferase activity, alcohol group as acceptor;protein kinase activity;protein serine/threonine kinase activity;purine nucleotide binding;purine ribonucleoside triphosphate binding;purine ribonucleotide binding;ribonucle…	cell part;intracellular membrane-bounded organelle;intracellular organelle;intracellular organelle part;intracellular part;macromolecular complex;mediator complex;membrane-bounded organelle;nuclear part;nucleoplasm;nucleoplasm part;nucleus;organelle;organelle part;protein complex		3D-structure;Activator;Alternativesplicing;ATP-binding;Completeproteome;Kinase;Nucleotide-binding;Nucleus;Polymorphism;Referenceproteome;Repressor;Serine/threonine-proteinkinase;Transcription;Transcriptionregulation;Transferase	GO:0006139;GO:0006351;GO:0006352;GO:0006355;GO:0006357;GO:0006367;GO:0006807;GO:0007165;GO:0007166;GO:0007167;GO:0007178;GO:0007179;GO:0007219;GO:0008152;GO:0009058;GO:0009059;GO:0009889;GO:0009891;GO:0009893;GO:0009987;GO:0010467;GO:0010468;GO:0010556;GO:0010557;GO:0010604;GO:0010628;GO:0016070;GO:0019219;GO:0019222;GO:0031323;GO:0031325;GO:0031326;GO:0031328;GO:0032774;GO:0034641;GO:0034645;GO:…	GO:0000166;GO:0003824;GO:0004672;GO:0004674;GO:0004693;GO:0005488;GO:0005524;GO:0008353;GO:0016301;GO:0016740;GO:0016772;GO:0016773;GO:0017076;GO:0030554;GO:0032553;GO:0032555;GO:0032559;GO:0035639	GO:0005634;GO:0005654;GO:0016592;GO:0032991;GO:0043226;GO:0043227;GO:0043229;GO:0043231;GO:0043234;GO:0044422;GO:0044424;GO:0044428;GO:0044446;GO:0044451;GO:0044464	2	2	2	169	169	169	22223	0	10776	80118000	8	0	404179	354724
0	71772	0	0	54181	131510	0	134050	0	0	0	0	0	0	0	0	0	44453	0	0	0	0	0	0	44843				axon target recognition;biological adhesion;biological regulation;cell adhesion;cell communication;cell-cell adhesion;cell-cell signaling;cellular component organization;cellular component organization at cellular level;cellular component organization or biogenesis;cellular component organization or biogenesis at cellular level;cellular localization;cellular macromolecule localization;cellular me…	binding;identical protein binding;protein binding;SNARE binding;syntaxin binding;syntaxin-1 binding	cell part;cytoplasm;cytoplasmic membrane-bounded vesicle;cytoplasmic part;cytoplasmic vesicle;cytosol;extracellular membrane-bounded organelle;extracellular organelle;extracellular region part;extracellular vesicular exosome;intracellular membrane-bounded organelle;intracellular organelle;intracellular organelle part;intracellular part;macromolecular complex;membrane;membrane-bounded organelle;me…		Alternativesplicing;Completeproteome;Cytoplasm;Diseasemutation;Epilepsy;Membrane;Mentalretardation;Polymorphism;Proteintransport;Referenceproteome;Transport	GO:0001505;GO:0002576;GO:0002791;GO:0006091;GO:0006112;GO:0006810;GO:0006836;GO:0006887;GO:0006904;GO:0006996;GO:0007009;GO:0007154;GO:0007155;GO:0007267;GO:0007268;GO:0007269;GO:0007274;GO:0007412;GO:0008104;GO:0008152;GO:0009987;GO:0010468;GO:0010608;GO:0010646;GO:0010648;GO:0010807;GO:0010941;GO:0014047;GO:0015031;GO:0015980;GO:0016043;GO:0016044;GO:0016050;GO:0016188;GO:0016192;GO:0016337;GO:…	GO:0000149;GO:0005488;GO:0005515;GO:0017075;GO:0019905;GO:0042802	GO:0005654;GO:0005737;GO:0005739;GO:0005829;GO:0005886;GO:0016020;GO:0016023;GO:0030141;GO:0031091;GO:0031410;GO:0031982;GO:0031988;GO:0032991;GO:0043226;GO:0043227;GO:0043229;GO:0043230;GO:0043231;GO:0043234;GO:0044421;GO:0044422;GO:0044424;GO:0044428;GO:0044444;GO:0044446;GO:0044464;GO:0065010;GO:0070062	3	3	3	114	114	114	41265	0	21042	55557000	17	4	51497.7	188196
0	0	0	0	0	51581	0	0	0	123280	312230	0	0	1020800	492600	0	0	0	340300	534260	448170	1188400	286720	290770	541030				anatomical structure homeostasis;antibacterial humoral response;antimicrobial humoral response;biological regulation;cellular component organization;cellular component organization or biogenesis;cellular membrane organization;cellular process;defense response;defense response to bacterium;endocytosis;establishment of localization;glomerular filtration;homeostatic process;humoral immune response;i…	antigen binding;binding	blood microparticle;dimeric IgA immunoglobulin complex;extracellular membrane-bounded organelle;extracellular organelle;extracellular region;extracellular region part;extracellular space;extracellular vesicular exosome;IgA immunoglobulin complex;IgA immunoglobulin complex, circulating;immunoglobulin complex;immunoglobulin complex, circulating;macromolecular complex;membrane-bounded organelle;memb…		3D-structure;Completeproteome;Directproteinsequencing;Disulfidebond;Glycoprotein;ImmunoglobulinCregion;Immunoglobulindomain;Referenceproteome;Repeat	GO:0001894;GO:0001895;GO:0002376;GO:0003008;GO:0003014;GO:0003094;GO:0006810;GO:0006897;GO:0006898;GO:0006950;GO:0006952;GO:0006955;GO:0006959;GO:0009607;GO:0009617;GO:0009893;GO:0009987;GO:0010324;GO:0016043;GO:0016044;GO:0016192;GO:0019222;GO:0019730;GO:0019731;GO:0032501;GO:0042592;GO:0042742;GO:0048518;GO:0050789;GO:0050896;GO:0051234;GO:0051704;GO:0051707;GO:0060249;GO:0060263;GO:0060267;GO:…	GO:0003823;GO:0005488	GO:0005576;GO:0005615;GO:0019814;GO:0031982;GO:0031988;GO:0032991;GO:0042571;GO:0043226;GO:0043227;GO:0043230;GO:0043234;GO:0044421;GO:0065010;GO:0070062;GO:0071745;GO:0071746;GO:0071748;GO:0071749;GO:0071750;GO:0071751;GO:0071752;GO:0072562	9	2	2	421	118	118	36508	0	18427	149360000	14	5	19495.8	486118
13019000	11609000	11176000	17185000	0	239390	18489000	11339000	12907000	13435000	0	12988000	173810	6228800	5193800	5508300	0	0	8434400	7623500	7773400	7127800	7058200	8988600	9764100				activation of immune response;biological regulation;cellular component organization;cellular component organization or biogenesis;cellular membrane organization;cellular process;complement activation;complement activation, classical pathway;defense response;endocytosis;establishment of localization;humoral immune response;immune effector process;immune response;immune system process;innate immune…	antigen binding;binding	blood microparticle;cell part;extracellular membrane-bounded organelle;extracellular organelle;extracellular region;extracellular region part;extracellular space;extracellular vesicular exosome;membrane;membrane-bounded organelle;membrane-bounded vesicle;organelle;plasma membrane;vesicle		3D-structure;Completeproteome;Directproteinsequencing;Immunoglobulindomain;ImmunoglobulinVregion;Polymorphism;Pyrrolidonecarboxylicacid;Referenceproteome;Signal	GO:0002252;GO:0002253;GO:0002376;GO:0002682;GO:0002684;GO:0006810;GO:0006897;GO:0006898;GO:0006950;GO:0006952;GO:0006955;GO:0006956;GO:0006958;GO:0006959;GO:0008152;GO:0009987;GO:0010324;GO:0016043;GO:0016044;GO:0016192;GO:0019538;GO:0043170;GO:0044238;GO:0045087;GO:0048518;GO:0048583;GO:0048584;GO:0050776;GO:0050778;GO:0050789;GO:0050896;GO:0051234;GO:0061024;GO:0065007;GO:0071840;GO:0072376	GO:0003823;GO:0005488	GO:0005576;GO:0005615;GO:0005886;GO:0016020;GO:0031982;GO:0031988;GO:0043226;GO:0043227;GO:0043230;GO:0044421;GO:0044464;GO:0065010;GO:0070062;GO:0072562	3	1	1	222	94	94	12947	0	78236	1789400000	7	32	7.4344e+06	6.18667e+06
2169500	2694900	1872400	5280800	6042600	5029800	7328200	6095700	4643600	5364600	11481000	9141800	10967000	1917400	1616900	1180300	1819000	2877200	3277600	2089600	1862000	2265600	4051400	2239700	2822200				biological regulation;blood coagulation;cell activation;cell migration;cell motility;cellular component movement;cellular macromolecule metabolic process;cellular metabolic process;cellular process;cellular protein metabolic process;coagulation;defense response;establishment of localization;establishment of localization in cell;exocytosis;fibrinolysis;hemostasis;immune response;immune system proc…	binding;calcium ion binding;cation binding;endopeptidase inhibitor activity;endopeptidase regulator activity;enzyme inhibitor activity;enzyme regulator activity;ion binding;metal ion binding;peptidase inhibitor activity;peptidase regulator activity	blood microparticle;cell part;cytoplasmic membrane-bounded vesicle lumen;cytoplasmic part;cytoplasmic vesicle part;endoplasmic reticulum membrane;endoplasmic reticulum part;extracellular membrane-bounded organelle;extracellular organelle;extracellular region;extracellular region part;extracellular space;extracellular vesicular exosome;Golgi apparatus part;Golgi lumen;Golgi membrane;intracellular …	Complement and coagulation cascades	3D-structure;Bloodcoagulation;Calcium;Cleavageonpairofbasicresidues;Completeproteome;Diseasemutation;Disulfidebond;EGF-likedomain;Fibrinolysis;Gamma-carboxyglutamicacid;Glycoprotein;Hemostasis;Hydroxylation;Polymorphism;Proteomicsidentification;Referenceproteome;Repeat;Secreted;Signal;Thrombophilia;Zymogen	GO:0001775;GO:0002376;GO:0002576;GO:0002673;GO:0002682;GO:0002697;GO:0002920;GO:0006464;GO:0006508;GO:0006810;GO:0006887;GO:0006928;GO:0006950;GO:0006952;GO:0006955;GO:0007596;GO:0007599;GO:0008152;GO:0009987;GO:0010466;GO:0010468;GO:0010951;GO:0016192;GO:0016477;GO:0017187;GO:0018193;GO:0018200;GO:0018214;GO:0019222;GO:0019538;GO:0030168;GO:0030193;GO:0030195;GO:0030449;GO:0031347;GO:0032101;GO:…	GO:0004857;GO:0004866;GO:0005488;GO:0005509;GO:0030234;GO:0030414;GO:0043167;GO:0043169;GO:0046872;GO:0061134;GO:0061135	GO:0000139;GO:0005576;GO:0005615;GO:0005789;GO:0005796;GO:0005886;GO:0016020;GO:0031090;GO:0031093;GO:0031974;GO:0031982;GO:0031983;GO:0031988;GO:0034774;GO:0043226;GO:0043227;GO:0043230;GO:0043233;GO:0044421;GO:0044422;GO:0044424;GO:0044425;GO:0044431;GO:0044432;GO:0044433;GO:0044444;GO:0044446;GO:0044464;GO:0060205;GO:0065010;GO:0070013;GO:0070062;GO:0072562	17	17	17	252	252	252	73757	0	29143	8956900000	30	190	2.10932e+06	1.99595e+06
4423900	3908600	3034800	0	0	0	64637	506630	0	1485700	0	0	0	0	430050	1476000	1019100	1235300	1159400	1780000	1437100	1357200	1410900	249380	0				biological regulation;cell cycle;cell cycle checkpoint;cellular component assembly;cellular component assembly at cellular level;cellular component disassembly;cellular component disassembly at cellular level;cellular component organization;cellular component organization at cellular level;cellular component organization or biogenesis;cellular component organization or biogenesis at cellular leve…	binding;chromatin binding;chromatin DNA binding;core promoter binding;core promoter proximal region DNA binding;core promoter proximal region sequence-specific DNA binding;core promoter sequence-specific DNA binding;damaged DNA binding;DNA binding;enhancer binding;enhancer sequence-specific DNA binding;enzyme binding;histone binding;nucleic acid binding;nucleosomal DNA binding;nucleosome binding;…	cell part;chromatin;chromosomal part;chromosome;condensed chromosome;condensed nuclear chromosome;euchromatin;extracellular membrane-bounded organelle;extracellular organelle;extracellular region part;extracellular vesicular exosome;germ cell nucleus;heterochromatin;intracellular membrane-bounded organelle;intracellular non-membrane-bounded organelle;intracellular organelle;intracellular organell…	Systemic lupus erythematosus	3D-structure;Acetylation;Alternativesplicing;Cellcycle;Chromosome;Citrullination;Completeproteome;DNA-binding;DNAdamage;DNArecombination;DNArepair;Host-virusinteraction;Isopeptidebond;Meiosis;Methylation;Nucleosomecore;Nucleus;Phosphoprotein;Polymorphism;Proteomicsidentification;Referenceproteome;Ublconjugation	GO:0000075;GO:0000077;GO:0000724;GO:0000725;GO:0006139;GO:0006259;GO:0006281;GO:0006282;GO:0006302;GO:0006310;GO:0006325;GO:0006334;GO:0006337;GO:0006355;GO:0006357;GO:0006807;GO:0006950;GO:0006974;GO:0006996;GO:0007049;GO:0007276;GO:0007283;GO:0008152;GO:0008285;GO:0009314;GO:0009628;GO:0009719;GO:0009725;GO:0009889;GO:0009891;GO:0009893;GO:0009987;GO:0010033;GO:0010212;GO:0010468;GO:0010556;GO:…	GO:0000975;GO:0000976;GO:0000977;GO:0000978;GO:0000979;GO:0000980;GO:0000987;GO:0001012;GO:0001046;GO:0001047;GO:0001067;GO:0001158;GO:0001159;GO:0003676;GO:0003677;GO:0003682;GO:0003684;GO:0005488;GO:0005515;GO:0019899;GO:0031490;GO:0031491;GO:0031492;GO:0035326;GO:0042393;GO:0043565;GO:0043566;GO:0044212	GO:0000228;GO:0000785;GO:0000786;GO:0000788;GO:0000790;GO:0000791;GO:0000792;GO:0000793;GO:0000794;GO:0000803;GO:0001673;GO:0001741;GO:0005634;GO:0005654;GO:0005657;GO:0005694;GO:0005719;GO:0005720;GO:0031982;GO:0031988;GO:0032991;GO:0032993;GO:0035861;GO:0043073;GO:0043226;GO:0043227;GO:0043228;GO:0043229;GO:0043230;GO:0043231;GO:0043232;GO:0044421;GO:0044422;GO:0044424;GO:0044427;GO:0044428;GO:…	3	3	3	269	269	269	14135	0	27351	442940000	5	18	2.0572e+06	2.95376e+06
877150	1244200	1043900	1774400	1548100	1395300	3184200	2714200	2416800	2652300	7668400	9679900	7323600	3401300	2830000	3216700	2938000	3471400	2102100	1004600	863790	902660	1809800	1162600	2002000				activation of immune response;biological regulation;complement activation;complement activation, classical pathway;defense response;detection of biotic stimulus;detection of chemical stimulus;detection of molecule of bacterial origin;detection of stimulus;humoral immune response;immune effector process;immune response;immune system process;inflammatory response;innate immune response;macromolecul…	binding;carbohydrate binding;complement binding;complement component C1q binding;endopeptidase inhibitor activity;endopeptidase regulator activity;enzyme inhibitor activity;enzyme regulator activity;opsonin binding;peptidase inhibitor activity;peptidase regulator activity;protein binding	blood microparticle;cell part;extracellular membrane-bounded organelle;extracellular organelle;extracellular region;extracellular region part;extracellular space;extracellular vesicular exosome;membrane;membrane-bounded organelle;membrane-bounded vesicle;organelle;other organism cell;other organism part;plasma membrane;vesicle	Complement and coagulation cascades;Staphylococcus aureus infection;Systemic lupus erythematosus	3D-structure;Alternativesplicing;Bloodgroupantigen;Cleavageonpairofbasicresidues;Complementpathway;Completeproteome;Directproteinsequencing;Diseasemutation;Disulfidebond;Glycoprotein;Immunity;Inflammatoryresponse;Innateimmunity;Polymorphism;Proteomicsidentification;Referenceproteome;Secreted;Signal;Sulfation;Systemiclupuserythematosus;Thioesterbond	GO:0002237;GO:0002252;GO:0002253;GO:0002376;GO:0002673;GO:0002682;GO:0002684;GO:0002697;GO:0002920;GO:0006950;GO:0006952;GO:0006954;GO:0006955;GO:0006956;GO:0006958;GO:0006959;GO:0008152;GO:0008228;GO:0009593;GO:0009595;GO:0009607;GO:0009611;GO:0010033;GO:0010468;GO:0019222;GO:0019538;GO:0030100;GO:0030449;GO:0031347;GO:0032101;GO:0032490;GO:0032879;GO:0042221;GO:0043170;GO:0044238;GO:0045087;GO:…	GO:0001846;GO:0001848;GO:0001849;GO:0004857;GO:0004866;GO:0005488;GO:0005515;GO:0030234;GO:0030246;GO:0030414;GO:0061134;GO:0061135	GO:0005576;GO:0005615;GO:0005886;GO:0016020;GO:0031982;GO:0031988;GO:0043226;GO:0043227;GO:0043230;GO:0044216;GO:0044217;GO:0044421;GO:0044464;GO:0065010;GO:0070062;GO:0072562	32	32	32	235	235	235	18766	0	32331	15359000000	77	279	768173	621274
237570	242400	267250	0	0	0	0	0	0	36565	0	0	0	196970	169400	159600	60086	49505	48700	163770	124350	171950	53250	72810	140180				anatomical structure development;axon guidance;biological regulation;cellular component organization;cellular component organization at cellular level;cellular component organization or biogenesis;cellular component organization or biogenesis at cellular level;cellular membrane organization;cellular metabolic process;cellular nitrogen compound metabolic process;cellular process;cellular response …	catalytic activity;dihydropyrimidinase activity;hydrolase activity;hydrolase activity, acting on carbon-nitrogen (but not peptide) bonds;hydrolase activity, acting on carbon-nitrogen (but not peptide) bonds, in cyclic amides	axon part;cell body;cell part;cell projection;cell projection part;cytoplasmic part;cytoskeleton;cytosol;dendrite;extracellular membrane-bounded organelle;extracellular organelle;extracellular region part;extracellular vesicular exosome;growth cone;intracellular membrane-bounded organelle;intracellular non-membrane-bounded organelle;intracellular organelle;intracellular part;macromolecular comple…	Axon guidance	3D-structure;Alternativesplicing;Completeproteome;Cytoplasm;Cytoskeleton;Developmentalprotein;Differentiation;Directproteinsequencing;Membrane;Neurogenesis;Phosphoprotein;Polymorphism;Referenceproteome;S-nitrosylation	GO:0001558;GO:0001975;GO:0006139;GO:0006807;GO:0006810;GO:0006897;GO:0006935;GO:0006996;GO:0007010;GO:0007165;GO:0007399;GO:0007411;GO:0008152;GO:0009605;GO:0009719;GO:0009987;GO:0010033;GO:0010243;GO:0010324;GO:0010646;GO:0010769;GO:0010975;GO:0014048;GO:0014049;GO:0014070;GO:0014073;GO:0014075;GO:0016043;GO:0016044;GO:0016192;GO:0021510;GO:0021772;GO:0022603;GO:0022604;GO:0023051;GO:0030516;GO:…	GO:0003824;GO:0004157;GO:0016787;GO:0016810;GO:0016812	GO:0005739;GO:0005829;GO:0005856;GO:0016020;GO:0030425;GO:0030426;GO:0030427;GO:0031982;GO:0031988;GO:0032991;GO:0033267;GO:0042995;GO:0043005;GO:0043025;GO:0043195;GO:0043226;GO:0043227;GO:0043228;GO:0043229;GO:0043230;GO:0043231;GO:0043232;GO:0043234;GO:0044297;GO:0044421;GO:0044424;GO:0044444;GO:0044456;GO:0044463;GO:0044464;GO:0065010;GO:0070062	6	6	6	115	115	115	73502	0	38082	308340000	38	17	133452	259805
6363800	6792100	5557300	1628500	2162600	1405500	603590	1251800	1039000	956090	62186	1400000	1422600	18340000	1192300	17459000	1215400	1660000	2385600	10645000	9520000	10659000	8801700	9917200	10832000				activation of immune response;anatomical structure homeostasis;biological regulation;complement activation;complement activation, classical pathway;defense response;homeostatic process;humoral immune response;immune effector process;immune response;immune system process;innate immune response;macromolecule metabolic process;metabolic process;positive regulation of biological process;positive regu…	antigen binding;binding	blood microparticle;extracellular membrane-bounded organelle;extracellular organelle;extracellular region;extracellular region part;extracellular space;extracellular vesicular exosome;membrane-bounded organelle;membrane-bounded vesicle;organelle;vesicle		Completeproteome;Directproteinsequencing;Disulfidebond;Glycoprotein;ImmunoglobulinCregion;Immunoglobulindomain;Polymorphism;Referenceproteome;Repeat;Secreted	GO:0001894;GO:0001895;GO:0002252;GO:0002253;GO:0002376;GO:0002682;GO:0002684;GO:0006950;GO:0006952;GO:0006955;GO:0006956;GO:0006958;GO:0006959;GO:0008152;GO:0019538;GO:0042592;GO:0043170;GO:0044238;GO:0045087;GO:0048518;GO:0048583;GO:0048584;GO:0050776;GO:0050778;GO:0050789;GO:0050896;GO:0060249;GO:0065007;GO:0065008;GO:0072376	GO:0003823;GO:0005488	GO:0005576;GO:0005615;GO:0031982;GO:0031988;GO:0043226;GO:0043227;GO:0043230;GO:0044421;GO:0065010;GO:0070062;GO:0072562	11	5	3	327	204	141	49021	0	54165	5692000000	19	105	2.62485e+06	8.19962e+06
45643000	33595000	38205000	66238000	66617000	67982000	65352000	31977000	29239000	27280000	14777000	47694000	11583000	32591000	33560000	37484000	32314000	29884000	29474000	35318000	24559000	27679000	22735000	40806000	44979000				anatomical structure homeostasis;antibacterial humoral response;antimicrobial humoral response;biological regulation;cellular component organization;cellular component organization or biogenesis;cellular macromolecule metabolic process;cellular membrane organization;cellular metabolic process;cellular process;cellular protein metabolic process;defense response;defense response to bacterium;endocy…	antigen binding;binding	blood microparticle;dimeric IgA immunoglobulin complex;extracellular membrane-bounded organelle;extracellular organelle;extracellular region;extracellular region part;extracellular space;extracellular vesicular exosome;IgA immunoglobulin complex;IgA immunoglobulin complex, circulating;immunoglobulin complex;immunoglobulin complex, circulating;macromolecular complex;membrane-bounded organelle;memb…		3D-structure;Chromophore;Chromosomalrearrangement;Completeproteome;Directproteinsequencing;Disulfidebond;Glycoprotein;ImmunoglobulinCregion;Immunoglobulindomain;Polymorphism;Referenceproteome;Repeat	GO:0001894;GO:0001895;GO:0002376;GO:0003008;GO:0003014;GO:0003094;GO:0006464;GO:0006810;GO:0006897;GO:0006898;GO:0006950;GO:0006952;GO:0006955;GO:0006959;GO:0008152;GO:0009607;GO:0009617;GO:0009893;GO:0009987;GO:0010324;GO:0016043;GO:0016044;GO:0016192;GO:0018298;GO:0019222;GO:0019538;GO:0019730;GO:0019731;GO:0032501;GO:0042592;GO:0042742;GO:0043170;GO:0043412;GO:0044237;GO:0044238;GO:0044260;GO:…	GO:0003823;GO:0005488	GO:0005576;GO:0005615;GO:0019814;GO:0031982;GO:0031988;GO:0032991;GO:0042571;GO:0043226;GO:0043227;GO:0043230;GO:0043234;GO:0044421;GO:0065010;GO:0070062;GO:0071745;GO:0071746;GO:0071748;GO:0071749;GO:0071750;GO:0071751;GO:0071752;GO:0072562	11	11	4	407	407	148	42848	0	11334	18890000000	14	76	1.50802e+07	5.35923e+06
10052000	9735700	9647500	14214000	21894000	21113000	21159000	12788000	12475000	12178000	24663000	16068000	13879000	19654000	18571000	18429000	14205000	14159000	13621000	8749400	8937400	9600400	9466300	8681200	10366000				activation of immune response;biological regulation;complement activation;complement activation, classical pathway;defense response;humoral immune response;immune effector process;immune response;immune system process;innate immune response;macromolecule metabolic process;metabolic process;positive regulation of biological process;positive regulation of immune response;positive regulation of immu…	antigen binding;binding	blood microparticle;extracellular membrane-bounded organelle;extracellular organelle;extracellular region;extracellular region part;extracellular space;extracellular vesicular exosome;membrane-bounded organelle;membrane-bounded vesicle;organelle;vesicle		3D-structure;Completeproteome;Directproteinsequencing;Disulfidebond;Glycoprotein;ImmunoglobulinCregion;Immunoglobulindomain;Referenceproteome;Secreted	GO:0002252;GO:0002253;GO:0002376;GO:0002682;GO:0002684;GO:0006950;GO:0006952;GO:0006955;GO:0006956;GO:0006958;GO:0006959;GO:0008152;GO:0019538;GO:0043170;GO:0044238;GO:0045087;GO:0048518;GO:0048583;GO:0048584;GO:0050776;GO:0050778;GO:0050789;GO:0050896;GO:0065007;GO:0072376	GO:0003823;GO:0005488	GO:0005576;GO:0005615;GO:0031982;GO:0031988;GO:0043226;GO:0043227;GO:0043230;GO:0044421;GO:0065010;GO:0070062;GO:0072562	10	5	4	322	208	172	43805	0	5174	7780000000	14	38	5.81893e+06	4.49148e+06
145850	153220	152230	140520	0	74204	100420	0	210830	114350	0	0	0	0	56438	0	25483	105240	183110	0	0	73362	0	0	0				acidic amino acid transport;adult behavior;aging;amine transport;amino acid import;amino acid transport;anatomical structure development;anion transport;aspartate transport;behavior;biological regulation;carboxylic acid transport;cell communication;cell-cell signaling;cellular process;cellular response to external stimulus;cellular response to extracellular stimulus;cellular response to stimulus;…	acidic amino acid transmembrane transporter activity;active transmembrane transporter activity;amine transmembrane transporter activity;amino acid transmembrane transporter activity;anion transmembrane transporter activity;anion:cation symporter activity;carboxylic acid transmembrane transporter activity;cation transmembrane transporter activity;cation:amino acid symporter activity;dicarboxylic a…	axolemma;axon part;cell part;cell projection membrane;cell projection part;integral to membrane;intrinsic to membrane;leading edge membrane;membrane;membrane part;neuron projection membrane;plasma membrane;plasma membrane part	Amyotrophic lateral sclerosis (ALS)	Alternativesplicing;Completeproteome;Glycoprotein;Lipoprotein;Membrane;Palmitate;Phosphoprotein;Proteomicsidentification;Referenceproteome;Symport;Transmembrane;Transmembranehelix;Transport	GO:0001101;GO:0001505;GO:0006810;GO:0006811;GO:0006820;GO:0006836;GO:0006865;GO:0006950;GO:0007154;GO:0007267;GO:0007268;GO:0007269;GO:0007568;GO:0007610;GO:0007632;GO:0009314;GO:0009416;GO:0009605;GO:0009611;GO:0009628;GO:0009719;GO:0009987;GO:0009991;GO:0010033;GO:0010243;GO:0010259;GO:0010827;GO:0010828;GO:0014047;GO:0014075;GO:0015711;GO:0015800;GO:0015807;GO:0015810;GO:0015813;GO:0015837;GO:…	GO:0005215;GO:0005275;GO:0005283;GO:0005310;GO:0005313;GO:0005342;GO:0005343;GO:0005416;GO:0008324;GO:0008509;GO:0015075;GO:0015077;GO:0015081;GO:0015171;GO:0015172;GO:0015179;GO:0015291;GO:0015293;GO:0015294;GO:0015296;GO:0015370;GO:0015501;GO:0017153;GO:0022804;GO:0022857;GO:0022890;GO:0022891;GO:0022892;GO:0046873;GO:0046943	GO:0005886;GO:0016020;GO:0016021;GO:0030673;GO:0031224;GO:0031253;GO:0031256;GO:0032589;GO:0033267;GO:0044425;GO:0044459;GO:0044463;GO:0044464	2	2	2	42	42	42	62104	0	19545	149990000	21	10	56773.5	107901
1583300	1724100	1791800	487180	1777700	1373200	1598900	419050	1696400	2732100	1902000	1202700	81277	3517400	2322000	1948600	599450	923230	588330	1905700	2362800	1513000	3481800	1410100	1420400				activation of immune response;biological regulation;complement activation;complement activation, classical pathway;defense response;humoral immune response;immune effector process;immune response;immune system process;innate immune response;macromolecule metabolic process;metabolic process;positive regulation of biological process;positive regulation of immune response;positive regulation of immu…	binding;calcium ion binding;catalytic activity;cation binding;endopeptidase activity;hydrolase activity;ion binding;metal ion binding;peptidase activity;peptidase activity, acting on L-amino acid peptides;serine hydrolase activity;serine-type endopeptidase activity;serine-type peptidase activity	blood microparticle;extracellular membrane-bounded organelle;extracellular organelle;extracellular region;extracellular region part;extracellular vesicular exosome;membrane-bounded organelle;membrane-bounded vesicle;organelle;vesicle	Complement and coagulation cascades;Phagosome;Staphylococcus aureus infection;Systemic lupus erythematosus	3D-structure;Complementpathway;Completeproteome;Directproteinsequencing;Disulfidebond;EGF-likedomain;Glycoprotein;Hydrolase;Hydroxylation;Immunity;Innateimmunity;Phosphoprotein;Polymorphism;Protease;Proteomicsidentification;Referenceproteome;Repeat;Serineprotease;Signal;Sushi	GO:0002252;GO:0002253;GO:0002376;GO:0002682;GO:0002684;GO:0006950;GO:0006952;GO:0006955;GO:0006956;GO:0006958;GO:0006959;GO:0008152;GO:0019538;GO:0043170;GO:0044238;GO:0045087;GO:0048518;GO:0048583;GO:0048584;GO:0050776;GO:0050778;GO:0050789;GO:0050896;GO:0065007;GO:0072376	GO:0003824;GO:0004175;GO:0004252;GO:0005488;GO:0005509;GO:0008233;GO:0008236;GO:0016787;GO:0017171;GO:0043167;GO:0043169;GO:0046872;GO:0070011	GO:0005576;GO:0031982;GO:0031988;GO:0043226;GO:0043227;GO:0043230;GO:0044421;GO:0065010;GO:0070062;GO:0072562	18	18	18	298	298	298	80173	0	15414	3785700000	34	63	459575	1.35248e+06
20794000	18383000	17813000	3887500	52587000	48472000	58462000	40613000	35544000	2809100	26692000	25734000	2614200	13310000	1265300	4702500	0	2574800	2297500	20836000	12386000	5182000	14434000	1982900	20331000								Completeproteome;Proteomicsidentification;Referenceproteome				4	4	1	455	455	109	11167	0	50666	5422700000	6	53	2.11979e+07	2.57432e+07
3707300	1209400	2266600	1428000	1343700	1356200	1853500	904510	1104500	1171700	0	0	0	988530	682430	524180	0	0	895710	741580	633700	649560	1748400	1315900	949310				anatomical structure homeostasis;biological regulation;blood coagulation;cellular component assembly;cellular component assembly at cellular level;cellular component organization;cellular component organization at cellular level;cellular component organization or biogenesis;cellular component organization or biogenesis at cellular level;cellular macromolecular complex assembly;cellular macromolec…	binding;chromatin binding;chromatin DNA binding;core promoter binding;core promoter sequence-specific DNA binding;DNA binding;enhancer binding;enhancer sequence-specific DNA binding;histone binding;nucleic acid binding;nucleosomal DNA binding;nucleosome binding;protein binding;regulatory region DNA binding;regulatory region nucleic acid binding;RNA polymerase II core promoter sequence-specific DN…	cell part;chromatin;chromosomal part;chromosome;euchromatin;extracellular membrane-bounded organelle;extracellular organelle;extracellular region;extracellular region part;extracellular vesicular exosome;intracellular membrane-bounded organelle;intracellular non-membrane-bounded organelle;intracellular organelle;intracellular organelle part;intracellular part;macromolecular complex;membrane;membr…	Systemic lupus erythematosus	3D-structure;Acetylation;Chromosome;Citrullination;Completeproteome;Directproteinsequencing;DNA-binding;Methylation;Nucleosomecore;Nucleus;Phosphoprotein;Polymorphism;Proteomicsidentification;Referenceproteome;Ublconjugation	GO:0000183;GO:0000723;GO:0001558;GO:0002230;GO:0002682;GO:0002697;GO:0002831;GO:0006139;GO:0006259;GO:0006304;GO:0006305;GO:0006306;GO:0006325;GO:0006333;GO:0006334;GO:0006335;GO:0006336;GO:0006342;GO:0006355;GO:0006461;GO:0006730;GO:0006807;GO:0006996;GO:0007165;GO:0007264;GO:0007596;GO:0007599;GO:0008152;GO:0009889;GO:0009890;GO:0009892;GO:0009987;GO:0010467;GO:0010468;GO:0010556;GO:0010558;GO:…	GO:0000975;GO:0000976;GO:0000977;GO:0000979;GO:0000980;GO:0001012;GO:0001046;GO:0001047;GO:0001067;GO:0001158;GO:0003676;GO:0003677;GO:0003682;GO:0005488;GO:0005515;GO:0031490;GO:0031491;GO:0031492;GO:0035326;GO:0042393;GO:0043565;GO:0043566;GO:0044212	GO:0000228;GO:0000785;GO:0000786;GO:0000788;GO:0000790;GO:0000791;GO:0005576;GO:0005634;GO:0005654;GO:0005694;GO:0005719;GO:0016020;GO:0031982;GO:0031988;GO:0032991;GO:0032993;GO:0043226;GO:0043227;GO:0043228;GO:0043229;GO:0043230;GO:0043231;GO:0043232;GO:0043234;GO:0044421;GO:0044422;GO:0044424;GO:0044427;GO:0044428;GO:0044446;GO:0044454;GO:0044464;GO:0065010;GO:0070062	2	2	2	174	174	174	10334	0	11074	231580000	5	5	885548	544768
191550	214560	98925	46772	56731	81923	79394	27542	47862	43753	53803	0	0	205760	121460	74789	163730	18553	0	75919	171360	0	43387	88143	133890				activation of meiosis involved in egg activation;biological regulation;calcium ion homeostasis;calcium ion transport;calcium-mediated signaling;cation homeostasis;cation transport;cell communication;cell cycle process;cell growth;cell growth involved in cardiac muscle cell development;cell surface receptor linked signaling pathway;cell-cell signaling;cellular calcium ion homeostasis;cellular cati…	adenyl nucleotide binding;adenyl ribonucleotide binding;ATP binding;binding;calmodulin binding;calmodulin-dependent protein kinase activity;catalytic activity;channel inhibitor activity;channel regulator activity;cytoskeletal protein binding;glutamate receptor binding;identical protein binding;ion channel binding;ion channel inhibitor activity;kinase activity;nucleotide binding;phosphotransferase…	axon part;calcium channel complex;cation channel complex;cell body;cell junction;cell part;cell projection part;cell-cell contact zone;cell-cell junction;cytoplasm;cytoplasmic part;cytoplasmic vesicle membrane;cytoplasmic vesicle part;cytoskeletal part;cytosol;endocytic vesicle membrane;endoplasmic reticulum membrane;endoplasmic reticulum part;initial segment;intercalated disc;intracellular membr…	Calcium signaling pathway;ErbB signaling pathway;Gastric acid secretion;Glioma;GnRH signaling pathway;ko05152;Long-term potentiation;Melanogenesis;Neurotrophin signaling pathway;Olfactory transduction;Oocyte meiosis;Phototransduction - fly;Wnt signaling pathway	3D-structure;Acetylation;Actin-binding;Alternativesplicing;ATP-binding;Calmodulin-binding;Celljunction;Cellmembrane;Completeproteome;Cytoplasm;Cytoskeleton;Developmentalprotein;Differentiation;Kinase;Membrane;Neurogenesis;Nucleotide-binding;Phosphoprotein;Polymorphism;Proteomicsidentification;Referenceproteome;Sarcoplasmicreticulum;Serine/threonine-proteinkinase;Synapse;Transferase	GO:0000082;GO:0001558;GO:0001666;GO:0002026;GO:0002028;GO:0002030;GO:0003008;GO:0003012;GO:0003254;GO:0006355;GO:0006357;GO:0006461;GO:0006464;GO:0006468;GO:0006793;GO:0006796;GO:0006810;GO:0006811;GO:0006812;GO:0006816;GO:0006873;GO:0006874;GO:0006875;GO:0006937;GO:0006942;GO:0006950;GO:0007154;GO:0007165;GO:0007166;GO:0007267;GO:0007268;GO:0007346;GO:0008016;GO:0008152;GO:0008284;GO:0009266;GO:…	GO:0000166;GO:0003824;GO:0004672;GO:0004674;GO:0004683;GO:0005102;GO:0005488;GO:0005515;GO:0005516;GO:0005524;GO:0008092;GO:0008200;GO:0016247;GO:0016248;GO:0016301;GO:0016740;GO:0016772;GO:0016773;GO:0017076;GO:0017080;GO:0019871;GO:0030554;GO:0031432;GO:0032553;GO:0032555;GO:0032559;GO:0035254;GO:0035639;GO:0042802;GO:0042803;GO:0044325;GO:0046983	GO:0005634;GO:0005654;GO:0005737;GO:0005739;GO:0005789;GO:0005815;GO:0005829;GO:0005886;GO:0005911;GO:0012506;GO:0014704;GO:0016020;GO:0030054;GO:0030315;GO:0030659;GO:0030666;GO:0031090;GO:0031594;GO:0032991;GO:0033017;GO:0033267;GO:0034702;GO:0034703;GO:0034704;GO:0042734;GO:0043025;GO:0043194;GO:0043226;GO:0043227;GO:0043229;GO:0043231;GO:0043234;GO:0044291;GO:0044297;GO:0044422;GO:0044424;GO:…	4	4	4	94	94	94	53039	0	25226	127400000	24	6	66164.3	189964
502530	646330	326960	241750	149090	343110	437310	308340	242760	171170	0	303270	167580	426080	363640	353750	150030	252900	281730	340310	360370	347530	428190	371220	276770				alcohol catabolic process;alcohol metabolic process;anatomical structure development;ATP biosynthetic process;ATP metabolic process;biosynthetic process;carbohydrate catabolic process;carbohydrate metabolic process;carboxylic acid biosynthetic process;carboxylic acid metabolic process;catabolic process;cell communication;cell motility;cellular biosynthetic process;cellular carbohydrate catabolic …	binding;catalytic activity;coenzyme binding;cofactor binding;lactate dehydrogenase activity;L-lactate dehydrogenase activity;NAD binding;nucleotide binding;oxidoreductase activity;oxidoreductase activity, acting on CH-OH group of donors;oxidoreductase activity, acting on the CH-OH group of donors, NAD or NADP as acceptor	cell part;cell projection;cell projection part;cilium;cytoplasm;cytoplasmic part;cytosol;extracellular membrane-bounded organelle;extracellular organelle;extracellular region part;extracellular vesicular exosome;flagellar fibrous sheath;flagellum part;intracellular membrane-bounded organelle;intracellular organelle;intracellular organelle part;intracellular part;membrane;membrane part;membrane ra…	Cysteine and methionine metabolism;Glycolysis / Gluconeogenesis;Propanoate metabolism;Pyruvate metabolism	3D-structure;Acetylation;Alternativesplicing;Completeproteome;Cytoplasm;Directproteinsequencing;Diseasemutation;Glycogenstoragedisease;NAD;Oxidoreductase;Phosphoprotein;Polymorphism;Proteomicsidentification;Referenceproteome;Ublconjugation	GO:0005975;GO:0005996;GO:0006006;GO:0006007;GO:0006066;GO:0006082;GO:0006089;GO:0006090;GO:0006091;GO:0006096;GO:0006139;GO:0006163;GO:0006164;GO:0006732;GO:0006733;GO:0006753;GO:0006754;GO:0006807;GO:0006928;GO:0007154;GO:0008152;GO:0009056;GO:0009058;GO:0009117;GO:0009141;GO:0009142;GO:0009144;GO:0009145;GO:0009150;GO:0009152;GO:0009165;GO:0009199;GO:0009201;GO:0009205;GO:0009206;GO:0009259;GO:…	GO:0000166;GO:0003824;GO:0004457;GO:0004459;GO:0005488;GO:0016491;GO:0016614;GO:0016616;GO:0048037;GO:0050662;GO:0051287	GO:0005634;GO:0005737;GO:0005739;GO:0005829;GO:0005929;GO:0016020;GO:0031514;GO:0031982;GO:0031988;GO:0035686;GO:0042995;GO:0043226;GO:0043227;GO:0043229;GO:0043230;GO:0043231;GO:0044421;GO:0044422;GO:0044424;GO:0044425;GO:0044442;GO:0044444;GO:0044446;GO:0044460;GO:0044463;GO:0044464;GO:0045121;GO:0065010;GO:0070062	2	2	2	62	62	62	37294	0	13141	215320000	17	4	166239	128677
383400	355860	383430	159500	0	0	280870	0	0	0	111450	75920	0	298590	243010	76287	153000	141170	164160	0	0	150730	166810	284690	210760				acetyl-CoA catabolic process;acetyl-CoA metabolic process;alcohol biosynthetic process;alcohol metabolic process;biological regulation;biosynthetic process;carbohydrate biosynthetic process;carbohydrate metabolic process;carboxylic acid metabolic process;catabolic process;cellular biosynthetic process;cellular carbohydrate biosynthetic process;cellular carbohydrate metabolic process;cellular cata…	binding;catalytic activity;coenzyme binding;cofactor binding;diiodophenylpyruvate reductase activity;L-malate dehydrogenase activity;malate dehydrogenase activity;malic enzyme activity;NAD binding;nucleotide binding;oxidoreductase activity;oxidoreductase activity, acting on CH-OH group of donors;oxidoreductase activity, acting on the CH-OH group of donors, NAD or NADP as acceptor	cell part;centrosome;cytoplasm;cytoplasmic part;cytoskeletal part;cytosol;extracellular membrane-bounded organelle;extracellular organelle;extracellular region part;extracellular space;extracellular vesicular exosome;intracellular membrane-bounded organelle;intracellular non-membrane-bounded organelle;intracellular organelle;intracellular organelle part;intracellular part;membrane-bounded organel…	Carbon fixation in photosynthetic organisms;Citrate cycle (TCA cycle);Glyoxylate and dicarboxylate metabolism;Proximal tubule bicarbonate reclamation;Pyruvate metabolism	Acetylation;Alternativesplicing;Completeproteome;Cytoplasm;Directproteinsequencing;NAD;Oxidoreductase;Phosphoprotein;Proteomicsidentification;Referenceproteome;Tricarboxylicacidcycle;Ublconjugation	GO:0002230;GO:0002682;GO:0002697;GO:0002831;GO:0005975;GO:0005996;GO:0006006;GO:0006066;GO:0006082;GO:0006084;GO:0006094;GO:0006099;GO:0006107;GO:0006108;GO:0006139;GO:0006732;GO:0006733;GO:0006734;GO:0006753;GO:0006807;GO:0008152;GO:0009056;GO:0009058;GO:0009109;GO:0009117;GO:0009987;GO:0016051;GO:0019318;GO:0019319;GO:0019362;GO:0019674;GO:0019752;GO:0031347;GO:0034637;GO:0034641;GO:0042180;GO:…	GO:0000166;GO:0003824;GO:0004470;GO:0005488;GO:0016491;GO:0016614;GO:0016615;GO:0016616;GO:0030060;GO:0047860;GO:0048037;GO:0050662;GO:0051287	GO:0005615;GO:0005737;GO:0005739;GO:0005813;GO:0005815;GO:0005829;GO:0031982;GO:0031988;GO:0043226;GO:0043227;GO:0043228;GO:0043229;GO:0043230;GO:0043231;GO:0043232;GO:0044421;GO:0044422;GO:0044424;GO:0044430;GO:0044444;GO:0044446;GO:0044464;GO:0065010;GO:0070062	2	2	2	138	138	138	23038	0	11807	97958000	11	5	171249	565794
83818	47012	122040	284590	184490	597380	251800	650110	444850	440640	1267500	1053600	1507500	650240	889430	801830	639500	737960	1052300	158760	140230	249920	498480	368970	646900				activation of immune response;aging;biological regulation;blood circulation;blood coagulation;blood coagulation, intrinsic pathway;cell activation;cellular process;circulatory system process;coagulation;complement activation;complement activation, classical pathway;defense response;developmental process;establishment of localization;establishment of localization in cell;exocytosis;fibrinolysis;he…	endopeptidase inhibitor activity;endopeptidase regulator activity;enzyme inhibitor activity;enzyme regulator activity;peptidase inhibitor activity;peptidase regulator activity;serine-type endopeptidase inhibitor activity	blood microparticle;cell part;cytoplasmic membrane-bounded vesicle lumen;cytoplasmic part;cytoplasmic vesicle part;extracellular membrane-bounded organelle;extracellular organelle;extracellular region;extracellular region part;extracellular space;extracellular vesicular exosome;intracellular organelle part;intracellular part;membrane-bounded organelle;membrane-bounded vesicle;membrane-enclosed lu…	Complement and coagulation cascades	3D-structure;Alternativesplicing;Bloodcoagulation;Complementpathway;Completeproteome;Directproteinsequencing;Diseasemutation;Disulfidebond;Fibrinolysis;Glycoprotein;Hemostasis;Immunity;Innateimmunity;Polymorphism;Proteaseinhibitor;Proteomicsidentification;Referenceproteome;Repeat;Secreted;Serineproteaseinhibitor;Signal	GO:0001775;GO:0001868;GO:0001869;GO:0002252;GO:0002253;GO:0002376;GO:0002576;GO:0002673;GO:0002682;GO:0002683;GO:0002684;GO:0002697;GO:0002698;GO:0002920;GO:0002921;GO:0003008;GO:0003013;GO:0006810;GO:0006887;GO:0006950;GO:0006952;GO:0006955;GO:0006956;GO:0006958;GO:0006959;GO:0007568;GO:0007596;GO:0007597;GO:0007599;GO:0008015;GO:0008152;GO:0009892;GO:0009987;GO:0010466;GO:0010468;GO:0010605;GO:…	GO:0004857;GO:0004866;GO:0004867;GO:0030234;GO:0030414;GO:0061134;GO:0061135	GO:0005576;GO:0005615;GO:0031093;GO:0031974;GO:0031982;GO:0031983;GO:0031988;GO:0034774;GO:0043226;GO:0043227;GO:0043230;GO:0043233;GO:0044421;GO:0044422;GO:0044424;GO:0044433;GO:0044444;GO:0044446;GO:0044464;GO:0060205;GO:0065010;GO:0070062;GO:0072562	4	4	4	97	97	97	50989	0	32502	569450000	21	22	185647	311021
464890	423160	312720	380390	807660	400740	99770	1464700	1039400	1968300	1580600	1889900	1103800	1377800	1891200	1276400	1639200	3815700	1540900	231960	475850	305190	782300	874750	422090				activation of NF-kappaB-inducing kinase activity;activation of phospholipase C activity;activation of phospholipase C activity by G-protein coupled receptor protein signaling pathway coupled to IP3 second messenger;activation of protein kinase activity;aging;anatomical structure development;anatomical structure morphogenesis;angiotensin maturation;angiotensin mediated vasoconstriction involved in…	angiotensin receptor binding;binding;channel regulator activity;endopeptidase inhibitor activity;endopeptidase regulator activity;enzyme activator activity;enzyme inhibitor activity;enzyme regulator activity;G-protein-coupled receptor binding;growth factor activity;hormone activity;peptidase inhibitor activity;peptidase regulator activity;protein binding;receptor binding;serine-type endopeptidase…	blood microparticle;cell part;cytoplasm;extracellular membrane-bounded organelle;extracellular organelle;extracellular region;extracellular region part;extracellular space;extracellular vesicular exosome;intracellular part;membrane-bounded organelle;membrane-bounded vesicle;organelle;vesicle	Hypertrophic cardiomyopathy (HCM);Renin-angiotensin system;Vascular smooth muscle contraction	3D-structure;Completeproteome;Directproteinsequencing;Diseasemutation;Disulfidebond;Glycoprotein;Polymorphism;Referenceproteome;Secreted;Signal;Vasoactive;Vasoconstrictor	GO:0000165;GO:0001543;GO:0001558;GO:0001568;GO:0001658;GO:0001763;GO:0001775;GO:0001817;GO:0001819;GO:0001822;GO:0001885;GO:0001932;GO:0001934;GO:0001974;GO:0001990;GO:0001998;GO:0001999;GO:0002003;GO:0002009;GO:0002016;GO:0002018;GO:0002019;GO:0002028;GO:0002034;GO:0002064;GO:0003008;GO:0003012;GO:0003013;GO:0003014;GO:0003018;GO:0003044;GO:0003051;GO:0003071;GO:0003072;GO:0003073;GO:0003081;GO:…	GO:0001664;GO:0004857;GO:0004866;GO:0004867;GO:0005102;GO:0005179;GO:0005488;GO:0005515;GO:0008047;GO:0008083;GO:0016176;GO:0016247;GO:0017080;GO:0030234;GO:0030414;GO:0031701;GO:0031702;GO:0031703;GO:0061134;GO:0061135	GO:0005576;GO:0005615;GO:0005737;GO:0031982;GO:0031988;GO:0043226;GO:0043227;GO:0043230;GO:0044421;GO:0044424;GO:0044464;GO:0065010;GO:0070062;GO:0072562	8	8	8	382	382	382	3067	0	1248	1105600000	15	25	211319	1.07743e+06
134070	2469700	1960000	42029	77776	0	91885	697540	441110	497560	0	311750	2134500	0	0	0	75356	3455000	2965700	0	0	0	0	1859000	0				alcohol catabolic process;alcohol metabolic process;carbohydrate catabolic process;carbohydrate metabolic process;catabolic process;cell death;cellular carbohydrate catabolic process;cellular carbohydrate metabolic process;cellular metabolic process;cellular process;death;generation of precursor metabolites and energy;glucose catabolic process;glucose metabolic process;glycolysis;hexose catabolic…	adenyl nucleotide binding;adenyl ribonucleotide binding;alkali metal ion binding;antigen binding;ATP binding;binding;catalytic activity;cation binding;ion binding;kinase activity;magnesium ion binding;metal ion binding;MHC class II protein complex binding;MHC protein complex binding;nucleotide binding;phosphotransferase activity, alcohol group as acceptor;potassium ion binding;purine nucleotide b…	cell part;cell projection;cilium;cytoplasm;cytoplasmic part;cytosol;extracellular matrix;extracellular membrane-bounded organelle;extracellular organelle;extracellular region part;extracellular vesicular exosome;intracellular membrane-bounded organelle;intracellular organelle;intracellular part;membrane;membrane-bounded organelle;membrane-bounded vesicle;mitochondrion;nucleus;organelle;plasma mem…	Carbon fixation in photosynthetic organisms;Glycolysis / Gluconeogenesis;Purine metabolism;Pyruvate metabolism;Type II diabetes mellitus	3D-structure;Acetylation;Allostericenzyme;Alternativesplicing;ATP-binding;Completeproteome;Cytoplasm;Directproteinsequencing;Glycolysis;Hydroxylation;Kinase;Magnesium;Metal-binding;Nucleotide-binding;Nucleus;Phosphoprotein;Polymorphism;Potassium;Proteomicsidentification;Pyruvate;Referenceproteome;Transferase;Ublconjugation	GO:0005975;GO:0005996;GO:0006006;GO:0006007;GO:0006066;GO:0006091;GO:0006096;GO:0008152;GO:0008219;GO:0009056;GO:0009987;GO:0012501;GO:0016052;GO:0016265;GO:0019318;GO:0019320;GO:0044237;GO:0044238;GO:0044262;GO:0044275;GO:0044281;GO:0044282;GO:0046164;GO:0046365	GO:0000166;GO:0000287;GO:0003823;GO:0003824;GO:0004743;GO:0005488;GO:0005524;GO:0016301;GO:0016740;GO:0016772;GO:0016773;GO:0017076;GO:0023023;GO:0023026;GO:0030554;GO:0030955;GO:0031420;GO:0032553;GO:0032555;GO:0032559;GO:0035639;GO:0043167;GO:0043169;GO:0046872	GO:0005634;GO:0005737;GO:0005739;GO:0005829;GO:0005886;GO:0005929;GO:0016020;GO:0031012;GO:0031982;GO:0031988;GO:0042995;GO:0043226;GO:0043227;GO:0043229;GO:0043230;GO:0043231;GO:0044421;GO:0044424;GO:0044444;GO:0044464;GO:0065010;GO:0070062	3	3	3	74	74	74	49897	0	28507	949780000	26	12	1.0581e+06	1.85172e+06
2720800	3008300	2428300	3190800	4633100	3564300	3849000	381540	670620	652040	1193500	624020	225630	821300	460370	765670	787520	819670	710010	487710	616930	746820	475300	773880	659850				biological regulation;cellular component organization;cellular component organization or biogenesis;cellular membrane organization;cellular process;defense response;defense response to bacterium;defense response to Gram-negative bacterium;defense response to Gram-positive bacterium;detection of bacterial lipoprotein;detection of biotic stimulus;detection of chemical stimulus;detection of molecule…	binding;cargo receptor activity;extracellular matrix binding;fibronectin binding;laminin binding;protein binding;receptor activity;scavenger receptor activity	cell part;cytoplasm;extracellular matrix;extracellular region part;extracellular space;intracellular;intracellular part;membrane		Alternativesplicing;Completeproteome;Cytoplasm;Developmentalprotein;Disulfidebond;Glycoprotein;Immunity;Innateimmunity;Receptor;Referenceproteome;Repeat;Secreted;Signal	GO:0001817;GO:0002237;GO:0002376;GO:0006810;GO:0006897;GO:0006898;GO:0006950;GO:0006952;GO:0006955;GO:0007275;GO:0009593;GO:0009595;GO:0009607;GO:0009617;GO:0009987;GO:0010033;GO:0010324;GO:0016043;GO:0016044;GO:0016192;GO:0032490;GO:0032493;GO:0032501;GO:0032502;GO:0032677;GO:0032879;GO:0032880;GO:0042221;GO:0042494;GO:0042742;GO:0045087;GO:0048519;GO:0048523;GO:0050707;GO:0050708;GO:0050709;GO:…	GO:0001968;GO:0004872;GO:0005044;GO:0005488;GO:0005515;GO:0038024;GO:0043236;GO:0050840	GO:0005615;GO:0005622;GO:0005737;GO:0016020;GO:0031012;GO:0044421;GO:0044424;GO:0044464	15	15	15	121	121	121	16574	0	32331	4224300000	61	155	744800	226093
3140000	3063700	2336300	1361600	1348000	1267200	1643400	1165400	1102300	1252700	2295800	1516800	1492400	2320800	1739600	1828300	1506800	1602900	1453900	2142300	1733100	1841300	2023800	1856100	1727700				aging;anatomical structure development;axon ensheathment;biological regulation;cell communication;cell-cell signaling;cellular component organization;cellular component organization or biogenesis;cellular process;central nervous system development;developmental process;ensheathment of neurons;immune response;immune system process;membrane organization;myelination;negative regulation of axonogenes…	structural constituent of myelin sheath;structural molecule activity	axon part;cell body;cell part;cell projection part;compact myelin;internode region of axon;intracellular membrane-bounded organelle;intracellular organelle;intracellular part;membrane;membrane-bounded organelle;neuronal cell body;nucleus;organelle;plasma membrane		3D-structure;Acetylation;Alternativesplicing;Autoimmuneencephalomyelitis;Cellmembrane;Citrullination;Completeproteome;Directproteinsequencing;Membrane;Methylation;Nucleus;Phosphoprotein;Proteomicsidentification;Referenceproteome	GO:0002376;GO:0006955;GO:0007154;GO:0007267;GO:0007268;GO:0007272;GO:0007417;GO:0007568;GO:0008366;GO:0009636;GO:0009719;GO:0009725;GO:0009987;GO:0010033;GO:0010035;GO:0010038;GO:0010721;GO:0010769;GO:0010975;GO:0016043;GO:0021762;GO:0022603;GO:0022604;GO:0023052;GO:0031344;GO:0031345;GO:0032502;GO:0032570;GO:0033993;GO:0034097;GO:0034612;GO:0042221;GO:0042552;GO:0045595;GO:0045596;GO:0045664;GO:…	GO:0005198;GO:0019911	GO:0005634;GO:0005886;GO:0016020;GO:0033267;GO:0033269;GO:0043025;GO:0043218;GO:0043226;GO:0043227;GO:0043229;GO:0043231;GO:0044297;GO:0044424;GO:0044463;GO:0044464	4	4	4	118	118	118	33117	0	357	2602000000	14	138	820295	1.93863e+06
544819968	464480000	489140000	280129984	283400000	309569984	299860000	596609984	579529984	620600000	346649984	309529984	491190016	902070016	682899968	803129984	473180000	460160000	561320000	574209984	580070016	607180032	531200000	464310016	498120000				acylglycerol catabolic process;acylglycerol metabolic process;alcohol metabolic process;biological regulation;carbohydrate homeostasis;catabolic process;cell surface receptor linked signaling pathway;cellular catabolic process;cellular chemical homeostasis;cellular component assembly;cellular component organization;cellular component organization or biogenesis;cellular glucose homeostasis;cellula…	binding;cholesterol binding;enzyme inhibitor activity;enzyme regulator activity;high-density lipoprotein particle receptor binding;lipase inhibitor activity;lipid binding;lipoprotein particle receptor binding;phospholipid binding;protein binding;receptor binding;steroid binding;sterol binding	cell part;chylomicron;cytoplasmic part;early endosome;endosome;extracellular membrane-bounded organelle;extracellular organelle;extracellular region;extracellular region part;extracellular space;extracellular vesicular exosome;high-density lipoprotein particle;intermediate-density lipoprotein particle;intracellular membrane-bounded organelle;intracellular organelle;intracellular part;macromolecul…	PPAR signaling pathway	3D-structure;Chylomicron;Completeproteome;Directproteinsequencing;Diseasemutation;Glycoprotein;Lipiddegradation;Lipidmetabolism;Lipidtransport;Lipoprotein;Polymorphism;Proteomicsidentification;Referenceproteome;Secreted;Sialicacid;Signal;Transport;VLDL	GO:0001523;GO:0001678;GO:0006066;GO:0006629;GO:0006638;GO:0006639;GO:0006641;GO:0006642;GO:0006662;GO:0006720;GO:0006721;GO:0006810;GO:0006869;GO:0006950;GO:0006952;GO:0006954;GO:0007165;GO:0007166;GO:0007186;GO:0007584;GO:0007602;GO:0007603;GO:0008152;GO:0008202;GO:0008203;GO:0009056;GO:0009314;GO:0009416;GO:0009581;GO:0009582;GO:0009583;GO:0009584;GO:0009605;GO:0009611;GO:0009628;GO:0009719;GO:…	GO:0004857;GO:0005102;GO:0005488;GO:0005496;GO:0005515;GO:0005543;GO:0008289;GO:0015485;GO:0030234;GO:0032934;GO:0055102;GO:0070325;GO:0070653	GO:0005576;GO:0005615;GO:0005768;GO:0005769;GO:0031982;GO:0031988;GO:0032991;GO:0032994;GO:0034358;GO:0034361;GO:0034363;GO:0034364;GO:0034366;GO:0034385;GO:0042627;GO:0043226;GO:0043227;GO:0043229;GO:0043230;GO:0043231;GO:0044421;GO:0044424;GO:0044444;GO:0044464;GO:0065010;GO:0070062	6	6	6	576	576	576	10852	0	25138	1755500000000000	6	352	1.13199e+08	7.38582e+07
0	91978	28972	73930	55537	152750	136880	99811	108100	76191	59078	749850	314950	500060	532640	578010	309930	227230	357260	33615	13119	36153	48218	139280	25901				activation of immune response;biological regulation;complement activation;complement activation, alternative pathway;defense response;humoral immune response;immune effector process;immune response;immune system process;innate immune response;macromolecule metabolic process;metabolic process;positive regulation of biological process;positive regulation of immune response;positive regulation of im…	binding;catalytic activity;complement binding;endopeptidase activity;hydrolase activity;peptidase activity;peptidase activity, acting on L-amino acid peptides;protein binding;serine hydrolase activity;serine-type endopeptidase activity;serine-type peptidase activity	blood microparticle;cell part;extracellular membrane-bounded organelle;extracellular organelle;extracellular region;extracellular region part;extracellular space;extracellular vesicular exosome;membrane;membrane-bounded organelle;membrane-bounded vesicle;organelle;plasma membrane;vesicle	Complement and coagulation cascades;Staphylococcus aureus infection	3D-structure;Alternativesplicing;Cleavageonpairofbasicresidues;Complementalternatepathway;Completeproteome;Directproteinsequencing;Diseasemutation;Disulfidebond;Glycation;Glycoprotein;Hemolyticuremicsyndrome;Hydrolase;Immunity;Innateimmunity;Polymorphism;Protease;Proteomicsidentification;Referenceproteome;Repeat;Secreted;Serineprotease;Signal;Sushi;Zymogen	GO:0002252;GO:0002253;GO:0002376;GO:0002673;GO:0002682;GO:0002684;GO:0002697;GO:0002920;GO:0006950;GO:0006952;GO:0006955;GO:0006956;GO:0006957;GO:0006959;GO:0008152;GO:0010468;GO:0019222;GO:0019538;GO:0030449;GO:0031347;GO:0032101;GO:0043170;GO:0044238;GO:0045087;GO:0048518;GO:0048583;GO:0048584;GO:0050727;GO:0050776;GO:0050778;GO:0050789;GO:0050896;GO:0051246;GO:0060255;GO:0065007;GO:0070613;GO:…	GO:0001848;GO:0003824;GO:0004175;GO:0004252;GO:0005488;GO:0005515;GO:0008233;GO:0008236;GO:0016787;GO:0017171;GO:0070011	GO:0005576;GO:0005615;GO:0005886;GO:0016020;GO:0031982;GO:0031988;GO:0043226;GO:0043227;GO:0043230;GO:0044421;GO:0044464;GO:0065010;GO:0070062;GO:0072562	11	11	11	103	103	103	12402	0	74509	1003100000	58	41	55156.8	179844
2815600	2296900	2139900	3366700	1527100	5134800	8657500	1181300	2707900	3407000	8169100	9926600	2168500	2476800	2938800	3041300	4231800	3932300	4546200	1918100	1532900	1657000	2807700	2498600	3053600				biological adhesion;biological regulation;blood coagulation;cell activation;cell adhesion;cell-cell adhesion;cell-matrix adhesion;cell-substrate adhesion;cellular component assembly;cellular component assembly at cellular level;cellular component organization;cellular component organization at cellular level;cellular component organization or biogenesis;cellular component organization or biogenes…	binding;cation binding;cell adhesion molecule binding;ion binding;metal ion binding;protein binding;receptor binding;structural molecule activity	blood microparticle;cell cortex;cell part;cell surface;cytoplasmic membrane-bounded vesicle;cytoplasmic membrane-bounded vesicle lumen;cytoplasmic part;cytoplasmic vesicle;cytoplasmic vesicle part;external side of plasma membrane;extracellular membrane-bounded organelle;extracellular organelle;extracellular region;extracellular region part;extracellular space;extracellular vesicular exosome;fibri…	Complement and coagulation cascades;Staphylococcus aureus infection	3D-structure;Alternativesplicing;Bloodcoagulation;Calcium;Coiledcoil;Completeproteome;Directproteinsequencing;Diseasemutation;Disulfidebond;Glycoprotein;Hemostasis;Isopeptidebond;Metal-binding;Polymorphism;Proteomicsidentification;Referenceproteome;Secreted;Signal;Sulfation	GO:0001775;GO:0002576;GO:0002791;GO:0002793;GO:0006461;GO:0006810;GO:0006887;GO:0007155;GO:0007160;GO:0007165;GO:0007596;GO:0007599;GO:0009966;GO:0009967;GO:0009987;GO:0010035;GO:0010038;GO:0010470;GO:0010627;GO:0010646;GO:0010647;GO:0010740;GO:0010941;GO:0016043;GO:0016192;GO:0016337;GO:0017157;GO:0019229;GO:0022407;GO:0022409;GO:0022603;GO:0022607;GO:0022610;GO:0023051;GO:0023056;GO:0030155;GO:…	GO:0005102;GO:0005198;GO:0005488;GO:0005515;GO:0043167;GO:0043169;GO:0046872;GO:0050839	GO:0005576;GO:0005577;GO:0005615;GO:0005886;GO:0005938;GO:0009897;GO:0009986;GO:0016020;GO:0016023;GO:0030141;GO:0031091;GO:0031093;GO:0031410;GO:0031974;GO:0031982;GO:0031983;GO:0031988;GO:0032991;GO:0034774;GO:0043226;GO:0043227;GO:0043229;GO:0043230;GO:0043231;GO:0043233;GO:0043234;GO:0044421;GO:0044422;GO:0044424;GO:0044425;GO:0044433;GO:0044444;GO:0044446;GO:0044459;GO:0044464;GO:0060205;GO:…	13	13	13	398	398	398	50322	0	16482	7443600000	26	117	2.47159e+06	1.14777e+06
22036000	23014000	17702000	36377000	56249000	56563000	41641000	247590000	219270000	172620000	191670000	168250000	180710000	95164000	88886000	85321000	71199000	90750000	40665000	24720000	19625000	25476000	34201000	31646000	33211000				aging;alcohol metabolic process;anatomical structure development;anatomical structure formation involved in morphogenesis;anatomical structure morphogenesis;angiogenesis;axon regeneration;axonogenesis;biological regulation;brain development;carbohydrate metabolic process;cell part morphogenesis;cell projection morphogenesis;cell projection organization;cellular carbohydrate metabolic process;cell…	binding;cholesterol binding;lipid binding;lipid transporter activity;steroid binding;sterol binding;substrate-specific transporter activity;transporter activity	cell body;cell part;cell projection;cytoplasmic part;cytosolic part;cytosolic ribosome;dendrite;endoplasmic reticulum;extracellular membrane-bounded organelle;extracellular organelle;extracellular region;extracellular region part;extracellular space;extracellular vesicular exosome;intracellular membrane-bounded organelle;intracellular non-membrane-bounded organelle;intracellular organelle;intrace…		3D-structure;Completeproteome;Directproteinsequencing;Disulfidebond;Glycoprotein;Lipid-binding;Polymorphism;Proteomicsidentification;Pyrrolidonecarboxylicacid;Referenceproteome;Secreted;Signal;Transport	GO:0000302;GO:0001525;GO:0001817;GO:0001818;GO:0001952;GO:0001953;GO:0002682;GO:0002683;GO:0002685;GO:0002686;GO:0005975;GO:0005996;GO:0006006;GO:0006066;GO:0006629;GO:0006810;GO:0006869;GO:0006950;GO:0006979;GO:0007162;GO:0007409;GO:0007420;GO:0007568;GO:0008152;GO:0008285;GO:0009611;GO:0009653;GO:0009888;GO:0009892;GO:0009966;GO:0009968;GO:0009987;GO:0010035;GO:0010605;GO:0010640;GO:0010642;GO:…	GO:0005215;GO:0005319;GO:0005488;GO:0005496;GO:0008289;GO:0015485;GO:0022892;GO:0032934	GO:0005576;GO:0005615;GO:0005783;GO:0005840;GO:0022626;GO:0030425;GO:0030529;GO:0031982;GO:0031988;GO:0032991;GO:0042995;GO:0043005;GO:0043025;GO:0043226;GO:0043227;GO:0043228;GO:0043229;GO:0043230;GO:0043231;GO:0043232;GO:0044297;GO:0044421;GO:0044424;GO:0044444;GO:0044445;GO:0044464;GO:0048471;GO:0065010;GO:0070062	7	7	7	265	265	265	24158	0	18923	32981000000	11	237	1.61396e+07	1.09499e+07
26485000	25078000	24870000	17023000	26249000	25178000	26818000	276420000	263870000	244570000	231660000	283310016	205300000	330009984	290460000	289360000	241670000	247990000	229340000	177360000	172310000	178130000	204860000	206400000	186210000				anatomical structure homeostasis;anion transport;behavior;bile acid and bile salt transport;bile acid metabolic process;biological regulation;blood coagulation;carboxylic acid metabolic process;carboxylic acid transport;cell activation;cell communication;cell killing;cellular component organization;cellular component organization or biogenesis;cellular ketone metabolic process;cellular macromolec…	antioxidant activity;binding;carboxylic acid binding;cation binding;chaperone binding;cofactor binding;copper ion binding;DNA binding;drug binding;fatty acid binding;ion binding;lipid binding;metal ion binding;monocarboxylic acid binding;nucleic acid binding;protein binding;pyridoxal phosphate binding;toxin binding;transition metal ion binding;vitamin B6 binding;vitamin binding;zinc ion binding	basement membrane;blood microparticle;cell part;cytoplasmic membrane-bounded vesicle lumen;cytoplasmic part;cytoplasmic vesicle part;extracellular matrix part;extracellular membrane-bounded organelle;extracellular organelle;extracellular region;extracellular region part;extracellular space;extracellular vesicular exosome;intracellular membrane-bounded organelle;intracellular organelle;intracellul…		3D-structure;Alternativesplicing;Cleavageonpairofbasicresidues;Completeproteome;Copper;Directproteinsequencing;Diseasemutation;Disulfidebond;Glycation;Glycoprotein;Lipid-binding;Metal-binding;Phosphoprotein;Polymorphism;Proteomicsidentification;Referenceproteome;Repeat;Secreted;Signal;Zinc	GO:0001775;GO:0001894;GO:0001895;GO:0001897;GO:0001906;GO:0001907;GO:0002576;GO:0006082;GO:0006629;GO:0006810;GO:0006811;GO:0006820;GO:0006887;GO:0006897;GO:0006898;GO:0006950;GO:0007154;GO:0007584;GO:0007596;GO:0007599;GO:0007610;GO:0007622;GO:0007623;GO:0008152;GO:0008202;GO:0008206;GO:0009267;GO:0009605;GO:0009987;GO:0009991;GO:0010033;GO:0010035;GO:0010038;GO:0010324;GO:0010941;GO:0015711;GO:…	GO:0003676;GO:0003677;GO:0005488;GO:0005504;GO:0005507;GO:0005515;GO:0008144;GO:0008270;GO:0008289;GO:0015643;GO:0016209;GO:0019842;GO:0030170;GO:0031406;GO:0033293;GO:0043167;GO:0043169;GO:0046872;GO:0046914;GO:0048037;GO:0051087;GO:0070279	GO:0005576;GO:0005604;GO:0005615;GO:0005634;GO:0031093;GO:0031974;GO:0031982;GO:0031983;GO:0031988;GO:0032991;GO:0034774;GO:0043226;GO:0043227;GO:0043229;GO:0043230;GO:0043231;GO:0043233;GO:0043234;GO:0044420;GO:0044421;GO:0044422;GO:0044424;GO:0044433;GO:0044444;GO:0044446;GO:0044464;GO:0060205;GO:0065010;GO:0070062;GO:0072562	58	58	52	826	826	77	69366	0	32331	4528400000000000	37	2344	3.39614e+06	4.63307e+07
90928	121640	93549	330440	348810	405270	159260	31658	0	0	0	0	0	30819	30604	297510	241020	0	14299	0	0	0	0	0	0				activation of immune response;biological regulation;cell killing;complement activation;complement activation, alternative pathway;complement activation, classical pathway;cytolysis by symbiont of host cells;cytolysis in other organism;cytolysis in other organism involved in symbiotic interaction;defense response;disruption by symbiont of host cells;disruption of cells of other organism involved i…		blood microparticle;cell part;cytoplasm;extracellular membrane-bounded organelle;extracellular organelle;extracellular region;extracellular region part;extracellular vesicular exosome;integral to membrane;integral to plasma membrane;intracellular part;intrinsic to membrane;intrinsic to plasma membrane;macromolecular complex;membrane;membrane attack complex;membrane part;membrane-bounded organelle…	Amoebiasis;Complement and coagulation cascades;Prion diseases;Systemic lupus erythematosus	Age-relatedmaculardegeneration;Cellmembrane;Complementalternatepathway;Complementpathway;Completeproteome;Cytolysis;Directproteinsequencing;Diseasemutation;Disulfidebond;EGF-likedomain;Glycoprotein;Immunity;Innateimmunity;Membrane;Membraneattackcomplex;Phosphoprotein;Polymorphism;Referenceproteome;Secreted;Signal;Transmembrane;Transmembranebetastrand	GO:0001897;GO:0001906;GO:0001907;GO:0002252;GO:0002253;GO:0002376;GO:0002673;GO:0002682;GO:0002684;GO:0002697;GO:0002920;GO:0006950;GO:0006952;GO:0006955;GO:0006956;GO:0006957;GO:0006958;GO:0006959;GO:0008152;GO:0010468;GO:0019222;GO:0019538;GO:0019836;GO:0030449;GO:0031347;GO:0031640;GO:0032101;GO:0035821;GO:0043170;GO:0044003;GO:0044004;GO:0044179;GO:0044238;GO:0044419;GO:0045087;GO:0048518;GO:…		GO:0005576;GO:0005579;GO:0005737;GO:0005886;GO:0005887;GO:0016020;GO:0016021;GO:0031224;GO:0031226;GO:0031982;GO:0031988;GO:0032991;GO:0043226;GO:0043227;GO:0043230;GO:0043234;GO:0044421;GO:0044424;GO:0044425;GO:0044459;GO:0044464;GO:0046930;GO:0065010;GO:0070062;GO:0072562	2	2	2	38	38	38	61998	0	18726	121070000	27	8	134854	187862
0	0	0	0	0	0	105390	1987300	1425700	292240	1020800	1225500	1315300	434410	858090	480380	290090	1082700	1021300	121790	327590	479630	193450	536650	467870				establishment of localization;fat-soluble vitamin metabolic process;lipid metabolic process;metabolic process;primary metabolic process;small molecule metabolic process;steroid metabolic process;transport;vitamin D metabolic process;vitamin metabolic process;vitamin transport	actin binding;binding;cytoskeletal protein binding;lipid binding;protein binding;steroid binding;transmembrane transporter activity;transporter activity;vitamin binding;vitamin D binding;vitamin transporter activity	blood microparticle;cell part;cytoplasmic part;cytosol;extracellular membrane-bounded organelle;extracellular organelle;extracellular region;extracellular region part;extracellular space;extracellular vesicular exosome;intracellular organelle lumen;intracellular organelle part;intracellular part;lysosomal lumen;membrane-bounded organelle;membrane-bounded vesicle;membrane-enclosed lumen;organelle;…		3D-structure;Actin-binding;Alternativesplicing;Completeproteome;Directproteinsequencing;Disulfidebond;Glycoprotein;Polymorphism;Proteomicsidentification;Referenceproteome;Repeat;Secreted;Signal;Transport;VitaminD	GO:0006629;GO:0006766;GO:0006775;GO:0006810;GO:0008152;GO:0008202;GO:0042359;GO:0044238;GO:0044281;GO:0051180;GO:0051234	GO:0003779;GO:0005215;GO:0005488;GO:0005496;GO:0005499;GO:0005515;GO:0008092;GO:0008289;GO:0019842;GO:0022857;GO:0051183	GO:0005576;GO:0005615;GO:0005775;GO:0005829;GO:0031974;GO:0031982;GO:0031988;GO:0043202;GO:0043226;GO:0043227;GO:0043230;GO:0043233;GO:0044421;GO:0044422;GO:0044424;GO:0044437;GO:0044444;GO:0044446;GO:0044464;GO:0065010;GO:0070013;GO:0070062;GO:0072562	3	3	3	118	118	118	38797	0	18306	349570000	20	7	39833.7	151921
101640	56831	81588	180720	224110	155250	139680	98518	51242	0	76941	580260	70305	190730	105760	188180	114510	240570	230390	84711	113800	64505	173530	145180	245410				biological adhesion;biological regulation;blood coagulation;cell activation;cell adhesion;cellular process;coagulation;establishment of localization;establishment of localization in cell;exocytosis;hemostasis;multicellular organismal process;platelet activation;platelet degranulation;regulation of biological quality;regulation of body fluid levels;secretion;secretion by cell;transport;vesicle-med…		cell part;cytoplasmic membrane-bounded vesicle lumen;cytoplasmic part;cytoplasmic vesicle part;extracellular region;intracellular organelle part;intracellular part;membrane-enclosed lumen;organelle lumen;organelle part;platelet alpha granule lumen;secretory granule lumen;vesicle lumen		Alternativesplicing;Coiledcoil;Completeproteome;Directproteinsequencing;Disulfidebond;EGF-likedomain;Glycoprotein;Polymorphism;Proteomicsidentification;Referenceproteome;Secreted;Signal	GO:0001775;GO:0002576;GO:0006810;GO:0006887;GO:0007155;GO:0007596;GO:0007599;GO:0009987;GO:0016192;GO:0022610;GO:0030168;GO:0032501;GO:0032940;GO:0046903;GO:0050817;GO:0050878;GO:0051234;GO:0051649;GO:0065007;GO:0065008		GO:0005576;GO:0031093;GO:0031974;GO:0031983;GO:0034774;GO:0043233;GO:0044422;GO:0044424;GO:0044433;GO:0044444;GO:0044446;GO:0044464;GO:0060205	4	4	4	52	52	52	11075	0	24553	391690000	58	8	58502.4	85150
1116800	1540100	1529600	1059700	628830	1786800	968190	396970	303870	264170	106040	109330	68604	96005	0	0	222060	416090	271750	315540	279390	359010	526740	398860	336380				amine transport;apoptosis;biological regulation;biosynthetic process;blood coagulation;cell activation;cell death;cellular biosynthetic process;cellular component assembly;cellular component assembly at cellular level;cellular component organization;cellular component organization at cellular level;cellular component organization or biogenesis;cellular component organization or biogenesis at cell…	binding;enzyme binding;identical protein binding;kinase binding;protein binding;protein kinase binding;transcription factor binding;ubiquitin protein ligase binding	adherens junction;anchoring junction;blood microparticle;cell junction;cell leading edge;cell part;cell-substrate adherens junction;cell-substrate junction;cytoplasm;cytoplasmic membrane-bounded vesicle;cytoplasmic part;cytoplasmic vesicle;cytoplasmic vesicle membrane;cytoplasmic vesicle part;cytoskeletal part;cytosol;extracellular membrane-bounded organelle;extracellular organelle;extracellular …	Cell cycle;Neurotrophin signaling pathway;Oocyte meiosis	3D-structure;Acetylation;Alternativesplicing;Completeproteome;Cytoplasm;Directproteinsequencing;Phosphoprotein;Proteomicsidentification;Referenceproteome	GO:0001775;GO:0001821;GO:0002441;GO:0002553;GO:0006139;GO:0006352;GO:0006367;GO:0006605;GO:0006626;GO:0006807;GO:0006810;GO:0006839;GO:0006886;GO:0006915;GO:0006996;GO:0007030;GO:0007165;GO:0007264;GO:0007596;GO:0007599;GO:0008152;GO:0008219;GO:0009058;GO:0009914;GO:0009987;GO:0010467;GO:0010817;GO:0010941;GO:0012501;GO:0015031;GO:0015837;GO:0016043;GO:0016070;GO:0016265;GO:0017038;GO:0022607;GO:…	GO:0005488;GO:0005515;GO:0008134;GO:0019899;GO:0019900;GO:0019901;GO:0031625;GO:0042802	GO:0000323;GO:0005615;GO:0005634;GO:0005654;GO:0005737;GO:0005739;GO:0005764;GO:0005773;GO:0005829;GO:0005912;GO:0005924;GO:0005925;GO:0012506;GO:0014069;GO:0016020;GO:0016023;GO:0030054;GO:0030055;GO:0030659;GO:0031090;GO:0031252;GO:0031410;GO:0031982;GO:0031988;GO:0032991;GO:0042470;GO:0042629;GO:0043226;GO:0043227;GO:0043229;GO:0043230;GO:0043231;GO:0043234;GO:0044421;GO:0044422;GO:0044424;GO:…	6	6	5	268	268	228	28036	0	86745	450130000	14	22	401592	1.4171e+06
124610	111570	94584	233880	200230	225220	295900	137450	193990	116010	411060	375810	270710	306630	220760	189180	155520	230040	242760	0	75831	0	118240	181970	164460				activation of immune response;biological regulation;carbohydrate metabolic process;cellular carbohydrate metabolic process;cellular macromolecule metabolic process;cellular metabolic process;cellular process;cellular protein metabolic process;complement activation;complement activation, alternative pathway;defense response;defense response to bacterium;glycosylation;humoral immune response;immune…		cell part;cytoplasmic part;endoplasmic reticulum lumen;endoplasmic reticulum part;extracellular region;extracellular region part;extracellular space;intracellular organelle lumen;intracellular organelle part;intracellular part;membrane-enclosed lumen;organelle lumen;organelle part		3D-structure;Complementalternatepathway;Completeproteome;Diseasemutation;Disulfidebond;Glycoprotein;Immunity;Innateimmunity;Polymorphism;Proteomicsidentification;Referenceproteome;Repeat;Secreted;Signal	GO:0002252;GO:0002253;GO:0002376;GO:0002673;GO:0002682;GO:0002684;GO:0002697;GO:0002920;GO:0005975;GO:0006464;GO:0006486;GO:0006493;GO:0006950;GO:0006952;GO:0006955;GO:0006956;GO:0006957;GO:0006959;GO:0008152;GO:0009607;GO:0009617;GO:0009987;GO:0010468;GO:0019222;GO:0019538;GO:0030449;GO:0031347;GO:0032101;GO:0042742;GO:0043170;GO:0043412;GO:0043413;GO:0043687;GO:0044237;GO:0044238;GO:0044260;GO:…		GO:0005576;GO:0005615;GO:0005788;GO:0031974;GO:0043233;GO:0044421;GO:0044422;GO:0044424;GO:0044432;GO:0044444;GO:0044446;GO:0044464;GO:0070013	2	2	2	7	7	7	51276	0	11901	176630000	19	7	74988.9	124396
293670	314510	266080	223980	142740	297900	345250	328290	265810	322210	302930	299810	310020	154780	217640	150820	117090	174910	259170	208950	235220	249050	81740	121090	200290				anatomical structure morphogenesis;axis elongation;axon regeneration;axonogenesis;biological adhesion;biological regulation;branch elongation of an epithelium;bud outgrowth involved in lung branching;cell adhesion;cell communication;cell differentiation;cell part morphogenesis;cell projection morphogenesis;cell projection organization;cell-cell signaling;cellular component morphogenesis;cellular …	binding;protein binding;syndecan binding	adherens junction;anchoring junction;basement membrane;cell junction;cell part;cell-substrate adherens junction;cell-substrate junction;extracellular matrix;extracellular matrix part;extracellular region;extracellular region part;extracellular space;focal adhesion;interstitial matrix;membrane;proteinaceous extracellular matrix	ECM-receptor interaction;Focal adhesion	3D-structure;Alternativesplicing;Celladhesion;Coiledcoil;Completeproteome;Deafness;Directproteinsequencing;Diseasemutation;Disulfidebond;EGF-likedomain;Extracellularmatrix;Glycoprotein;Non-syndromicdeafness;Phosphoprotein;Polymorphism;Proteomicsidentification;Referenceproteome;Repeat;Secreted;Signal	GO:0001649;GO:0002009;GO:0003006;GO:0003401;GO:0006950;GO:0007154;GO:0007155;GO:0007162;GO:0007267;GO:0007409;GO:0007528;GO:0007584;GO:0008284;GO:0009605;GO:0009611;GO:0009612;GO:0009628;GO:0009653;GO:0009719;GO:0009725;GO:0009887;GO:0009893;GO:0009987;GO:0009991;GO:0010033;GO:0010468;GO:0010604;GO:0010628;GO:0014012;GO:0016043;GO:0019222;GO:0022414;GO:0022610;GO:0023052;GO:0030030;GO:0030154;GO:…	GO:0005488;GO:0005515;GO:0045545	GO:0005576;GO:0005578;GO:0005604;GO:0005614;GO:0005615;GO:0005912;GO:0005924;GO:0005925;GO:0016020;GO:0030054;GO:0030055;GO:0031012;GO:0044420;GO:0044421;GO:0044464;GO:0070161	7	7	7	41	41	41	20114	0	45529	741750000	85	48	67460.8	89406.5
12108	17940	27247	79448	40081	44643	31956	176490	82615	98344	133430	263070	105540	23284	291740	302390	244690	231440	123390	149300	151680	27109	10623	59222	0				biological regulation;cation homeostasis;cation transport;cellular cation homeostasis;cellular chemical homeostasis;cellular homeostasis;cellular ion homeostasis;cellular iron ion homeostasis;cellular metal ion homeostasis;cellular process;chemical homeostasis;copper ion transport;establishment of localization;homeostatic process;ion homeostasis;ion transport;iron ion homeostasis;metal ion homeos…	binding;catalytic activity;cation binding;chaperone binding;copper ion binding;ferroxidase activity;ion binding;metal ion binding;oxidoreductase activity;oxidoreductase activity, oxidizing metal ions;oxidoreductase activity, oxidizing metal ions, oxygen as acceptor;protein binding;transition metal ion binding	blood microparticle;cell part;cytoplasmic part;extracellular membrane-bounded organelle;extracellular organelle;extracellular region;extracellular region part;extracellular space;extracellular vesicular exosome;intracellular organelle part;intracellular part;lysosomal membrane;membrane;membrane-bounded organelle;membrane-bounded vesicle;organelle;organelle membrane;organelle part;vacuolar membran…	Porphyrin and chlorophyll metabolism	3D-structure;Completeproteome;Copper;Coppertransport;Directproteinsequencing;Disulfidebond;Glycoprotein;Iontransport;Metal-binding;Oxidoreductase;Polymorphism;Proteomicsidentification;Referenceproteome;Repeat;Secreted;Signal;Transport	GO:0000041;GO:0006810;GO:0006811;GO:0006812;GO:0006825;GO:0006873;GO:0006875;GO:0006879;GO:0009987;GO:0019725;GO:0030001;GO:0030003;GO:0042592;GO:0048878;GO:0050801;GO:0051234;GO:0055065;GO:0055072;GO:0055080;GO:0055082;GO:0055085;GO:0065007;GO:0065008	GO:0003824;GO:0004322;GO:0005488;GO:0005507;GO:0005515;GO:0016491;GO:0016722;GO:0016724;GO:0043167;GO:0043169;GO:0046872;GO:0046914;GO:0051087	GO:0005576;GO:0005615;GO:0005765;GO:0005774;GO:0016020;GO:0031090;GO:0031982;GO:0031988;GO:0043226;GO:0043227;GO:0043230;GO:0044421;GO:0044422;GO:0044424;GO:0044437;GO:0044444;GO:0044446;GO:0044464;GO:0065010;GO:0070062;GO:0072562	6	6	6	8	8	8	10882	0	48012	326070000	45	11	22243.9	225747
97821	45508	110620	0	0	0	0	141830	83049	51003	39085	134570	122770	82642	96759	130380	319640	89446	0	36064	50193	37089	101500	58476	121670				acute inflammatory response;acute-phase response;biological regulation;blood coagulation;blood coagulation, intrinsic pathway;calcium ion homeostasis;cation homeostasis;cell activation;cell migration;cell motility;cell surface receptor linked signaling pathway;cellular calcium ion homeostasis;cellular cation homeostasis;cellular chemical homeostasis;cellular component movement;cellular divalent i…	binding;calcium ion binding;catalytic activity;cation binding;endopeptidase activity;growth factor activity;hydrolase activity;ion binding;metal ion binding;molecular transducer activity;peptidase activity;peptidase activity, acting on L-amino acid peptides;protein binding;receptor activity;receptor binding;serine hydrolase activity;serine-type endopeptidase activity;serine-type peptidase activit…	blood microparticle;cell part;cytoplasmic part;endoplasmic reticulum lumen;endoplasmic reticulum part;extracellular membrane-bounded organelle;extracellular organelle;extracellular region;extracellular region part;extracellular space;extracellular vesicular exosome;Golgi apparatus part;Golgi lumen;intracellular organelle lumen;intracellular organelle part;intracellular part;membrane;membrane-boun…	Complement and coagulation cascades;Neuroactive ligand-receptor interaction;Regulation of actin cytoskeleton	3D-structure;Acutephase;Bloodcoagulation;Calcium;Cleavageonpairofbasicresidues;Completeproteome;Directproteinsequencing;Diseasemutation;Disulfidebond;Gamma-carboxyglutamicacid;Glycoprotein;Hemostasis;Hydrolase;Kringle;Pharmaceutical;Polymorphism;Protease;Proteomicsidentification;Referenceproteome;Repeat;Secreted;Serineprotease;Signal;Thrombophilia;Zymogen	GO:0001558;GO:0001775;GO:0001932;GO:0001934;GO:0002376;GO:0002526;GO:0006464;GO:0006508;GO:0006873;GO:0006874;GO:0006875;GO:0006928;GO:0006950;GO:0006952;GO:0006953;GO:0006954;GO:0007165;GO:0007166;GO:0007275;GO:0007596;GO:0007597;GO:0007599;GO:0008152;GO:0008284;GO:0008360;GO:0009611;GO:0009889;GO:0009891;GO:0009892;GO:0009893;GO:0009966;GO:0009967;GO:0009987;GO:0010468;GO:0010522;GO:0010524;GO:…	GO:0003824;GO:0004175;GO:0004252;GO:0004871;GO:0004872;GO:0005102;GO:0005488;GO:0005509;GO:0005515;GO:0008083;GO:0008233;GO:0008236;GO:0016787;GO:0017171;GO:0038023;GO:0043167;GO:0043169;GO:0046872;GO:0060089;GO:0070011;GO:0070053	GO:0005576;GO:0005615;GO:0005788;GO:0005796;GO:0005886;GO:0016020;GO:0031974;GO:0031982;GO:0031988;GO:0043226;GO:0043227;GO:0043230;GO:0043233;GO:0044421;GO:0044422;GO:0044424;GO:0044431;GO:0044432;GO:0044444;GO:0044446;GO:0044464;GO:0065010;GO:0070013;GO:0070062;GO:0072562	6	6	6	151	151	151	65408	0	39139	356450000	30	13	49436.6	253254
569650	562950	627700	32014	88922	162150	126720	89533	73874	101970	74827	89553	99198	340960	107750	368150	245810	33522	105360	319860	394420	324800	225750	333840	312970				anatomical structure development;axon guidance;biological regulation;biosynthetic process;cell communication;cell cycle phase;cell cycle process;cell development;cell-cell signaling;cellular biosynthetic process;cellular component disassembly;cellular component disassembly at cellular level;cellular component organization;cellular component organization at cellular level;cellular component organi…	adenyl nucleotide binding;adenyl ribonucleotide binding;antigen binding;ATP binding;ATPase activity;ATPase activity, coupled;binding;C3HC4-type RING finger domain binding;catalytic activity;enzyme binding;glycolipid binding;G-protein-coupled receptor binding;heat shock protein binding;hydrolase activity;hydrolase activity, acting on acid anhydrides;hydrolase activity, acting on acid anhydrides, i…	adherens junction;anchoring junction;blood microparticle;cell junction;cell part;cell surface;cell-substrate adherens junction;cell-substrate junction;chromosomal part;clathrin coated vesicle membrane;clathrin sculpted gamma-aminobutyric acid transport vesicle membrane;coated vesicle membrane;cytoplasmic membrane-bounded vesicle;cytoplasmic part;cytoplasmic vesicle;cytoplasmic vesicle membrane;cy…	Antigen processing and presentation;Endocytosis;MAPK signaling pathway;Measles;Protein processing in endoplasmic reticulum;Spliceosome;Toxoplasmosis	3D-structure;Acetylation;Alternativesplicing;ATP-binding;Cellmembrane;Chaperone;Completeproteome;Cytoplasm;Directproteinsequencing;Host-virusinteraction;Membrane;Methylation;mRNAprocessing;mRNAsplicing;Nucleotide-binding;Nucleus;Phosphoprotein;Polymorphism;Proteomicsidentification;Referenceproteome;Repressor;Spliceosome;Stressresponse;Transcription;Transcriptionregulation;Ublconjugation	GO:0000079;GO:0000375;GO:0000377;GO:0000398;GO:0001505;GO:0001932;GO:0003006;GO:0006139;GO:0006351;GO:0006355;GO:0006396;GO:0006397;GO:0006457;GO:0006458;GO:0006807;GO:0006810;GO:0006836;GO:0006892;GO:0006935;GO:0006950;GO:0006986;GO:0006996;GO:0007126;GO:0007127;GO:0007140;GO:0007141;GO:0007154;GO:0007267;GO:0007268;GO:0007269;GO:0007281;GO:0007286;GO:0007411;GO:0008152;GO:0008380;GO:0009058;GO:…	GO:0000166;GO:0001664;GO:0003823;GO:0003824;GO:0005102;GO:0005488;GO:0005515;GO:0005524;GO:0008289;GO:0016462;GO:0016787;GO:0016817;GO:0016818;GO:0016887;GO:0017076;GO:0017111;GO:0019899;GO:0019904;GO:0023023;GO:0023026;GO:0030554;GO:0031072;GO:0031625;GO:0032553;GO:0032555;GO:0032559;GO:0035639;GO:0042623;GO:0051082;GO:0051861;GO:0055131	GO:0000795;GO:0000974;GO:0001673;GO:0005615;GO:0005622;GO:0005634;GO:0005654;GO:0005681;GO:0005730;GO:0005739;GO:0005829;GO:0005886;GO:0005912;GO:0005924;GO:0005925;GO:0009986;GO:0012506;GO:0016020;GO:0016023;GO:0030054;GO:0030055;GO:0030529;GO:0030659;GO:0030662;GO:0030665;GO:0031090;GO:0031410;GO:0031982;GO:0031988;GO:0032991;GO:0042470;GO:0043073;GO:0043226;GO:0043227;GO:0043228;GO:0043229;GO:…	6	6	5	134	134	113	68805	0	47416	507710000	32	22	262659	226455
817210	844230	668460	0	153120	150300	229020	206090	0	0	0	0	0	163180	0	0	0	0	0	0	319800	312920	0	0	163030				actin cytoskeleton organization;actin filament depolymerization;actin filament organization;actin filament-based process;actin polymerization or depolymerization;actomyosin structure organization;ameboidal cell migration;anatomical structure homeostasis;anatomical structure morphogenesis;axon guidance;biological regulation;blood coagulation;cell activation;cell cycle cytokinesis;cell cycle proces…		actin cytoskeleton;adherens junction;anchoring junction;cell cortex part;cell junction;cell part;cell projection membrane;cell projection part;cell-cell junction;cell-substrate adherens junction;cell-substrate junction;contractile fiber part;cortical actin cytoskeleton;cortical cytoskeleton;cytoplasm;cytoplasmic part;cytoskeletal part;cytoskeleton;extracellular membrane-bounded organelle;extracel…	Axon guidance;Fc gamma R-mediated phagocytosis;Regulation of actin cytoskeleton	3D-structure;Acetylation;Actin-binding;Alternativesplicing;Cellmembrane;Cellprojection;Completeproteome;Cytoplasm;Cytoskeleton;Directproteinsequencing;Diseasemutation;Membrane;Nemalinemyopathy;Nucleus;Phosphoprotein;Polymorphism;Proteomicsidentification;Referenceproteome	GO:0000281;GO:0000910;GO:0001101;GO:0001667;GO:0001755;GO:0001775;GO:0001842;GO:0002009;GO:0002376;GO:0002576;GO:0006464;GO:0006468;GO:0006605;GO:0006606;GO:0006793;GO:0006796;GO:0006810;GO:0006886;GO:0006887;GO:0006913;GO:0006928;GO:0006935;GO:0006950;GO:0006952;GO:0006955;GO:0006996;GO:0007010;GO:0007015;GO:0007163;GO:0007165;GO:0007166;GO:0007167;GO:0007169;GO:0007264;GO:0007265;GO:0007266;GO:…		GO:0005615;GO:0005634;GO:0005737;GO:0005856;GO:0005911;GO:0005912;GO:0005924;GO:0005925;GO:0015629;GO:0016020;GO:0016363;GO:0030054;GO:0030055;GO:0030863;GO:0030864;GO:0031253;GO:0031256;GO:0031258;GO:0031674;GO:0031982;GO:0031988;GO:0032587;GO:0043226;GO:0043227;GO:0043228;GO:0043229;GO:0043230;GO:0043231;GO:0043232;GO:0044421;GO:0044422;GO:0044424;GO:0044425;GO:0044428;GO:0044430;GO:0044444;GO:…	2	2	2	145	145	145	17777	0	13512	104130000	10	8	354837	524119
588370	590450	480500	199970	0	0	0	0	232480	236840	99457	0	72516	0	0	0	74931	0	0	359590	53086	374900	51996	38552	370690				cell division;cellular component assembly;cellular component assembly at cellular level;cellular component organization;cellular component organization at cellular level;cellular component organization or biogenesis;cellular component organization or biogenesis at cellular level;cellular macromolecular complex assembly;cellular macromolecular complex subunit organization;cellular macromolecule me…	binding;catalytic activity;GTP binding;GTPase activity;guanyl nucleotide binding;guanyl ribonucleotide binding;hydrolase activity;hydrolase activity, acting on acid anhydrides;hydrolase activity, acting on acid anhydrides, in phosphorus-containing anhydrides;nucleoside-triphosphatase activity;nucleotide binding;purine nucleotide binding;purine ribonucleoside triphosphate binding;purine ribonucleo…	cell part;cytoplasm;cytoplasmic microtubule;cytoplasmic part;cytoskeletal part;intracellular membrane-bounded organelle;intracellular organelle;intracellular organelle part;intracellular part;macromolecular complex;membrane-bounded organelle;microtubule;nucleus;organelle;organelle part;protein complex;vesicle	Gap junction;Pathogenic Escherichia coli infection;Phagosome	Acetylation;Completeproteome;Cytoplasm;Cytoskeleton;Directproteinsequencing;GTP-binding;Microtubule;Nitration;Nucleotide-binding;Phosphoprotein;Proteomicsidentification;Referenceproteome	GO:0006457;GO:0006458;GO:0006461;GO:0006810;GO:0007017;GO:0008152;GO:0009987;GO:0016043;GO:0019538;GO:0022607;GO:0030705;GO:0034621;GO:0034622;GO:0043170;GO:0043623;GO:0043933;GO:0044237;GO:0044238;GO:0044260;GO:0044267;GO:0046907;GO:0051084;GO:0051234;GO:0051258;GO:0051301;GO:0051649;GO:0065003;GO:0071822;GO:0071840;GO:0071841;GO:0071842;GO:0071844	GO:0000166;GO:0003824;GO:0003924;GO:0005198;GO:0005200;GO:0005488;GO:0005525;GO:0016462;GO:0016787;GO:0016817;GO:0016818;GO:0017076;GO:0017111;GO:0019001;GO:0032553;GO:0032555;GO:0032561;GO:0035639	GO:0005634;GO:0005737;GO:0005874;GO:0005881;GO:0031982;GO:0032991;GO:0043226;GO:0043227;GO:0043229;GO:0043231;GO:0043234;GO:0044422;GO:0044424;GO:0044430;GO:0044444;GO:0044446;GO:0044464	12	1	0	356	29	0	49895	0	98269	198780000	21	10	280424	453259
1178400	822970	648040	646220	488270	511820	1056400	122780	0	85849	0	0	0	623690	455610	412820	0	0	0	566870	655580	530750	662890	0	550140				actin filament-based movement;actin filament-based process;actin-mediated cell contraction;actin-myosin filament sliding;biological regulation;cellular component movement;cellular process;multicellular organismal process;muscle contraction;muscle filament sliding;muscle system process;regulation of biological process;regulation of multicellular organismal process;regulation of muscle contraction;…	binding;calcium ion binding;catalytic activity;cation binding;ion binding;kinase activity;metal ion binding;transferase activity;transferase activity, transferring phosphorus-containing groups	cell part;contractile fiber part;cytoplasmic part;cytoskeletal part;cytosol;extracellular membrane-bounded organelle;extracellular organelle;extracellular region part;extracellular vesicular exosome;intracellular organelle part;intracellular part;macromolecular complex;membrane-bounded organelle;membrane-bounded vesicle;organelle;organelle part;protein complex;troponin complex;vesicle	Alzheimer's disease;Calcium signaling pathway;Gastric acid secretion;Glioma;GnRH signaling pathway;Insulin signaling pathway;ko05152;Long-term potentiation;Melanogenesis;Neurotrophin signaling pathway;Olfactory transduction;Oocyte meiosis;Phosphatidylinositol signaling system;Phototransduction;Phototransduction - fly;Plant-pathogen interaction;Salivary secretion;Vascular smooth muscle contraction	3D-structure;Acetylation;Calcium;Completeproteome;Directproteinsequencing;Kinase;Metal-binding;Muscleprotein;Proteomicsidentification;Referenceproteome;Repeat;Transferase	GO:0003008;GO:0003009;GO:0003012;GO:0006928;GO:0006936;GO:0006937;GO:0006941;GO:0009987;GO:0030029;GO:0030048;GO:0030049;GO:0032501;GO:0033275;GO:0044057;GO:0050789;GO:0051239;GO:0065007;GO:0070252;GO:0090257	GO:0003824;GO:0005488;GO:0005509;GO:0016301;GO:0016740;GO:0016772;GO:0043167;GO:0043169;GO:0046872	GO:0005829;GO:0005861;GO:0031982;GO:0031988;GO:0032991;GO:0043226;GO:0043227;GO:0043230;GO:0043234;GO:0044421;GO:0044422;GO:0044424;GO:0044430;GO:0044444;GO:0044446;GO:0044449;GO:0044464;GO:0065010;GO:0070062	2	2	2	308	308	308	7372	0	11464	94094000	5	2	266971	694457
7450800	8666800	7345000	3565700	2810000	4514500	4324300	4656200	4728700	4777600	1618900	409920	2367200	6016600	5399000	5503700	4018300	4336900	3676000	5058800	5573100	5484800	4740000	4418800	5043900				actin cytoskeleton organization;actin filament-based process;actomyosin structure organization;adherens junction organization;anatomical structure homeostasis;axon guidance;biological adhesion;biological regulation;cell adhesion;cell junction assembly;cell junction organization;cell surface receptor linked signaling pathway;cell-cell adhesion;cell-cell junction organization;cellular component ass…	adenyl nucleotide binding;adenyl ribonucleotide binding;ATP binding;binding;enzyme binding;identical protein binding;nucleotide binding;protein binding;purine nucleotide binding;purine ribonucleoside triphosphate binding;purine ribonucleotide binding;ribonucleotide binding;structural constituent of cytoskeleton;structural molecule activity;ubiquitin protein ligase binding	blood microparticle;cell part;contractile fiber;cytoplasmic part;cytoskeletal part;cytoskeleton;cytosol;extracellular membrane-bounded organelle;extracellular organelle;extracellular region part;extracellular space;extracellular vesicular exosome;filamentous actin;intracellular membrane-bounded organelle;intracellular non-membrane-bounded organelle;intracellular organelle;intracellular organelle …	Adherens junction;Arrhythmogenic right ventricular cardiomyopathy (ARVC);Bacterial invasion of epithelial cells;Dilated cardiomyopathy;Focal adhesion;Hypertrophic cardiomyopathy (HCM);Leukocyte transendothelial migration;Pathogenic Escherichia coli infection;Phagosome;Phototransduction - fly;Regulation of actin cytoskeleton;Shigellosis;Tight junction;Vibrio cholerae infection;Viral myocarditis	Acetylation;ATP-binding;Completeproteome;Cytoplasm;Cytoskeleton;Deafness;Directproteinsequencing;Diseasemutation;Mentalretardation;Methylation;Non-syndromicdeafness;Nucleotide-binding;Oxidation;Polymorphism;Proteomicsidentification;Referenceproteome	GO:0001894;GO:0001895;GO:0002376;GO:0006928;GO:0006935;GO:0006950;GO:0006952;GO:0006955;GO:0006996;GO:0007010;GO:0007155;GO:0007165;GO:0007166;GO:0007167;GO:0007169;GO:0007264;GO:0007411;GO:0009605;GO:0009987;GO:0010033;GO:0016043;GO:0016337;GO:0022607;GO:0022610;GO:0030029;GO:0030036;GO:0031032;GO:0034109;GO:0034329;GO:0034330;GO:0034332;GO:0035556;GO:0035924;GO:0040011;GO:0042221;GO:0042330;GO:…	GO:0000166;GO:0005198;GO:0005200;GO:0005488;GO:0005515;GO:0005524;GO:0017076;GO:0019899;GO:0030554;GO:0031625;GO:0032553;GO:0032555;GO:0032559;GO:0035639;GO:0042802	GO:0005615;GO:0005634;GO:0005829;GO:0005856;GO:0005886;GO:0016020;GO:0030016;GO:0031941;GO:0031982;GO:0031988;GO:0032991;GO:0043226;GO:0043227;GO:0043228;GO:0043229;GO:0043230;GO:0043231;GO:0043232;GO:0043234;GO:0043292;GO:0044421;GO:0044422;GO:0044424;GO:0044430;GO:0044444;GO:0044446;GO:0044464;GO:0065010;GO:0070062;GO:0072562	14	14	1	595	595	48	38975	0	1301	4737100000	20	178	2.25702e+06	2.9254e+06
6404800	358680	5067400	9981500	9601900	9705700	179710	38399000	55320000	60679000	26556000	23477000	73530000	52072000	95561000	91689000	68254000	81903000	66568000	65154000	58141000	50412000	60561000	70965000	70964000				antibacterial humoral response;antimicrobial humoral response;biological regulation;cell killing;cellular component organization;cellular component organization at cellular level;cellular component organization or biogenesis;cellular component organization or biogenesis at cellular level;cellular process;cellular response to biotic stimulus;cellular response to chemical stimulus;cellular response…		cell part;cell projection;cell wall;cytoplasmic membrane-bounded vesicle;cytoplasmic part;cytoplasmic vesicle;cytosol;external encapsulating structure;extracellular membrane-bounded organelle;extracellular organelle;extracellular region part;extracellular space;extracellular vesicular exosome;intracellular membrane-bounded organelle;intracellular organelle;intracellular part;membrane-bounded orga…	ko05152;Salivary secretion	3D-structure;Antibiotic;Antimicrobial;Cleavageonpairofbasicresidues;Completeproteome;Directproteinsequencing;Disulfidebond;Proteomicsidentification;Referenceproteome;Secreted;Signal	GO:0001906;GO:0001932;GO:0001934;GO:0002227;GO:0002237;GO:0002251;GO:0002376;GO:0002385;GO:0006950;GO:0006952;GO:0006955;GO:0006959;GO:0006996;GO:0008284;GO:0009607;GO:0009617;GO:0009893;GO:0009987;GO:0010033;GO:0010562;GO:0010604;GO:0016043;GO:0019220;GO:0019222;GO:0019730;GO:0019731;GO:0022603;GO:0031323;GO:0031325;GO:0031399;GO:0031401;GO:0031640;GO:0032268;GO:0032270;GO:0032494;GO:0032496;GO:…		GO:0005615;GO:0005618;GO:0005829;GO:0016023;GO:0030141;GO:0030312;GO:0031410;GO:0031982;GO:0031988;GO:0042581;GO:0042995;GO:0043226;GO:0043227;GO:0043229;GO:0043230;GO:0043231;GO:0044421;GO:0044424;GO:0044444;GO:0044464;GO:0065010;GO:0070062	7	7	7	358	358	358	19591	0	19076	14968000000	9	173	4.26658e+06	3.26006e+06
758950	1029200	712080	198820	206470	224260	220290	186860	223490	177610	261420	0	177640	605150	595080	246390	362100	248450	147660	646230	548220	172290	620310	245530	179700				actin cytoskeleton organization;actin filament organization;actin filament-based process;alcohol biosynthetic process;alcohol catabolic process;alcohol metabolic process;anatomical structure homeostasis;ATP biosynthetic process;ATP metabolic process;biological regulation;biosynthetic process;blood coagulation;carbohydrate biosynthetic process;carbohydrate catabolic process;carbohydrate metabolic …	actin binding;aldehyde-lyase activity;binding;carbohydrate binding;carbon-carbon lyase activity;catalytic activity;cytoskeletal protein binding;fructose binding;fructose-bisphosphate aldolase activity;identical protein binding;lyase activity;monosaccharide binding;protein binding;sugar binding;tubulin binding	actin cytoskeleton;cell part;contractile fiber part;cytoplasmic membrane-bounded vesicle lumen;cytoplasmic part;cytoplasmic vesicle part;cytoskeleton;cytosol;extracellular membrane-bounded organelle;extracellular organelle;extracellular region;extracellular region part;extracellular space;extracellular vesicular exosome;I band;intracellular membrane-bounded organelle;intracellular non-membrane-bo…	Carbon fixation in photosynthetic organisms;Fructose and mannose metabolism;Glycolysis / Gluconeogenesis;Pentose phosphate pathway	3D-structure;Acetylation;Alternativesplicing;Completeproteome;Cytoplasm;Directproteinsequencing;Diseasemutation;Glycogenstoragedisease;Glycolysis;Hereditaryhemolyticanemia;Lyase;Phosphoprotein;Polymorphism;Proteomicsidentification;Referenceproteome;Schiffbase	GO:0001775;GO:0002576;GO:0003008;GO:0003012;GO:0005975;GO:0005996;GO:0006000;GO:0006006;GO:0006007;GO:0006066;GO:0006091;GO:0006094;GO:0006096;GO:0006139;GO:0006163;GO:0006164;GO:0006461;GO:0006753;GO:0006754;GO:0006807;GO:0006810;GO:0006887;GO:0006936;GO:0006941;GO:0006996;GO:0007010;GO:0007015;GO:0007596;GO:0007599;GO:0008152;GO:0008360;GO:0009056;GO:0009058;GO:0009117;GO:0009141;GO:0009142;GO:…	GO:0003779;GO:0003824;GO:0004332;GO:0005488;GO:0005515;GO:0005529;GO:0008092;GO:0015631;GO:0016829;GO:0016830;GO:0016832;GO:0030246;GO:0042802;GO:0048029;GO:0070061	GO:0005576;GO:0005615;GO:0005634;GO:0005829;GO:0005856;GO:0015629;GO:0016020;GO:0031093;GO:0031430;GO:0031674;GO:0031974;GO:0031982;GO:0031983;GO:0031988;GO:0034774;GO:0043226;GO:0043227;GO:0043228;GO:0043229;GO:0043230;GO:0043231;GO:0043232;GO:0043233;GO:0044421;GO:0044422;GO:0044424;GO:0044433;GO:0044444;GO:0044446;GO:0044449;GO:0044464;GO:0060205;GO:0065010;GO:0070062	4	4	4	16	16	16	39817	0	50895	543710000	21	28	346413	359879
1473699968	1740000000	1596300032	2017400064	1491800064	1879399936	1052700032	1996499968	1794599936	1482499968	679569984	614680000	821720000	1564300032	1910400000	2105500032	1641699968	2119800064	1880300032	2058700032	1843600000	2107200000	2267500032	1981400064	2070700032				biological regulation;catabolic process;cellular component organization;cellular component organization or biogenesis;cellular lipid metabolic process;cellular macromolecule metabolic process;cellular metabolic process;cellular process;cellular response to stimulus;chemical homeostasis;cholesterol efflux;cholesterol homeostasis;cholesterol transport;chylomicron remnant clearance;chylomicron remod…	binding;enzyme activator activity;enzyme binding;enzyme inhibitor activity;enzyme regulator activity;identical protein binding;lipase activator activity;lipase inhibitor activity;lipid binding;lipoprotein lipase activator activity;phospholipase activator activity;phospholipase binding;protein binding;protein dimerization activity;protein homodimerization activity	cell part;chylomicron;cytoplasmic part;early endosome;endosome;extracellular membrane-bounded organelle;extracellular organelle;extracellular region;extracellular region part;extracellular space;extracellular vesicular exosome;high-density lipoprotein particle;intermediate-density lipoprotein particle;intracellular membrane-bounded organelle;intracellular organelle;intracellular part;low-density …		3D-structure;Chylomicron;Completeproteome;Directproteinsequencing;Diseasemutation;Glycoprotein;HDL;Hyperlipidemia;LDL;Lipiddegradation;Lipidmetabolism;Lipidtransport;Polymorphism;Referenceproteome;Secreted;Sialicacid;Signal;Transport;VLDL	GO:0001523;GO:0006629;GO:0006720;GO:0006721;GO:0006810;GO:0006869;GO:0007165;GO:0007602;GO:0007603;GO:0008152;GO:0009056;GO:0009314;GO:0009416;GO:0009581;GO:0009582;GO:0009583;GO:0009584;GO:0009605;GO:0009628;GO:0009889;GO:0009891;GO:0009892;GO:0009893;GO:0009894;GO:0009896;GO:0009987;GO:0010517;GO:0010518;GO:0010565;GO:0010896;GO:0010898;GO:0010901;GO:0010902;GO:0010915;GO:0010916;GO:0010984;GO:…	GO:0004857;GO:0005488;GO:0005515;GO:0008047;GO:0008289;GO:0016004;GO:0019899;GO:0030234;GO:0042802;GO:0042803;GO:0043274;GO:0046983;GO:0055102;GO:0060229;GO:0060230	GO:0005576;GO:0005615;GO:0005768;GO:0005769;GO:0031982;GO:0031988;GO:0032991;GO:0032994;GO:0034358;GO:0034361;GO:0034362;GO:0034363;GO:0034364;GO:0034366;GO:0034385;GO:0042627;GO:0043226;GO:0043227;GO:0043229;GO:0043230;GO:0043231;GO:0044421;GO:0044424;GO:0044444;GO:0044464;GO:0065010;GO:0070062	9	9	7	399	399	337	20049	0	32331	4092500000000000	6	584	3.15891e+08	3.19442e+08
9073100	2763700	4231200	12087000	3801100	11692000	12888000	5294100	3967400	4943100	7655000	8910800	3462900	7282500	7648900	2849500	10322000	1914900	7068100	2190400	914800	1011200	3724000	3967000	1926400				alcohol metabolic process;anion transport;cell death;cell killing;cellular component organization;cellular component organization or biogenesis;cellular macromolecule metabolic process;cellular membrane organization;cellular metabolic process;cellular process;chloride transport;cholesterol metabolic process;cytolysis;death;defense response;endocytosis;establishment of localization;immune response…	anion channel activity;anion transmembrane transporter activity;binding;channel activity;chloride channel activity;ion channel activity;ion transmembrane transporter activity;lipid binding;passive transmembrane transporter activity;substrate-specific channel activity;substrate-specific transmembrane transporter activity;substrate-specific transporter activity;transmembrane transporter activity;tr…	blood microparticle;cell part;extracellular region;extracellular region part;extracellular space;high-density lipoprotein particle;intrinsic to membrane;macromolecular complex;membrane part;plasma lipoprotein particle;protein-lipid complex;triglyceride-rich lipoprotein particle;very-low-density lipoprotein particle		Alternativesplicing;Cholesterolmetabolism;Completeproteome;Directproteinsequencing;Diseasemutation;Glycoprotein;HDL;Lipidmetabolism;Lipidtransport;Phosphoprotein;Polymorphism;Referenceproteome;Secreted;Signal;Steroidmetabolism;Sterolmetabolism;Transport	GO:0001906;GO:0002376;GO:0006066;GO:0006629;GO:0006810;GO:0006811;GO:0006820;GO:0006821;GO:0006869;GO:0006897;GO:0006898;GO:0006950;GO:0006952;GO:0006955;GO:0008152;GO:0008202;GO:0008203;GO:0008219;GO:0009987;GO:0010324;GO:0015698;GO:0016043;GO:0016044;GO:0016125;GO:0016192;GO:0016265;GO:0019835;GO:0031640;GO:0042157;GO:0043170;GO:0044237;GO:0044238;GO:0044260;GO:0044281;GO:0045087;GO:0050896;GO:…	GO:0005215;GO:0005216;GO:0005253;GO:0005254;GO:0005488;GO:0008289;GO:0008509;GO:0015075;GO:0015267;GO:0022803;GO:0022838;GO:0022857;GO:0022891;GO:0022892	GO:0005576;GO:0005615;GO:0031224;GO:0032991;GO:0032994;GO:0034358;GO:0034361;GO:0034364;GO:0034385;GO:0044421;GO:0044425;GO:0044464;GO:0072562	10	10	10	241	241	241	43974	0	11428	10381000000	19	217	4.37018e+06	3.67211e+06
77479000	68837000	67359000	91238000	143940000	111880000	111580000	67755000	65048000	64560000	91622000	94532000	44193000	37853000	31893000	27352000	40571000	57903000	42082000	37577000	43360000	46780000	63171000	53698000	55138000				apoptosis;cell death;cellular defense response;cellular process;death;defense response;programmed cell death;response to stimulus;response to stress	cargo receptor activity;receptor activity;scavenger receptor activity	blood microparticle;cell part;extracellular membrane-bounded organelle;extracellular organelle;extracellular region;extracellular region part;extracellular space;extracellular vesicular exosome;membrane;membrane-bounded organelle;membrane-bounded vesicle;organelle;vesicle		Apoptosis;Completeproteome;Directproteinsequencing;Disulfidebond;Polymorphism;Referenceproteome;Repeat;Secreted;Signal	GO:0006915;GO:0006950;GO:0006952;GO:0006968;GO:0008219;GO:0009987;GO:0012501;GO:0016265;GO:0050896	GO:0004872;GO:0005044;GO:0038024	GO:0005576;GO:0005615;GO:0016020;GO:0031982;GO:0031988;GO:0043226;GO:0043227;GO:0043230;GO:0044421;GO:0044464;GO:0065010;GO:0070062;GO:0072562	18	18	18	588	588	588	38087	0	27456	48632000000	18	349	2.80386e+07	1.82766e+07
1502300	1997700	14426000	0	717800	1762700	0	0	0	0	0	0	0	0	0	0	0	0	0	0	0	0	0	0	0				anatomical structure development;antibacterial humoral response;antimicrobial humoral response;ATP-dependent chromatin remodeling;biological regulation;cell migration;cell motility;cellular component assembly;cellular component assembly at cellular level;cellular component disassembly;cellular component disassembly at cellular level;cellular component movement;cellular component organization;cell…	binding;DNA binding;nucleic acid binding	cell part;chromosomal part;extracellular membrane-bounded organelle;extracellular organelle;extracellular region part;extracellular space;extracellular vesicular exosome;extrinsic to membrane;extrinsic to plasma membrane;intracellular membrane-bounded organelle;intracellular organelle;intracellular organelle part;intracellular part;macromolecular complex;membrane part;membrane-bounded organelle;m…	Systemic lupus erythematosus	3D-structure;Acetylation;Alternativesplicing;Antibiotic;Antimicrobial;Chromosome;Completeproteome;Directproteinsequencing;DNA-binding;Glycoprotein;Isopeptidebond;Methylation;Nucleosomecore;Nucleus;Phosphoprotein;Polymorphism;Proteomicsidentification;Referenceproteome;Ublconjugation	GO:0002227;GO:0002251;GO:0002376;GO:0002385;GO:0006325;GO:0006334;GO:0006337;GO:0006338;GO:0006928;GO:0006950;GO:0006952;GO:0006954;GO:0006955;GO:0006959;GO:0006996;GO:0008152;GO:0009607;GO:0009611;GO:0009617;GO:0009987;GO:0016043;GO:0016477;GO:0016485;GO:0016568;GO:0019538;GO:0019730;GO:0019731;GO:0021762;GO:0022411;GO:0022414;GO:0022607;GO:0031638;GO:0031639;GO:0032502;GO:0032984;GO:0032986;GO:…	GO:0003676;GO:0003677;GO:0005488	GO:0000786;GO:0000788;GO:0005615;GO:0005634;GO:0005654;GO:0019897;GO:0019898;GO:0031982;GO:0031988;GO:0032991;GO:0032993;GO:0043226;GO:0043227;GO:0043229;GO:0043230;GO:0043231;GO:0044421;GO:0044422;GO:0044424;GO:0044425;GO:0044427;GO:0044428;GO:0044446;GO:0044454;GO:0044459;GO:0044464;GO:0065010;GO:0070062	2	2	2	19	19	19	13906	0	416	537280000	7	9	5.13956e+06	4.26743e+06
4551200	2623900	3738300	1739800	412350	535760	2497300	5737100	7036300	6275700	2026700	177470	5229800	3707800	4619400	4340400	6442300	5551700	7377100	5278300	5560300	3985000	10385000	7152100	7878700				activation of immune response;biological regulation;cell recognition;cellular process;complement activation;complement activation, lectin pathway;defense response;defense response to virus;humoral immune response;immune effector process;immune response;immune system process;innate immune response;macromolecule metabolic process;metabolic process;multi-organism process;negative regulation of biolo…	antigen binding;binding;carbohydrate binding	blood microparticle;collagen;extracellular matrix part;extracellular region;extracellular region part		3D-structure;Alternativesplicing;Collagen;Complementactivationlectinpathway;Completeproteome;Directproteinsequencing;Disulfidebond;Glycoprotein;Hydroxylation;Immunity;Innateimmunity;Lectin;Referenceproteome;Repeat;Secreted;Signal	GO:0001867;GO:0002252;GO:0002253;GO:0002376;GO:0002682;GO:0002684;GO:0006910;GO:0006950;GO:0006952;GO:0006955;GO:0006956;GO:0006959;GO:0008037;GO:0008152;GO:0009607;GO:0009615;GO:0009987;GO:0019538;GO:0040012;GO:0043170;GO:0043654;GO:0043900;GO:0043903;GO:0044238;GO:0045087;GO:0046596;GO:0046597;GO:0048518;GO:0048519;GO:0048525;GO:0048583;GO:0048584;GO:0050776;GO:0050778;GO:0050789;GO:0050792;GO:…	GO:0003823;GO:0005488;GO:0030246	GO:0005576;GO:0005581;GO:0044420;GO:0044421;GO:0072562	9	9	9	405	405	405	32903	0	11629	3262300000	15	98	1.54219e+06	1.55435e+06
11729000	6041900	10479000	16713000	18333000	17867000	25967000	104110000	114310000	101970000	132850000	221440000	119510000	137420000	121210000	108370000	108850000	77047000	79927000	43400000	46605000	47387000	50290000	29462000	40914000				biological regulation;cellular component assembly;cellular component organization;cellular component organization or biogenesis;cellular lipid metabolic process;cellular macromolecule metabolic process;cellular metabolic process;cellular process;cellular response to stimulus;chemical homeostasis;cholesterol efflux;cholesterol homeostasis;cholesterol transport;detection of abiotic stimulus;detecti…	antioxidant activity;binding;lipid binding;lipid transporter activity;phospholipid binding;substrate-specific transporter activity;transporter activity	cell part;discoidal high-density lipoprotein particle;extracellular membrane-bounded organelle;extracellular organelle;extracellular region;extracellular region part;extracellular vesicular exosome;high-density lipoprotein particle;integral to membrane;integral to plasma membrane;intrinsic to membrane;intrinsic to plasma membrane;low-density lipoprotein particle;macromolecular complex;membrane pa…		3D-structure;Alternativesplicing;Completeproteome;Directproteinsequencing;Disulfidebond;Glycoprotein;HDL;Lipidtransport;Referenceproteome;Secreted;Signal;Transport	GO:0001523;GO:0006629;GO:0006720;GO:0006721;GO:0006810;GO:0006869;GO:0007165;GO:0007602;GO:0007603;GO:0008152;GO:0009314;GO:0009416;GO:0009581;GO:0009582;GO:0009583;GO:0009584;GO:0009605;GO:0009628;GO:0009743;GO:0009746;GO:0009749;GO:0009892;GO:0009987;GO:0010033;GO:0010605;GO:0015918;GO:0016043;GO:0016101;GO:0019222;GO:0022607;GO:0030301;GO:0031323;GO:0031324;GO:0032268;GO:0032269;GO:0032501;GO:…	GO:0005215;GO:0005319;GO:0005488;GO:0005543;GO:0008289;GO:0016209;GO:0022892	GO:0005576;GO:0005887;GO:0016021;GO:0031224;GO:0031226;GO:0031982;GO:0031988;GO:0032991;GO:0032994;GO:0034358;GO:0034361;GO:0034362;GO:0034364;GO:0034365;GO:0034366;GO:0034385;GO:0043226;GO:0043227;GO:0043230;GO:0044421;GO:0044425;GO:0044459;GO:0044464;GO:0065010;GO:0070062	8	8	1	383	383	53	21253	0	68406	41672000000	10	274	6.49713e+06	6.5749e+07
52902000	65363000	61880000	90271000	74255000	69661000	78479000	48602000	39500000	40555000	53714000	51890000	35112000	22031000	20964000	24458000	29757000	23129000	28410000	29670000	30320000	25126000	39925000	35947000	34801000				acute inflammatory response;acute-phase response;biological regulation;cellular component organization;cellular component organization or biogenesis;cellular membrane organization;cellular process;defense response;defense response to bacterium;endocytosis;establishment of localization;immune system process;inflammatory response;membrane invagination;membrane organization;multi-organism process;ne…	antioxidant activity;binding;catalytic activity;endopeptidase activity;hemoglobin binding;hydrolase activity;peptidase activity;peptidase activity, acting on L-amino acid peptides;protein binding;serine hydrolase activity;serine-type endopeptidase activity;serine-type peptidase activity	blood microparticle;cell part;cytoplasmic membrane-bounded vesicle lumen;cytoplasmic part;cytoplasmic vesicle part;endocytic vesicle lumen;extracellular membrane-bounded organelle;extracellular organelle;extracellular region;extracellular region part;extracellular space;extracellular vesicular exosome;haptoglobin-hemoglobin complex;intracellular organelle part;intracellular part;macromolecular co…		3D-structure;Acutephase;Alternativesplicing;Antibiotic;Antimicrobial;Antioxidant;Completeproteome;Directproteinsequencing;Diseasemutation;Disulfidebond;Glycoprotein;Hemoglobin-binding;Immunity;Polymorphism;Proteomicsidentification;Referenceproteome;Repeat;Secreted;Serineproteasehomolog;Signal;Sushi	GO:0000302;GO:0002376;GO:0002526;GO:0006810;GO:0006897;GO:0006898;GO:0006950;GO:0006952;GO:0006953;GO:0006954;GO:0006979;GO:0009607;GO:0009611;GO:0009617;GO:0009892;GO:0009894;GO:0009895;GO:0009987;GO:0010035;GO:0010310;GO:0010324;GO:0010727;GO:0010941;GO:0010942;GO:0016043;GO:0016044;GO:0016192;GO:0019222;GO:0031323;GO:0031324;GO:0031329;GO:0031330;GO:0042221;GO:0042542;GO:0042742;GO:0043086;GO:…	GO:0003824;GO:0004175;GO:0004252;GO:0005488;GO:0005515;GO:0008233;GO:0008236;GO:0016209;GO:0016787;GO:0017171;GO:0030492;GO:0070011	GO:0005576;GO:0005615;GO:0031838;GO:0031974;GO:0031982;GO:0031983;GO:0031988;GO:0032991;GO:0043226;GO:0043227;GO:0043230;GO:0043233;GO:0043234;GO:0044421;GO:0044422;GO:0044424;GO:0044433;GO:0044444;GO:0044446;GO:0044464;GO:0060205;GO:0065010;GO:0070062;GO:0071682;GO:0072562	23	23	11	51	51	31	45205	0	30994	62753000000	20	552	1.21084e+07	1.31359e+07
8948300	14021000	13777000	0	13345000	10176000	13414000	7446600	380890	3304800	123070	2263900	4029700	3591700	2498400	146910	3923400	212560	4206800	4746300	3576000	3433700	276980	589970	3458300				biological regulation;cellular component organization;cellular component organization or biogenesis;cellular membrane organization;cellular process;endocytosis;establishment of localization;membrane invagination;membrane organization;positive regulation of defense response to virus by host;receptor-mediated endocytosis;regulation of biological process;regulation of defense response;regulation of …	binding;catalytic activity;endopeptidase activity;hemoglobin binding;hydrolase activity;peptidase activity;peptidase activity, acting on L-amino acid peptides;protein binding;serine hydrolase activity;serine-type endopeptidase activity;serine-type peptidase activity	blood microparticle;extracellular membrane-bounded organelle;extracellular organelle;extracellular region;extracellular region part;extracellular vesicular exosome;high-density lipoprotein particle;macromolecular complex;membrane-bounded organelle;membrane-bounded vesicle;organelle;plasma lipoprotein particle;protein-lipid complex;spherical high-density lipoprotein particle;vesicle	African trypanosomiasis	Alternativesplicing;Completeproteome;Disulfidebond;Hemoglobin-binding;Polymorphism;Proteomicsidentification;Referenceproteome;Secreted;Serineproteasehomolog;Signal;Sushi	GO:0002230;GO:0002682;GO:0002697;GO:0002831;GO:0006810;GO:0006897;GO:0006898;GO:0009987;GO:0010324;GO:0016043;GO:0016044;GO:0016192;GO:0031347;GO:0043900;GO:0048583;GO:0050688;GO:0050691;GO:0050789;GO:0051234;GO:0061024;GO:0065007;GO:0071840;GO:0080134	GO:0003824;GO:0004175;GO:0004252;GO:0005488;GO:0005515;GO:0008233;GO:0008236;GO:0016787;GO:0017171;GO:0030492;GO:0070011	GO:0005576;GO:0031982;GO:0031988;GO:0032991;GO:0032994;GO:0034358;GO:0034364;GO:0034366;GO:0043226;GO:0043227;GO:0043230;GO:0044421;GO:0065010;GO:0070062;GO:0072562	17	5	5	445	213	213	39029	0	35814	4911300000	20	37	5.04116e+06	3.41593e+06
0	0	0	0	76331	42430	79391	206920	363540	302140	0	88891	131260	76243	80952	272230	418490	97841	471870	38472	83734	149220	42934	0	0				biological regulation;blood coagulation;cell activation;cellular component disassembly;cellular component disassembly at cellular level;cellular component organization;cellular component organization at cellular level;cellular component organization or biogenesis;cellular component organization or biogenesis at cellular level;cellular macromolecule metabolic process;cellular metabolic process;cel…	apolipoprotein binding;binding;catalytic activity;endopeptidase activity;hydrolase activity;peptidase activity;peptidase activity, acting on L-amino acid peptides;protein binding;protein domain specific binding;receptor binding;serine hydrolase activity;serine-type endopeptidase activity;serine-type peptidase activity	blood microparticle;cell part;cell surface;cytoplasmic membrane-bounded vesicle lumen;cytoplasmic part;cytoplasmic vesicle part;extracellular membrane-bounded organelle;extracellular organelle;extracellular region;extracellular region part;extracellular space;extracellular vesicular exosome;extrinsic to external side of plasma membrane;extrinsic to membrane;extrinsic to plasma membrane;intracellu…	Complement and coagulation cascades;Neuroactive ligand-receptor interaction;Staphylococcus aureus infection	3D-structure;Bloodcoagulation;Cleavageonpairofbasicresidues;Completeproteome;Directproteinsequencing;Diseasemutation;Disulfidebond;Fibrinolysis;Glycoprotein;Hemostasis;Hydrolase;Kringle;Phosphoprotein;Polymorphism;Protease;Referenceproteome;Repeat;Secreted;Serineprotease;Signal;Thrombophilia;Tissueremodeling;Zymogen	GO:0001775;GO:0002576;GO:0006810;GO:0006887;GO:0007162;GO:0007596;GO:0007599;GO:0008152;GO:0008285;GO:0009987;GO:0010810;GO:0010812;GO:0016043;GO:0016192;GO:0019538;GO:0022407;GO:0022408;GO:0022411;GO:0022617;GO:0030155;GO:0030168;GO:0030193;GO:0030194;GO:0030195;GO:0030198;GO:0032101;GO:0032501;GO:0032940;GO:0033628;GO:0033629;GO:0042127;GO:0042730;GO:0043062;GO:0043170;GO:0044237;GO:0044238;GO:…	GO:0003824;GO:0004175;GO:0004252;GO:0005102;GO:0005488;GO:0005515;GO:0008233;GO:0008236;GO:0016787;GO:0017171;GO:0019904;GO:0034185;GO:0070011	GO:0005576;GO:0005615;GO:0005886;GO:0009986;GO:0016020;GO:0019897;GO:0019898;GO:0031093;GO:0031232;GO:0031974;GO:0031982;GO:0031983;GO:0031988;GO:0034774;GO:0043226;GO:0043227;GO:0043230;GO:0043233;GO:0044421;GO:0044422;GO:0044424;GO:0044425;GO:0044433;GO:0044444;GO:0044446;GO:0044459;GO:0044464;GO:0060205;GO:0065010;GO:0070062;GO:0072562	4	4	4	7	7	7	90568	0	25214	383750000	43	13	37239.1	33587.1
0	0	0	0	0	0	0	0	0	0	0	0	0	66526	440530	0	502240	0	0	0	542340	40725	0	0	650900				acute inflammatory response;biological regulation;blood coagulation;blood coagulation, intrinsic pathway;coagulation;defense response;Factor XII activation;fibrinolysis;hemostasis;immune response;immune system process;inflammatory response;innate immune response;kinin cascade;macromolecule metabolic process;metabolic process;multicellular organismal process;negative regulation of biological proce…	aminopeptidase activity;binding;catalytic activity;endopeptidase activity;exopeptidase activity;hydrolase activity;misfolded protein binding;peptidase activity;peptidase activity, acting on L-amino acid peptides;protein binding;serine hydrolase activity;serine-type aminopeptidase activity;serine-type endopeptidase activity;serine-type exopeptidase activity;serine-type peptidase activity	cell part;extracellular membrane-bounded organelle;extracellular organelle;extracellular region;extracellular region part;extracellular space;extracellular vesicular exosome;membrane;membrane-bounded organelle;membrane-bounded vesicle;organelle;plasma membrane;vesicle	Complement and coagulation cascades	3D-structure;Bloodcoagulation;Completeproteome;Directproteinsequencing;Diseasemutation;Disulfidebond;EGF-likedomain;Fibrinolysis;Glycoprotein;Hemostasis;Hydrolase;Kringle;Polymorphism;Protease;Referenceproteome;Repeat;Secreted;Serineprotease;Signal;Zymogen	GO:0002254;GO:0002353;GO:0002376;GO:0002526;GO:0002542;GO:0002673;GO:0006950;GO:0006952;GO:0006954;GO:0006955;GO:0007596;GO:0007597;GO:0007599;GO:0008152;GO:0009611;GO:0010033;GO:0010468;GO:0010755;GO:0010756;GO:0010954;GO:0016485;GO:0016540;GO:0019222;GO:0019538;GO:0030193;GO:0030194;GO:0030195;GO:0031347;GO:0031638;GO:0032101;GO:0032501;GO:0035966;GO:0042221;GO:0042730;GO:0043170;GO:0044238;GO:…	GO:0003824;GO:0004175;GO:0004177;GO:0004252;GO:0005488;GO:0005515;GO:0008233;GO:0008236;GO:0008238;GO:0016787;GO:0017171;GO:0051787;GO:0070008;GO:0070009;GO:0070011	GO:0005576;GO:0005615;GO:0005886;GO:0016020;GO:0031982;GO:0031988;GO:0043226;GO:0043227;GO:0043230;GO:0044421;GO:0044464;GO:0065010;GO:0070062	2	2	2	44	44	44	67791	0	11421	90554000	28	2	0	67967.8
27023	42977	27001	42111	18115	11653	26581	358690	108670	151100	603300	528610	323430	508650	450730	557100	546770	549000	568760	215360	202720	233450	257790	235570	330410				biological regulation;blood coagulation;coagulation;hemostasis;multicellular organismal process;negative regulation of biological process;negative regulation of catalytic activity;negative regulation of defense response;negative regulation of endopeptidase activity;negative regulation of hydrolase activity;negative regulation of inflammatory response;negative regulation of molecular function;nega…	binding;carbohydrate binding;endopeptidase inhibitor activity;endopeptidase regulator activity;enzyme binding;enzyme inhibitor activity;enzyme regulator activity;glycosaminoglycan binding;heparin binding;pattern binding;peptidase inhibitor activity;peptidase regulator activity;polysaccharide binding;protease binding;protein binding;serine-type endopeptidase inhibitor activity	blood microparticle;cell part;extracellular membrane-bounded organelle;extracellular organelle;extracellular region;extracellular region part;extracellular space;extracellular vesicular exosome;membrane;membrane-bounded organelle;membrane-bounded vesicle;organelle;plasma membrane;vesicle	Complement and coagulation cascades	3D-structure;Bloodcoagulation;Completeproteome;Directproteinsequencing;Diseasemutation;Disulfidebond;Glycoprotein;Hemostasis;Heparin-binding;Phosphoprotein;Polymorphism;Proteaseinhibitor;Referenceproteome;Secreted;Serineproteaseinhibitor;Signal;Thrombophilia	GO:0007584;GO:0007596;GO:0007599;GO:0009605;GO:0009991;GO:0010466;GO:0010951;GO:0019222;GO:0030193;GO:0031347;GO:0031348;GO:0031667;GO:0032101;GO:0032102;GO:0032501;GO:0042221;GO:0043086;GO:0044092;GO:0048519;GO:0048583;GO:0048585;GO:0050727;GO:0050728;GO:0050789;GO:0050790;GO:0050817;GO:0050818;GO:0050878;GO:0050896;GO:0051239;GO:0051246;GO:0051336;GO:0051346;GO:0052547;GO:0052548;GO:0060255;GO:…	GO:0001871;GO:0002020;GO:0004857;GO:0004866;GO:0004867;GO:0005488;GO:0005515;GO:0005539;GO:0008201;GO:0019899;GO:0030234;GO:0030246;GO:0030247;GO:0030414;GO:0061134;GO:0061135	GO:0005576;GO:0005615;GO:0005886;GO:0016020;GO:0031982;GO:0031988;GO:0043226;GO:0043227;GO:0043230;GO:0044421;GO:0044464;GO:0065010;GO:0070062;GO:0072562	4	4	4	116	116	116	52602	0	2749	524780000	27	24	11491.3	82722.1
258320	0	0	644070	657400	603790	983600	1329800	1043700	535860	1289700	63992	1729500	2840000	3043400	2209800	2336300	1251000	0	883380	1171200	1196000	1403200	1461900	1267200				acute inflammatory response;acute-phase response;anatomical structure homeostasis;biological regulation;defense response;digestive system process;epithelial structure maintenance;homeostatic process;inflammatory response;maintenance of gastrointestinal epithelium;multicellular organismal process;negative regulation of catalytic activity;negative regulation of endopeptidase activity;negative regul…	binding;DNA binding;endopeptidase inhibitor activity;endopeptidase regulator activity;enzyme inhibitor activity;enzyme regulator activity;nucleic acid binding;peptidase inhibitor activity;peptidase regulator activity;serine-type endopeptidase inhibitor activity	blood microparticle;cell part;extracellular membrane-bounded organelle;extracellular organelle;extracellular region;extracellular region part;extracellular space;extracellular vesicular exosome;intracellular;intracellular membrane-bounded organelle;intracellular organelle;intracellular part;membrane-bounded organelle;membrane-bounded vesicle;nucleus;organelle;vesicle		3D-structure;Acutephase;Alternativesplicing;Completeproteome;Directproteinsequencing;Diseasemutation;Glycoprotein;Polymorphism;Proteaseinhibitor;Proteomicsidentification;Referenceproteome;Secreted;Serineproteaseinhibitor;Signal	GO:0001894;GO:0002526;GO:0003008;GO:0006950;GO:0006952;GO:0006953;GO:0006954;GO:0009611;GO:0010466;GO:0010669;GO:0010951;GO:0019216;GO:0019222;GO:0022600;GO:0030277;GO:0032501;GO:0042592;GO:0043086;GO:0044092;GO:0050789;GO:0050790;GO:0050896;GO:0051336;GO:0051346;GO:0052547;GO:0052548;GO:0060249;GO:0065007;GO:0065008;GO:0065009;GO:0080090	GO:0003676;GO:0003677;GO:0004857;GO:0004866;GO:0004867;GO:0005488;GO:0030234;GO:0030414;GO:0061134;GO:0061135	GO:0005576;GO:0005615;GO:0005622;GO:0005634;GO:0031982;GO:0031988;GO:0043226;GO:0043227;GO:0043229;GO:0043230;GO:0043231;GO:0044421;GO:0044424;GO:0044464;GO:0065010;GO:0070062;GO:0072562	5	5	5	113	113	113	4765	0	35169	1093500000	20	57	372111	616662
2159800	1711800	2002100	3461200	5537500	4916200	4856100	5346300	3774800	4215900	9717100	8084700	8738600	7546700	9321300	8739800	6278700	7052900	7926200	1703200	1539100	1558300	3753800	4044800	3499700				biological regulation;blood coagulation;blood coagulation, intrinsic pathway;cell activation;cell differentiation;cellular component disassembly;cellular component disassembly at cellular level;cellular component organization;cellular component organization at cellular level;cellular component organization or biogenesis;cellular component organization or biogenesis at cellular level;cellular deve…	binding;calcium-dependent protein binding;chemokine binding;C-X-C chemokine binding;cytokine binding;endopeptidase inhibitor activity;endopeptidase regulator activity;enzyme binding;enzyme inhibitor activity;enzyme regulator activity;growth factor binding;interleukin-1 binding;interleukin-8 binding;peptidase inhibitor activity;peptidase regulator activity;protease binding;protein binding;receptor…	blood microparticle;cell part;cytoplasmic membrane-bounded vesicle lumen;cytoplasmic part;cytoplasmic vesicle part;cytosol;extracellular membrane-bounded organelle;extracellular organelle;extracellular region;extracellular region part;extracellular vesicular exosome;intracellular organelle part;intracellular part;membrane-bounded organelle;membrane-bounded vesicle;membrane-enclosed lumen;organell…	Complement and coagulation cascades	3D-structure;Baitregion;Completeproteome;Directproteinsequencing;Disulfidebond;Glycoprotein;Isopeptidebond;Polymorphism;Proteaseinhibitor;Referenceproteome;Secreted;Serineproteaseinhibitor;Signal;Thioesterbond	GO:0001775;GO:0001868;GO:0001869;GO:0002576;GO:0002673;GO:0002682;GO:0002683;GO:0002697;GO:0002698;GO:0002920;GO:0002921;GO:0006810;GO:0006887;GO:0007165;GO:0007264;GO:0007596;GO:0007597;GO:0007599;GO:0008152;GO:0009892;GO:0009966;GO:0009987;GO:0010466;GO:0010468;GO:0010605;GO:0010951;GO:0010955;GO:0016043;GO:0016192;GO:0019222;GO:0019538;GO:0022411;GO:0022617;GO:0023051;GO:0030154;GO:0030168;GO:…	GO:0002020;GO:0004857;GO:0004866;GO:0004867;GO:0005102;GO:0005488;GO:0005515;GO:0019838;GO:0019899;GO:0019955;GO:0019956;GO:0019958;GO:0019959;GO:0019966;GO:0030234;GO:0030414;GO:0043120;GO:0048306;GO:0061134;GO:0061135	GO:0005576;GO:0005829;GO:0031093;GO:0031974;GO:0031982;GO:0031983;GO:0031988;GO:0034774;GO:0043226;GO:0043227;GO:0043230;GO:0043233;GO:0044421;GO:0044422;GO:0044424;GO:0044433;GO:0044444;GO:0044446;GO:0044464;GO:0060205;GO:0065010;GO:0070062;GO:0072562	42	42	42	35	35	35	16329	0	32331	20075000000	69	385	1.59332e+06	1.49659e+06
1978900	1743200	2007900	3941000	4769500	5266300	2830600	3204400	3214800	3850500	4720500	2980200	11303000	12939000	15720000	12564000	9490800	16940000	10082000	1542400	1288700	1294700	3430800	3721000	3378000				activation of immune response;biological regulation;carboxylic acid metabolic process;cell surface receptor linked signaling pathway;cellular ketone metabolic process;cellular lipid metabolic process;cellular metabolic process;cellular process;cellular response to stimulus;complement activation;complement activation, alternative pathway;complement activation, classical pathway;defense response;fa…	binding;C5a anaphylatoxin chemotactic receptor binding;C5L2 anaphylatoxin chemotactic receptor binding;endopeptidase inhibitor activity;endopeptidase regulator activity;enzyme inhibitor activity;enzyme regulator activity;G-protein-coupled receptor binding;peptidase inhibitor activity;peptidase regulator activity;protein binding;receptor binding	blood microparticle;cell part;extracellular membrane-bounded organelle;extracellular organelle;extracellular region;extracellular region part;extracellular space;extracellular vesicular exosome;membrane;membrane-bounded organelle;membrane-bounded vesicle;organelle;plasma membrane;vesicle	Chagas disease (American trypanosomiasis);Complement and coagulation cascades;ko05152;Leishmaniasis;Phagosome;Staphylococcus aureus infection;Systemic lupus erythematosus	3D-structure;Age-relatedmaculardegeneration;Cleavageonpairofbasicresidues;Complementalternatepathway;Complementpathway;Completeproteome;Directproteinsequencing;Diseasemutation;Disulfidebond;Fattyacidmetabolism;Glycoprotein;Hemolyticuremicsyndrome;Immunity;Inflammatoryresponse;Innateimmunity;Lipidmetabolism;Phosphoprotein;Polymorphism;Referenceproteome;Secreted;Signal;Thioesterbond	GO:0001796;GO:0001798;GO:0001817;GO:0001819;GO:0001932;GO:0001934;GO:0001969;GO:0001970;GO:0002252;GO:0002253;GO:0002376;GO:0002673;GO:0002675;GO:0002682;GO:0002684;GO:0002697;GO:0002699;GO:0002703;GO:0002705;GO:0002706;GO:0002708;GO:0002712;GO:0002714;GO:0002819;GO:0002821;GO:0002822;GO:0002824;GO:0002861;GO:0002863;GO:0002864;GO:0002866;GO:0002883;GO:0002885;GO:0002886;GO:0002888;GO:0002889;GO:…	GO:0001664;GO:0004857;GO:0004866;GO:0005102;GO:0005488;GO:0005515;GO:0030234;GO:0030414;GO:0031714;GO:0031715;GO:0061134;GO:0061135	GO:0005576;GO:0005615;GO:0005886;GO:0016020;GO:0031982;GO:0031988;GO:0043226;GO:0043227;GO:0043230;GO:0044421;GO:0044464;GO:0065010;GO:0070062;GO:0072562	78	78	69	509	509	469	18715	0	32331	45744000000	95	923	1.4405e+06	3.21141e+06
0	0	0	18736	17375	0	20123	0	15290	0	52967	54688	43506	49537	41800	41373	65460	59762	41970	0	0	0	0	0	0				activation of immune response;activation of MAPK activity;biological regulation;calcium ion homeostasis;carbohydrate homeostasis;cation homeostasis;cell chemotaxis;cell death;cell migration;cell motility;cell surface receptor linked signaling pathway;cellular calcium ion homeostasis;cellular cation homeostasis;cellular chemical homeostasis;cellular component movement;cellular divalent inorganic c…	binding;chemokine activity;chemokine receptor binding;cytokine activity;cytokine receptor binding;endopeptidase inhibitor activity;endopeptidase regulator activity;enzyme inhibitor activity;enzyme regulator activity;G-protein-coupled receptor binding;peptidase inhibitor activity;peptidase regulator activity;protein binding;receptor binding	cell part;extracellular membrane-bounded organelle;extracellular organelle;extracellular region;extracellular region part;extracellular space;extracellular vesicular exosome;macromolecular complex;membrane attack complex;membrane part;membrane-bounded organelle;membrane-bounded vesicle;organelle;plasma membrane part;pore complex;protein complex;vesicle	Complement and coagulation cascades;Prion diseases;Staphylococcus aureus infection;Systemic lupus erythematosus	3D-structure;Cleavageonpairofbasicresidues;Complementalternatepathway;Complementpathway;Completeproteome;Cytolysis;Directproteinsequencing;Disulfidebond;Glycoprotein;Immunity;Inflammatoryresponse;Innateimmunity;Membraneattackcomplex;Polymorphism;Referenceproteome;Secreted;Signal	GO:0000187;GO:0001701;GO:0001817;GO:0001819;GO:0001932;GO:0002252;GO:0002253;GO:0002376;GO:0002523;GO:0002673;GO:0002682;GO:0002683;GO:0002684;GO:0002685;GO:0002686;GO:0002688;GO:0002689;GO:0002697;GO:0002920;GO:0006464;GO:0006468;GO:0006793;GO:0006796;GO:0006873;GO:0006874;GO:0006875;GO:0006928;GO:0006935;GO:0006950;GO:0006952;GO:0006954;GO:0006955;GO:0006956;GO:0006957;GO:0006958;GO:0006959;GO:…	GO:0001664;GO:0004857;GO:0004866;GO:0005102;GO:0005125;GO:0005126;GO:0005488;GO:0005515;GO:0008009;GO:0030234;GO:0030414;GO:0042379;GO:0061134;GO:0061135	GO:0005576;GO:0005579;GO:0005615;GO:0031982;GO:0031988;GO:0032991;GO:0043226;GO:0043227;GO:0043230;GO:0043234;GO:0044421;GO:0044425;GO:0044459;GO:0044464;GO:0046930;GO:0065010;GO:0070062	3	3	3	2	2	2	1883	0	18326	67874000	82	6	10050.8	22740.1
85540	66870	136030	99650	601860	437810	383910	353290	109150	345670	1008700	64423	472240	186460	1205000	1376100	36016	36525	32045	1030700	1079600	200230	23467	27380	0				biological regulation;blood coagulation;blood coagulation, intrinsic pathway;calcium ion homeostasis;cation homeostasis;cell activation;cellular calcium ion homeostasis;cellular cation homeostasis;cellular chemical homeostasis;cellular divalent inorganic cation homeostasis;cellular homeostasis;cellular ion homeostasis;cellular metal ion homeostasis;cellular process;chemical homeostasis;circulator…	binding;carbohydrate binding;cation binding;cysteine-type endopeptidase inhibitor activity;endopeptidase inhibitor activity;endopeptidase regulator activity;enzyme inhibitor activity;enzyme regulator activity;glycosaminoglycan binding;heparin binding;ion binding;metal ion binding;pattern binding;peptidase inhibitor activity;peptidase regulator activity;polysaccharide binding;protein binding;recep…	blood microparticle;cell part;cytoplasmic membrane-bounded vesicle lumen;cytoplasmic part;cytoplasmic vesicle part;extracellular membrane-bounded organelle;extracellular organelle;extracellular region;extracellular region part;extracellular space;extracellular vesicular exosome;intracellular organelle part;intracellular part;membrane;membrane-bounded organelle;membrane-bounded vesicle;membrane-en…	Complement and coagulation cascades	3D-structure;Alternativesplicing;Bloodcoagulation;Completeproteome;Directproteinsequencing;Disulfidebond;Glycoprotein;Hemostasis;Hydroxylation;Inflammatoryresponse;Phosphoprotein;Polymorphism;Proteaseinhibitor;Pyrrolidonecarboxylicacid;Referenceproteome;Repeat;Secreted;Signal;Thiolproteaseinhibitor;Vasoactive;Vasodilator	GO:0001775;GO:0002576;GO:0003008;GO:0003012;GO:0003013;GO:0003014;GO:0003018;GO:0006810;GO:0006873;GO:0006874;GO:0006875;GO:0006887;GO:0006936;GO:0006939;GO:0006950;GO:0006952;GO:0006954;GO:0007162;GO:0007204;GO:0007596;GO:0007597;GO:0007599;GO:0008152;GO:0009611;GO:0009892;GO:0009987;GO:0010466;GO:0010605;GO:0010941;GO:0010942;GO:0010951;GO:0016192;GO:0019222;GO:0019538;GO:0019725;GO:0030003;GO:…	GO:0001871;GO:0004857;GO:0004866;GO:0004869;GO:0005102;GO:0005488;GO:0005515;GO:0005539;GO:0008201;GO:0008270;GO:0030234;GO:0030246;GO:0030247;GO:0030414;GO:0043167;GO:0043169;GO:0046872;GO:0046914;GO:0061134;GO:0061135	GO:0005576;GO:0005615;GO:0005886;GO:0016020;GO:0031093;GO:0031974;GO:0031982;GO:0031983;GO:0031988;GO:0034774;GO:0043226;GO:0043227;GO:0043230;GO:0043233;GO:0044421;GO:0044422;GO:0044424;GO:0044433;GO:0044444;GO:0044446;GO:0044464;GO:0060205;GO:0065010;GO:0070062;GO:0072562	11	11	11	228	228	228	71957	0	10626	2285600000	35	24	213168	1.67258e+06
148170000	147220000	113640000	220710000	222970000	229140000	266680000	124580000	122300000	117040000	205220000	195860000	112260000	86340000	76730000	61686000	82475000	92886000	84958000	100270000	96559000	93367000	129070000	130160000	122260000				adaptive immune response;anatomical structure homeostasis;antibacterial humoral response;antimicrobial humoral response;biological regulation;defense response;defense response to bacterium;glomerular filtration;homeostatic process;humoral immune response;immune response;immune system process;innate immune response;multicellular organismal process;multi-organism process;positive regulation of biol…	antigen binding;binding;identical protein binding;IgA binding;immunoglobulin binding;protein binding;protein complex binding;protein dimerization activity;protein homodimerization activity	blood microparticle;dimeric IgA immunoglobulin complex;extracellular membrane-bounded organelle;extracellular organelle;extracellular region;extracellular region part;extracellular space;extracellular vesicular exosome;IgA immunoglobulin complex;IgA immunoglobulin complex, circulating;IgM immunoglobulin complex;IgM immunoglobulin complex, circulating;immunoglobulin complex;immunoglobulin complex,…		Completeproteome;Directproteinsequencing;Disulfidebond;Glycoprotein;Proteomicsidentification;Pyrrolidonecarboxylicacid;Referenceproteome;Secreted;Signal	GO:0001894;GO:0001895;GO:0002250;GO:0002376;GO:0003008;GO:0003014;GO:0003094;GO:0006950;GO:0006952;GO:0006955;GO:0006959;GO:0009607;GO:0009617;GO:0009893;GO:0019222;GO:0019730;GO:0019731;GO:0031334;GO:0032459;GO:0032461;GO:0032501;GO:0042592;GO:0042742;GO:0043254;GO:0044087;GO:0045087;GO:0048518;GO:0050789;GO:0050896;GO:0051128;GO:0051130;GO:0051704;GO:0051707;GO:0060249;GO:0060263;GO:0060267;GO:…	GO:0003823;GO:0005488;GO:0005515;GO:0019862;GO:0019865;GO:0032403;GO:0042802;GO:0042803;GO:0046983	GO:0005576;GO:0005615;GO:0019814;GO:0031982;GO:0031988;GO:0032991;GO:0042571;GO:0043226;GO:0043227;GO:0043230;GO:0043234;GO:0044421;GO:0065010;GO:0070062;GO:0071745;GO:0071746;GO:0071748;GO:0071749;GO:0071750;GO:0071751;GO:0071752;GO:0071753;GO:0071754;GO:0071756;GO:0072562	7	7	7	421	421	421	18098	0	58157	37103000000	8	121	5.59815e+07	5.36334e+07
3690800	3087300	2828200	0	0	0	3164200	6291100	6113600	6991100	1037000	709990	4587200	645020	0	0	1850800	0	0	956760	1006100	1949600	2193900	0	1721800				activation of immune response;biological regulation;cellular component organization;cellular component organization or biogenesis;cellular membrane organization;cellular process;complement activation;complement activation, classical pathway;defense response;endocytosis;establishment of localization;humoral immune response;immune effector process;immune response;immune system process;innate immune…	antigen binding;binding	blood microparticle;cell part;extracellular membrane-bounded organelle;extracellular organelle;extracellular region;extracellular region part;extracellular vesicular exosome;membrane;membrane-bounded organelle;membrane-bounded vesicle;organelle;plasma membrane;vesicle		Completeproteome;Directproteinsequencing;Disulfidebond;Immunoglobulindomain;ImmunoglobulinVregion;Referenceproteome	GO:0002252;GO:0002253;GO:0002376;GO:0002682;GO:0002684;GO:0006810;GO:0006897;GO:0006898;GO:0006950;GO:0006952;GO:0006955;GO:0006956;GO:0006958;GO:0006959;GO:0008152;GO:0009987;GO:0010324;GO:0016043;GO:0016044;GO:0016192;GO:0019538;GO:0043170;GO:0044238;GO:0045087;GO:0048518;GO:0048583;GO:0048584;GO:0050776;GO:0050778;GO:0050789;GO:0050896;GO:0051234;GO:0061024;GO:0065007;GO:0071840;GO:0072376	GO:0003823;GO:0005488	GO:0005576;GO:0005886;GO:0016020;GO:0031982;GO:0031988;GO:0043226;GO:0043227;GO:0043230;GO:0044421;GO:0044464;GO:0065010;GO:0070062;GO:0072562	3	3	2	239	239	137	12778	0	20885	325870000	4	6	1.72561e+06	1.03501e+06
34901000	29045000	30647000	26361000	32248000	44401000	32022000	32611000	45551000	41882000	80372000	86715000	36079000	17473000	14934000	14263000	21476000	20839000	19379000	20576000	26065000	25455000	25618000	29553000	24573000				activation of immune response;biological regulation;cellular component organization;cellular component organization or biogenesis;cellular membrane organization;cellular process;complement activation;complement activation, classical pathway;defense response;endocytosis;establishment of localization;humoral immune response;immune effector process;immune response;immune system process;innate immune…	antigen binding;binding	cell part;extracellular membrane-bounded organelle;extracellular organelle;extracellular region;extracellular region part;extracellular space;extracellular vesicular exosome;membrane;membrane-bounded organelle;membrane-bounded vesicle;organelle;plasma membrane;vesicle		Bence-Jonesprotein;Completeproteome;Directproteinsequencing;Disulfidebond;Immunoglobulindomain;ImmunoglobulinVregion;Referenceproteome	GO:0002252;GO:0002253;GO:0002376;GO:0002682;GO:0002684;GO:0006810;GO:0006897;GO:0006898;GO:0006950;GO:0006952;GO:0006955;GO:0006956;GO:0006958;GO:0006959;GO:0008152;GO:0009987;GO:0010324;GO:0016043;GO:0016044;GO:0016192;GO:0019538;GO:0043170;GO:0044238;GO:0045087;GO:0048518;GO:0048583;GO:0048584;GO:0050776;GO:0050778;GO:0050789;GO:0050896;GO:0051234;GO:0061024;GO:0065007;GO:0071840;GO:0072376	GO:0003823;GO:0005488	GO:0005576;GO:0005615;GO:0005886;GO:0016020;GO:0031982;GO:0031988;GO:0043226;GO:0043227;GO:0043230;GO:0044421;GO:0044464;GO:0065010;GO:0070062	3	3	2	405	405	267	12557	0	36767	5446600000	5	31	5.775e+06	8.1161e+06
21867000	20296000	0	0	0	0	18226000	0	524380	0	0	0	0	17824000	13867000	14470000	13696000	13969000	9241100	17242000	19437000	19688000	16965000	17201000	16777000				activation of immune response;biological regulation;cellular component organization;cellular component organization or biogenesis;cellular membrane organization;cellular process;complement activation;complement activation, classical pathway;defense response;endocytosis;establishment of localization;humoral immune response;immune effector process;immune response;immune system process;innate immune…	antigen binding;binding	blood microparticle;cell part;extracellular region;extracellular region part;membrane;plasma membrane		Completeproteome;Directproteinsequencing;Disulfidebond;Immunoglobulindomain;ImmunoglobulinVregion;Referenceproteome	GO:0002252;GO:0002253;GO:0002376;GO:0002682;GO:0002684;GO:0006810;GO:0006897;GO:0006898;GO:0006950;GO:0006952;GO:0006955;GO:0006956;GO:0006958;GO:0006959;GO:0008152;GO:0009987;GO:0010324;GO:0016043;GO:0016044;GO:0016192;GO:0019538;GO:0043170;GO:0044238;GO:0045087;GO:0048518;GO:0048583;GO:0048584;GO:0050776;GO:0050778;GO:0050789;GO:0050896;GO:0051234;GO:0061024;GO:0065007;GO:0071840;GO:0072376	GO:0003823;GO:0005488	GO:0005576;GO:0005886;GO:0016020;GO:0044421;GO:0044464;GO:0072562	2	2	1	261	261	78	12496	0	1348	1866500000	3	19	1.08113e+07	4.61598e+06
6018300	4405700	4205800	6225700	1078000	0	1187500	3280600	548520	496790	13526000	11354000	200600	2465600	2249600	1999700	3467900	395150	0	2207500	2568900	2486600	2502100	7138500	3602000				activation of immune response;biological regulation;cellular component organization;cellular component organization or biogenesis;cellular membrane organization;cellular process;complement activation;complement activation, classical pathway;defense response;endocytosis;establishment of localization;humoral immune response;immune effector process;immune response;immune system process;innate immune…	antigen binding;binding	blood microparticle;cell part;extracellular membrane-bounded organelle;extracellular organelle;extracellular region;extracellular region part;extracellular vesicular exosome;membrane;membrane-bounded organelle;membrane-bounded vesicle;organelle;plasma membrane;vesicle		Bence-Jonesprotein;Completeproteome;Directproteinsequencing;Disulfidebond;Immunoglobulindomain;ImmunoglobulinVregion;Pyrrolidonecarboxylicacid;Referenceproteome	GO:0002252;GO:0002253;GO:0002376;GO:0002682;GO:0002684;GO:0006810;GO:0006897;GO:0006898;GO:0006950;GO:0006952;GO:0006955;GO:0006956;GO:0006958;GO:0006959;GO:0008152;GO:0009987;GO:0010324;GO:0016043;GO:0016044;GO:0016192;GO:0019538;GO:0043170;GO:0044238;GO:0045087;GO:0048518;GO:0048583;GO:0048584;GO:0050776;GO:0050778;GO:0050789;GO:0050896;GO:0051234;GO:0061024;GO:0065007;GO:0071840;GO:0072376	GO:0003823;GO:0005488	GO:0005576;GO:0005886;GO:0016020;GO:0031982;GO:0031988;GO:0043226;GO:0043227;GO:0043230;GO:0044421;GO:0044464;GO:0065010;GO:0070062;GO:0072562	2	2	2	248	248	248	12283	0	1701	1170800000	4	18	2.52593e+06	1.79297e+06
2949800	2811000	2200200	0	125560	0	2595000	0	630210	0	0	0	0	2368700	5984900	3862900	17575000	3537300	16199000	7794100	4841900	7723600	3777400	5380400	9319000				activation of immune response;biological regulation;cellular component organization;cellular component organization or biogenesis;cellular membrane organization;cellular process;complement activation;complement activation, classical pathway;defense response;endocytosis;establishment of localization;humoral immune response;immune effector process;immune response;immune system process;innate immune…	antigen binding;binding	cell part;extracellular region;membrane;plasma membrane		Bence-Jonesprotein;Completeproteome;Directproteinsequencing;Disulfidebond;Immunoglobulindomain;ImmunoglobulinVregion;Pyrrolidonecarboxylicacid;Referenceproteome	GO:0002252;GO:0002253;GO:0002376;GO:0002682;GO:0002684;GO:0006810;GO:0006897;GO:0006898;GO:0006950;GO:0006952;GO:0006955;GO:0006956;GO:0006958;GO:0006959;GO:0008152;GO:0009987;GO:0010324;GO:0016043;GO:0016044;GO:0016192;GO:0019538;GO:0043170;GO:0044238;GO:0045087;GO:0048518;GO:0048583;GO:0048584;GO:0050776;GO:0050778;GO:0050789;GO:0050896;GO:0051234;GO:0061024;GO:0065007;GO:0071840;GO:0072376	GO:0003823;GO:0005488	GO:0005576;GO:0005886;GO:0016020;GO:0044464	2	2	2	137	137	137	12249	0	12102	442880000	3	14	1.40797e+06	6.30273e+06
1402500	1337600	5643800	26760000	18372000	23822000	15790000	2268000	1535600	2287900	0	0	0	0	0	0	24255000	0	0	0	0	0	0	0	546580				activation of immune response;biological regulation;cellular component organization;cellular component organization or biogenesis;cellular membrane organization;cellular process;complement activation;complement activation, classical pathway;defense response;endocytosis;establishment of localization;humoral immune response;immune effector process;immune response;immune system process;innate immune…	antigen binding;binding	cell part;extracellular region;membrane;plasma membrane		3D-structure;Bence-Jonesprotein;Completeproteome;Directproteinsequencing;Disulfidebond;Immunoglobulindomain;ImmunoglobulinVregion;Pyrrolidonecarboxylicacid;Referenceproteome	GO:0002252;GO:0002253;GO:0002376;GO:0002682;GO:0002684;GO:0006810;GO:0006897;GO:0006898;GO:0006950;GO:0006952;GO:0006955;GO:0006956;GO:0006958;GO:0006959;GO:0008152;GO:0009987;GO:0010324;GO:0016043;GO:0016044;GO:0016192;GO:0019538;GO:0043170;GO:0044238;GO:0045087;GO:0048518;GO:0048583;GO:0048584;GO:0050776;GO:0050778;GO:0050789;GO:0050896;GO:0051234;GO:0061024;GO:0065007;GO:0071840;GO:0072376	GO:0003823;GO:0005488	GO:0005576;GO:0005886;GO:0016020;GO:0044464	2	2	2	11	11	11	12382	0	25105	801060000	2	11	1.05442e+07	236257
790090	0	974880	12488000	22846000	15826000	0	2098400	9341400	9226700	0	0	13710000	712530	0	1211500	2426600	8665000	3571600	3090500	4637800	0	2326400	6574500	5947100				activation of immune response;biological regulation;cellular component organization;cellular component organization or biogenesis;cellular membrane organization;cellular process;complement activation;complement activation, classical pathway;defense response;endocytosis;establishment of localization;humoral immune response;immune effector process;immune response;immune system process;innate immune…	antigen binding;binding	cell part;extracellular membrane-bounded organelle;extracellular organelle;extracellular region;extracellular region part;extracellular vesicular exosome;membrane;membrane-bounded organelle;membrane-bounded vesicle;organelle;plasma membrane;vesicle		Bence-Jonesprotein;Completeproteome;Directproteinsequencing;Disulfidebond;Immunoglobulindomain;ImmunoglobulinVregion;Referenceproteome	GO:0002252;GO:0002253;GO:0002376;GO:0002682;GO:0002684;GO:0006810;GO:0006897;GO:0006898;GO:0006950;GO:0006952;GO:0006955;GO:0006956;GO:0006958;GO:0006959;GO:0008152;GO:0009987;GO:0010324;GO:0016043;GO:0016044;GO:0016192;GO:0019538;GO:0043170;GO:0044238;GO:0045087;GO:0048518;GO:0048583;GO:0048584;GO:0050776;GO:0050778;GO:0050789;GO:0050896;GO:0051234;GO:0061024;GO:0065007;GO:0071840;GO:0072376	GO:0003823;GO:0005488	GO:0005576;GO:0005886;GO:0016020;GO:0031982;GO:0031988;GO:0043226;GO:0043227;GO:0043230;GO:0044421;GO:0044464;GO:0065010;GO:0070062	2	2	2	17	17	17	12042	0	3564	662660000	4	35	9.3966e+06	2.2694e+06
1671300	2277800	1158500	8867100	25149000	10162000	4699500	5402700	3640600	2797000	0	0	6057400	1737400	6784500	5038800	4959800	2854200	6603800	1597900	1792800	1407200	2743800	3473900	9708300				activation of immune response;biological regulation;cellular component organization;cellular component organization or biogenesis;cellular membrane organization;cellular process;complement activation;complement activation, classical pathway;defense response;endocytosis;establishment of localization;humoral immune response;immune effector process;immune response;immune system process;innate immune…	antigen binding;binding	blood microparticle;cell part;extracellular membrane-bounded organelle;extracellular organelle;extracellular region;extracellular region part;extracellular vesicular exosome;membrane;membrane-bounded organelle;membrane-bounded vesicle;organelle;plasma membrane;vesicle		Bence-Jonesprotein;Completeproteome;Directproteinsequencing;Disulfidebond;Immunoglobulindomain;ImmunoglobulinVregion;Proteomicsidentification;Referenceproteome	GO:0002252;GO:0002253;GO:0002376;GO:0002682;GO:0002684;GO:0006810;GO:0006897;GO:0006898;GO:0006950;GO:0006952;GO:0006955;GO:0006956;GO:0006958;GO:0006959;GO:0008152;GO:0009987;GO:0010324;GO:0016043;GO:0016044;GO:0016192;GO:0019538;GO:0043170;GO:0044238;GO:0045087;GO:0048518;GO:0048583;GO:0048584;GO:0050776;GO:0050778;GO:0050789;GO:0050896;GO:0051234;GO:0061024;GO:0065007;GO:0071840;GO:0072376	GO:0003823;GO:0005488	GO:0005576;GO:0005886;GO:0016020;GO:0031982;GO:0031988;GO:0043226;GO:0043227;GO:0043230;GO:0044421;GO:0044464;GO:0065010;GO:0070062;GO:0072562	2	1	1	188	98	98	12011	0	19361	1097800000	3	53	8.46e+06	1.58905e+06
24262000	26763000	27512000	23467000	19735000	28942000	25727000	22399000	20901000	26034000	26863000	23226000	22853000	41314000	44265000	31205000	50935000	61043000	47817000	35287000	31406000	36404000	49794000	41206000	43678000				activation of immune response;biological regulation;cellular component organization;cellular component organization or biogenesis;cellular membrane organization;cellular process;complement activation;complement activation, classical pathway;defense response;endocytosis;establishment of localization;humoral immune response;immune effector process;immune response;immune system process;innate immune…	antigen binding;binding	cell part;extracellular membrane-bounded organelle;extracellular organelle;extracellular region;extracellular region part;extracellular vesicular exosome;membrane;membrane-bounded organelle;membrane-bounded vesicle;organelle;plasma membrane;vesicle		Completeproteome;Directproteinsequencing;Glycoprotein;Immunoglobulindomain;ImmunoglobulinVregion;Phosphoprotein;Proteomicsidentification;Pyrrolidonecarboxylicacid;Referenceproteome	GO:0002252;GO:0002253;GO:0002376;GO:0002682;GO:0002684;GO:0006810;GO:0006897;GO:0006898;GO:0006950;GO:0006952;GO:0006955;GO:0006956;GO:0006958;GO:0006959;GO:0008152;GO:0009987;GO:0010324;GO:0016043;GO:0016044;GO:0016192;GO:0019538;GO:0043170;GO:0044238;GO:0045087;GO:0048518;GO:0048583;GO:0048584;GO:0050776;GO:0050778;GO:0050789;GO:0050896;GO:0051234;GO:0061024;GO:0065007;GO:0071840;GO:0072376	GO:0003823;GO:0005488	GO:0005576;GO:0005886;GO:0016020;GO:0031982;GO:0031988;GO:0043226;GO:0043227;GO:0043230;GO:0044421;GO:0044464;GO:0065010;GO:0070062	3	2	1	265	171	77	12943	0	1285	4962600000	5	35	3.05008e+06	7.30414e+06
9112300	9348900	7171000	0	4472500	13393000	20098000	3792400	3502600	3282000	8737200	4310900	0	2301800	1530200	1449800	1629100	2319200	2134400	6604000	2089400	4550700	4956200	2425100	5217700				activation of immune response;biological regulation;cellular component organization;cellular component organization or biogenesis;cellular membrane organization;cellular process;complement activation;complement activation, classical pathway;defense response;endocytosis;establishment of localization;humoral immune response;immune effector process;immune response;immune system process;innate immune…	antigen binding;binding	cell part;extracellular membrane-bounded organelle;extracellular organelle;extracellular region;extracellular region part;extracellular vesicular exosome;membrane;membrane-bounded organelle;membrane-bounded vesicle;organelle;plasma membrane;vesicle		Completeproteome;Directproteinsequencing;Immunoglobulindomain;ImmunoglobulinVregion;Referenceproteome	GO:0002252;GO:0002253;GO:0002376;GO:0002682;GO:0002684;GO:0006810;GO:0006897;GO:0006898;GO:0006950;GO:0006952;GO:0006955;GO:0006956;GO:0006958;GO:0006959;GO:0008152;GO:0009987;GO:0010324;GO:0016043;GO:0016044;GO:0016192;GO:0019538;GO:0043170;GO:0044238;GO:0045087;GO:0048518;GO:0048583;GO:0048584;GO:0050776;GO:0050778;GO:0050789;GO:0050896;GO:0051234;GO:0061024;GO:0065007;GO:0071840;GO:0072376	GO:0003823;GO:0005488	GO:0005576;GO:0005886;GO:0016020;GO:0031982;GO:0031988;GO:0043226;GO:0043227;GO:0043230;GO:0044421;GO:0044464;GO:0065010;GO:0070062	2	1	1	186	93	93	13017	0	7105	1041100000	6	26	6.4212e+06	2.87284e+06
427030016	392160000	354960000	185950000	223250000	556240000	690120000	429030016	391769984	379990016	396760000	327760000	384880000	294240000	389400000	253440000	352470016	395680000	262000000	272280000	168650000	287649984	438649984	446569984	341070016				activation of immune response;anatomical structure homeostasis;biological regulation;cellular component organization;cellular component organization or biogenesis;cellular membrane organization;cellular process;complement activation;complement activation, classical pathway;defense response;endocytosis;establishment of localization;homeostatic process;humoral immune response;immune effector proces…	antigen binding;binding	blood microparticle;cell part;extracellular membrane-bounded organelle;extracellular organelle;extracellular region;extracellular region part;extracellular space;extracellular vesicular exosome;membrane;membrane-bounded organelle;membrane-bounded vesicle;organelle;plasma membrane;vesicle		3D-structure;Completeproteome;Directproteinsequencing;Diseasemutation;Disulfidebond;ImmunoglobulinCregion;Immunoglobulindomain;Referenceproteome	GO:0001894;GO:0001895;GO:0002252;GO:0002253;GO:0002376;GO:0002682;GO:0002684;GO:0006810;GO:0006897;GO:0006898;GO:0006950;GO:0006952;GO:0006955;GO:0006956;GO:0006958;GO:0006959;GO:0008152;GO:0009987;GO:0010324;GO:0016043;GO:0016044;GO:0016192;GO:0019538;GO:0042592;GO:0043170;GO:0044238;GO:0045087;GO:0048518;GO:0048583;GO:0048584;GO:0050776;GO:0050778;GO:0050789;GO:0050896;GO:0051234;GO:0060249;GO:…	GO:0003823;GO:0005488	GO:0005576;GO:0005615;GO:0005886;GO:0016020;GO:0031982;GO:0031988;GO:0043226;GO:0043227;GO:0043230;GO:0044421;GO:0044464;GO:0065010;GO:0070062;GO:0072562	8	8	8	822	822	822	11765	0	32331	98209000000	5	408	1.77169e+08	7.79209e+07
623009984	632120000	648860032	874049984	935369984	1033299968	666190016	791129984	883670016	736179968	525889984	535960000	591320000	511900000	458560000	471430016	775939968	712649984	617820032	637649984	638019968	576190016	711630016	667880000	614510016				adaptive immune response;antibacterial humoral response;antimicrobial humoral response;defense response;defense response to bacterium;defense response to Gram-negative bacterium;humoral immune response;immune response;immune system process;innate immune response;multi-organism process;response to bacterium;response to biotic stimulus;response to other organism;response to stimulus;response to str…	antigen binding;binding	blood microparticle;cell part;cell surface;extracellular membrane-bounded organelle;extracellular organelle;extracellular region part;extracellular space;extracellular vesicular exosome;hexameric IgM immunoglobulin complex;IgM immunoglobulin complex;IgM immunoglobulin complex, circulating;immunoglobulin complex;immunoglobulin complex, circulating;integral to membrane;intrinsic to membrane;macromo…		3D-structure;Alternativesplicing;Cellmembrane;Completeproteome;Directproteinsequencing;Disulfidebond;Glycoprotein;ImmunoglobulinCregion;Immunoglobulindomain;Membrane;Polymorphism;Referenceproteome;Secreted;Transmembrane	GO:0002250;GO:0002376;GO:0006950;GO:0006952;GO:0006955;GO:0006959;GO:0009607;GO:0009617;GO:0019730;GO:0019731;GO:0042742;GO:0045087;GO:0050829;GO:0050896;GO:0051704;GO:0051707	GO:0003823;GO:0005488	GO:0005615;GO:0005886;GO:0009986;GO:0016020;GO:0016021;GO:0019814;GO:0031224;GO:0031982;GO:0031988;GO:0032991;GO:0042571;GO:0043226;GO:0043227;GO:0043230;GO:0043234;GO:0044421;GO:0044425;GO:0044464;GO:0065010;GO:0070062;GO:0071753;GO:0071754;GO:0071756;GO:0071757;GO:0072562	31	31	31	653	653	653	49439	0	32331	6628800000000000	25	1494	1.70046e+08	2.27995e+08
99055000	79265000	88083000	51986000	59735000	54802000	54481000	59213000	67197000	69944000	42355000	29473000	54195000	85674000	97280000	95742000	130060000	104130000	126350000	84608000	100020000	86448000	138760000	141880000	120760000				adrenal gland development;alcohol metabolic process;amine metabolic process;anatomical structure development;anatomical structure morphogenesis;axon regeneration;axonogenesis;biological regulation;biosynthetic process;blood coagulation;blood vessel endothelial cell migration;C21-steroid hormone metabolic process;cell activation;cell migration;cell motility;cell part morphogenesis;cell projection …	alcohol binding;amine binding;apolipoprotein A-I receptor binding;apolipoprotein receptor binding;beta-amyloid binding;binding;cation binding;chemorepellent activity;cholesterol binding;cholesterol transporter activity;enzyme activator activity;enzyme binding;enzyme inhibitor activity;enzyme regulator activity;high-density lipoprotein particle binding;high-density lipoprotein particle receptor bi…	blood microparticle;cell part;cell surface;chylomicron;cytoplasmic membrane-bounded vesicle;cytoplasmic membrane-bounded vesicle lumen;cytoplasmic part;cytoplasmic vesicle;cytoplasmic vesicle part;cytosol;discoidal high-density lipoprotein particle;early endosome;endocytic vesicle;endocytic vesicle lumen;endoplasmic reticulum lumen;endoplasmic reticulum part;endosome;extracellular membrane-bounde…	African trypanosomiasis;Fat digestion and absorption;PPAR signaling pathway;Vitamin digestion and absorption	3D-structure;Amyloid;Amyloidosis;Atherosclerosis;Cholesterolmetabolism;Completeproteome;Directproteinsequencing;Diseasemutation;Glycation;Glycoprotein;HDL;Lipidmetabolism;Lipidtransport;Lipoprotein;Neuropathy;Oxidation;Palmitate;Phosphoprotein;Polymorphism;Proteomicsidentification;Referenceproteome;Repeat;Secreted;Signal;Steroidmetabolism;Sterolmetabolism;Transport	GO:0001523;GO:0001775;GO:0001817;GO:0001818;GO:0001932;GO:0001935;GO:0001959;GO:0001960;GO:0002576;GO:0002682;GO:0002697;GO:0002700;GO:0002718;GO:0002739;GO:0002740;GO:0006066;GO:0006464;GO:0006576;GO:0006629;GO:0006644;GO:0006650;GO:0006656;GO:0006694;GO:0006695;GO:0006720;GO:0006721;GO:0006807;GO:0006810;GO:0006869;GO:0006887;GO:0006897;GO:0006898;GO:0006928;GO:0006935;GO:0006950;GO:0007162;GO:…	GO:0001540;GO:0004857;GO:0005102;GO:0005215;GO:0005319;GO:0005488;GO:0005496;GO:0005515;GO:0005543;GO:0005548;GO:0008035;GO:0008047;GO:0008289;GO:0015248;GO:0015485;GO:0017127;GO:0019899;GO:0022892;GO:0030234;GO:0031210;GO:0032934;GO:0034190;GO:0034191;GO:0042802;GO:0043167;GO:0043169;GO:0043176;GO:0043178;GO:0045499;GO:0050997;GO:0055102;GO:0060228;GO:0070325;GO:0070653;GO:0071813;GO:0071814	GO:0005576;GO:0005615;GO:0005634;GO:0005768;GO:0005769;GO:0005788;GO:0005829;GO:0005886;GO:0009986;GO:0016020;GO:0016023;GO:0030139;GO:0031410;GO:0031974;GO:0031982;GO:0031983;GO:0031988;GO:0032991;GO:0032994;GO:0034358;GO:0034361;GO:0034364;GO:0034365;GO:0034366;GO:0034385;GO:0034774;GO:0042627;GO:0043226;GO:0043227;GO:0043229;GO:0043230;GO:0043231;GO:0043233;GO:0044421;GO:0044422;GO:0044424;GO:…	27	27	27	753	753	753	30777	0	32331	87275000000	18	714	1.89638e+07	1.50031e+07
595480000	569470016	504830016	516710016	524710016	508030016	572360000	320470016	318640000	326849984	360720000	390220000	307540000	310070016	283020000	284600000	346409984	353670016	331289984	274409984	312870016	275860000	381489984	353120000	339780000				acylglycerol catabolic process;acylglycerol metabolic process;aging;alcohol metabolic process;alpha-amino-3-hydroxy-5-methyl-4-isoxazole propionate receptor clustering;anatomical structure morphogenesis;artery morphogenesis;axon regeneration;axonogenesis;biological regulation;biosynthetic process;blood vessel morphogenesis;calcium ion homeostasis;carboxylic acid transport;catabolic process;cation…	antioxidant activity;beta-amyloid binding;binding;carbohydrate binding;cation binding;cholesterol binding;cholesterol transporter activity;cytoskeletal protein binding;enzyme activator activity;enzyme regulator activity;glycosaminoglycan binding;heparin binding;hydroxyapatite binding;identical protein binding;ion binding;lipid binding;lipid transporter activity;lipoprotein particle binding;lipopr…	blood microparticle;cell body;cell part;cell projection;chylomicron;cytoplasm;cytoplasmic membrane-bounded vesicle lumen;cytoplasmic part;cytoplasmic vesicle part;cytoskeletal part;dendrite;discoidal high-density lipoprotein particle;early endosome;endocytic vesicle lumen;endoplasmic reticulum;endosome;envelope;extracellular matrix;extracellular membrane-bounded organelle;extracellular organelle;…	Alzheimer's disease	3D-structure;Alzheimerdisease;Amyloidosis;Cholesterolmetabolism;Chylomicron;Completeproteome;Directproteinsequencing;Diseasemutation;Glycation;Glycoprotein;HDL;Heparin-binding;Hyperlipidemia;Lipidmetabolism;Lipidtransport;Neurodegeneration;Oxidation;Phosphoprotein;Polymorphism;Proteomicsidentification;Referenceproteome;Repeat;Secreted;Signal;Steroidmetabolism;Sterolmetabolism;Transport;VLDL	GO:0000302;GO:0001523;GO:0001558;GO:0001932;GO:0001936;GO:0001937;GO:0002021;GO:0003008;GO:0003013;GO:0003018;GO:0006066;GO:0006140;GO:0006469;GO:0006629;GO:0006638;GO:0006639;GO:0006641;GO:0006662;GO:0006706;GO:0006707;GO:0006720;GO:0006721;GO:0006810;GO:0006869;GO:0006873;GO:0006874;GO:0006875;GO:0006897;GO:0006898;GO:0006950;GO:0006979;GO:0006996;GO:0007010;GO:0007154;GO:0007165;GO:0007166;GO:…	GO:0001540;GO:0001871;GO:0005102;GO:0005215;GO:0005319;GO:0005488;GO:0005496;GO:0005515;GO:0005539;GO:0005543;GO:0008047;GO:0008092;GO:0008201;GO:0008289;GO:0015248;GO:0015485;GO:0016209;GO:0017127;GO:0022892;GO:0030234;GO:0030246;GO:0030247;GO:0032934;GO:0042802;GO:0042803;GO:0043167;GO:0043169;GO:0046848;GO:0046872;GO:0046911;GO:0046983;GO:0048156;GO:0050750;GO:0060228;GO:0070325;GO:0070326;GO:…	GO:0000323;GO:0005576;GO:0005615;GO:0005634;GO:0005635;GO:0005737;GO:0005764;GO:0005768;GO:0005769;GO:0005770;GO:0005773;GO:0005783;GO:0005794;GO:0005874;GO:0005886;GO:0016020;GO:0019897;GO:0019898;GO:0030425;GO:0031012;GO:0031232;GO:0031967;GO:0031974;GO:0031975;GO:0031982;GO:0031983;GO:0031988;GO:0032991;GO:0032994;GO:0034358;GO:0034361;GO:0034362;GO:0034363;GO:0034364;GO:0034365;GO:0034385;GO:…	33	33	33	785	785	785	36154	0	32331	3703600000000000	22	1428	3.6537e+07	9.73669e+07
45918000	37954000	35849000	144290000	142860000	132230000	70403000	90139000	96555000	86305000	10905000	10124000	76066000	42509000	51777000	45643000	63034000	68523000	81494000	46471000	39822000	39469000	63264000	63990000	70064000				acute inflammatory response;acylglycerol catabolic process;acylglycerol metabolic process;alcohol metabolic process;amine metabolic process;anatomical structure morphogenesis;biological regulation;biosynthetic process;catabolic process;cellular amine metabolic process;cellular biogenic amine metabolic process;cellular biosynthetic process;cellular catabolic process;cellular component assembly;cel…	alcohol binding;amine binding;apolipoprotein receptor binding;binding;cation binding;cholesterol binding;cholesterol transporter activity;enzyme activator activity;enzyme inhibitor activity;enzyme regulator activity;high-density lipoprotein particle binding;high-density lipoprotein particle receptor binding;identical protein binding;ion binding;lipase inhibitor activity;lipid binding;lipid transp…	blood microparticle;cell part;chylomicron;cytoplasmic part;cytosol;early endosome;endoplasmic reticulum lumen;endoplasmic reticulum part;endosome;extracellular membrane-bounded organelle;extracellular organelle;extracellular region;extracellular region part;extracellular vesicular exosome;high-density lipoprotein particle;intracellular membrane-bounded organelle;intracellular organelle;intracellu…	PPAR signaling pathway	3D-structure;Cleavageonpairofbasicresidues;Completeproteome;Directproteinsequencing;Disulfidebond;Glycoprotein;HDL;Host-virusinteraction;Lipidtransport;Oxidation;Phosphoprotein;Proteomicsidentification;Pyrrolidonecarboxylicacid;Referenceproteome;Secreted;Signal;Transport	GO:0001523;GO:0001817;GO:0002526;GO:0002682;GO:0002697;GO:0002700;GO:0002718;GO:0002739;GO:0002740;GO:0006066;GO:0006457;GO:0006464;GO:0006576;GO:0006629;GO:0006638;GO:0006639;GO:0006641;GO:0006644;GO:0006650;GO:0006656;GO:0006662;GO:0006720;GO:0006721;GO:0006807;GO:0006810;GO:0006869;GO:0006950;GO:0006952;GO:0006954;GO:0007165;GO:0007602;GO:0007603;GO:0008152;GO:0008202;GO:0008203;GO:0008610;GO:…	GO:0004857;GO:0005102;GO:0005215;GO:0005319;GO:0005488;GO:0005496;GO:0005515;GO:0005543;GO:0008035;GO:0008047;GO:0008289;GO:0015248;GO:0015485;GO:0017127;GO:0022892;GO:0030234;GO:0031210;GO:0032934;GO:0034190;GO:0042802;GO:0042803;GO:0043167;GO:0043169;GO:0043176;GO:0043178;GO:0046982;GO:0046983;GO:0050997;GO:0055102;GO:0060228;GO:0070325;GO:0070653;GO:0071813;GO:0071814	GO:0005576;GO:0005768;GO:0005769;GO:0005788;GO:0005829;GO:0031974;GO:0031982;GO:0031988;GO:0032991;GO:0032994;GO:0034358;GO:0034361;GO:0034364;GO:0034366;GO:0034385;GO:0042627;GO:0043226;GO:0043227;GO:0043229;GO:0043230;GO:0043231;GO:0043233;GO:0044421;GO:0044422;GO:0044424;GO:0044432;GO:0044444;GO:0044446;GO:0044464;GO:0065010;GO:0070013;GO:0070062;GO:0072562	6	6	6	495	495	495	10649	0	94981	21943000000	5	205	5.07171e+07	8.65276e+06
394020000	321780000	699129984	406820000	273830016	343220000	448260000	840230016	799950016	897560000	825360000	889280000	923200000	2217900032	2149499904	2287500032	2498700032	1569799936	1950899968	2399099904	2435899904	2419000064	2324199936	2577400064	2354700032				acylglycerol metabolic process;alcohol metabolic process;biological regulation;cellular component assembly;cellular component organization;cellular component organization or biogenesis;cellular lipid metabolic process;cellular macromolecule metabolic process;cellular metabolic process;cellular process;cholesterol efflux;cholesterol metabolic process;cholesterol transport;chylomicron remnant clear…	alcohol binding;amine binding;binding;carboxylic acid binding;cation binding;enzyme activator activity;enzyme inhibitor activity;enzyme regulator activity;fatty acid binding;ion binding;lipase inhibitor activity;lipid binding;monocarboxylic acid binding;phosphatidylcholine binding;phosphatidylcholine-sterol O-acyltransferase activator activity;phospholipase inhibitor activity;phospholipid binding…	cell part;chylomicron;cytoplasmic part;endoplasmic reticulum;extracellular membrane-bounded organelle;extracellular organelle;extracellular region;extracellular region part;extracellular vesicular exosome;high-density lipoprotein particle;intracellular membrane-bounded organelle;intracellular organelle;intracellular part;macromolecular complex;membrane-bounded organelle;membrane-bounded vesicle;o…		3D-structure;Completeproteome;Directproteinsequencing;Lipidtransport;Polymorphism;Proteomicsidentification;Referenceproteome;Secreted;Signal;Transport;VLDL	GO:0006066;GO:0006629;GO:0006638;GO:0006639;GO:0006641;GO:0006662;GO:0006810;GO:0006869;GO:0008152;GO:0008202;GO:0008203;GO:0009889;GO:0009890;GO:0009892;GO:0009893;GO:0009894;GO:0009895;GO:0009987;GO:0010565;GO:0010872;GO:0010873;GO:0010899;GO:0010900;GO:0010915;GO:0010916;GO:0010984;GO:0010985;GO:0015914;GO:0015918;GO:0016043;GO:0016125;GO:0018904;GO:0019216;GO:0019217;GO:0019218;GO:0019222;GO:…	GO:0004857;GO:0004859;GO:0005488;GO:0005504;GO:0005543;GO:0008047;GO:0008289;GO:0030234;GO:0031210;GO:0031406;GO:0033293;GO:0043167;GO:0043169;GO:0043176;GO:0043178;GO:0050997;GO:0055102;GO:0060228	GO:0005576;GO:0005783;GO:0031982;GO:0031988;GO:0032991;GO:0032994;GO:0034358;GO:0034361;GO:0034364;GO:0034385;GO:0042627;GO:0043226;GO:0043227;GO:0043229;GO:0043230;GO:0043231;GO:0044421;GO:0044424;GO:0044444;GO:0044464;GO:0065010;GO:0070062	9	9	9	542	542	542	93318	0	82991	1669900000000000	3	759	1.39085e+08	1.25373e+08
3147100	2920900	3020800	4387500	6130600	6452200	5373100	2478200	4429400	3068900	2509600	3192200	3857700	4642200	4609800	3946700	2878900	5313900	4913600	2332900	1395300	1532600	2696700	2376100	4130800				antibacterial humoral response;antimicrobial humoral response;biological adhesion;biological regulation;blood coagulation;blood coagulation, common pathway;cell activation;cell adhesion;cell-cell adhesion;cell-matrix adhesion;cell-substrate adhesion;cellular component assembly;cellular component assembly at cellular level;cellular component organization;cellular component organization at cellular…	structural molecule activity	blood microparticle;cell cortex;cell part;cell surface;cytoplasmic membrane-bounded vesicle;cytoplasmic membrane-bounded vesicle lumen;cytoplasmic part;cytoplasmic vesicle;cytoplasmic vesicle part;external side of plasma membrane;extracellular membrane-bounded organelle;extracellular organelle;extracellular region;extracellular region part;extracellular space;extracellular vesicular exosome;fibri…	Complement and coagulation cascades	3D-structure;Adaptiveimmunity;Alternativesplicing;Amyloid;Amyloidosis;Bloodcoagulation;Coiledcoil;Completeproteome;Directproteinsequencing;Diseasemutation;Disulfidebond;Glycoprotein;Hemostasis;Hydroxylation;Immunity;Innateimmunity;Isopeptidebond;Phosphoprotein;Polymorphism;Referenceproteome;Secreted;Signal	GO:0001775;GO:0002376;GO:0002576;GO:0002791;GO:0002793;GO:0006461;GO:0006810;GO:0006887;GO:0006950;GO:0006952;GO:0006955;GO:0006959;GO:0007155;GO:0007160;GO:0007165;GO:0007596;GO:0007599;GO:0008152;GO:0009607;GO:0009617;GO:0009892;GO:0009966;GO:0009967;GO:0009987;GO:0010035;GO:0010038;GO:0010470;GO:0010605;GO:0010627;GO:0010646;GO:0010647;GO:0010740;GO:0010941;GO:0016043;GO:0016192;GO:0016337;GO:…	GO:0005198	GO:0005576;GO:0005577;GO:0005615;GO:0005886;GO:0005938;GO:0009897;GO:0009986;GO:0016020;GO:0016023;GO:0030141;GO:0031091;GO:0031093;GO:0031410;GO:0031974;GO:0031982;GO:0031983;GO:0031988;GO:0032991;GO:0034774;GO:0043226;GO:0043227;GO:0043229;GO:0043230;GO:0043231;GO:0043233;GO:0043234;GO:0044421;GO:0044422;GO:0044424;GO:0044425;GO:0044433;GO:0044444;GO:0044446;GO:0044459;GO:0044464;GO:0060205;GO:…	21	21	21	311	311	311	94972	0	23599	8528000000	35	172	1.51416e+06	1.3859e+06
2699600	2690800	2284000	5942600	4342500	7234000	4370000	4767600	4062900	2800000	8981300	5982200	5952900	4413400	2594900	2621000	3803700	5080800	5238100	2922000	2351800	2386100	3718300	4522700	2365600				antibacterial humoral response;antimicrobial humoral response;biological adhesion;biological regulation;blood coagulation;cell activation;cell adhesion;cell-cell adhesion;cell-matrix adhesion;cell-substrate adhesion;cellular component assembly;cellular component assembly at cellular level;cellular component organization;cellular component organization at cellular level;cellular component organiza…	binding;chaperone binding;protein binding;structural molecule activity	blood microparticle;cell cortex;cell part;cell surface;cytoplasmic membrane-bounded vesicle;cytoplasmic membrane-bounded vesicle lumen;cytoplasmic part;cytoplasmic vesicle;cytoplasmic vesicle part;external side of plasma membrane;extracellular membrane-bounded organelle;extracellular organelle;extracellular region;extracellular region part;extracellular space;extracellular vesicular exosome;fibri…	Complement and coagulation cascades	3D-structure;Adaptiveimmunity;Bloodcoagulation;Coiledcoil;Completeproteome;Directproteinsequencing;Diseasemutation;Disulfidebond;Glycoprotein;Hemostasis;Immunity;Innateimmunity;Polymorphism;Proteomicsidentification;Pyrrolidonecarboxylicacid;Referenceproteome;Secreted;Signal	GO:0001775;GO:0002376;GO:0002576;GO:0002791;GO:0002793;GO:0006461;GO:0006810;GO:0006887;GO:0006950;GO:0006952;GO:0006955;GO:0006959;GO:0007155;GO:0007160;GO:0007165;GO:0007596;GO:0007599;GO:0009607;GO:0009617;GO:0009719;GO:0009725;GO:0009966;GO:0009967;GO:0009987;GO:0010033;GO:0010035;GO:0010038;GO:0010470;GO:0010627;GO:0010646;GO:0010647;GO:0010740;GO:0010941;GO:0016043;GO:0016192;GO:0016337;GO:…	GO:0005198;GO:0005488;GO:0005515;GO:0051087	GO:0005576;GO:0005577;GO:0005615;GO:0005886;GO:0005938;GO:0009897;GO:0009986;GO:0016020;GO:0016023;GO:0030141;GO:0031091;GO:0031093;GO:0031410;GO:0031974;GO:0031982;GO:0031983;GO:0031988;GO:0032991;GO:0034774;GO:0043226;GO:0043227;GO:0043229;GO:0043230;GO:0043231;GO:0043233;GO:0043234;GO:0044421;GO:0044422;GO:0044424;GO:0044425;GO:0044433;GO:0044444;GO:0044446;GO:0044459;GO:0044464;GO:0060205;GO:…	13	13	13	34	34	34	55928	0	10359	4836100000	29	68	1.84784e+06	1.35579e+06
210310	273780	221940	343930	349690	331150	416780	0	0	0	4297500	5017500	1046600	894050	826570	811580	594720	759410	774320	0	182610	197320	324100	316790	302890				activation of immune response;biological regulation;cell communication;cell-cell signaling;cellular process;complement activation;complement activation, classical pathway;defense response;humoral immune response;immune effector process;immune response;immune system process;innate immune response;macromolecule metabolic process;metabolic process;positive regulation of biological process;positive r…		collagen;complement component C1 complex;extracellular matrix part;extracellular membrane-bounded organelle;extracellular organelle;extracellular region;extracellular region part;extracellular vesicular exosome;macromolecular complex;membrane-bounded organelle;membrane-bounded vesicle;organelle;protein complex;vesicle	Chagas disease (American trypanosomiasis);Complement and coagulation cascades;Prion diseases;Staphylococcus aureus infection;Systemic lupus erythematosus	3D-structure;Collagen;Complementpathway;Completeproteome;Directproteinsequencing;Disulfidebond;Glycoprotein;Hydroxylation;Immunity;Innateimmunity;Polymorphism;Proteomicsidentification;Referenceproteome;Repeat;Secreted;Signal	GO:0002252;GO:0002253;GO:0002376;GO:0002682;GO:0002684;GO:0006950;GO:0006952;GO:0006955;GO:0006956;GO:0006958;GO:0006959;GO:0007154;GO:0007267;GO:0008152;GO:0009987;GO:0019538;GO:0023052;GO:0043170;GO:0044238;GO:0045087;GO:0048518;GO:0048583;GO:0048584;GO:0050776;GO:0050778;GO:0050789;GO:0050896;GO:0065007;GO:0072376		GO:0005576;GO:0005581;GO:0005602;GO:0031982;GO:0031988;GO:0032991;GO:0043226;GO:0043227;GO:0043230;GO:0043234;GO:0044420;GO:0044421;GO:0065010;GO:0070062	2	2	2	95	95	95	23351	0	12487	409900000	12	10	74731.3	468960
1544200	1495900	1397400	157600	416520	524990	136700	609220	747340	579660	718410	491720	587810	4848200	4229200	4167300	3622700	4091100	3795200	1173200	1028200	505460	983990	1061600	985110				activation of immune response;biological regulation;complement activation;complement activation, classical pathway;defense response;humoral immune response;immune effector process;immune response;immune system process;innate immune response;macromolecule metabolic process;metabolic process;negative regulation of biological process;negative regulation of cell differentiation;negative regulation of…		blood microparticle;collagen;extracellular matrix part;extracellular membrane-bounded organelle;extracellular organelle;extracellular region;extracellular region part;extracellular space;extracellular vesicular exosome;membrane-bounded organelle;membrane-bounded vesicle;organelle;vesicle	Chagas disease (American trypanosomiasis);Complement and coagulation cascades;Prion diseases;Staphylococcus aureus infection;Systemic lupus erythematosus	3D-structure;Collagen;Complementpathway;Completeproteome;Directproteinsequencing;Diseasemutation;Disulfidebond;Glycoprotein;Hydroxylation;Immunity;Innateimmunity;Referenceproteome;Repeat;Secreted;Signal	GO:0002252;GO:0002253;GO:0002376;GO:0002682;GO:0002684;GO:0002761;GO:0002762;GO:0006950;GO:0006952;GO:0006955;GO:0006956;GO:0006958;GO:0006959;GO:0008152;GO:0019538;GO:0030852;GO:0030853;GO:0043170;GO:0044238;GO:0045087;GO:0045595;GO:0045596;GO:0045637;GO:0045638;GO:0045649;GO:0045650;GO:0048518;GO:0048519;GO:0048523;GO:0048583;GO:0048584;GO:0050776;GO:0050778;GO:0050789;GO:0050793;GO:0050794;GO:…		GO:0005576;GO:0005581;GO:0005615;GO:0031982;GO:0031988;GO:0043226;GO:0043227;GO:0043230;GO:0044420;GO:0044421;GO:0065010;GO:0070062;GO:0072562	5	5	5	253	253	253	25773	0	40975	1721200000	13	58	641556	988276
268550	293640	373220	848400	813540	962300	0	10494000	8634100	10778000	1627700	982080	9698200	9605000	7499700	7891800	5615900	11717000	5949700	4340900	3503100	3028800	3579900	3762200	3685600				acylglycerol metabolic process;acylglycerol transport;biological regulation;blood coagulation, intrinsic pathway;cellular lipid metabolic process;cellular metabolic process;cellular process;establishment of localization;glycerol ether metabolic process;glycerolipid metabolic process;lipid metabolic process;lipid transport;macromolecule metabolic process;metabolic process;negative regulation of an…	binding;carbohydrate binding;enzyme activator activity;enzyme regulator activity;glycoprotein binding;glycosaminoglycan binding;heparin binding;identical protein binding;lipase activator activity;lipid binding;lipoprotein lipase activator activity;pattern binding;phospholipid binding;polysaccharide binding;protein binding	cell part;cell surface;chylomicron;extracellular membrane-bounded organelle;extracellular organelle;extracellular region part;extracellular space;extracellular vesicular exosome;high-density lipoprotein particle;macromolecular complex;membrane-bounded organelle;membrane-bounded vesicle;organelle;plasma lipoprotein particle;protein-lipid complex;triglyceride-rich lipoprotein particle;very-low-dens…		3D-structure;Completeproteome;Directproteinsequencing;Disulfidebond;Glycoprotein;Heparin-binding;Polymorphism;Proteomicsidentification;Referenceproteome;Repeat;Secreted;Signal;Sushi	GO:0001936;GO:0001937;GO:0006629;GO:0006638;GO:0006639;GO:0006641;GO:0006662;GO:0006810;GO:0006869;GO:0007597;GO:0008152;GO:0008285;GO:0009987;GO:0010594;GO:0010596;GO:0010656;GO:0010660;GO:0010941;GO:0016485;GO:0016525;GO:0018904;GO:0019222;GO:0019538;GO:0022603;GO:0030193;GO:0030194;GO:0030195;GO:0030334;GO:0030336;GO:0031638;GO:0031639;GO:0032101;GO:0032879;GO:0033032;GO:0033033;GO:0034196;GO:…	GO:0001871;GO:0001948;GO:0005488;GO:0005515;GO:0005539;GO:0005543;GO:0008047;GO:0008201;GO:0008289;GO:0030234;GO:0030246;GO:0030247;GO:0042802;GO:0060229;GO:0060230	GO:0005615;GO:0009986;GO:0031982;GO:0031988;GO:0032991;GO:0032994;GO:0034358;GO:0034361;GO:0034364;GO:0034385;GO:0042627;GO:0043226;GO:0043227;GO:0043230;GO:0044421;GO:0044464;GO:0065010;GO:0070062	7	7	7	243	243	243	38298	0	50793	3018900000	17	46	364035	321348
28650	27555	32394	157180	292880	289000	93383	230150	261470	235370	145780	224010	322790	221980	261490	207860	139340	373630	251310	27341	50161	84759	128620	115640	170040				acute inflammatory response;acute-phase response;anatomical structure formation involved in morphogenesis;anatomical structure morphogenesis;angiogenesis;biological adhesion;biological regulation;blood coagulation;calcium-independent cell-matrix adhesion;cell activation;cell adhesion;cell differentiation;cell junction assembly;cell junction organization;cell migration;cell morphogenesis;cell morp…	binding;carbohydrate binding;collagen binding;enzyme activator activity;enzyme binding;enzyme regulator activity;glycosaminoglycan binding;heparin binding;integrin binding;pattern binding;peptidase activator activity;peptidase regulator activity;polysaccharide binding;protease binding;protein binding;protein complex binding;receptor binding	apical plasma membrane;basal lamina;blood microparticle;cell part;cytoplasmic membrane-bounded vesicle lumen;cytoplasmic part;cytoplasmic vesicle part;endoplasmic reticulum-Golgi intermediate compartment;extracellular matrix;extracellular matrix part;extracellular membrane-bounded organelle;extracellular organelle;extracellular region;extracellular region part;extracellular space;extracellular ve…	Amoebiasis;Bacterial invasion of epithelial cells;ECM-receptor interaction;Focal adhesion;Pathways in cancer;Regulation of actin cytoskeleton;Small cell lung cancer	3D-structure;Acutephase;Alternativesplicing;Angiogenesis;Celladhesion;Cellshape;Completeproteome;Directproteinsequencing;Diseasemutation;Disulfidebond;Extracellularmatrix;Glycoprotein;Heparin-binding;Isopeptidebond;Phosphoprotein;Polymorphism;Pyrrolidonecarboxylicacid;Referenceproteome;Repeat;Secreted;Signal;Sulfation	GO:0000902;GO:0000904;GO:0001525;GO:0001558;GO:0001775;GO:0002376;GO:0002526;GO:0002576;GO:0006461;GO:0006464;GO:0006810;GO:0006887;GO:0006928;GO:0006950;GO:0006952;GO:0006953;GO:0006954;GO:0007044;GO:0007155;GO:0007160;GO:0007161;GO:0007596;GO:0007599;GO:0008152;GO:0008360;GO:0009611;GO:0009653;GO:0009987;GO:0010720;GO:0010769;GO:0010975;GO:0016043;GO:0016192;GO:0016477;GO:0018149;GO:0019538;GO:…	GO:0001871;GO:0002020;GO:0005102;GO:0005178;GO:0005488;GO:0005515;GO:0005518;GO:0005539;GO:0008047;GO:0008201;GO:0016504;GO:0019899;GO:0030234;GO:0030246;GO:0030247;GO:0032403;GO:0061134	GO:0005576;GO:0005577;GO:0005605;GO:0005615;GO:0005793;GO:0016324;GO:0031012;GO:0031093;GO:0031974;GO:0031982;GO:0031983;GO:0031988;GO:0032991;GO:0034774;GO:0043226;GO:0043227;GO:0043229;GO:0043230;GO:0043231;GO:0043233;GO:0043234;GO:0044420;GO:0044421;GO:0044422;GO:0044424;GO:0044425;GO:0044433;GO:0044444;GO:0044446;GO:0044459;GO:0044464;GO:0060205;GO:0065010;GO:0070062;GO:0072562	8	8	8	39	39	39	27232	0	72284	945190000	96	60	118439	79280.3
518180	480440	523300	470910	1321800	691470	1118400	487300	324470	357110	1032200	958030	1012000	1018100	640910	675570	1338700	838140	799950	161940	232460	395640	271570	628690	272350				biological adhesion;biological regulation;catabolic process;cell adhesion;cellular catabolic process;cellular component organization;cellular component organization or biogenesis;cellular macromolecule metabolic process;cellular membrane organization;cellular metabolic process;cellular nitrogen compound catabolic process;cellular nitrogen compound metabolic process;cellular process;cellular prote…	binding;calcium channel inhibitor activity;calcium channel regulator activity;calcium oxalate binding;cation binding;channel inhibitor activity;channel regulator activity;endopeptidase inhibitor activity;endopeptidase regulator activity;enzyme inhibitor activity;enzyme regulator activity;heme binding;identical protein binding;IgA binding;immunoglobulin binding;ion binding;ion channel inhibitor ac…	blood microparticle;cell part;cell surface;extracellular membrane-bounded organelle;extracellular organelle;extracellular region;extracellular region part;extracellular space;extracellular vesicular exosome;intracellular membrane-bounded organelle;intracellular organelle;intracellular part;membrane;membrane-bounded organelle;membrane-bounded vesicle;organelle;plasma membrane;vesicle		3D-structure;Chromophore;Cleavageonpairofbasicresidues;Completeproteome;Directproteinsequencing;Disulfidebond;Glycoprotein;Host-virusinteraction;Proteaseinhibitor;Proteomicsidentification;Referenceproteome;Repeat;Secreted;Serineproteaseinhibitor;Signal	GO:0002682;GO:0002683;GO:0006464;GO:0006778;GO:0006787;GO:0006807;GO:0006810;GO:0006897;GO:0006898;GO:0007155;GO:0007565;GO:0008152;GO:0009056;GO:0009057;GO:0009966;GO:0009968;GO:0009987;GO:0010324;GO:0010466;GO:0010627;GO:0010646;GO:0010648;GO:0010741;GO:0010951;GO:0016032;GO:0016043;GO:0016044;GO:0016192;GO:0018298;GO:0019222;GO:0019538;GO:0022414;GO:0022610;GO:0023051;GO:0023057;GO:0030163;GO:…	GO:0004857;GO:0004866;GO:0004867;GO:0005246;GO:0005488;GO:0005506;GO:0005515;GO:0008200;GO:0016247;GO:0016248;GO:0019855;GO:0019862;GO:0019865;GO:0020037;GO:0030234;GO:0030414;GO:0032403;GO:0042802;GO:0042803;GO:0043167;GO:0043169;GO:0046872;GO:0046904;GO:0046906;GO:0046914;GO:0046983;GO:0061134;GO:0061135	GO:0005576;GO:0005615;GO:0005886;GO:0009986;GO:0016020;GO:0031982;GO:0031988;GO:0043226;GO:0043227;GO:0043229;GO:0043230;GO:0043231;GO:0044421;GO:0044424;GO:0044464;GO:0065010;GO:0070062;GO:0072562	4	4	4	165	165	165	38999	0	29782	654400000	16	25	346299	748388
0	0	0	0	187080	143600	0	754880	504800	375330	670370	840530	479610	133790	163440	1425800	606670	620940	836640	472770	382770	426640	458580	419370	0				acute inflammatory response;acute-phase response;biological regulation;defense response;establishment of localization;inflammatory response;negative regulation of biological process;negative regulation of cytokine production;negative regulation of interleukin-6 production;negative regulation of multicellular organismal process;negative regulation of tumor necrosis factor production;regulation of …		blood microparticle;extracellular membrane-bounded organelle;extracellular organelle;extracellular region;extracellular region part;extracellular space;extracellular vesicular exosome;membrane-bounded organelle;membrane-bounded vesicle;organelle;vesicle		3D-structure;Acutephase;Completeproteome;Directproteinsequencing;Disulfidebond;Glycoprotein;Polymorphism;Pyrrolidonecarboxylicacid;Referenceproteome;Secreted;Signal;Transport	GO:0001817;GO:0001818;GO:0002526;GO:0002682;GO:0006810;GO:0006950;GO:0006952;GO:0006953;GO:0006954;GO:0009611;GO:0032675;GO:0032680;GO:0032715;GO:0032720;GO:0048519;GO:0050789;GO:0050896;GO:0051234;GO:0051239;GO:0051241;GO:0065007		GO:0005576;GO:0005615;GO:0031982;GO:0031988;GO:0043226;GO:0043227;GO:0043230;GO:0044421;GO:0065010;GO:0070062;GO:0072562	3	3	3	119	119	119	23511	0	24023	255280000	10	8	81648.2	252590
8116900	8571500	9652900	0	0	0	87216	195250	386010	2706100	3648200	3497400	2140600	7268300	6345500	8004400	8472300	13657000	7527300	6279900	5376300	4978500	8398100	9808700	8898800				biological regulation;blood coagulation;cell activation;cell chemotaxis;cell migration;cell motility;cell surface receptor linked signaling pathway;cellular component movement;cellular process;cellular response to chemical stimulus;cellular response to cytokine stimulus;cellular response to organic substance;cellular response to stimulus;chemokine-mediated signaling pathway;chemotaxis;coagulation…	binding;carbohydrate binding;chemokine activity;chemokine receptor binding;CXCR chemokine receptor binding;CXCR3 chemokine receptor binding;cytokine activity;cytokine receptor binding;glycosaminoglycan binding;G-protein-coupled receptor binding;heparin binding;pattern binding;polysaccharide binding;protein binding;receptor binding	cell part;cytoplasmic membrane-bounded vesicle lumen;cytoplasmic part;cytoplasmic vesicle part;extracellular region;extracellular region part;extracellular space;intracellular organelle part;intracellular part;membrane-enclosed lumen;organelle lumen;organelle part;platelet alpha granule lumen;secretory granule lumen;vesicle lumen	Chemokine signaling pathway;Cytokine-cytokine receptor interaction	3D-structure;Chemotaxis;Completeproteome;Cytokine;Directproteinsequencing;Disulfidebond;Glycoprotein;Heparin-binding;Proteoglycan;Referenceproteome;Secreted;Signal	GO:0001775;GO:0001817;GO:0001819;GO:0002237;GO:0002376;GO:0002576;GO:0002682;GO:0002684;GO:0002685;GO:0002687;GO:0002688;GO:0002690;GO:0002761;GO:0002763;GO:0006140;GO:0006355;GO:0006357;GO:0006810;GO:0006887;GO:0006928;GO:0006935;GO:0006950;GO:0006952;GO:0006954;GO:0006955;GO:0007165;GO:0007166;GO:0007186;GO:0007596;GO:0007599;GO:0009605;GO:0009607;GO:0009611;GO:0009889;GO:0009890;GO:0009891;GO:…	GO:0001664;GO:0001871;GO:0005102;GO:0005125;GO:0005126;GO:0005488;GO:0005515;GO:0005539;GO:0008009;GO:0008201;GO:0030246;GO:0030247;GO:0042379;GO:0045236;GO:0048248	GO:0005576;GO:0005615;GO:0031093;GO:0031974;GO:0031983;GO:0034774;GO:0043233;GO:0044421;GO:0044422;GO:0044424;GO:0044433;GO:0044444;GO:0044446;GO:0044464;GO:0060205	4	4	4	356	356	356	10845	0	66214	900980000	4	34	4.7039e+06	3.55636e+06
391620	535270	901440	841240	930390	703040	1419400	7204900	7098900	5323900	10229000	7352500	8605400	14104000	9428600	9365600	6157900	5805400	6845200	3464700	2842800	3499200	5420100	3498100	3937700				anatomical structure homeostasis;biological regulation;blood coagulation;cation homeostasis;cation transport;cell activation;cellular cation homeostasis;cellular chemical homeostasis;cellular homeostasis;cellular ion homeostasis;cellular iron ion homeostasis;cellular metal ion homeostasis;cellular process;chemical homeostasis;coagulation;establishment of localization;establishment of localization…	binding;cation binding;cation transmembrane transporter activity;ferric iron binding;ferric iron transmembrane transporter activity;inorganic cation transmembrane transporter activity;ion binding;ion transmembrane transporter activity;iron ion binding;iron ion transmembrane transporter activity;metal ion binding;metal ion transmembrane transporter activity;substrate-specific transmembrane transpo…	apical plasma membrane;basal part of cell;basal plasma membrane;blood microparticle;cell part;cell surface;coated pit;cytoplasmic membrane-bounded vesicle;cytoplasmic membrane-bounded vesicle lumen;cytoplasmic part;cytoplasmic vesicle;cytoplasmic vesicle part;early endosome;endocytic vesicle;endosomal part;endosome;endosome membrane;extracellular membrane-bounded organelle;extracellular organelle…	Mineral absorption	3D-structure;Completeproteome;Directproteinsequencing;Diseasemutation;Disulfidebond;Glycoprotein;Iontransport;Iron;Irontransport;Metal-binding;Methylation;Polymorphism;Referenceproteome;Repeat;Secreted;Signal;Transport	GO:0000041;GO:0001775;GO:0001894;GO:0001895;GO:0002576;GO:0006810;GO:0006811;GO:0006812;GO:0006826;GO:0006873;GO:0006875;GO:0006879;GO:0006887;GO:0007596;GO:0007599;GO:0009987;GO:0015031;GO:0015682;GO:0016192;GO:0019725;GO:0030001;GO:0030003;GO:0030168;GO:0032501;GO:0032940;GO:0033572;GO:0042592;GO:0045184;GO:0046903;GO:0048878;GO:0050801;GO:0050817;GO:0050878;GO:0051234;GO:0051649;GO:0055065;GO:…	GO:0005215;GO:0005381;GO:0005488;GO:0005506;GO:0008199;GO:0008324;GO:0015075;GO:0015091;GO:0022857;GO:0022890;GO:0022891;GO:0022892;GO:0043167;GO:0043169;GO:0046872;GO:0046873;GO:0046914;GO:0046915;GO:0072510	GO:0005576;GO:0005615;GO:0005768;GO:0005769;GO:0005770;GO:0005905;GO:0009925;GO:0009986;GO:0010008;GO:0016020;GO:0016023;GO:0016324;GO:0030139;GO:0031090;GO:0031410;GO:0031974;GO:0031982;GO:0031983;GO:0031988;GO:0034774;GO:0043226;GO:0043227;GO:0043229;GO:0043230;GO:0043231;GO:0043233;GO:0044421;GO:0044422;GO:0044424;GO:0044425;GO:0044433;GO:0044440;GO:0044444;GO:0044446;GO:0044459;GO:0044464;GO:…	32	32	32	467	467	467	77063	0	32331	17328000000	40	372	330849	3.50407e+06
126530	126160	222670	299130	339900	291040	232490	1143500	840070	725310	1908600	902310	689310	4877200	3962100	4540300	2426700	998740	1081100	1569200	1208800	1424800	1258800	802650	1320400				biological regulation;cation homeostasis;cellular cation homeostasis;cellular chemical homeostasis;cellular component organization;cellular component organization or biogenesis;cellular homeostasis;cellular ion homeostasis;cellular iron ion homeostasis;cellular membrane organization;cellular metabolic process;cellular metal ion homeostasis;cellular process;chemical homeostasis;cofactor metabolic …	binding;cation binding;cofactor transporter activity;heme transporter activity;ion binding;metal ion binding;transporter activity	blood microparticle;cell part;cytoplasmic membrane-bounded vesicle lumen;cytoplasmic part;cytoplasmic vesicle part;endocytic vesicle lumen;extracellular membrane-bounded organelle;extracellular organelle;extracellular region;extracellular region part;extracellular space;extracellular vesicular exosome;intracellular organelle part;intracellular part;membrane-bounded organelle;membrane-bounded vesi…		Completeproteome;Directproteinsequencing;Disulfidebond;Glycoprotein;Heme;Host-virusinteraction;Iron;Metal-binding;Polymorphism;Proteomicsidentification;Referenceproteome;Repeat;Secreted;Signal;Transport	GO:0001932;GO:0001934;GO:0001959;GO:0001961;GO:0002637;GO:0002639;GO:0002682;GO:0002684;GO:0002697;GO:0002699;GO:0002700;GO:0002702;GO:0002703;GO:0002705;GO:0002706;GO:0002708;GO:0002712;GO:0002714;GO:0002819;GO:0002821;GO:0002822;GO:0002824;GO:0002889;GO:0002891;GO:0002920;GO:0002922;GO:0002923;GO:0002925;GO:0006778;GO:0006807;GO:0006810;GO:0006873;GO:0006875;GO:0006879;GO:0006897;GO:0006898;GO:…	GO:0005215;GO:0005488;GO:0015232;GO:0043167;GO:0043169;GO:0046872;GO:0051184	GO:0005576;GO:0005615;GO:0031974;GO:0031982;GO:0031983;GO:0031988;GO:0043226;GO:0043227;GO:0043230;GO:0043233;GO:0044421;GO:0044422;GO:0044424;GO:0044433;GO:0044444;GO:0044446;GO:0044464;GO:0060205;GO:0065010;GO:0070062;GO:0071682;GO:0072562	8	8	8	223	223	223	51676	0	63724	1934400000	22	76	83686.1	1.01502e+06
30232	0	0	156740	218910	232110	134740	183510	176600	131230	0	0	0	204150	295460	265210	108580	34276	100560	535930	412060	295470	0	49354	43291				biological regulation;blood coagulation;blood coagulation, intrinsic pathway;coagulation;hemostasis;macromolecule metabolic process;metabolic process;multicellular organismal process;negative regulation of biological process;negative regulation of blood coagulation;negative regulation of coagulation;negative regulation of multicellular organismal process;plasminogen activation;positive regulation…	aminopeptidase activity;binding;carbohydrate binding;catalytic activity;endopeptidase activity;exopeptidase activity;glycosaminoglycan binding;heparin binding;hydrolase activity;pattern binding;peptidase activity;peptidase activity, acting on L-amino acid peptides;polysaccharide binding;serine hydrolase activity;serine-type aminopeptidase activity;serine-type endopeptidase activity;serine-type ex…	cell part;extracellular membrane-bounded organelle;extracellular organelle;extracellular region;extracellular region part;extracellular space;extracellular vesicular exosome;membrane;membrane-bounded organelle;membrane-bounded vesicle;organelle;plasma membrane;vesicle	Complement and coagulation cascades	3D-structure;Alternativesplicing;Bloodcoagulation;Completeproteome;Directproteinsequencing;Diseasemutation;Disulfidebond;Glycoprotein;Hemostasis;Heparin-binding;Hydrolase;Polymorphism;Protease;Proteomicsidentification;Referenceproteome;Repeat;Secreted;Serineprotease;Signal	GO:0006508;GO:0007596;GO:0007597;GO:0007599;GO:0008152;GO:0016485;GO:0019538;GO:0030193;GO:0030195;GO:0031638;GO:0031639;GO:0032101;GO:0032501;GO:0043170;GO:0044238;GO:0048518;GO:0048519;GO:0048583;GO:0050789;GO:0050817;GO:0050818;GO:0050819;GO:0050878;GO:0050896;GO:0051239;GO:0051241;GO:0051604;GO:0051917;GO:0051919;GO:0061041;GO:0065007;GO:0065008;GO:0072376;GO:0080134	GO:0001871;GO:0003824;GO:0004175;GO:0004177;GO:0004252;GO:0005488;GO:0005539;GO:0008201;GO:0008233;GO:0008236;GO:0008238;GO:0016787;GO:0017171;GO:0030246;GO:0030247;GO:0070008;GO:0070009;GO:0070011	GO:0005576;GO:0005615;GO:0005886;GO:0016020;GO:0031982;GO:0031988;GO:0043226;GO:0043227;GO:0043230;GO:0044421;GO:0044464;GO:0065010;GO:0070062	6	6	6	98	98	98	70108	0	39641	265310000	41	15	100109	257138
30520000	33580000	35432000	34192000	33169000	47073000	32205000	132690000	128800000	153990000	80620000	78188000	131470000	27118000	20882000	22055000	45225000	35048000	32540000	39213000	36308000	35478000	40554000	49242000	53775000				activation of immune response;biological regulation;complement activation;complement activation, classical pathway;defense response;humoral immune response;immune effector process;immune response;immune system process;innate immune response;macromolecule metabolic process;metabolic process;negative regulation of biological process;negative regulation of complement activation;negative regulation o…		blood microparticle;cell part;extracellular region;extracellular region part;extracellular space;membrane;other organism cell;other organism part;plasma membrane	Complement and coagulation cascades	3D-structure;Complementpathway;Completeproteome;Directproteinsequencing;Disulfidebond;Glycoprotein;Immunity;Innateimmunity;Polymorphism;Referenceproteome;Repeat;Secreted;Signal;Sushi	GO:0002252;GO:0002253;GO:0002376;GO:0002673;GO:0002682;GO:0002683;GO:0002684;GO:0002697;GO:0002698;GO:0002703;GO:0002706;GO:0002712;GO:0002819;GO:0002822;GO:0002889;GO:0002920;GO:0002921;GO:0002923;GO:0006950;GO:0006952;GO:0006955;GO:0006956;GO:0006958;GO:0006959;GO:0008152;GO:0009892;GO:0009893;GO:0009894;GO:0009896;GO:0010468;GO:0010604;GO:0010605;GO:0010955;GO:0019222;GO:0019538;GO:0030449;GO:…		GO:0005576;GO:0005615;GO:0005886;GO:0016020;GO:0044216;GO:0044217;GO:0044421;GO:0044464;GO:0072562	25	25	25	561	561	561	67033	0	29558	69998000000	30	450	5.47193e+06	1.11989e+07
765400	781530	677010	325470	0	108180	527610	653430	1271600	645540	575910	332060	723260	964180	1057500	1386300	574810	641740	817500	510200	414990	674610	492610	352660	373970				biological adhesion;biological regulation;cell adhesion;cell adhesion mediated by integrin;cell differentiation;cell-matrix adhesion;cell-substrate adhesion;cellular component organization;cellular component organization at cellular level;cellular component organization or biogenesis;cellular component organization or biogenesis at cellular level;cellular developmental process;cellular process;de…	binding;carbohydrate binding;cargo receptor activity;extracellular matrix binding;glycosaminoglycan binding;heparin binding;integrin binding;pattern binding;polysaccharide binding;protein binding;protein complex binding;receptor activity;receptor binding;scavenger receptor activity	alphav-beta3 integrin-vitronectin complex;blood microparticle;cell part;extracellular matrix;extracellular membrane-bounded organelle;extracellular organelle;extracellular region;extracellular region part;extracellular space;extracellular vesicular exosome;macromolecular complex;membrane part;membrane-bounded organelle;membrane-bounded vesicle;organelle;plasma membrane part;protein complex;protei…	ECM-receptor interaction;Focal adhesion	3D-structure;Celladhesion;Completeproteome;Directproteinsequencing;Disulfidebond;Glycoprotein;Heparin-binding;Phosphoprotein;Polymorphism;Referenceproteome;Repeat;Secreted;Signal;Sulfation	GO:0001932;GO:0001934;GO:0002376;GO:0002673;GO:0002682;GO:0002697;GO:0002920;GO:0006950;GO:0006952;GO:0006955;GO:0007155;GO:0007160;GO:0009893;GO:0009966;GO:0009967;GO:0009987;GO:0010466;GO:0010468;GO:0010562;GO:0010604;GO:0010646;GO:0010647;GO:0010810;GO:0010811;GO:0010951;GO:0014910;GO:0014911;GO:0016043;GO:0019220;GO:0019222;GO:0022610;GO:0023051;GO:0023056;GO:0030100;GO:0030154;GO:0030155;GO:…	GO:0001871;GO:0004872;GO:0005044;GO:0005102;GO:0005178;GO:0005488;GO:0005515;GO:0005539;GO:0008201;GO:0030246;GO:0030247;GO:0032403;GO:0038024;GO:0050840	GO:0005576;GO:0005578;GO:0005615;GO:0031012;GO:0031982;GO:0031988;GO:0032991;GO:0043226;GO:0043227;GO:0043230;GO:0043234;GO:0044421;GO:0044425;GO:0044459;GO:0044464;GO:0065010;GO:0070062;GO:0071062;GO:0072562	6	6	6	165	165	165	54305	0	477	890560000	19	53	316654	393139
51281000	46004000	48067000	46962000	42938000	53335000	51977000	62049000	67751000	61533000	71271000	63212000	58574000	70596000	67713000	65601000	76709000	78572000	76782000	72369000	66426000	69936000	81415000	78155000	84969000				acylglycerol catabolic process;acylglycerol metabolic process;alcohol metabolic process;anatomical structure development;anatomical structure morphogenesis;artery morphogenesis;biological regulation;biosynthetic process;blood coagulation;blood vessel morphogenesis;catabolic process;cell migration;cell motility;cellular biosynthetic process;cellular catabolic process;cellular component assembly;ce…	binding;carbohydrate binding;cholesterol transporter activity;enzyme binding;glycosaminoglycan binding;heparin binding;lipase binding;lipid binding;lipid transporter activity;lipoprotein particle receptor binding;low-density lipoprotein particle receptor binding;pattern binding;phospholipid binding;polysaccharide binding;protein binding;receptor binding;sterol transporter activity;substrate-speci…	actin cytoskeleton;cell body;cell part;chylomicron;chylomicron remnant;clathrin coated vesicle membrane;clathrin-coated endocytic vesicle membrane;coated vesicle membrane;cytoplasm;cytoplasmic membrane-bounded vesicle lumen;cytoplasmic part;cytoplasmic vesicle membrane;cytoplasmic vesicle part;cytoskeleton;cytosol;early endosome;endocytic vesicle lumen;endocytic vesicle membrane;endoplasmic retic…	Fat digestion and absorption;Vitamin digestion and absorption	Acetylation;Atherosclerosis;Cholesterolmetabolism;Chylomicron;Completeproteome;Cytoplasm;Directproteinsequencing;Diseasemutation;Disulfidebond;Glycoprotein;Heparin-binding;LDL;Lipidmetabolism;Lipidtransport;Lipoprotein;Palmitate;Phosphoprotein;Polymorphism;Referenceproteome;RNAediting;Secreted;Signal;Steroidmetabolism;Sterolmetabolism;Transport;VLDL	GO:0001523;GO:0001701;GO:0002237;GO:0002376;GO:0006066;GO:0006629;GO:0006638;GO:0006639;GO:0006641;GO:0006642;GO:0006662;GO:0006720;GO:0006721;GO:0006810;GO:0006869;GO:0006897;GO:0006898;GO:0006928;GO:0007165;GO:0007276;GO:0007283;GO:0007399;GO:0007596;GO:0007599;GO:0007602;GO:0007603;GO:0008152;GO:0008202;GO:0008203;GO:0009056;GO:0009057;GO:0009058;GO:0009059;GO:0009314;GO:0009416;GO:0009566;GO:…	GO:0001871;GO:0005102;GO:0005215;GO:0005319;GO:0005488;GO:0005515;GO:0005539;GO:0005543;GO:0008201;GO:0008289;GO:0015248;GO:0017127;GO:0019899;GO:0022892;GO:0030246;GO:0030247;GO:0035473;GO:0050750;GO:0070325	GO:0005576;GO:0005615;GO:0005737;GO:0005768;GO:0005769;GO:0005788;GO:0005789;GO:0005794;GO:0005829;GO:0005856;GO:0005886;GO:0010008;GO:0012506;GO:0015629;GO:0016020;GO:0030659;GO:0030662;GO:0030665;GO:0030666;GO:0030669;GO:0031090;GO:0031904;GO:0031974;GO:0031982;GO:0031983;GO:0031988;GO:0032991;GO:0032994;GO:0034358;GO:0034359;GO:0034360;GO:0034361;GO:0034362;GO:0034363;GO:0034385;GO:0042627;GO:…	240	240	240	551	551	551	5156	0	32331	7826800000000000	250	5406	3.71389e+06	8.80257e+06
1799400	2081800	2004000	715350	1720400	2688900	991430	1500600	304560	1210400	1820400	1007900	1170900	2524900	3208900	740680	104350	1077700	271790	1254000	701670	740350	747970	796030	207080				anatomical structure formation involved in morphogenesis;angiogenesis;biological regulation;blood coagulation;cell activation;cellular process;cellular response to chemical stimulus;cellular response to inorganic substance;cellular response to iron ion;cellular response to metal ion;cellular response to stimulus;chemotaxis;coagulation;cofactor transport;defense response;defense response to fungus…	binding;carbohydrate binding;cation binding;cysteine-type endopeptidase inhibitor activity;endopeptidase inhibitor activity;endopeptidase regulator activity;enzyme inhibitor activity;enzyme regulator activity;glycoprotein binding;glycosaminoglycan binding;heme binding;heparan sulfate proteoglycan binding;heparin binding;immunoglobulin binding;ion binding;iron ion binding;metal ion binding;pattern…	blood microparticle;cell part;cytoplasmic membrane-bounded vesicle lumen;cytoplasmic part;cytoplasmic vesicle part;extracellular membrane-bounded organelle;extracellular organelle;extracellular region;extracellular region part;extracellular vesicular exosome;intracellular organelle part;intracellular part;membrane;membrane-bounded organelle;membrane-bounded vesicle;membrane-enclosed lumen;organel…		Angiogenesis;Bloodcoagulation;Chemotaxis;Cleavageonpairofbasicresidues;Completeproteome;Copper;Directproteinsequencing;Diseasemutation;Disulfidebond;Fibrinolysis;Glycoprotein;Hemostasis;Heparin-binding;Metal-binding;Polymorphism;Referenceproteome;Repeat;Secreted;Signal;Thrombophilia;Zinc	GO:0001525;GO:0001558;GO:0001775;GO:0001932;GO:0001952;GO:0001954;GO:0002576;GO:0002682;GO:0002684;GO:0002831;GO:0002833;GO:0002834;GO:0002836;GO:0002837;GO:0002839;GO:0006355;GO:0006357;GO:0006810;GO:0006887;GO:0006935;GO:0006950;GO:0006952;GO:0007162;GO:0007596;GO:0007599;GO:0008285;GO:0009605;GO:0009607;GO:0009620;GO:0009889;GO:0009987;GO:0010033;GO:0010035;GO:0010038;GO:0010039;GO:0010468;GO:…	GO:0001871;GO:0001948;GO:0004857;GO:0004866;GO:0004867;GO:0004869;GO:0005102;GO:0005488;GO:0005506;GO:0005515;GO:0005539;GO:0008201;GO:0008270;GO:0019865;GO:0020037;GO:0030234;GO:0030246;GO:0030247;GO:0030414;GO:0032403;GO:0043167;GO:0043169;GO:0043394;GO:0043395;GO:0046872;GO:0046906;GO:0046914;GO:0061134;GO:0061135	GO:0005576;GO:0005886;GO:0016020;GO:0031093;GO:0031974;GO:0031982;GO:0031983;GO:0031988;GO:0034774;GO:0043226;GO:0043227;GO:0043230;GO:0043233;GO:0044421;GO:0044422;GO:0044424;GO:0044433;GO:0044444;GO:0044446;GO:0044464;GO:0060205;GO:0065010;GO:0070062;GO:0072562	5	5	5	103	103	103	59578	0	12547	1274400000	22	44	670392	693076
14784000	10766000	13363000	2543100	4012600	4309100	2914200	6337800	6441300	6179000	2011700	1800400	1207700	2980000	3102200	3567800	746580	6413400	5117200	4177200	3689300	3191800	5295000	5028300	5509100				activation of immune response;biological regulation;cellular component organization;cellular component organization or biogenesis;cellular membrane organization;cellular process;complement activation;complement activation, classical pathway;defense response;endocytosis;establishment of localization;humoral immune response;immune effector process;immune response;immune system process;innate immune…	antigen binding;binding	cell part;extracellular region;membrane;plasma membrane		Completeproteome;Disulfidebond;Immunoglobulindomain;ImmunoglobulinVregion;Proteomicsidentification;Referenceproteome;Signal	GO:0002252;GO:0002253;GO:0002376;GO:0002682;GO:0002684;GO:0006810;GO:0006897;GO:0006898;GO:0006950;GO:0006952;GO:0006955;GO:0006956;GO:0006958;GO:0006959;GO:0008152;GO:0009987;GO:0010324;GO:0016043;GO:0016044;GO:0016192;GO:0019538;GO:0043170;GO:0044238;GO:0045087;GO:0048518;GO:0048583;GO:0048584;GO:0050776;GO:0050778;GO:0050789;GO:0050896;GO:0051234;GO:0061024;GO:0065007;GO:0071840;GO:0072376	GO:0003823;GO:0005488	GO:0005576;GO:0005886;GO:0016020;GO:0044464	3	3	3	214	214	214	12451	0	17601	761180000	4	22	5.2605e+06	3.18751e+06
79780000	74822000	65149000	55509000	51453000	48741000	62156000	45465000	47280000	46480000	34646000	41180000	32287000	54192000	48688000	51547000	30830000	36015000	35029000	42651000	39909000	41208000	43869000	42619000	42369000				anatomical structure development;biological adhesion;biological regulation;blood coagulation;blood coagulation, intrinsic pathway;cell activation;cell adhesion;cell-substrate adhesion;cellular component assembly;cellular component organization;cellular component organization at cellular level;cellular component organization or biogenesis;cellular component organization or biogenesis at cellular l…	binding;chaperone binding;collagen binding;enzyme binding;glycoprotein binding;identical protein binding;immunoglobulin binding;integrin binding;protease binding;protein binding;protein complex binding;protein dimerization activity;protein homodimerization activity;protein N-terminus binding;receptor binding	cell part;clathrin-coated vesicle;coated vesicle;cytoplasmic membrane-bounded vesicle;cytoplasmic membrane-bounded vesicle lumen;cytoplasmic part;cytoplasmic vesicle;cytoplasmic vesicle part;endoplasmic reticulum;external side of plasma membrane;extracellular matrix;extracellular membrane-bounded organelle;extracellular organelle;extracellular region;extracellular region part;extracellular vesicu…	Complement and coagulation cascades;ECM-receptor interaction;Focal adhesion	3D-structure;Alternativesplicing;Bloodcoagulation;Celladhesion;Cleavageonpairofbasicresidues;Completeproteome;Directproteinsequencing;Diseasemutation;Disulfidebond;Extracellularmatrix;Glycoprotein;Hemostasis;Isopeptidebond;Polymorphism;Referenceproteome;Repeat;Secreted;Signal;Ublconjugation;vonWillebranddisease	GO:0001775;GO:0001889;GO:0001890;GO:0002576;GO:0006461;GO:0006810;GO:0006887;GO:0006950;GO:0007155;GO:0007596;GO:0007597;GO:0007599;GO:0008152;GO:0009611;GO:0009987;GO:0016043;GO:0016192;GO:0019538;GO:0022607;GO:0022610;GO:0030168;GO:0030198;GO:0031589;GO:0032501;GO:0032502;GO:0032940;GO:0043062;GO:0043170;GO:0043933;GO:0044238;GO:0046903;GO:0048513;GO:0048856;GO:0050817;GO:0050878;GO:0050896;GO:…	GO:0001948;GO:0002020;GO:0005102;GO:0005178;GO:0005488;GO:0005515;GO:0005518;GO:0019865;GO:0019899;GO:0032403;GO:0042802;GO:0042803;GO:0046983;GO:0047485;GO:0051087	GO:0005576;GO:0005578;GO:0005783;GO:0009897;GO:0016023;GO:0030135;GO:0030136;GO:0030141;GO:0031012;GO:0031091;GO:0031093;GO:0031410;GO:0031974;GO:0031982;GO:0031983;GO:0031988;GO:0033093;GO:0034774;GO:0043226;GO:0043227;GO:0043229;GO:0043230;GO:0043231;GO:0043233;GO:0044421;GO:0044422;GO:0044424;GO:0044425;GO:0044433;GO:0044444;GO:0044446;GO:0044459;GO:0044464;GO:0060205;GO:0065010;GO:0070062	100	100	100	426	426	426	30926	0	32331	3811300000000000	132	3174	1.16746e+07	8.65409e+06
120560	132310	0	0	0	0	0	0	0	56860	0	0	0	146370	0	87091	0	0	0	217320	250120	198300	223020	0	0				cell cycle;cell cycle process;cellular component assembly;cellular component assembly at cellular level;cellular component organization;cellular component organization at cellular level;cellular component organization or biogenesis;cellular component organization or biogenesis at cellular level;cellular macromolecular complex assembly;cellular macromolecular complex subunit organization;cellular …	binding;catalytic activity;GTP binding;GTPase activity;guanyl nucleotide binding;guanyl ribonucleotide binding;hydrolase activity;hydrolase activity, acting on acid anhydrides;hydrolase activity, acting on acid anhydrides, in phosphorus-containing anhydrides;nucleoside-triphosphatase activity;nucleotide binding;purine nucleotide binding;purine ribonucleoside triphosphate binding;purine ribonucleo…	axon part;cell body;cell part;cell projection;cell projection part;cilium;cytoplasmic part;cytoskeletal part;cytosol;extracellular membrane-bounded organelle;extracellular organelle;extracellular region part;extracellular vesicular exosome;internode region of axon;intracellular membrane-bounded organelle;intracellular organelle;intracellular organelle part;intracellular part;macromolecular comple…	Gap junction;Pathogenic Escherichia coli infection;Phagosome	Completeproteome;Cytoplasm;Cytoskeleton;Directproteinsequencing;Diseasemutation;Dystonia;GTP-binding;Leukodystrophy;Microtubule;Nucleotide-binding;Phosphoprotein;Polymorphism;Referenceproteome	GO:0000086;GO:0000278;GO:0006457;GO:0006458;GO:0006461;GO:0006996;GO:0007017;GO:0007049;GO:0008152;GO:0009987;GO:0016043;GO:0019538;GO:0022402;GO:0022607;GO:0034621;GO:0034622;GO:0043170;GO:0043623;GO:0043933;GO:0044237;GO:0044238;GO:0044260;GO:0044267;GO:0051084;GO:0051258;GO:0065003;GO:0071822;GO:0071840;GO:0071841;GO:0071842;GO:0071844	GO:0000166;GO:0003824;GO:0003924;GO:0005198;GO:0005200;GO:0005488;GO:0005525;GO:0016462;GO:0016787;GO:0016817;GO:0016818;GO:0017076;GO:0017111;GO:0019001;GO:0032553;GO:0032555;GO:0032561;GO:0035639	GO:0005634;GO:0005829;GO:0005874;GO:0005929;GO:0031982;GO:0031988;GO:0032991;GO:0033267;GO:0033269;GO:0042995;GO:0043025;GO:0043209;GO:0043226;GO:0043227;GO:0043229;GO:0043230;GO:0043231;GO:0043234;GO:0044297;GO:0044421;GO:0044422;GO:0044424;GO:0044430;GO:0044444;GO:0044446;GO:0044463;GO:0044464;GO:0065010;GO:0070062	14	2	2	444	63	63	49585	0	15171	80306000	19	7	61787.1	282532
929690	1025100	825860	441610	468490	122220	888260	138450	236600	265040	213290	280710	222240	441190	347180	273290	28598	301730	145620	222300	267480	149000	255730	64324	224440				alcohol biosynthetic process;alcohol metabolic process;apoptosis;biological regulation;biosynthetic process;carbohydrate biosynthetic process;carbohydrate metabolic process;cell death;cellular biosynthetic process;cellular carbohydrate biosynthetic process;cellular carbohydrate metabolic process;cellular component organization;cellular component organization at cellular level;cellular component o…	binding;catalytic activity;coenzyme binding;cofactor binding;cytoskeletal protein binding;glyceraldehyde-3-phosphate dehydrogenase (NAD+) (phosphorylating) activity;identical protein binding;microtubule binding;NAD binding;NADP binding;nucleotide binding;oxidoreductase activity;oxidoreductase activity, acting on the aldehyde or oxo group of donors;oxidoreductase activity, acting on the aldehyde o…	cell part;cytoplasm;cytoplasmic part;cytoskeleton;cytosol;extracellular membrane-bounded organelle;extracellular organelle;extracellular region part;extracellular vesicular exosome;intracellular membrane-bounded organelle;intracellular non-membrane-bounded organelle;intracellular organelle;intracellular organelle part;intracellular part;lipid particle;macromolecular complex;membrane;membrane-boun…	Alzheimer's disease;Glycolysis / Gluconeogenesis	3D-structure;Acetylation;ADP-ribosylation;Alternativesplicing;Apoptosis;Completeproteome;Cytoplasm;Cytoskeleton;Directproteinsequencing;Glycolysis;Membrane;Methylation;NAD;Nucleus;Oxidoreductase;Phosphoprotein;Polymorphism;Proteomicsidentification;Referenceproteome;S-nitrosylation;Transferase;Translationregulation;Ublconjugation	GO:0000226;GO:0005975;GO:0005996;GO:0006006;GO:0006066;GO:0006094;GO:0006417;GO:0006464;GO:0006915;GO:0006996;GO:0007010;GO:0007017;GO:0008152;GO:0008219;GO:0009058;GO:0009889;GO:0009890;GO:0009892;GO:0009987;GO:0010033;GO:0010468;GO:0010556;GO:0010558;GO:0010605;GO:0010608;GO:0012501;GO:0016043;GO:0016051;GO:0016265;GO:0017014;GO:0017148;GO:0018119;GO:0018193;GO:0018198;GO:0019222;GO:0019318;GO:…	GO:0000166;GO:0003824;GO:0004365;GO:0005488;GO:0005515;GO:0008017;GO:0008092;GO:0015631;GO:0016491;GO:0016620;GO:0016740;GO:0016769;GO:0016903;GO:0035605;GO:0042802;GO:0048037;GO:0050661;GO:0050662;GO:0051287	GO:0005634;GO:0005737;GO:0005811;GO:0005829;GO:0005856;GO:0005886;GO:0015630;GO:0016020;GO:0030529;GO:0031090;GO:0031965;GO:0031982;GO:0031988;GO:0032991;GO:0043226;GO:0043227;GO:0043228;GO:0043229;GO:0043230;GO:0043231;GO:0043232;GO:0044421;GO:0044422;GO:0044424;GO:0044428;GO:0044444;GO:0044446;GO:0044464;GO:0048471;GO:0065010;GO:0070062	6	6	6	245	245	245	36053	0	11403	1083100000	17	15	331229	725796
832530	797570	652230	0	0	157440	0	0	0	0	0	0	0	457850	287020	311110	0	0	0	234270	422020	286360	0	0	0				biological adhesion;biological regulation;blood coagulation;calcium ion homeostasis;calcium-mediated signaling;cardiac muscle contraction;cation homeostasis;cation transport;cell adhesion;cell migration;cell motility;cellular calcium ion homeostasis;cellular cation homeostasis;cellular chemical homeostasis;cellular component movement;cellular component organization;cellular component organization…	active transmembrane transporter activity;antigen binding;ATPase activator activity;ATPase activity;ATPase activity, coupled;ATPase activity, coupled to movement of substances;ATPase activity, coupled to transmembrane movement of ions;ATPase activity, coupled to transmembrane movement of ions, phosphorylative mechanism;ATPase activity, coupled to transmembrane movement of substances;ATPase bindin…	apical plasma membrane;basolateral plasma membrane;caveola;cell junction;cell part;cell-cell contact zone;cell-cell junction;extracellular membrane-bounded organelle;extracellular organelle;extracellular region part;extracellular vesicular exosome;intercalated disc;macromolecular complex;membrane;membrane part;membrane raft;membrane-bounded organelle;membrane-bounded vesicle;organelle;plasma memb…	Aldosterone-regulated sodium reabsorption;Bile secretion;Carbohydrate digestion and absorption;Cardiac muscle contraction;Endocrine and other factor-regulated calcium reabsorption;Gastric acid secretion;Mineral absorption;Pancreatic secretion;Protein digestion and absorption;Proximal tubule bicarbonate reclamation;Salivary secretion	Alternativesplicing;Celladhesion;Cellmembrane;Completeproteome;Disulfidebond;Glycoprotein;Iontransport;Membrane;Phosphoprotein;Potassium;Potassiumtransport;Referenceproteome;Signal-anchor;Sodium;Sodium/potassiumtransport;Sodiumtransport;Transmembrane;Transmembranehelix;Transport	GO:0001666;GO:0002230;GO:0002376;GO:0002682;GO:0002697;GO:0002831;GO:0003008;GO:0003012;GO:0006140;GO:0006810;GO:0006811;GO:0006812;GO:0006813;GO:0006873;GO:0006874;GO:0006875;GO:0006883;GO:0006928;GO:0006936;GO:0006937;GO:0006941;GO:0006942;GO:0006950;GO:0007009;GO:0007155;GO:0007165;GO:0007596;GO:0007599;GO:0008016;GO:0008104;GO:0009894;GO:0009987;GO:0010107;GO:0010468;GO:0010608;GO:0010882;GO:…	GO:0001671;GO:0003823;GO:0003824;GO:0005215;GO:0005391;GO:0005488;GO:0005515;GO:0008047;GO:0008324;GO:0008556;GO:0015075;GO:0015077;GO:0015079;GO:0015081;GO:0015399;GO:0015405;GO:0015662;GO:0016462;GO:0016787;GO:0016817;GO:0016818;GO:0016820;GO:0016887;GO:0017111;GO:0019899;GO:0022804;GO:0022857;GO:0022890;GO:0022891;GO:0022892;GO:0023023;GO:0023026;GO:0030234;GO:0042623;GO:0042625;GO:0042626;GO:…	GO:0005886;GO:0005890;GO:0005901;GO:0005911;GO:0014704;GO:0016020;GO:0016323;GO:0016324;GO:0030054;GO:0031982;GO:0031988;GO:0032991;GO:0042383;GO:0043226;GO:0043227;GO:0043230;GO:0043234;GO:0044291;GO:0044421;GO:0044425;GO:0044459;GO:0044464;GO:0045121;GO:0065010;GO:0070062	3	3	3	125	125	125	35061	0	20736	201950000	15	10	393502	824247
78198	25873	0	114960	156690	119110	128980	90474	118790	119670	698210	789780	463650	401540	335920	437300	637780	695020	486910	68291	72620	80459	135660	126670	150450				biological regulation;blood coagulation;chemotaxis;coagulation;hemostasis;locomotion;multicellular organismal process;negative regulation of catalytic activity;negative regulation of endopeptidase activity;negative regulation of hydrolase activity;negative regulation of molecular function;negative regulation of peptidase activity;regulation of biological process;regulation of biological quality;r…	binding;carbohydrate binding;endopeptidase inhibitor activity;endopeptidase regulator activity;enzyme inhibitor activity;enzyme regulator activity;glycosaminoglycan binding;heparin binding;pattern binding;peptidase inhibitor activity;peptidase regulator activity;polysaccharide binding;serine-type endopeptidase inhibitor activity	extracellular membrane-bounded organelle;extracellular organelle;extracellular region;extracellular region part;extracellular space;extracellular vesicular exosome;membrane-bounded organelle;membrane-bounded vesicle;organelle;vesicle	Complement and coagulation cascades	3D-structure;Bloodcoagulation;Chemotaxis;Completeproteome;Directproteinsequencing;Diseasemutation;Glycoprotein;Hemostasis;Heparin-binding;Phosphoprotein;Polymorphism;Proteaseinhibitor;Referenceproteome;Repeat;Serineproteaseinhibitor;Signal;Sulfation;Thrombophilia	GO:0006935;GO:0007596;GO:0007599;GO:0009605;GO:0010466;GO:0010951;GO:0019222;GO:0032501;GO:0040011;GO:0042221;GO:0042330;GO:0043086;GO:0044092;GO:0050789;GO:0050790;GO:0050817;GO:0050878;GO:0050896;GO:0051336;GO:0051346;GO:0052547;GO:0052548;GO:0065007;GO:0065008;GO:0065009	GO:0001871;GO:0004857;GO:0004866;GO:0004867;GO:0005488;GO:0005539;GO:0008201;GO:0030234;GO:0030246;GO:0030247;GO:0030414;GO:0061134;GO:0061135	GO:0005576;GO:0005615;GO:0031982;GO:0031988;GO:0043226;GO:0043227;GO:0043230;GO:0044421;GO:0065010;GO:0070062	3	3	3	54	54	54	5707	0	20321	257650000	26	16	57421.7	57576.3
28817000	6805600	16071000	5584700	209300	0	0	0	0	0	0	0	9601100	16586000	13876000	12244000	0	0	0	14497000	8837600	12283000	17053000	15142000	15970000				activation of immune response;biological regulation;cellular component organization;cellular component organization or biogenesis;cellular membrane organization;cellular process;complement activation;complement activation, classical pathway;defense response;endocytosis;establishment of localization;humoral immune response;immune effector process;immune response;immune system process;innate immune…	antigen binding;binding	blood microparticle;cell part;extracellular region;extracellular region part;membrane;plasma membrane		Completeproteome;Disulfidebond;Immunoglobulindomain;ImmunoglobulinVregion;Referenceproteome;Signal	GO:0002252;GO:0002253;GO:0002376;GO:0002682;GO:0002684;GO:0006810;GO:0006897;GO:0006898;GO:0006950;GO:0006952;GO:0006955;GO:0006956;GO:0006958;GO:0006959;GO:0008152;GO:0009987;GO:0010324;GO:0016043;GO:0016044;GO:0016192;GO:0019538;GO:0043170;GO:0044238;GO:0045087;GO:0048518;GO:0048583;GO:0048584;GO:0050776;GO:0050778;GO:0050789;GO:0050896;GO:0051234;GO:0061024;GO:0065007;GO:0071840;GO:0072376	GO:0003823;GO:0005488	GO:0005576;GO:0005886;GO:0016020;GO:0044421;GO:0044464;GO:0072562	3	3	3	298	298	298	1338	0	20445	1621700000	4	22	1.07558e+07	6.85214e+06
100980	357440	290050	353810	80891	111820	92535	62793	27536	519590	64667	0	0	754870	288470	639060	91729	79837	119040	284110	224330	0	57248	0	0				anatomical structure formation involved in morphogenesis;angiogenesis;ATP biosynthetic process;ATP hydrolysis coupled proton transport;ATP metabolic process;ATP synthesis coupled proton transport;biological regulation;biosynthetic process;cation homeostasis;cation transport;cell differentiation;cellular biosynthetic process;cellular cation homeostasis;cellular chemical homeostasis;cellular compon…	active transmembrane transporter activity;adenyl nucleotide binding;adenyl ribonucleotide binding;ATP binding;ATPase activity;ATPase activity, coupled;ATPase activity, coupled to movement of substances;ATPase activity, coupled to transmembrane movement of ions;ATPase activity, coupled to transmembrane movement of substances;binding;catalytic activity;cation transmembrane transporter activity;cati…	cell part;cell surface;cytoplasmic part;extracellular membrane-bounded organelle;extracellular organelle;extracellular region part;extracellular vesicular exosome;intracellular membrane-bounded organelle;intracellular non-membrane-bounded organelle;intracellular organelle;intracellular organelle lumen;intracellular organelle part;intracellular part;macromolecular complex;membrane;membrane part;me…	Alzheimer's disease;Huntington's disease;Oxidative phosphorylation;Parkinson's disease	Acetylation;ATP-binding;ATPsynthesis;CF(1);Completeproteome;Directproteinsequencing;Glycoprotein;Hydrogeniontransport;Hydrolase;Iontransport;Membrane;Mitochondrion;Mitochondrioninnermembrane;Nucleotide-binding;Phosphoprotein;Polymorphism;Proteomicsidentification;Referenceproteome;Transitpeptide;Transport	GO:0001525;GO:0001649;GO:0006091;GO:0006139;GO:0006163;GO:0006164;GO:0006629;GO:0006753;GO:0006754;GO:0006807;GO:0006810;GO:0006811;GO:0006812;GO:0006818;GO:0006839;GO:0006873;GO:0006885;GO:0006933;GO:0006996;GO:0007005;GO:0007162;GO:0008152;GO:0009058;GO:0009117;GO:0009141;GO:0009142;GO:0009144;GO:0009145;GO:0009150;GO:0009152;GO:0009165;GO:0009199;GO:0009201;GO:0009205;GO:0009206;GO:0009259;GO:…	GO:0000166;GO:0003824;GO:0005102;GO:0005215;GO:0005488;GO:0005515;GO:0005524;GO:0008324;GO:0015075;GO:0015077;GO:0015078;GO:0015399;GO:0015405;GO:0016462;GO:0016787;GO:0016817;GO:0016818;GO:0016820;GO:0016887;GO:0017076;GO:0017111;GO:0019829;GO:0022804;GO:0022857;GO:0022890;GO:0022891;GO:0022892;GO:0030554;GO:0032553;GO:0032555;GO:0032559;GO:0035639;GO:0042287;GO:0042288;GO:0042623;GO:0042625;GO:…	GO:0005634;GO:0005739;GO:0005753;GO:0005754;GO:0005759;GO:0005886;GO:0009295;GO:0009986;GO:0016020;GO:0016469;GO:0031090;GO:0031966;GO:0031974;GO:0031982;GO:0031988;GO:0032991;GO:0033178;GO:0042645;GO:0043226;GO:0043227;GO:0043228;GO:0043229;GO:0043230;GO:0043231;GO:0043232;GO:0043233;GO:0043234;GO:0044421;GO:0044422;GO:0044424;GO:0044425;GO:0044429;GO:0044444;GO:0044446;GO:0044455;GO:0044464;GO:…	9	9	9	251	251	251	56559	0	10267	531150000	29	34	129001	901915
5514100	4248400	4167300	8185600	5052800	5284300	6916100	3198200	3559000	4453800	4900200	4287700	2670800	2185000	2438200	1434400	2505000	2757300	1857200	1966200	1865900	1898300	3247000	1397100	1980200				alcohol metabolic process;amine metabolic process;anatomical structure morphogenesis;biological adhesion;biological regulation;biosynthetic process;catabolic process;cell adhesion;cell part morphogenesis;cell projection morphogenesis;cell projection organization;cell-cell adhesion;cellular amine metabolic process;cellular biogenic amine metabolic process;cellular catabolic process;cellular compon…	alcohol binding;amine binding;antioxidant activity;binding;cation binding;cholesterol binding;cholesterol transporter activity;copper ion binding;enzyme activator activity;enzyme regulator activity;identical protein binding;ion binding;lipid binding;lipid transporter activity;metal ion binding;phosphatidylcholine binding;phosphatidylcholine-sterol O-acyltransferase activator activity;phospholipid…	blood microparticle;cell part;chylomicron;cytoplasmic part;cytosol;early endosome;endoplasmic reticulum lumen;endoplasmic reticulum part;endosome;extracellular membrane-bounded organelle;extracellular organelle;extracellular region;extracellular region part;extracellular space;extracellular vesicular exosome;high-density lipoprotein particle;intracellular membrane-bounded organelle;intracellular …		3D-structure;Chylomicron;Completeproteome;HDL;Lipidtransport;Phosphoprotein;Polymorphism;Referenceproteome;Repeat;Secreted;Signal;Transport	GO:0000302;GO:0000303;GO:0000305;GO:0001523;GO:0002227;GO:0002251;GO:0002376;GO:0002385;GO:0006066;GO:0006576;GO:0006629;GO:0006644;GO:0006650;GO:0006694;GO:0006695;GO:0006720;GO:0006721;GO:0006801;GO:0006807;GO:0006810;GO:0006869;GO:0006950;GO:0006952;GO:0006955;GO:0006979;GO:0006982;GO:0007155;GO:0007159;GO:0007165;GO:0007602;GO:0007603;GO:0008152;GO:0008202;GO:0008203;GO:0008610;GO:0009056;GO:…	GO:0005215;GO:0005319;GO:0005488;GO:0005496;GO:0005507;GO:0005515;GO:0005543;GO:0008047;GO:0008289;GO:0015248;GO:0015485;GO:0016209;GO:0017127;GO:0022892;GO:0030234;GO:0031210;GO:0032934;GO:0042802;GO:0042803;GO:0043167;GO:0043169;GO:0043176;GO:0043178;GO:0046872;GO:0046914;GO:0046983;GO:0050997;GO:0060228	GO:0005576;GO:0005615;GO:0005768;GO:0005769;GO:0005788;GO:0005829;GO:0031974;GO:0031982;GO:0031988;GO:0032991;GO:0032994;GO:0034358;GO:0034361;GO:0034364;GO:0034385;GO:0042627;GO:0043226;GO:0043227;GO:0043229;GO:0043230;GO:0043231;GO:0043233;GO:0044421;GO:0044422;GO:0044424;GO:0044432;GO:0044444;GO:0044446;GO:0044464;GO:0065010;GO:0070013;GO:0070062;GO:0072562	20	20	19	427	427	399	45371	0	1554	4639500000	25	166	1.45484e+06	1.35691e+06
138200	59057	130760	96494	0	107170	0	0	97280	108860	0	0	0	75494	0	135220	85833	133350	93631	68280	102520	104040	0	152470	183640				anatomical structure morphogenesis;anterograde axon cargo transport;axon cargo transport;axon regeneration;axon transport of mitochondrion;axonogenesis;biological regulation;cell communication;cell part morphogenesis;cell projection morphogenesis;cell projection organization;cell-cell signaling;cellular component assembly;cellular component assembly at cellular level;cellular component morphogene…	binding;binding, bridging;cytoskeletal protein binding;identical protein binding;microtubule binding;protein binding;protein binding, bridging;protein C-terminus binding;structural constituent of cytoskeleton;structural molecule activity;tubulin binding	axon;axon part;cell part;cell projection;cell projection part;cytoplasm;cytoplasmic part;cytoskeletal part;cytosol;growth cone;intermediate filament;intracellular organelle part;intracellular part;macromolecular complex;neurofilament;neuromuscular junction;neuron projection;organelle part;protein complex;site of polarized growth;synapse	Amyotrophic lateral sclerosis (ALS)	Acetylation;Alternativesplicing;Charcot-Marie-Toothdisease;Coiledcoil;Completeproteome;Directproteinsequencing;Diseasemutation;Glycoprotein;Intermediatefilament;Neurodegeneration;Neuropathy;Phosphoprotein;Polymorphism;Proteomicsidentification;Referenceproteome;Repeat;Ublconjugation	GO:0000226;GO:0003008;GO:0006461;GO:0006810;GO:0006928;GO:0006950;GO:0006996;GO:0007010;GO:0007017;GO:0007018;GO:0007154;GO:0007267;GO:0007268;GO:0007409;GO:0008088;GO:0008089;GO:0008090;GO:0009611;GO:0009636;GO:0009653;GO:0009719;GO:0009725;GO:0009987;GO:0010033;GO:0010720;GO:0010769;GO:0010941;GO:0010970;GO:0010975;GO:0014012;GO:0016043;GO:0019896;GO:0022603;GO:0022604;GO:0022607;GO:0023052;GO:…	GO:0005198;GO:0005200;GO:0005488;GO:0005515;GO:0008017;GO:0008022;GO:0008092;GO:0015631;GO:0030674;GO:0042802;GO:0060090	GO:0005737;GO:0005829;GO:0005882;GO:0005883;GO:0030424;GO:0030426;GO:0030427;GO:0031594;GO:0032991;GO:0033267;GO:0042995;GO:0043005;GO:0043234;GO:0044422;GO:0044424;GO:0044430;GO:0044444;GO:0044446;GO:0044463;GO:0044464;GO:0045202	4	3	2	63	46	31	61516	0	17557	133060000	35	5	57876.5	121073
460140	298660	445620	656030	1479300	1611700	1718900	686730	701640	424520	1145400	1117700	903200	435400	415910	508490	629260	520280	567770	268660	441800	519360	1033200	890880	913890				activation of MAPK activity;anatomical structure development;anatomical structure formation involved in morphogenesis;anatomical structure morphogenesis;angiogenesis;behavior;behavioral response to pain;biological adhesion;biological regulation;blood coagulation;carbohydrate metabolic process;cartilage development;cartilage development involved in endochondral bone morphogenesis;cell activation;c…	binding;calcium ion binding;carbohydrate binding;cation binding;collagen binding;collagen V binding;cytokine binding;extracellular matrix binding;fibrinogen binding;fibroblast growth factor binding;fibronectin binding;glycoprotein binding;glycosaminoglycan binding;growth factor binding;heparin binding;identical protein binding;integrin binding;ion binding;laminin binding;lipid binding;lipoprotein…	cell part;cell surface;cytoplasmic membrane-bounded vesicle;cytoplasmic membrane-bounded vesicle lumen;cytoplasmic part;cytoplasmic vesicle;cytoplasmic vesicle part;endoplasmic reticulum;endoplasmic reticulum lumen;endoplasmic reticulum part;external side of plasma membrane;extracellular matrix;extracellular membrane-bounded organelle;extracellular organelle;extracellular region;extracellular reg…	ECM-receptor interaction;Focal adhesion;Malaria;Phagosome;TGF-beta signaling pathway	3D-structure;Alternativesplicing;Calcium;Celladhesion;Completeproteome;Disulfidebond;EGF-likedomain;Endoplasmicreticulum;Glycoprotein;Heparin-binding;Polymorphism;Referenceproteome;Repeat;Sarcoplasmicreticulum;Signal;Unfoldedproteinresponse	GO:0000187;GO:0001525;GO:0001666;GO:0001775;GO:0001817;GO:0001818;GO:0001819;GO:0001932;GO:0001936;GO:0001937;GO:0001952;GO:0001953;GO:0002040;GO:0002376;GO:0002544;GO:0002576;GO:0002577;GO:0002578;GO:0002580;GO:0002581;GO:0002604;GO:0002605;GO:0002682;GO:0002683;GO:0002684;GO:0002685;GO:0002687;GO:0002688;GO:0002690;GO:0002694;GO:0002696;GO:0003151;GO:0003197;GO:0003417;GO:0005975;GO:0006140;GO:…	GO:0001786;GO:0001871;GO:0001948;GO:0001968;GO:0005102;GO:0005178;GO:0005488;GO:0005509;GO:0005515;GO:0005518;GO:0005539;GO:0005543;GO:0008201;GO:0008289;GO:0017134;GO:0019838;GO:0019955;GO:0030169;GO:0030246;GO:0030247;GO:0032403;GO:0042802;GO:0043167;GO:0043169;GO:0043236;GO:0043394;GO:0046872;GO:0050431;GO:0050840;GO:0070051;GO:0070052;GO:0071813;GO:0071814	GO:0005576;GO:0005577;GO:0005615;GO:0005783;GO:0005788;GO:0009897;GO:0009986;GO:0016023;GO:0016529;GO:0030141;GO:0031012;GO:0031091;GO:0031093;GO:0031410;GO:0031974;GO:0031982;GO:0031983;GO:0031988;GO:0032991;GO:0034774;GO:0043226;GO:0043227;GO:0043229;GO:0043230;GO:0043231;GO:0043233;GO:0043234;GO:0044421;GO:0044422;GO:0044424;GO:0044425;GO:0044432;GO:0044433;GO:0044444;GO:0044446;GO:0044459;GO:…	7	7	7	66	66	66	12938	0	52924	1609800000	61	53	621044	252070
0	0	192470	0	35792	0	59848	66693	69703	0	0	0	0	52886	0	0	0	0	0	53419	0	0	0	0	0				actin cytoskeleton organization;actin filament organization;actin filament-based process;actin rod assembly;activation of immune response;activation of innate immune response;anatomical structure development;apoptosis;axon guidance;biological regulation;cardiac muscle cell apoptosis;catabolic process;cell cycle;cell cycle process;cell death;cell migration;cell motility;cell surface receptor linke…	adenyl deoxyribonucleotide binding;adenyl nucleotide binding;adenyl ribonucleotide binding;antigen binding;ATP binding;ATPase activity;binding;calcium ion binding;catalytic activity;cation binding;CTP binding;dATP binding;deoxyribonucleotide binding;double-stranded RNA binding;enzyme binding;enzyme regulator activity;GTP binding;GTPase binding;guanyl nucleotide binding;guanyl ribonucleotide bindi…	adherens junction;anchoring junction;apical plasma membrane;basolateral plasma membrane;brush border membrane;cell body;cell junction;cell part;cell projection;cell projection membrane;cell projection part;cell surface;cell-substrate adherens junction;cell-substrate junction;cytoplasm;cytoplasmic membrane-bounded vesicle;cytoplasmic membrane-bounded vesicle lumen;cytoplasmic part;cytoplasmic vesi…	Antigen processing and presentation;NOD-like receptor signaling pathway;Pathways in cancer;Plant-pathogen interaction;Progesterone-mediated oocyte maturation;Prostate cancer;Protein processing in endoplasmic reticulum	3D-structure;Acetylation;Alternativesplicing;ATP-binding;Calcium;Cellmembrane;Chaperone;Completeproteome;Cytoplasm;Directproteinsequencing;Disulfidebond;Endoplasmicreticulum;Glycoprotein;Membrane;Nucleotide-binding;Phosphoprotein;Polymorphism;Proteomicsidentification;Referenceproteome;Signal;S-nitrosylation;Stressresponse;Ublconjugation	GO:0000086;GO:0000278;GO:0001666;GO:0001764;GO:0001890;GO:0001959;GO:0002218;GO:0002221;GO:0002224;GO:0002253;GO:0002376;GO:0002682;GO:0002684;GO:0002757;GO:0002758;GO:0002764;GO:0003008;GO:0003009;GO:0003012;GO:0006457;GO:0006461;GO:0006508;GO:0006511;GO:0006605;GO:0006612;GO:0006626;GO:0006807;GO:0006810;GO:0006839;GO:0006886;GO:0006897;GO:0006898;GO:0006915;GO:0006928;GO:0006935;GO:0006936;GO:…	GO:0000166;GO:0002134;GO:0002135;GO:0003676;GO:0003723;GO:0003725;GO:0003729;GO:0003823;GO:0003824;GO:0005102;GO:0005488;GO:0005509;GO:0005515;GO:0005524;GO:0005525;GO:0016462;GO:0016787;GO:0016817;GO:0016818;GO:0016887;GO:0017076;GO:0017111;GO:0019001;GO:0019103;GO:0019899;GO:0019900;GO:0019902;GO:0019903;GO:0019904;GO:0023023;GO:0023026;GO:0030234;GO:0030235;GO:0030554;GO:0030911;GO:0032552;GO:…	GO:0005576;GO:0005634;GO:0005654;GO:0005737;GO:0005739;GO:0005783;GO:0005788;GO:0005789;GO:0005829;GO:0005886;GO:0005912;GO:0005924;GO:0005925;GO:0009986;GO:0016020;GO:0016023;GO:0016323;GO:0016324;GO:0030054;GO:0030055;GO:0030496;GO:0031012;GO:0031090;GO:0031253;GO:0031410;GO:0031526;GO:0031974;GO:0031982;GO:0031983;GO:0031988;GO:0032991;GO:0042470;GO:0042995;GO:0043005;GO:0043025;GO:0043226;GO:…	2	2	2	36	36	36	83263	0	18679	75372000	35	5	70768.8	161996
330580	434220	440110	0	0	138480	134340	0	0	0	0	0	0	181680	175760	209680	224160	168810	108690	265000	135760	233380	350480	208970	388600				axon guidance;biological adhesion;biological regulation;blood coagulation;cell activation;cell adhesion;cell surface receptor linked signaling pathway;cell-cell adhesion;cell-matrix adhesion;cell-substrate adhesion;cellular component organization;cellular component organization at cellular level;cellular component organization or biogenesis;cellular component organization or biogenesis at cellula…	binding;cation binding;extracellular matrix binding;identical protein binding;ion binding;metal ion binding;protein binding	adherens junction;anchoring junction;blood microparticle;cell junction;cell part;cell surface;cell-substrate adherens junction;cell-substrate junction;cytoplasmic part;cytoplasmic vesicle membrane;cytoplasmic vesicle part;external side of plasma membrane;extracellular membrane-bounded organelle;extracellular organelle;extracellular region part;extracellular vesicular exosome;focal adhesion;integr…	Arrhythmogenic right ventricular cardiomyopathy (ARVC);Dilated cardiomyopathy;ECM-receptor interaction;Focal adhesion;Hematopoietic cell lineage;Hypertrophic cardiomyopathy (HCM);Pathways in cancer;Regulation of actin cytoskeleton;Small cell lung cancer	3D-structure;Alternativesplicing;Calcium;Celladhesion;Cleavageonpairofbasicresidues;Completeproteome;Directproteinsequencing;Diseasemutation;Disulfidebond;Glycoprotein;Integrin;Membrane;Metal-binding;Polymorphism;Pyrrolidonecarboxylicacid;Receptor;Referenceproteome;Repeat;Signal;Transmembrane;Transmembranehelix	GO:0001775;GO:0002576;GO:0002682;GO:0002684;GO:0002685;GO:0002687;GO:0006810;GO:0006887;GO:0006935;GO:0007155;GO:0007160;GO:0007165;GO:0007166;GO:0007229;GO:0007411;GO:0007596;GO:0007599;GO:0009605;GO:0009987;GO:0016043;GO:0016192;GO:0016337;GO:0022610;GO:0030168;GO:0030198;GO:0030334;GO:0030335;GO:0031589;GO:0032501;GO:0032879;GO:0032940;GO:0034109;GO:0040011;GO:0040012;GO:0040017;GO:0042221;GO:…	GO:0005488;GO:0005515;GO:0042802;GO:0043167;GO:0043169;GO:0046872;GO:0050840	GO:0005886;GO:0005887;GO:0005912;GO:0005924;GO:0005925;GO:0008305;GO:0009897;GO:0009986;GO:0012506;GO:0016020;GO:0016021;GO:0030054;GO:0030055;GO:0030659;GO:0030667;GO:0031090;GO:0031092;GO:0031224;GO:0031226;GO:0031982;GO:0031988;GO:0032991;GO:0043226;GO:0043227;GO:0043230;GO:0043234;GO:0043235;GO:0044421;GO:0044422;GO:0044424;GO:0044425;GO:0044433;GO:0044444;GO:0044446;GO:0044459;GO:0044464;GO:…	3	3	3	29	29	29	11338	0	25481	228390000	37	19	190086	186121
3534500	1931300	2392900	7912500	11077000	8021800	1924000	6524700	6704200	6538100	3551000	2523800	7763300	3995700	4442300	4489500	4407900	7001800	4665700	3287000	875750	3696000	5960900	6393300	5716400				anatomical structure development;anatomical structure homeostasis;anatomical structure morphogenesis;biological regulation;blood circulation;blood vessel development;cell differentiation;cell differentiation involved in embryonic placenta development;cell migration;cell motility;cellular component movement;cellular component organization;cellular component organization or biogenesis;cellular deve…	apolipoprotein binding;binding;carbohydrate binding;catalytic activity;endopeptidase activity;endopeptidase inhibitor activity;endopeptidase regulator activity;enzyme inhibitor activity;enzyme regulator activity;fibronectin binding;glycosaminoglycan binding;heparin binding;hydrolase activity;pattern binding;peptidase activity;peptidase activity, acting on L-amino acid peptides;peptidase inhibitor…	cell part;extracellular region;extracellular region part;extrinsic to membrane;extrinsic to plasma membrane;intracellular membrane-bounded organelle;intracellular organelle;intracellular part;macromolecular complex;membrane part;membrane-bounded organelle;organelle;plasma lipoprotein particle;plasma membrane part;protein-lipid complex		3D-structure;Atherosclerosis;Autocatalyticcleavage;Completeproteome;Disulfidebond;Glycoprotein;Hydrolase;Kringle;Lipidtransport;Polymorphism;Protease;Referenceproteome;Repeat;Serineprotease;Signal;Transport	GO:0001568;GO:0002376;GO:0003008;GO:0003013;GO:0006508;GO:0006629;GO:0006810;GO:0006869;GO:0006897;GO:0006898;GO:0006928;GO:0008015;GO:0008152;GO:0009653;GO:0009888;GO:0009987;GO:0010324;GO:0010466;GO:0010951;GO:0016043;GO:0016044;GO:0016192;GO:0016477;GO:0019222;GO:0019538;GO:0019725;GO:0030154;GO:0031099;GO:0032501;GO:0032502;GO:0040007;GO:0040011;GO:0042157;GO:0042246;GO:0042592;GO:0042692;GO:…	GO:0001871;GO:0001968;GO:0003824;GO:0004175;GO:0004252;GO:0004857;GO:0004866;GO:0005488;GO:0005515;GO:0005539;GO:0008201;GO:0008233;GO:0008236;GO:0016787;GO:0017171;GO:0030234;GO:0030246;GO:0030247;GO:0030414;GO:0034185;GO:0061134;GO:0061135;GO:0070011	GO:0005576;GO:0019897;GO:0019898;GO:0032991;GO:0032994;GO:0034358;GO:0043226;GO:0043227;GO:0043229;GO:0043231;GO:0044421;GO:0044424;GO:0044425;GO:0044459;GO:0044464	33	33	33	449	449	449	50131	0	32331	42562000000	172	493	3.69476e+06	2.43933e+06
1756000	1420000	1759100	320660	202940	179400	122240	134920	0	69471	81872	0	94702	640560	297150	540310	0	155970	53721	719120	521430	462330	350620	152570	190340				actin filament-based movement;actin filament-based process;actin-mediated cell contraction;actin-myosin filament sliding;anatomical structure development;apoptosis;astrocyte development;astrocyte differentiation;Bergmann glial cell differentiation;biological regulation;cell death;cell development;cell differentiation;cellular component disassembly;cellular component disassembly at cellular level;…	binding;double-stranded RNA binding;glycoprotein binding;identical protein binding;nucleic acid binding;protein binding;protein C-terminus binding;RNA binding;scaffold protein binding;structural constituent of cytoskeleton;structural constituent of eye lens;structural molecule activity	adherens junction;anchoring junction;cell junction;cell leading edge;cell part;cell projection;cell-substrate adherens junction;cell-substrate junction;cytoplasm;cytoplasmic part;cytoskeletal part;cytoskeleton;cytosol;extracellular membrane-bounded organelle;extracellular organelle;extracellular region part;extracellular vesicular exosome;focal adhesion;intermediate filament;intermediate filament…		3D-structure;Acetylation;Cataract;Coiledcoil;Completeproteome;Cytoplasm;Directproteinsequencing;Diseasemutation;Glycoprotein;Host-virusinteraction;Intermediatefilament;Phosphoprotein;Proteomicsidentification;Referenceproteome;S-nitrosylation	GO:0006915;GO:0006921;GO:0006928;GO:0006996;GO:0007010;GO:0007165;GO:0008219;GO:0009893;GO:0009987;GO:0010001;GO:0010468;GO:0010604;GO:0010628;GO:0010975;GO:0010977;GO:0012501;GO:0014002;GO:0016032;GO:0016043;GO:0016265;GO:0019222;GO:0021782;GO:0022411;GO:0030029;GO:0030048;GO:0030049;GO:0030154;GO:0031344;GO:0031345;GO:0032502;GO:0033275;GO:0045103;GO:0045104;GO:0045109;GO:0045595;GO:0045664;GO:…	GO:0001948;GO:0003676;GO:0003723;GO:0003725;GO:0005198;GO:0005200;GO:0005212;GO:0005488;GO:0005515;GO:0008022;GO:0042802;GO:0097110	GO:0005737;GO:0005777;GO:0005829;GO:0005856;GO:0005882;GO:0005886;GO:0005912;GO:0005924;GO:0005925;GO:0016020;GO:0030054;GO:0030055;GO:0031252;GO:0031982;GO:0031988;GO:0032991;GO:0042579;GO:0042995;GO:0043005;GO:0043226;GO:0043227;GO:0043228;GO:0043229;GO:0043230;GO:0043231;GO:0043232;GO:0043234;GO:0044421;GO:0044422;GO:0044424;GO:0044430;GO:0044444;GO:0044446;GO:0044464;GO:0045111;GO:0065010;GO:…	13	13	12	376	376	356	53651	0	98837	964940000	32	60	779454	1.10265e+06
208380	236780	218310	119120	122060	131510	181570	94487	138070	158760	121610	0	0	138300	59755	107270	0	0	167410	149680	140530	159750	196520	166620	141620				aging;anatomical structure development;behavior;biological regulation;cAMP-mediated signaling;cell projection organization;cell surface receptor linked signaling pathway;cellular component organization;cellular component organization at cellular level;cellular component organization or biogenesis;cellular component organization or biogenesis at cellular level;cellular process;cellular response to…	binding;catalytic activity;cation binding;corticotropin-releasing hormone receptor 1 binding;corticotropin-releasing hormone receptor binding;G-protein beta/gamma-subunit complex binding;G-protein-coupled receptor binding;GTP binding;GTPase activity;guanyl nucleotide binding;guanyl ribonucleotide binding;hormone receptor binding;hydrolase activity;hydrolase activity, acting on acid anhydrides;hyd…	cell part;cell projection;extrinsic to internal side of plasma membrane;extrinsic to membrane;extrinsic to plasma membrane;heterotrimeric G-protein complex;intracellular part;macromolecular complex;membrane;membrane part;neuron projection;plasma membrane;plasma membrane part;protein complex	Chagas disease (American trypanosomiasis);Long-term depression;Melanogenesis;Toxoplasmosis	ADP-ribosylation;Alternativesplicing;Cellmembrane;Completeproteome;Diseasemutation;Epilepsy;GTP-binding;Lipoprotein;Magnesium;Membrane;Metal-binding;Myristate;Nucleotide-binding;Palmitate;Phosphoprotein;Referenceproteome;Transducer	GO:0000302;GO:0003008;GO:0003012;GO:0006140;GO:0006936;GO:0006950;GO:0006979;GO:0007165;GO:0007166;GO:0007186;GO:0007187;GO:0007188;GO:0007212;GO:0007568;GO:0007610;GO:0007626;GO:0008016;GO:0008152;GO:0009894;GO:0009987;GO:0010033;GO:0010035;GO:0010959;GO:0014070;GO:0014072;GO:0016043;GO:0019219;GO:0019222;GO:0019932;GO:0019933;GO:0019935;GO:0030030;GO:0030811;GO:0030900;GO:0031175;GO:0031323;GO:…	GO:0000166;GO:0001664;GO:0003824;GO:0003924;GO:0004871;GO:0005102;GO:0005488;GO:0005515;GO:0005525;GO:0016462;GO:0016787;GO:0016817;GO:0016818;GO:0017076;GO:0017111;GO:0019001;GO:0031628;GO:0031683;GO:0031821;GO:0031852;GO:0032403;GO:0032553;GO:0032555;GO:0032561;GO:0035639;GO:0043167;GO:0043169;GO:0046872;GO:0051427;GO:0051428;GO:0051429;GO:0051430;GO:0060089;GO:0071855	GO:0005834;GO:0005886;GO:0016020;GO:0019897;GO:0019898;GO:0031234;GO:0032991;GO:0042995;GO:0043005;GO:0043234;GO:0044424;GO:0044425;GO:0044459;GO:0044464	3	3	3	105	105	105	4005	0	18818	155620000	17	11	49428.3	273049
76296	75866	211890	0	0	11897	0	0	0	0	0	0	0	258990	289540	185870	114690	128620	139870	248620	213090	251090	259940	242400	265790				adult behavior;adult locomotory behavior;aging;anatomical structure development;anatomical structure morphogenesis;axonogenesis;behavior;biological regulation;catabolic process;cell communication;cell differentiation;cell part morphogenesis;cell projection morphogenesis;cell projection organization;cell-cell signaling;cellular catabolic process;cellular component morphogenesis;cellular component …	2',3'-cyclic-nucleotide 3'-phosphodiesterase activity;binding;catalytic activity;cyclic nucleotide binding;cyclic-nucleotide phosphodiesterase activity;hydrolase activity;hydrolase activity, acting on ester bonds;nucleic acid binding;nucleotide binding;phosphoric diester hydrolase activity;phosphoric ester hydrolase activity;RNA binding	cell part;cell projection;cytoplasm;cytoplasmic membrane-bounded vesicle;cytoplasmic part;cytoplasmic vesicle;cytoskeletal part;extracellular membrane-bounded organelle;extracellular organelle;extracellular region part;extracellular space;extracellular vesicular exosome;intracellular membrane-bounded organelle;intracellular organelle;intracellular organelle part;intracellular part;macromolecular …		3D-structure;Alternativesplicing;Completeproteome;Directproteinsequencing;Hydrolase;Lipoprotein;Membrane;Methylation;Phosphoprotein;Polymorphism;Prenylation;Referenceproteome;RNA-binding	GO:0000226;GO:0002237;GO:0006139;GO:0006753;GO:0006807;GO:0006996;GO:0007005;GO:0007006;GO:0007010;GO:0007017;GO:0007154;GO:0007267;GO:0007268;GO:0007409;GO:0007568;GO:0007610;GO:0007626;GO:0008152;GO:0008344;GO:0009056;GO:0009117;GO:0009123;GO:0009125;GO:0009166;GO:0009187;GO:0009214;GO:0009607;GO:0009636;GO:0009653;GO:0009987;GO:0010001;GO:0010033;GO:0016043;GO:0016044;GO:0021762;GO:0023052;GO:…	GO:0000166;GO:0003676;GO:0003723;GO:0003824;GO:0004112;GO:0004113;GO:0005488;GO:0008081;GO:0016787;GO:0016788;GO:0030551;GO:0042578	GO:0005615;GO:0005634;GO:0005654;GO:0005737;GO:0005741;GO:0005743;GO:0005874;GO:0005886;GO:0005902;GO:0016020;GO:0016023;GO:0019866;GO:0019867;GO:0031090;GO:0031143;GO:0031410;GO:0031966;GO:0031968;GO:0031982;GO:0031988;GO:0032991;GO:0035748;GO:0035749;GO:0042470;GO:0042995;GO:0043226;GO:0043227;GO:0043229;GO:0043230;GO:0043231;GO:0043234;GO:0044421;GO:0044422;GO:0044424;GO:0044428;GO:0044429;GO:…	3	3	3	88	88	88	47578	0	2505	205060000	28	10	77915.1	114441
6402800	1379100	8180400	173180	8671400	10522000	9885200	217180	194260	197800	7266700	8061800	248310	11265000	5570100	5291000	14713000	136220	402090	7055900	942430	12644000	626730	8116300	8290100				activation of immune response;biological regulation;cellular component organization;cellular component organization or biogenesis;cellular membrane organization;cellular process;complement activation;complement activation, classical pathway;defense response;endocytosis;establishment of localization;humoral immune response;immune effector process;immune response;immune system process;innate immune…	antigen binding;binding	cell part;extracellular region;extracellular region part;extracellular space;membrane;plasma membrane		Completeproteome;Disulfidebond;ImmunoglobulinCregion;Immunoglobulindomain;Referenceproteome	GO:0002252;GO:0002253;GO:0002376;GO:0002682;GO:0002684;GO:0006810;GO:0006897;GO:0006898;GO:0006950;GO:0006952;GO:0006955;GO:0006956;GO:0006958;GO:0006959;GO:0008152;GO:0009987;GO:0010324;GO:0016043;GO:0016044;GO:0016192;GO:0019538;GO:0043170;GO:0044238;GO:0045087;GO:0048518;GO:0048583;GO:0048584;GO:0050776;GO:0050778;GO:0050789;GO:0050896;GO:0051234;GO:0061024;GO:0065007;GO:0071840;GO:0072376	GO:0003823;GO:0005488	GO:0005576;GO:0005615;GO:0005886;GO:0016020;GO:0044421;GO:0044464	8	3	3	915	34	34	11293	0	27977	2365600000	7	28	4.11146e+06	5.18201e+06
8297400	8030300	7169400	9725800	11861000	9777700	7220300	5581800	10384000	8545300	9947400	10618000	3555000	10362000	8769100	11731000	12652000	4499800	7942600	4167400	4882400	5361700	8556400	8811900	4938900				activation of immune response;anatomical structure morphogenesis;apoptotic mitochondrial changes;biological regulation;blood coagulation;cell activation;cell death;cell morphogenesis;cellular component assembly;cellular component assembly at cellular level;cellular component morphogenesis;cellular component organization;cellular component organization at cellular level;cellular component organiza…	binding;chaperone binding;enzyme binding;misfolded protein binding;protein binding;ubiquitin protein ligase binding	blood microparticle;cell part;chromaffin granule;cytoplasm;cytoplasmic membrane-bounded vesicle;cytoplasmic membrane-bounded vesicle lumen;cytoplasmic part;cytoplasmic vesicle;cytoplasmic vesicle part;cytosol;endoplasmic reticulum;extracellular matrix;extracellular membrane-bounded organelle;extracellular organelle;extracellular region;extracellular region part;extracellular space;extracellular v…		Alternativesplicing;Apoptosis;Chaperone;Complementpathway;Completeproteome;Cytoplasm;Cytoplasmicvesicle;Directproteinsequencing;Disulfidebond;Endoplasmicreticulum;Glycoprotein;Immunity;Innateimmunity;Membrane;Microsome;Mitochondrion;Nucleus;Phosphoprotein;Polymorphism;Proteomicsidentification;Referenceproteome;Secreted;Signal;Ublconjugation	GO:0000902;GO:0001774;GO:0001775;GO:0001817;GO:0001819;GO:0001836;GO:0002252;GO:0002253;GO:0002274;GO:0002376;GO:0002576;GO:0002682;GO:0002684;GO:0006355;GO:0006457;GO:0006461;GO:0006629;GO:0006810;GO:0006869;GO:0006887;GO:0006950;GO:0006952;GO:0006955;GO:0006956;GO:0006958;GO:0006959;GO:0006996;GO:0007005;GO:0007009;GO:0007596;GO:0007599;GO:0008152;GO:0008219;GO:0008637;GO:0009607;GO:0009615;GO:…	GO:0005488;GO:0005515;GO:0019899;GO:0031625;GO:0051087;GO:0051787	GO:0005576;GO:0005615;GO:0005634;GO:0005737;GO:0005739;GO:0005783;GO:0005794;GO:0005829;GO:0016020;GO:0016023;GO:0030141;GO:0031012;GO:0031090;GO:0031093;GO:0031410;GO:0031966;GO:0031974;GO:0031982;GO:0031983;GO:0031988;GO:0032991;GO:0032994;GO:0034358;GO:0034364;GO:0034366;GO:0034774;GO:0042583;GO:0043226;GO:0043227;GO:0043229;GO:0043230;GO:0043231;GO:0043233;GO:0044421;GO:0044422;GO:0044424;GO:…	12	12	12	276	276	276	52494	0	10809	7786700000	19	113	1.69061e+06	2.84635e+06
12202	13015	81572	28412	26539	29742	34828	0	0	0	41927	44804	19485	0	0	0	16656	40884	75982	69872	0	0	44730	63447	86206				anatomical structure development;axon guidance;biological adhesion;cell adhesion;cellular component disassembly;cellular component disassembly at cellular level;cellular component organization;cellular component organization at cellular level;cellular component organization or biogenesis;cellular component organization or biogenesis at cellular level;cellular process;chemotaxis;collagen catabolic…	endopeptidase inhibitor activity;endopeptidase regulator activity;enzyme inhibitor activity;enzyme regulator activity;peptidase inhibitor activity;peptidase regulator activity;serine-type endopeptidase inhibitor activity	anchoring collagen;cell part;collagen;collagen type VI;cytoplasmic part;endoplasmic reticulum lumen;endoplasmic reticulum part;extracellular matrix;extracellular matrix part;extracellular membrane-bounded organelle;extracellular organelle;extracellular region;extracellular region part;extracellular space;extracellular vesicular exosome;intracellular organelle lumen;intracellular organelle part;in…	ECM-receptor interaction;Focal adhesion;Protein digestion and absorption	3D-structure;Alternativesplicing;Celladhesion;Collagen;Completeproteome;Directproteinsequencing;Diseasemutation;Disulfidebond;Extracellularmatrix;Glycoprotein;Hydroxylation;Phosphoprotein;Polymorphism;Proteaseinhibitor;Proteomicsidentification;Pyrrolidonecarboxylicacid;Referenceproteome;Repeat;Secreted;Serineproteaseinhibitor;Signal	GO:0006935;GO:0007155;GO:0007411;GO:0007517;GO:0008152;GO:0009605;GO:0009987;GO:0016043;GO:0022411;GO:0022610;GO:0022617;GO:0030198;GO:0030574;GO:0032501;GO:0032502;GO:0032963;GO:0040011;GO:0042221;GO:0042330;GO:0043062;GO:0043170;GO:0044236;GO:0044243;GO:0044259;GO:0048513;GO:0048856;GO:0050896;GO:0061061;GO:0071840;GO:0071841;GO:0071842;GO:0071845	GO:0004857;GO:0004866;GO:0004867;GO:0030234;GO:0030414;GO:0061134;GO:0061135	GO:0005576;GO:0005578;GO:0005581;GO:0005589;GO:0005615;GO:0005788;GO:0005886;GO:0016020;GO:0030934;GO:0031012;GO:0031974;GO:0031982;GO:0031988;GO:0042383;GO:0043226;GO:0043227;GO:0043230;GO:0043233;GO:0044420;GO:0044421;GO:0044422;GO:0044424;GO:0044432;GO:0044444;GO:0044446;GO:0044464;GO:0065010;GO:0070013;GO:0070062	2	2	2	8	8	8	34367	0	14079	95198000	162	4	23326.7	34468.6
1675800	2035100	2015000	618880	717470	0	58754	75660	482590	557910	0	289840	175050	498910	163150	842770	114110	0	478010	79353	380570	183420	0	0	144590				adenine transport;apoptotic mitochondrial changes;biological regulation;cellular component organization;cellular component organization at cellular level;cellular component organization or biogenesis;cellular component organization or biogenesis at cellular level;cellular metabolic process;cellular process;chromosome segregation;energy derivation by oxidation of organic compounds;energy reserve m…	adenine transmembrane transporter activity;binding;enzyme binding;nucleobase transmembrane transporter activity;nucleobase-containing compound transmembrane transporter activity;protein binding;purine base transmembrane transporter activity;substrate-specific transmembrane transporter activity;substrate-specific transporter activity;transmembrane transporter activity;transporter activity;ubiquiti…	cell part;cell projection;cilium;cytoplasmic part;cytoskeletal part;extracellular membrane-bounded organelle;extracellular organelle;extracellular region part;extracellular vesicular exosome;integral to membrane;integral to plasma membrane;intracellular membrane-bounded organelle;intracellular non-membrane-bounded organelle;intracellular organelle;intracellular organelle part;intracellular part;i…	Calcium signaling pathway;Huntington's disease;Parkinson's disease	Acetylation;Cardiomyopathy;Cellprojection;Chromosomepartition;Cilium;Completeproteome;Directproteinsequencing;Diseasemutation;Flagellum;Host-virusinteraction;Isopeptidebond;Membrane;Methylation;Mitochondrion;Mitochondrioninnermembrane;Polymorphism;Progressiveexternalophthalmoplegia;Proteomicsidentification;Referenceproteome;Repeat;S-nitrosylation;Transmembrane;Transmembranehelix;Transport;Ublconj…	GO:0000002;GO:0002791;GO:0006091;GO:0006112;GO:0006810;GO:0006863;GO:0006996;GO:0007005;GO:0007059;GO:0008152;GO:0008284;GO:0008637;GO:0009987;GO:0010646;GO:0010939;GO:0010941;GO:0015851;GO:0015853;GO:0015931;GO:0015980;GO:0016032;GO:0016043;GO:0023051;GO:0032879;GO:0042127;GO:0044237;GO:0044281;GO:0046883;GO:0048518;GO:0048519;GO:0048522;GO:0048523;GO:0050789;GO:0050794;GO:0050796;GO:0051046;GO:…	GO:0005215;GO:0005345;GO:0005488;GO:0005515;GO:0015205;GO:0015207;GO:0015932;GO:0019899;GO:0022857;GO:0022891;GO:0022892;GO:0031625	GO:0005634;GO:0005739;GO:0005743;GO:0005887;GO:0005929;GO:0009295;GO:0016020;GO:0016021;GO:0019866;GO:0031090;GO:0031224;GO:0031226;GO:0031514;GO:0031966;GO:0031982;GO:0031988;GO:0032991;GO:0042645;GO:0042995;GO:0043226;GO:0043227;GO:0043228;GO:0043229;GO:0043230;GO:0043231;GO:0043232;GO:0043234;GO:0044421;GO:0044422;GO:0044424;GO:0044425;GO:0044429;GO:0044430;GO:0044444;GO:0044446;GO:0044459;GO:…	5	5	1	226	226	43	22885	0	31787	569050000	15	24	881976	1.70011e+06
200930	0	0	0	0	208790	0	0	0	0	0	0	0	0	0	0	0	0	0	0	0	0	0	0	0				active induction of host immune response by virus;adenine nucleotide transport;ADP transport;apoptosis;ATP transport;biological regulation;cell death;cellular macromolecule metabolic process;cellular metabolic process;cellular process;cellular protein metabolic process;death;energy derivation by oxidation of organic compounds;energy reserve metabolic process;establishment of localization;establis…	active transmembrane transporter activity;antiporter activity;ATP:ADP antiporter activity;secondary active transmembrane transporter activity;solute:solute antiporter activity;transmembrane transporter activity;transporter activity	cell part;cytoplasmic part;integral to membrane;intracellular membrane-bounded organelle;intracellular organelle;intracellular organelle part;intracellular part;intrinsic to membrane;macromolecular complex;membrane;membrane part;membrane-bounded organelle;mitochondrial inner membrane;mitochondrial inner membrane presequence translocase complex;mitochondrial membrane;mitochondrial membrane part;mi…	Calcium signaling pathway;Huntington's disease;Parkinson's disease	Acetylation;Apoptosis;Completeproteome;Directproteinsequencing;Host-virusinteraction;Membrane;Mitochondrion;Mitochondrioninnermembrane;Polymorphism;Referenceproteome;Repeat;Transmembrane;Transmembranehelix;Transport	GO:0002791;GO:0006091;GO:0006112;GO:0006605;GO:0006626;GO:0006810;GO:0006839;GO:0006862;GO:0006886;GO:0006915;GO:0008152;GO:0008219;GO:0009607;GO:0009987;GO:0010646;GO:0012501;GO:0015031;GO:0015865;GO:0015866;GO:0015867;GO:0015868;GO:0015931;GO:0015980;GO:0016032;GO:0016265;GO:0017038;GO:0019048;GO:0019058;GO:0019538;GO:0022414;GO:0022415;GO:0023051;GO:0031347;GO:0031349;GO:0032879;GO:0035821;GO:…	GO:0005215;GO:0005471;GO:0015291;GO:0015297;GO:0015300;GO:0022804;GO:0022857	GO:0005634;GO:0005739;GO:0005743;GO:0005744;GO:0016020;GO:0016021;GO:0019866;GO:0031090;GO:0031224;GO:0031966;GO:0032991;GO:0043226;GO:0043227;GO:0043229;GO:0043231;GO:0043234;GO:0044422;GO:0044424;GO:0044425;GO:0044429;GO:0044444;GO:0044446;GO:0044455;GO:0044464	5	1	1	181	54	54	32866	0	10808	44395000	20	1	99987.2	264553
0	122690	117450	0	0	0	0	0	63884	111490	0	0	0	112240	84208	71327	0	0	0	99964	0	95901	0	0	0				amine metabolic process;carboxylic acid metabolic process;cellular amine metabolic process;cellular amino acid metabolic process;cellular ketone metabolic process;cellular metabolic process;cellular modified amino acid metabolic process;cellular nitrogen compound metabolic process;cellular process;creatine metabolic process;metabolic process;multicellular organismal process;muscle contraction;mus…	adenyl nucleotide binding;adenyl ribonucleotide binding;ATP binding;binding;catalytic activity;creatine kinase activity;kinase activity;nucleotide binding;phosphotransferase activity, nitrogenous group as acceptor;purine nucleotide binding;purine ribonucleoside triphosphate binding;purine ribonucleotide binding;ribonucleotide binding;transferase activity;transferase activity, transferring phospho…	cell part;cytoplasmic part;extracellular membrane-bounded organelle;extracellular organelle;extracellular region part;extracellular vesicular exosome;intracellular membrane-bounded organelle;intracellular organelle;intracellular organelle part;intracellular part;membrane;membrane-bounded organelle;membrane-bounded vesicle;mitochondrial inner membrane;mitochondrial membrane;mitochondrial part;mito…	Arginine and proline metabolism	3D-structure;Alternativesplicing;ATP-binding;Completeproteome;Directproteinsequencing;Kinase;Membrane;Mitochondrion;Mitochondrioninnermembrane;Nucleotide-binding;Phosphoprotein;Proteomicsidentification;Referenceproteome;Transferase;Transitpeptide	GO:0003008;GO:0003012;GO:0006082;GO:0006520;GO:0006575;GO:0006599;GO:0006600;GO:0006807;GO:0006936;GO:0008152;GO:0009308;GO:0009987;GO:0019752;GO:0032501;GO:0034641;GO:0042180;GO:0043436;GO:0044106;GO:0044237;GO:0044238;GO:0044281	GO:0000166;GO:0003824;GO:0004111;GO:0005488;GO:0005524;GO:0016301;GO:0016740;GO:0016772;GO:0016775;GO:0017076;GO:0030554;GO:0032553;GO:0032555;GO:0032559;GO:0035639	GO:0005739;GO:0005743;GO:0016020;GO:0019866;GO:0031090;GO:0031966;GO:0031982;GO:0031988;GO:0043226;GO:0043227;GO:0043229;GO:0043230;GO:0043231;GO:0044421;GO:0044422;GO:0044424;GO:0044429;GO:0044444;GO:0044446;GO:0044464;GO:0065010;GO:0070062	2	2	2	62	62	62	47036	0	12828	64594000	19	5	58607.7	254885
313300	333720	116410	175780	235940	0	0	137790	0	0	177170	308010	0	148870	171890	0	0	164360	152380	102560	151170	0	130710	144230	194620				binding of sperm to zona pellucida;cell recognition;cell-cell recognition;cellular macromolecule metabolic process;cellular metabolic process;cellular process;cellular process involved in reproduction;cellular protein metabolic process;cellular response to heat;cellular response to stimulus;cellular response to stress;macromolecule metabolic process;metabolic process;primary metabolic process;pro…	adenyl nucleotide binding;adenyl ribonucleotide binding;ATP binding;ATPase activity;ATPase activity, coupled;binding;catalytic activity;enzyme binding;heat shock protein binding;hydrolase activity;hydrolase activity, acting on acid anhydrides;hydrolase activity, acting on acid anhydrides, in phosphorus-containing anhydrides;nucleoside-triphosphatase activity;nucleotide binding;protein binding;pur…	blood microparticle;cell body;cell part;centriole;cytoplasm;cytoplasmic part;cytoskeletal part;cytosol;extracellular membrane-bounded organelle;extracellular organelle;extracellular region part;extracellular vesicular exosome;intracellular non-membrane-bounded organelle;intracellular organelle;intracellular organelle lumen;intracellular organelle part;intracellular part;membrane-bounded organelle…	Antigen processing and presentation;Endocytosis;MAPK signaling pathway;Measles;Protein processing in endoplasmic reticulum;Spliceosome;Toxoplasmosis	3D-structure;Acetylation;Alternativesplicing;ATP-binding;Chaperone;Completeproteome;Cytoplasm;Directproteinsequencing;Hostcellreceptorforvirusentry;Methylation;Nucleotide-binding;Phosphoprotein;Polymorphism;Receptor;Referenceproteome;Stressresponse	GO:0006457;GO:0006950;GO:0006986;GO:0007339;GO:0008037;GO:0008152;GO:0009266;GO:0009408;GO:0009628;GO:0009987;GO:0009988;GO:0010033;GO:0019538;GO:0022414;GO:0033554;GO:0034605;GO:0035036;GO:0035966;GO:0042026;GO:0042221;GO:0043170;GO:0044237;GO:0044238;GO:0044260;GO:0044267;GO:0048610;GO:0050896;GO:0051716	GO:0000166;GO:0003824;GO:0005488;GO:0005515;GO:0005524;GO:0016462;GO:0016787;GO:0016817;GO:0016818;GO:0016887;GO:0017076;GO:0017111;GO:0019899;GO:0030554;GO:0031072;GO:0032553;GO:0032555;GO:0032559;GO:0035639;GO:0042623;GO:0051082	GO:0005654;GO:0005737;GO:0005759;GO:0005814;GO:0005829;GO:0031974;GO:0031982;GO:0031988;GO:0043226;GO:0043227;GO:0043228;GO:0043229;GO:0043230;GO:0043232;GO:0043233;GO:0044297;GO:0044421;GO:0044422;GO:0044424;GO:0044428;GO:0044429;GO:0044430;GO:0044444;GO:0044446;GO:0044450;GO:0044464;GO:0065010;GO:0070013;GO:0070062;GO:0072562	2	1	1	65	3	3	40244	0	70011	104350000	20	7	136846	69049.1
99265	81387	204460	0	205760	0	0	82927	0	137620	0	0	0	0	0	0	0	0	0	72230	0	0	0	0	0				biological regulation;cell communication;cell-cell signaling;cellular process;establishment of localization;establishment of localization in cell;neurotransmitter secretion;neurotransmitter transport;regulation of biological process;regulation of biological quality;regulation of cell communication;regulation of cellular localization;regulation of cellular process;regulation of exocytosis;regulati…	adenyl nucleotide binding;adenyl ribonucleotide binding;ATP binding;binding;catalytic activity;enzyme binding;kinase binding;nucleotide binding;protein binding;protein kinase binding;purine nucleotide binding;purine ribonucleoside triphosphate binding;purine ribonucleotide binding;ribonucleotide binding;transporter activity	cell junction;cell part;cell projection;clathrin-coated vesicle;coated vesicle;cytoplasmic membrane-bounded vesicle;cytoplasmic part;cytoplasmic vesicle;cytosol;dendrite;Golgi apparatus;intracellular membrane-bounded organelle;intracellular organelle;intracellular part;membrane-bounded organelle;membrane-bounded vesicle;neuron projection;organelle;synapse part;synaptic vesicle;vesicle		Actin-binding;Alternativesplicing;Celljunction;Completeproteome;Epilepsy;Glycoprotein;Golgiapparatus;Phosphoprotein;Referenceproteome;Repeat;Synapse	GO:0001505;GO:0006810;GO:0006836;GO:0007154;GO:0007267;GO:0007268;GO:0007269;GO:0009987;GO:0010646;GO:0017157;GO:0023051;GO:0023052;GO:0023061;GO:0031644;GO:0032879;GO:0032940;GO:0044057;GO:0046903;GO:0046928;GO:0050789;GO:0050794;GO:0050804;GO:0051046;GO:0051049;GO:0051234;GO:0051239;GO:0051588;GO:0051649;GO:0051969;GO:0060341;GO:0060627;GO:0065007;GO:0065008;GO:2000300	GO:0000166;GO:0003824;GO:0005215;GO:0005488;GO:0005515;GO:0005524;GO:0017076;GO:0019899;GO:0019900;GO:0019901;GO:0030554;GO:0032553;GO:0032555;GO:0032559;GO:0035639	GO:0005794;GO:0005829;GO:0008021;GO:0016023;GO:0030054;GO:0030135;GO:0030136;GO:0030425;GO:0031410;GO:0031982;GO:0031988;GO:0042995;GO:0043005;GO:0043226;GO:0043227;GO:0043229;GO:0043231;GO:0044424;GO:0044444;GO:0044456;GO:0044464	4	4	4	92	92	92	74111	0	24119	220360000	28	7	91962.7	324003
123910	137700	131130	120220	1370700	34064	0	99355	63336	888350	242540	0	826310	238740	249800	113410	255820	275680	35007	961530	0	177820	143880	182240	0				activation of immune response;activation of innate immune response;acute inflammatory response;acute-phase response;biological regulation;carbohydrate transport;cell activation;cell activation involved in immune response;cell chemotaxis;cell migration;cell motility;cell surface receptor linked signaling pathway;cellular component movement;cellular defense response;cellular process;cellular respon…	binding;lipopolysaccharide binding;lipoteichoic acid binding;protein binding;receptor binding	cell part;cell surface;extracellular membrane-bounded organelle;extracellular organelle;extracellular region;extracellular region part;extracellular space;extracellular vesicular exosome;membrane-bounded organelle;membrane-bounded vesicle;organelle;vesicle	ko05152;Toll-like receptor signaling pathway	Antibiotic;Antimicrobial;Completeproteome;Disulfidebond;Glycoprotein;Immunity;Innateimmunity;Lipidtransport;Polymorphism;Referenceproteome;Secreted;Signal;Transport	GO:0001775;GO:0001817;GO:0001818;GO:0001819;GO:0002218;GO:0002221;GO:0002224;GO:0002232;GO:0002237;GO:0002252;GO:0002253;GO:0002263;GO:0002274;GO:0002275;GO:0002281;GO:0002366;GO:0002376;GO:0002523;GO:0002526;GO:0002682;GO:0002684;GO:0002685;GO:0002687;GO:0002688;GO:0002690;GO:0002694;GO:0002696;GO:0002697;GO:0002699;GO:0002757;GO:0002758;GO:0002764;GO:0006810;GO:0006928;GO:0006935;GO:0006950;GO:…	GO:0001530;GO:0005102;GO:0005488;GO:0005515;GO:0070891	GO:0005576;GO:0005615;GO:0009986;GO:0031982;GO:0031988;GO:0043226;GO:0043227;GO:0043230;GO:0044421;GO:0044464;GO:0065010;GO:0070062	2	2	2	6	6	6	53383	0	15075	364290000	14	4	486580	114917
431770	430910	341230	711810	0	773780	0	0	0	0	0	0	0	656360	806120	870170	747560	645160	0	465270	312720	522350	491530	476010	554160				acute inflammatory response;acute-phase response;biological regulation;defense response;establishment of localization;inflammatory response;regulation of biological process;regulation of immune system process;response to stimulus;response to stress;response to wounding;transport		blood microparticle;extracellular membrane-bounded organelle;extracellular organelle;extracellular region part;extracellular space;extracellular vesicular exosome;membrane-bounded organelle;membrane-bounded vesicle;organelle;vesicle		3D-structure;Acutephase;Completeproteome;Disulfidebond;Glycoprotein;Polymorphism;Pyrrolidonecarboxylicacid;Referenceproteome;Secreted;Signal;Transport	GO:0002526;GO:0002682;GO:0006810;GO:0006950;GO:0006952;GO:0006953;GO:0006954;GO:0009611;GO:0050789;GO:0050896;GO:0051234;GO:0065007		GO:0005615;GO:0031982;GO:0031988;GO:0043226;GO:0043227;GO:0043230;GO:0044421;GO:0065010;GO:0070062;GO:0072562	2	2	2	5	5	5	23602	0	10797	159480000	10	2	305672	335971
20055	25241	139000	420970	385980	340970	397180	37550	100740	115240	1358400	1583200	436680	1015500	639110	486510	1097400	664750	980020	50016	33173	55806	79190	67874	226590				amine metabolic process;aminoglycan metabolic process;biological regulation;carbohydrate metabolic process;glycosaminoglycan metabolic process;hyaluronan metabolic process;macromolecule metabolic process;metabolic process;negative regulation of catalytic activity;negative regulation of endopeptidase activity;negative regulation of hydrolase activity;negative regulation of molecular function;negat…	endopeptidase inhibitor activity;endopeptidase regulator activity;enzyme inhibitor activity;enzyme regulator activity;peptidase inhibitor activity;peptidase regulator activity;serine-type endopeptidase inhibitor activity	blood microparticle;extracellular membrane-bounded organelle;extracellular organelle;extracellular region;extracellular region part;extracellular vesicular exosome;membrane-bounded organelle;membrane-bounded vesicle;organelle;vesicle		Completeproteome;Directproteinsequencing;Disulfidebond;Gamma-carboxyglutamicacid;Glycoprotein;Phosphoprotein;Polymorphism;Proteaseinhibitor;Proteoglycan;Proteomicsidentification;Referenceproteome;Secreted;Serineproteaseinhibitor;Signal	GO:0005975;GO:0005976;GO:0006022;GO:0006807;GO:0008152;GO:0009308;GO:0010466;GO:0010951;GO:0019222;GO:0030203;GO:0030212;GO:0043086;GO:0043170;GO:0044092;GO:0044238;GO:0050789;GO:0050790;GO:0051336;GO:0051346;GO:0052547;GO:0052548;GO:0065007;GO:0065009	GO:0004857;GO:0004866;GO:0004867;GO:0030234;GO:0030414;GO:0061134;GO:0061135	GO:0005576;GO:0031982;GO:0031988;GO:0043226;GO:0043227;GO:0043230;GO:0044421;GO:0065010;GO:0070062;GO:0072562	15	15	15	176	176	176	10521	0	16818	1710800000	47	84	179495	354097
60683	140050	147800	222050	235800	265630	109510	246860	171500	119810	291000	308370	848450	412770	722580	681180	761450	1283600	848300	66435	31595	0	305850	360590	352520				amine metabolic process;aminoglycan metabolic process;carbohydrate metabolic process;glycosaminoglycan metabolic process;hyaluronan metabolic process;macromolecule metabolic process;metabolic process;nitrogen compound metabolic process;polysaccharide metabolic process;primary metabolic process	binding;calcium ion binding;cation binding;endopeptidase inhibitor activity;endopeptidase regulator activity;enzyme inhibitor activity;enzyme regulator activity;ion binding;metal ion binding;peptidase inhibitor activity;peptidase regulator activity;serine-type endopeptidase inhibitor activity	blood microparticle;extracellular membrane-bounded organelle;extracellular organelle;extracellular region;extracellular region part;extracellular vesicular exosome;membrane-bounded organelle;membrane-bounded vesicle;organelle;vesicle		Alternativesplicing;Completeproteome;Directproteinsequencing;Disulfidebond;Glycoprotein;Phosphoprotein;Polymorphism;Proteaseinhibitor;Proteoglycan;Referenceproteome;Secreted;Serineproteaseinhibitor;Signal	GO:0005975;GO:0005976;GO:0006022;GO:0006807;GO:0008152;GO:0009308;GO:0030203;GO:0030212;GO:0043170;GO:0044238	GO:0004857;GO:0004866;GO:0004867;GO:0005488;GO:0005509;GO:0030234;GO:0030414;GO:0043167;GO:0043169;GO:0046872;GO:0061134;GO:0061135	GO:0005576;GO:0031982;GO:0031988;GO:0043226;GO:0043227;GO:0043230;GO:0044421;GO:0065010;GO:0070062;GO:0072562	8	8	8	115	115	115	10139	0	59904	712560000	33	14	74355.9	190903
7337100	6751700	6204700	24795000	44949000	42720000	21818000	65803000	59446000	54699000	78390000	89878000	83114000	4159500	3155800	3055500	9057600	9222300	11446000	7151300	7999700	6055400	13617000	14216000	14651000				activation of immune response;biological regulation;blood coagulation;coagulation;complement activation;complement activation, classical pathway;defense response;hemostasis;humoral immune response;immune effector process;immune response;immune system process;innate immune response;macromolecule metabolic process;metabolic process;multicellular organismal process;negative regulation of biological …		cell part;extracellular region;extracellular region part;extracellular space;membrane;other organism cell;other organism part;plasma membrane	Complement and coagulation cascades	Alternativesplicing;Complementpathway;Completeproteome;Disulfidebond;Glycoprotein;Immunity;Innateimmunity;Polymorphism;Referenceproteome;Repeat;Secreted;Signal;Sushi	GO:0002252;GO:0002253;GO:0002376;GO:0002673;GO:0002682;GO:0002683;GO:0002684;GO:0002697;GO:0002698;GO:0002703;GO:0002706;GO:0002712;GO:0002819;GO:0002822;GO:0002889;GO:0002920;GO:0002921;GO:0002923;GO:0006950;GO:0006952;GO:0006955;GO:0006956;GO:0006958;GO:0006959;GO:0007596;GO:0007599;GO:0008152;GO:0009892;GO:0009893;GO:0009894;GO:0009896;GO:0010468;GO:0010604;GO:0010605;GO:0010955;GO:0019222;GO:…		GO:0005576;GO:0005615;GO:0005886;GO:0016020;GO:0044216;GO:0044217;GO:0044421;GO:0044464	6	6	6	274	274	274	28357	0	75595	18079000000	14	99	1.66372e+07	9.92092e+06
314390	178030	243780	131530	0	130260	128300	0	0	0	0	0	0	139520	172670	0	91902	0	0	92603	0	56185	47290	0	52660				anion transport;apoptosis;behavior;behavioral defense response;behavioral fear response;cell communication;cell death;cell differentiation;cell-cell signaling;cellular developmental process;cellular process;cognition;death;defense response;developmental process;epithelial cell differentiation;establishment of localization;fear response;ion transport;learning;learning or memory;multicellular organ…	anion channel activity;anion transmembrane transporter activity;binding;channel activity;enzyme binding;gated channel activity;ion channel activity;ion transmembrane transporter activity;kinase binding;passive transmembrane transporter activity;porin activity;protein binding;protein kinase binding;substrate-specific channel activity;substrate-specific transmembrane transporter activity;substrate-…	cell part;cytoplasmic part;extracellular membrane-bounded organelle;extracellular organelle;extracellular region part;extracellular vesicular exosome;integral to membrane;intracellular membrane-bounded organelle;intracellular non-membrane-bounded organelle;intracellular organelle;intracellular organelle part;intracellular part;intrinsic to membrane;macromolecular complex;membrane;membrane part;me…	Calcium signaling pathway;Huntington's disease;Parkinson's disease	3D-structure;Acetylation;Apoptosis;Cellmembrane;Completeproteome;Directproteinsequencing;Host-virusinteraction;Iontransport;Isopeptidebond;Membrane;Mitochondrion;Mitochondrionoutermembrane;Phosphoprotein;Porin;Proteomicsidentification;Referenceproteome;Transmembrane;Transmembranebetastrand;Transport;Ublconjugation	GO:0001662;GO:0002209;GO:0003008;GO:0006810;GO:0006811;GO:0006820;GO:0006915;GO:0006950;GO:0006952;GO:0007154;GO:0007267;GO:0007268;GO:0007270;GO:0007610;GO:0007611;GO:0007612;GO:0008219;GO:0009987;GO:0012501;GO:0016032;GO:0016265;GO:0023052;GO:0030154;GO:0030855;GO:0032501;GO:0032502;GO:0033555;GO:0042596;GO:0048869;GO:0050877;GO:0050890;GO:0050896;GO:0051234	GO:0005215;GO:0005216;GO:0005244;GO:0005253;GO:0005488;GO:0005515;GO:0008308;GO:0008509;GO:0015075;GO:0015267;GO:0015288;GO:0019899;GO:0019900;GO:0019901;GO:0022803;GO:0022829;GO:0022832;GO:0022836;GO:0022838;GO:0022857;GO:0022891;GO:0022892	GO:0005634;GO:0005739;GO:0005741;GO:0005743;GO:0005886;GO:0009295;GO:0016020;GO:0016021;GO:0019866;GO:0019867;GO:0031090;GO:0031224;GO:0031966;GO:0031968;GO:0031982;GO:0031988;GO:0032991;GO:0042645;GO:0043226;GO:0043227;GO:0043228;GO:0043229;GO:0043230;GO:0043231;GO:0043232;GO:0043234;GO:0044421;GO:0044422;GO:0044424;GO:0044425;GO:0044429;GO:0044444;GO:0044446;GO:0044464;GO:0046930;GO:0065010;GO:…	2	2	2	74	74	74	30772	0	13212	89496000	17	6	99561.3	205711
864400	843800	786880	113060	118930	185900	131830	115710	221900	202150	0	0	115110	155130	116910	177530	104010	97516	105910	127790	170480	209090	0	60670	59320				ATP biosynthetic process;ATP hydrolysis coupled proton transport;ATP metabolic process;ATP synthesis coupled proton transport;biological regulation;biosynthetic process;cation transport;cellular biosynthetic process;cellular metabolic process;cellular nitrogen compound biosynthetic process;cellular nitrogen compound metabolic process;cellular process;developmental process;electron transport chain…	active transmembrane transporter activity;adenyl nucleotide binding;adenyl ribonucleotide binding;ATP binding;ATPase activity;ATPase activity, coupled;ATPase activity, coupled to movement of substances;ATPase activity, coupled to transmembrane movement of ions;ATPase activity, coupled to transmembrane movement of substances;binding;catalytic activity;cation transmembrane transporter activity;cati…	cell part;cytoplasmic part;extracellular membrane-bounded organelle;extracellular organelle;extracellular region part;extracellular vesicular exosome;intracellular membrane-bounded organelle;intracellular organelle;intracellular organelle lumen;intracellular organelle part;intracellular part;macromolecular complex;membrane;membrane part;membrane-bounded organelle;membrane-bounded vesicle;membrane…	Alzheimer's disease;Huntington's disease;Oxidative phosphorylation;Parkinson's disease	Acetylation;Alternativesplicing;ATP-binding;ATPsynthesis;Cellmembrane;CF(1);Completeproteome;Directproteinsequencing;Diseasemutation;Glycoprotein;Hydrogeniontransport;Iontransport;Membrane;Mitochondrion;Mitochondrioninnermembrane;Nucleotide-binding;Phosphoprotein;Polymorphism;Proteomicsidentification;Pyrrolidonecarboxylicacid;Referenceproteome;Transitpeptide;Transport	GO:0001936;GO:0001937;GO:0006091;GO:0006139;GO:0006163;GO:0006164;GO:0006629;GO:0006753;GO:0006754;GO:0006807;GO:0006810;GO:0006811;GO:0006812;GO:0006818;GO:0006839;GO:0008152;GO:0008285;GO:0009058;GO:0009117;GO:0009141;GO:0009142;GO:0009144;GO:0009145;GO:0009150;GO:0009152;GO:0009165;GO:0009199;GO:0009201;GO:0009205;GO:0009206;GO:0009259;GO:0009260;GO:0009790;GO:0009987;GO:0015672;GO:0015985;GO:…	GO:0000166;GO:0003824;GO:0005102;GO:0005215;GO:0005488;GO:0005515;GO:0005524;GO:0008324;GO:0015075;GO:0015077;GO:0015078;GO:0015399;GO:0015405;GO:0016462;GO:0016787;GO:0016817;GO:0016818;GO:0016820;GO:0016887;GO:0017076;GO:0017111;GO:0019829;GO:0022804;GO:0022857;GO:0022890;GO:0022891;GO:0022892;GO:0030554;GO:0032553;GO:0032555;GO:0032559;GO:0035639;GO:0042287;GO:0042288;GO:0042623;GO:0042625;GO:…	GO:0005739;GO:0005743;GO:0005753;GO:0005759;GO:0005886;GO:0016020;GO:0016469;GO:0019866;GO:0031090;GO:0031966;GO:0031974;GO:0031982;GO:0031988;GO:0032991;GO:0033178;GO:0043226;GO:0043227;GO:0043229;GO:0043230;GO:0043231;GO:0043233;GO:0043234;GO:0044421;GO:0044422;GO:0044424;GO:0044425;GO:0044429;GO:0044444;GO:0044446;GO:0044455;GO:0044464;GO:0045259;GO:0045261;GO:0065010;GO:0070013;GO:0070062	7	7	7	161	161	161	5975	0	71266	484020000	31	33	372565	690671
348620	250930	867130	2192300	46224	291500	308970	2619200	674720	655510	1398900	1059100	1431200	1514300	7199900	2117700	1768500	2109500	2604500	1481500	95672	737400	682630	1372500	349690				alcohol metabolic process;amine metabolic process;aromatic compound catabolic process;biological regulation;carboxylic acid catabolic process;carboxylic acid metabolic process;catabolic process;cellular amine metabolic process;cellular aromatic compound metabolic process;cellular biogenic amine metabolic process;cellular catabolic process;cellular ketone metabolic process;cellular lipid metabolic…	aryldialkylphosphatase activity;arylesterase activity;binding;calcium ion binding;carboxylic ester hydrolase activity;catalytic activity;cation binding;hydrolase activity;hydrolase activity, acting on ester bonds;identical protein binding;ion binding;lipid binding;metal ion binding;phosphatase activity;phospholipid binding;phosphoric ester hydrolase activity;protein binding;protein dimerization a…	blood microparticle;cell part;extracellular membrane-bounded organelle;extracellular organelle;extracellular region;extracellular region part;extracellular space;extracellular vesicular exosome;high-density lipoprotein particle;intracellular membrane-bounded organelle;intracellular organelle;intracellular part;macromolecular complex;membrane-bounded organelle;membrane-bounded vesicle;organelle;pl…	Aminobenzoate degradation;Bisphenol degradation	3D-structure;Calcium;Completeproteome;Directproteinsequencing;Disulfidebond;Glycoprotein;HDL;Hydrolase;Metal-binding;Polymorphism;Referenceproteome;Secreted;Signal	GO:0006066;GO:0006082;GO:0006576;GO:0006629;GO:0006644;GO:0006650;GO:0006725;GO:0006793;GO:0006796;GO:0006807;GO:0008152;GO:0009056;GO:0009308;GO:0009605;GO:0009636;GO:0009987;GO:0009991;GO:0010033;GO:0010874;GO:0010875;GO:0016054;GO:0016311;GO:0019439;GO:0019637;GO:0019752;GO:0031667;GO:0032368;GO:0032370;GO:0032371;GO:0032373;GO:0032374;GO:0032376;GO:0032409;GO:0032411;GO:0032879;GO:0033993;GO:…	GO:0003824;GO:0004063;GO:0004064;GO:0005488;GO:0005509;GO:0005515;GO:0005543;GO:0008289;GO:0016787;GO:0016788;GO:0016791;GO:0042578;GO:0042802;GO:0042803;GO:0043167;GO:0043169;GO:0046872;GO:0046983;GO:0052689	GO:0005576;GO:0005615;GO:0031982;GO:0031988;GO:0032991;GO:0032994;GO:0034358;GO:0034364;GO:0034366;GO:0043226;GO:0043227;GO:0043229;GO:0043230;GO:0043231;GO:0044421;GO:0044424;GO:0044464;GO:0065010;GO:0070062;GO:0072562	10	10	10	42	42	42	39731	0	311	21772000000	15	125	739004	4.77848e+07
203910	226430	142870	417410	276440	330060	0	249680	150360	185720	0	0	172070	187500	0	0	0	230750	0	201600	119530	0	0	0	184450				activation of MAPKK activity;activation of protein kinase activity;apoptosis;axon guidance;biological regulation;biosynthetic process;cell death;cell surface receptor linked signaling pathway;cellular biosynthetic process;cellular component assembly;cellular component organization;cellular component organization or biogenesis;cellular macromolecule metabolic process;cellular metabolic process;cel…	amine binding;amino acid binding;binding;carboxylic acid binding;enzyme binding;histone deacetylase binding;phosphoprotein binding;phosphoserine binding;protein binding;protein binding transcription factor activity;protein domain specific binding;protein phosphorylated amino acid binding;transcription cofactor activity;transcription corepressor activity;transcription factor binding transcription …	adherens junction;anchoring junction;cell junction;cell part;cell-substrate adherens junction;cell-substrate junction;cytoplasm;cytoplasmic membrane-bounded vesicle;cytoplasmic part;cytoplasmic vesicle;cytoplasmic vesicle membrane;cytoplasmic vesicle part;cytosol;extracellular membrane-bounded organelle;extracellular organelle;extracellular region part;extracellular vesicular exosome;focal adhesi…	Cell cycle;Neurotrophin signaling pathway;Oocyte meiosis	3D-structure;Acetylation;Alternativeinitiation;Completeproteome;Cytoplasm;Directproteinsequencing;Host-virusinteraction;Nitration;Phosphoprotein;Polymorphism;Proteomicsidentification;Referenceproteome	GO:0000165;GO:0000186;GO:0001932;GO:0002376;GO:0006139;GO:0006352;GO:0006355;GO:0006367;GO:0006461;GO:0006464;GO:0006468;GO:0006605;GO:0006793;GO:0006796;GO:0006807;GO:0006810;GO:0006886;GO:0006915;GO:0006935;GO:0006950;GO:0006952;GO:0006955;GO:0007165;GO:0007166;GO:0007167;GO:0007169;GO:0007173;GO:0007243;GO:0007264;GO:0007265;GO:0007411;GO:0008152;GO:0008219;GO:0008286;GO:0008543;GO:0009058;GO:…	GO:0000988;GO:0000989;GO:0003712;GO:0003714;GO:0005488;GO:0005515;GO:0016597;GO:0019899;GO:0019904;GO:0031406;GO:0042826;GO:0043176;GO:0045309;GO:0050815;GO:0051219	GO:0005634;GO:0005737;GO:0005829;GO:0005912;GO:0005924;GO:0005925;GO:0012506;GO:0016020;GO:0016023;GO:0017053;GO:0030054;GO:0030055;GO:0030659;GO:0031090;GO:0031410;GO:0031982;GO:0031988;GO:0032991;GO:0042470;GO:0043226;GO:0043227;GO:0043229;GO:0043230;GO:0043231;GO:0043234;GO:0044421;GO:0044422;GO:0044424;GO:0044428;GO:0044433;GO:0044444;GO:0044446;GO:0044451;GO:0044464;GO:0048471;GO:0048770;GO:…	2	1	1	98	57	57	28082	83682	65011	69751000	14	1	134445	92625.1
458740	0	391670	285070	461890	465150	0	649720	408160	442400	0	0	277720	118770	622740	495550	233350	532010	328450	232310	370030	344490	517550	619500	567500				anatomical structure development;apoptosis;apoptotic mitochondrial changes;biological regulation;biosynthetic process;C21-steroid hormone catabolic process;C21-steroid hormone metabolic process;catabolic process;cell death;cell development;cellular biosynthetic process;cellular component organization;cellular component organization at cellular level;cellular component organization or biogenesis;c…	binding;channel regulator activity;enzyme binding;enzyme inhibitor activity;enzyme regulator activity;glucocorticoid receptor binding;hormone receptor binding;insulin-like growth factor receptor binding;ion channel binding;kinase inhibitor activity;kinase regulator activity;nuclear hormone receptor binding;protein binding;protein dimerization activity;protein domain specific binding;protein heter…	adherens junction;anchoring junction;cell junction;cell part;cell-cell contact zone;cell-cell junction;cell-substrate adherens junction;cell-substrate junction;cytoplasm;cytoplasmic part;cytoplasmic vesicle membrane;cytoplasmic vesicle part;cytosol;extracellular membrane-bounded organelle;extracellular organelle;extracellular region part;extracellular space;extracellular vesicular exosome;focal a…	Aldosterone-regulated sodium reabsorption;Cell cycle;Neurotrophin signaling pathway;Oocyte meiosis;p53 signaling pathway	3D-structure;Acetylation;Alternativesplicing;Completeproteome;Cytoplasm;Directproteinsequencing;Nitration;Nucleus;Phosphoprotein;Polymorphism;Referenceproteome;Secreted;Ublconjugation	GO:0000079;GO:0001558;GO:0001836;GO:0001932;GO:0002028;GO:0002064;GO:0003334;GO:0006139;GO:0006352;GO:0006355;GO:0006367;GO:0006469;GO:0006605;GO:0006629;GO:0006706;GO:0006713;GO:0006807;GO:0006810;GO:0006886;GO:0006915;GO:0006917;GO:0006950;GO:0006974;GO:0006996;GO:0007005;GO:0007165;GO:0007264;GO:0008152;GO:0008202;GO:0008207;GO:0008208;GO:0008211;GO:0008219;GO:0008285;GO:0008629;GO:0008630;GO:…	GO:0004857;GO:0004860;GO:0005102;GO:0005159;GO:0005488;GO:0005515;GO:0008426;GO:0016247;GO:0017080;GO:0019207;GO:0019210;GO:0019887;GO:0019899;GO:0019904;GO:0030234;GO:0030291;GO:0035257;GO:0035258;GO:0035259;GO:0044325;GO:0046982;GO:0046983;GO:0047485;GO:0051427	GO:0005615;GO:0005634;GO:0005737;GO:0005829;GO:0005886;GO:0005911;GO:0005912;GO:0005924;GO:0005925;GO:0012506;GO:0014704;GO:0016020;GO:0030054;GO:0030055;GO:0030659;GO:0031090;GO:0031982;GO:0031988;GO:0032991;GO:0043226;GO:0043227;GO:0043229;GO:0043230;GO:0043231;GO:0043234;GO:0044291;GO:0044421;GO:0044422;GO:0044424;GO:0044433;GO:0044444;GO:0044446;GO:0044464;GO:0065010;GO:0070062;GO:0070161	2	1	1	73	32	32	27774	4329	65922	200640000	16	12	210992	169596
161130	351490	868150	795430	116140	173430	266650	238200	0	35537	0	173940	175970	213870	211440	155480	48576	58704	24147	99475	304230	82294	340310	278160	236500				acetyl-CoA catabolic process;acetyl-CoA metabolic process;alcohol biosynthetic process;alcohol metabolic process;biosynthetic process;carbohydrate biosynthetic process;carbohydrate metabolic process;carboxylic acid metabolic process;catabolic process;cellular biosynthetic process;cellular carbohydrate biosynthetic process;cellular carbohydrate metabolic process;cellular catabolic process;cellular…	catalytic activity;L-malate dehydrogenase activity;malate dehydrogenase (NADP+) activity;malate dehydrogenase activity;oxidoreductase activity;oxidoreductase activity, acting on CH-OH group of donors;oxidoreductase activity, acting on the CH-OH group of donors, NAD or NADP as acceptor	cell part;cytoplasmic part;extracellular membrane-bounded organelle;extracellular organelle;extracellular region part;extracellular vesicular exosome;intracellular membrane-bounded organelle;intracellular organelle;intracellular organelle lumen;intracellular organelle part;intracellular part;membrane;membrane-bounded organelle;membrane-bounded vesicle;membrane-enclosed lumen;mitochondrial inner m…	Carbon fixation in photosynthetic organisms;Citrate cycle (TCA cycle);Glyoxylate and dicarboxylate metabolism;Pyruvate metabolism	3D-structure;Acetylation;Alternativesplicing;Completeproteome;Glycoprotein;Mitochondrion;NAD;Oxidoreductase;Polymorphism;Proteomicsidentification;Referenceproteome;Transitpeptide;Tricarboxylicacidcycle	GO:0005975;GO:0005996;GO:0006006;GO:0006066;GO:0006082;GO:0006084;GO:0006094;GO:0006099;GO:0006107;GO:0006108;GO:0006139;GO:0006464;GO:0006473;GO:0006475;GO:0006732;GO:0006733;GO:0006734;GO:0006753;GO:0006807;GO:0008152;GO:0009056;GO:0009058;GO:0009109;GO:0009117;GO:0009987;GO:0016051;GO:0019318;GO:0019319;GO:0019362;GO:0019538;GO:0019674;GO:0019752;GO:0034637;GO:0034641;GO:0042180;GO:0043170;GO:…	GO:0003824;GO:0016491;GO:0016614;GO:0016615;GO:0016616;GO:0030060;GO:0046554	GO:0005634;GO:0005654;GO:0005739;GO:0005743;GO:0005759;GO:0005886;GO:0016020;GO:0019866;GO:0031090;GO:0031966;GO:0031974;GO:0031982;GO:0031988;GO:0043226;GO:0043227;GO:0043229;GO:0043230;GO:0043231;GO:0043233;GO:0044421;GO:0044422;GO:0044424;GO:0044428;GO:0044429;GO:0044444;GO:0044446;GO:0044464;GO:0065010;GO:0070013;GO:0070062	6	6	6	228	228	228	35503	0	57648	454790000	20	13	311978	1.23769e+06
8438200	44068	12867000	4187600	2257900	4071800	3687600	1743200	4034500	5059300	25483000	607330	9265000	23288000	29410000	31424000	38935000	4495900	6644500	7401600	26374000	6925900	13866000	237830	14760000				biological regulation;chemical homeostasis;homeostatic process;lipid homeostasis;lipid metabolic process;metabolic process;positive regulation of biological process;positive regulation of lipid storage;positive regulation of sequestering of triglyceride;primary metabolic process;regulation of biological process;regulation of biological quality;regulation of lipid storage;regulation of localizatio…	lipid transporter activity;substrate-specific transporter activity;transporter activity	extracellular region part;high-density lipoprotein particle;macromolecular complex;plasma lipoprotein particle;protein-lipid complex;triglyceride-rich lipoprotein particle;very-low-density lipoprotein particle		Completeproteome;Glycoprotein;Lipidtransport;Polymorphism;Referenceproteome;Secreted;Signal;Transport	GO:0006629;GO:0008152;GO:0010883;GO:0010884;GO:0010889;GO:0010890;GO:0032879;GO:0042592;GO:0044238;GO:0048518;GO:0048878;GO:0050789;GO:0055088;GO:0065007;GO:0065008;GO:0070328	GO:0005215;GO:0005319;GO:0022892	GO:0032991;GO:0032994;GO:0034358;GO:0034361;GO:0034364;GO:0034385;GO:0044421	5	3	3	244	157	157	14553	0	31613	4882400000	6	70	4.26207e+06	3.3772e+06
11840000	11285000	10028000	1288300	1045500	1237900	1139900	3465000	2695900	1050000	240340	194700	545870	3600100	6046400	5590200	3620300	4157400	1154100	6395000	8142200	4510500	6258400	6236800	5231000				anatomical structure development;astrocyte development;axon ensheathment;axon ensheathment in central nervous system;biological regulation;biosynthetic process;carboxylic acid biosynthetic process;carboxylic acid metabolic process;cell communication;cell development;cell maturation;cell surface receptor linked signaling pathway;cell-cell signaling;cellular biosynthetic process;cellular developmen…	structural constituent of myelin sheath;structural molecule activity	cell part;integral to membrane;intrinsic to membrane;membrane;membrane part;myelin sheath;plasma membrane		3D-structure;Alternativesplicing;Cellmembrane;Completeproteome;Directproteinsequencing;Diseasemutation;Disulfidebond;Hereditaryspasticparaplegia;Leukodystrophy;Lipoprotein;Membrane;Neurodegeneration;Palmitate;Referenceproteome;Transmembrane;Transmembranehelix	GO:0001676;GO:0006082;GO:0006629;GO:0006631;GO:0006633;GO:0006950;GO:0006952;GO:0006954;GO:0007154;GO:0007165;GO:0007166;GO:0007229;GO:0007267;GO:0007268;GO:0007272;GO:0008152;GO:0008366;GO:0008610;GO:0009058;GO:0009611;GO:0009893;GO:0009987;GO:0010468;GO:0010604;GO:0010628;GO:0014002;GO:0016053;GO:0019222;GO:0019752;GO:0021700;GO:0021762;GO:0021782;GO:0022010;GO:0023052;GO:0032291;GO:0032502;GO:…	GO:0005198;GO:0019911	GO:0005886;GO:0016020;GO:0016021;GO:0031224;GO:0043209;GO:0044425;GO:0044464	6	6	6	238	238	238	30077	0	71937	2463500000	10	60	5.30509e+06	7.26166e+06
0	0	0	0	0	0	0	0	0	0	0	0	0	0	0	105260	0	0	0	0	96792	0	0	0	0				adherens junction organization;anatomical structure development;anatomical structure homeostasis;ATP-dependent chromatin remodeling;axon guidance;biological adhesion;biological regulation;blood coagulation;cell adhesion;cell junction assembly;cell junction organization;cell surface receptor linked signaling pathway;cell-cell adhesion;cell-cell junction organization;cellular component assembly;cel…	adenyl nucleotide binding;adenyl ribonucleotide binding;ATP binding;binding;cytoskeletal protein binding;enzyme binding;identical protein binding;kinesin binding;nitric-oxide synthase binding;nucleotide binding;protein binding;purine nucleotide binding;purine ribonucleoside triphosphate binding;purine ribonucleotide binding;ribonucleotide binding;structural constituent of cytoskeleton;structural …	adherens junction;anchoring junction;axon;blood microparticle;cell cortex part;cell junction;cell part;cell projection;cell-substrate adherens junction;cell-substrate junction;chromatin;chromosomal part;cortical cytoskeleton;cytoplasm;cytoplasmic part;cytoskeletal part;cytoskeleton;cytosol;extracellular membrane-bounded organelle;extracellular organelle;extracellular region part;extracellular spa…	Adherens junction;Arrhythmogenic right ventricular cardiomyopathy (ARVC);Bacterial invasion of epithelial cells;Dilated cardiomyopathy;Focal adhesion;Hypertrophic cardiomyopathy (HCM);Leukocyte transendothelial migration;Pathogenic Escherichia coli infection;Phagosome;Phototransduction - fly;Regulation of actin cytoskeleton;Shigellosis;Tight junction;Vibrio cholerae infection;Viral myocarditis	3D-structure;Acetylation;ATP-binding;Completeproteome;Cytoplasm;Cytoskeleton;Deafness;Directproteinsequencing;Diseasemutation;Dystonia;Mentalretardation;Methylation;Nucleotide-binding;Oxidation;Polymorphism;Proteomicsidentification;Referenceproteome;Ublconjugation	GO:0001894;GO:0001895;GO:0002376;GO:0006325;GO:0006338;GO:0006457;GO:0006458;GO:0006928;GO:0006935;GO:0006950;GO:0006952;GO:0006955;GO:0006996;GO:0007155;GO:0007165;GO:0007166;GO:0007167;GO:0007169;GO:0007264;GO:0007411;GO:0007596;GO:0007599;GO:0008152;GO:0009605;GO:0009987;GO:0010033;GO:0016043;GO:0016337;GO:0016568;GO:0019538;GO:0021762;GO:0022607;GO:0022610;GO:0032501;GO:0032502;GO:0034109;GO:…	GO:0000166;GO:0005198;GO:0005200;GO:0005488;GO:0005515;GO:0005524;GO:0008092;GO:0008134;GO:0017076;GO:0019894;GO:0019899;GO:0030554;GO:0030957;GO:0032553;GO:0032555;GO:0032559;GO:0035639;GO:0042802;GO:0050998	GO:0000123;GO:0000785;GO:0000790;GO:0005615;GO:0005654;GO:0005737;GO:0005829;GO:0005856;GO:0005886;GO:0005912;GO:0005924;GO:0005925;GO:0014069;GO:0016020;GO:0030054;GO:0030055;GO:0030424;GO:0030529;GO:0030863;GO:0031982;GO:0031988;GO:0032991;GO:0034708;GO:0035097;GO:0035267;GO:0042995;GO:0043005;GO:0043189;GO:0043226;GO:0043227;GO:0043228;GO:0043229;GO:0043230;GO:0043232;GO:0043234;GO:0044421;GO:…	14	1	1	557	45	45	41736	0	89582	33507000	20	2	0	141531
111290	115030	0	0	0	0	0	0	65361	0	0	0	0	0	0	35421	0	0	0	219330	0	0	61656	0	0				apoptosis;biological regulation;biosynthetic process;cell cycle;cell cycle process;cell death;cellular biosynthetic process;cellular component organization;cellular component organization at cellular level;cellular component organization or biogenesis;cellular component organization or biogenesis at cellular level;cellular macromolecule metabolic process;cellular metabolic process;cellular nitrog…	binding;enzyme binding;enzyme inhibitor activity;enzyme regulator activity;insulin-like growth factor receptor binding;kinase binding;kinase inhibitor activity;kinase regulator activity;protein binding;protein kinase binding;protein kinase C binding;protein kinase C inhibitor activity;protein kinase inhibitor activity;protein kinase regulator activity;protein serine/threonine kinase inhibitor act…	adherens junction;anchoring junction;cell junction;cell part;cell-substrate adherens junction;cell-substrate junction;cytoplasmic part;cytoplasmic vesicle membrane;cytoplasmic vesicle part;cytosol;extracellular membrane-bounded organelle;extracellular organelle;extracellular region part;extracellular vesicular exosome;focal adhesion;intracellular organelle part;intracellular part;membrane;membran…	Cell cycle;Neurotrophin signaling pathway;Oocyte meiosis	3D-structure;Acetylation;Completeproteome;Cytoplasm;Directproteinsequencing;Phosphoprotein;Referenceproteome	GO:0000086;GO:0000278;GO:0001932;GO:0006139;GO:0006352;GO:0006367;GO:0006469;GO:0006605;GO:0006807;GO:0006810;GO:0006886;GO:0006915;GO:0006996;GO:0007049;GO:0007165;GO:0007264;GO:0008152;GO:0008219;GO:0009058;GO:0009966;GO:0009987;GO:0010467;GO:0010646;GO:0012501;GO:0015031;GO:0016043;GO:0016070;GO:0016265;GO:0019220;GO:0019222;GO:0022402;GO:0023051;GO:0031323;GO:0031399;GO:0031644;GO:0032268;GO:…	GO:0004857;GO:0004860;GO:0005080;GO:0005102;GO:0005159;GO:0005488;GO:0005515;GO:0008426;GO:0019207;GO:0019210;GO:0019887;GO:0019899;GO:0019900;GO:0019901;GO:0030234;GO:0030291	GO:0005829;GO:0005912;GO:0005924;GO:0005925;GO:0012506;GO:0016020;GO:0030054;GO:0030055;GO:0030659;GO:0031090;GO:0031982;GO:0031988;GO:0043226;GO:0043227;GO:0043230;GO:0044421;GO:0044422;GO:0044424;GO:0044433;GO:0044444;GO:0044446;GO:0044464;GO:0065010;GO:0070062;GO:0070161	3	2	2	138	97	97	28302	0	19578	64896000	16	5	55227	295382
439700	516840	652220	0	0	0	53154	49112	72083	48018	0	0	0	0	79026	0	0	0	0	0	0	59823	0	0	0				anatomical structure development;apoptosis;biological regulation;biosynthetic process;cell cycle;cell cycle process;cell death;cell migration;cell motility;cell surface receptor linked signaling pathway;cellular biosynthetic process;cellular chemical homeostasis;cellular component movement;cellular component organization;cellular component organization at cellular level;cellular component organiz…	amine binding;amino acid binding;antigen binding;binding;carboxylic acid binding;channel regulator activity;enzyme binding;histone deacetylase binding;ion channel binding;MHC class II protein complex binding;MHC protein complex binding;phosphoprotein binding;phosphoserine binding;potassium channel regulator activity;protein binding;protein dimerization activity;protein heterodimerization activity…	adherens junction;anchoring junction;axon;cell junction;cell part;cell projection;cell-substrate adherens junction;cell-substrate junction;cytoplasmic membrane-bounded vesicle;cytoplasmic part;cytoplasmic vesicle;cytoplasmic vesicle membrane;cytoplasmic vesicle part;cytoskeletal part;cytosol;extracellular membrane-bounded organelle;extracellular organelle;extracellular region part;extracellular v…	Cell cycle;Neurotrophin signaling pathway;Oocyte meiosis	3D-structure;Acetylation;Alternativesplicing;Completeproteome;Cytoplasm;Directproteinsequencing;Host-virusinteraction;Phosphoprotein;Proteomicsidentification;Referenceproteome	GO:0000086;GO:0000278;GO:0001764;GO:0002027;GO:0003062;GO:0003064;GO:0006139;GO:0006352;GO:0006367;GO:0006605;GO:0006807;GO:0006810;GO:0006873;GO:0006886;GO:0006915;GO:0006928;GO:0006950;GO:0006996;GO:0007049;GO:0007165;GO:0007166;GO:0007167;GO:0007169;GO:0007264;GO:0008016;GO:0008152;GO:0008219;GO:0009058;GO:0009266;GO:0009408;GO:0009628;GO:0009987;GO:0010467;GO:0012501;GO:0015031;GO:0016032;GO:…	GO:0003823;GO:0005488;GO:0005515;GO:0015459;GO:0016247;GO:0016597;GO:0019899;GO:0023023;GO:0023026;GO:0031406;GO:0031625;GO:0042826;GO:0043176;GO:0044325;GO:0045309;GO:0046982;GO:0046983;GO:0050815;GO:0051219	GO:0005739;GO:0005829;GO:0005871;GO:0005875;GO:0005912;GO:0005924;GO:0005925;GO:0012506;GO:0016020;GO:0016023;GO:0030054;GO:0030055;GO:0030424;GO:0030659;GO:0031090;GO:0031410;GO:0031982;GO:0031988;GO:0032991;GO:0042470;GO:0042995;GO:0043005;GO:0043226;GO:0043227;GO:0043229;GO:0043230;GO:0043231;GO:0043234;GO:0044421;GO:0044422;GO:0044424;GO:0044430;GO:0044433;GO:0044444;GO:0044446;GO:0044464;GO:…	4	3	3	176	137	137	29174	0	21685	101620000	17	7	286970	415987
0	611600	55583	0	0	0	0	60946	45741	64972	0	0	293880	449750	431030	561980	0	0	0	0	513290	0	0	0	0				actin cytoskeleton organization;actin filament organization;actin filament-based movement;actin filament-based process;actin-mediated cell contraction;actin-myosin filament sliding;actomyosin structure organization;anatomical structure development;anatomical structure formation involved in morphogenesis;anatomical structure morphogenesis;apoptosis;biological regulation;cardiac muscle contraction;…	adenyl nucleotide binding;adenyl ribonucleotide binding;ADP binding;ATP binding;ATPase activity;binding;catalytic activity;cytoskeletal protein binding;enzyme binding;hydrolase activity;hydrolase activity, acting on acid anhydrides;hydrolase activity, acting on acid anhydrides, in phosphorus-containing anhydrides;kinase binding;myosin binding;nucleoside-triphosphatase activity;nucleotide binding;…	actin cytoskeleton;actin filament;actin filament bundle;actomyosin;actomyosin, actin part;adherens junction;anchoring junction;blood microparticle;cell junction;cell part;cell periphery;cell-substrate adherens junction;cell-substrate junction;contractile fiber;contractile fiber part;cytoplasm;cytoplasmic part;cytoskeletal part;cytoskeleton;cytosol;extracellular membrane-bounded organelle;extracel…	Cardiac muscle contraction;Dilated cardiomyopathy;Hypertrophic cardiomyopathy (HCM);Vascular smooth muscle contraction	3D-structure;Acetylation;Alternativesplicing;Aorticaneurysm;ATP-binding;Atrialseptaldefect;Cardiomyopathy;Completeproteome;Cytoplasm;Cytoskeleton;Diseasemutation;Methylation;Muscleprotein;Nemalinemyopathy;Nucleotide-binding;Oxidation;Polymorphism;Proteomicsidentification;Referenceproteome	GO:0003008;GO:0003012;GO:0003013;GO:0003015;GO:0003018;GO:0006915;GO:0006928;GO:0006936;GO:0006939;GO:0006941;GO:0006996;GO:0007010;GO:0007015;GO:0008152;GO:0008217;GO:0008219;GO:0009605;GO:0009607;GO:0009612;GO:0009615;GO:0009628;GO:0009653;GO:0009719;GO:0009725;GO:0009987;GO:0009991;GO:0010033;GO:0010035;GO:0010038;GO:0010226;GO:0010927;GO:0010941;GO:0012501;GO:0014829;GO:0014888;GO:0016043;GO:…	GO:0000166;GO:0003824;GO:0005198;GO:0005200;GO:0005488;GO:0005515;GO:0005524;GO:0008092;GO:0016462;GO:0016787;GO:0016817;GO:0016818;GO:0016887;GO:0017022;GO:0017076;GO:0017111;GO:0017166;GO:0019899;GO:0019900;GO:0019901;GO:0030554;GO:0032553;GO:0032555;GO:0032559;GO:0035639;GO:0043531	GO:0001725;GO:0005615;GO:0005737;GO:0005829;GO:0005856;GO:0005865;GO:0005884;GO:0005886;GO:0005912;GO:0005924;GO:0005925;GO:0015629;GO:0016020;GO:0030017;GO:0030054;GO:0030055;GO:0030485;GO:0031674;GO:0031982;GO:0031988;GO:0032432;GO:0032991;GO:0042383;GO:0042641;GO:0042643;GO:0043226;GO:0043227;GO:0043228;GO:0043229;GO:0043230;GO:0043232;GO:0043234;GO:0043292;GO:0044421;GO:0044422;GO:0044424;GO:…	8	1	1	247	43	43	41876	0	10785	181800000	18	2	228602	935718
6822900	4770900	4582700	439380	1837700	999520	1803600	1476200	642790	457410	1543700	765300	1560700	1523500	2945700	1520900	1477800	2287700	1943100	1637200	1523000	2845500	1428400	2562200	2724700				anatomical structure homeostasis;ATP-dependent chromatin remodeling;biological regulation;cell cycle;cellular component assembly;cellular component assembly at cellular level;cellular component organization;cellular component organization at cellular level;cellular component organization or biogenesis;cellular component organization or biogenesis at cellular level;cellular macromolecular complex …	binding;catalytic activity;demethylase activity;DNA binding;histone binding;histone demethylase activity;histone demethylase activity (H4-K20 specific);nucleic acid binding;protein binding	cell part;chromosomal part;chromosome;extracellular membrane-bounded organelle;extracellular organelle;extracellular region;extracellular region part;extracellular vesicular exosome;intracellular membrane-bounded organelle;intracellular non-membrane-bounded organelle;intracellular organelle;intracellular organelle part;intracellular part;macromolecular complex;membrane;membrane-bounded organelle;…	Systemic lupus erythematosus	3D-structure;Acetylation;Chromosomalrearrangement;Chromosome;Citrullination;Completeproteome;Directproteinsequencing;DNA-binding;Isopeptidebond;Methylation;Nucleosomecore;Nucleus;Phosphoprotein;Polymorphism;Referenceproteome;Ublconjugation	GO:0000183;GO:0000278;GO:0000723;GO:0002682;GO:0006139;GO:0006259;GO:0006304;GO:0006305;GO:0006306;GO:0006325;GO:0006333;GO:0006334;GO:0006335;GO:0006336;GO:0006338;GO:0006342;GO:0006355;GO:0006461;GO:0006464;GO:0006482;GO:0006730;GO:0006807;GO:0006996;GO:0007049;GO:0007165;GO:0007264;GO:0008152;GO:0008214;GO:0009889;GO:0009890;GO:0009892;GO:0009987;GO:0010467;GO:0010468;GO:0010556;GO:0010558;GO:…	GO:0003676;GO:0003677;GO:0003824;GO:0005488;GO:0005515;GO:0032451;GO:0032452;GO:0035575;GO:0042393	GO:0000228;GO:0000786;GO:0005576;GO:0005634;GO:0005654;GO:0005694;GO:0016020;GO:0031982;GO:0031988;GO:0032991;GO:0032993;GO:0043226;GO:0043227;GO:0043228;GO:0043229;GO:0043230;GO:0043231;GO:0043232;GO:0043234;GO:0044421;GO:0044422;GO:0044424;GO:0044427;GO:0044428;GO:0044446;GO:0044464;GO:0065010;GO:0070062	5	5	5	505	505	505	11367	0	34339	1132400000	6	53	2.36598e+06	3.99741e+06
572250	625370	399960	345860	641260	446460	1098600	193680	202320	0	309540	0	0	0	0	198850	0	275070	185340	0	0	0	0	81473	197040				activation of adenylate cyclase activity;activation of adenylate cyclase activity by dopamine receptor signaling pathway;activation of adenylate cyclase activity by G-protein signaling pathway;activation of phospholipase C activity;activation of phospholipase C activity by G-protein coupled receptor protein signaling pathway coupled to IP3 second messenger;anatomical structure development;apoptos…	binding;calcium channel regulator activity;catalytic activity;channel regulator activity;enzyme binding;GTPase activity;GTPase binding;hydrolase activity;hydrolase activity, acting on acid anhydrides;hydrolase activity, acting on acid anhydrides, in phosphorus-containing anhydrides;molecular transducer activity;nucleoside-triphosphatase activity;protein binding;protein complex binding;pyrophospha…	adherens junction;anchoring junction;cell body;cell junction;cell part;cell projection;cell projection part;cell-substrate adherens junction;cell-substrate junction;cilium part;cytoplasmic part;dendrite;extracellular membrane-bounded organelle;extracellular organelle;extracellular region part;extracellular space;extracellular vesicular exosome;extrinsic to internal side of plasma membrane;extrins…	Chemokine signaling pathway;Phototransduction;Taste transduction	3D-structure;Acetylation;Alternativesplicing;Charcot-Marie-Toothdisease;Completeproteome;Cytoplasm;Directproteinsequencing;Diseasemutation;Neurodegeneration;Neuropathy;Phosphoprotein;Proteomicsidentification;Referenceproteome;Repeat;Transducer;WDrepeat	GO:0001666;GO:0001775;GO:0003008;GO:0006091;GO:0006112;GO:0006140;GO:0006873;GO:0006874;GO:0006875;GO:0006915;GO:0006950;GO:0007154;GO:0007165;GO:0007166;GO:0007186;GO:0007187;GO:0007188;GO:0007189;GO:0007190;GO:0007191;GO:0007200;GO:0007202;GO:0007204;GO:0007212;GO:0007213;GO:0007264;GO:0007265;GO:0007267;GO:0007268;GO:0007596;GO:0007599;GO:0007600;GO:0007602;GO:0007603;GO:0007606;GO:0008152;GO:…	GO:0003824;GO:0003924;GO:0004871;GO:0005246;GO:0005488;GO:0005515;GO:0016247;GO:0016462;GO:0016787;GO:0016817;GO:0016818;GO:0017111;GO:0019899;GO:0032403;GO:0051020;GO:0060089	GO:0001917;GO:0005615;GO:0005622;GO:0005765;GO:0005774;GO:0005834;GO:0005886;GO:0005912;GO:0005924;GO:0005925;GO:0016020;GO:0019897;GO:0019898;GO:0030054;GO:0030055;GO:0030425;GO:0031090;GO:0031234;GO:0031982;GO:0031988;GO:0032991;GO:0042622;GO:0042995;GO:0043005;GO:0043226;GO:0043227;GO:0043230;GO:0043234;GO:0044297;GO:0044421;GO:0044422;GO:0044424;GO:0044425;GO:0044437;GO:0044441;GO:0044444;GO:…	3	3	3	97	97	97	37377	0	18687	130170000	13	12	251393	316591
25773	639860	755150	162430	0	0	0	323410	178150	129650	0	0	0	310290	92802	0	0	0	0	0	140040	354810	180470	259130	221030				biological regulation;biosynthetic process;blood coagulation;cell activation;cell migration;cell motility;cellular biosynthetic process;cellular component assembly;cellular component assembly at cellular level;cellular component movement;cellular component organization;cellular component organization at cellular level;cellular component organization or biogenesis;cellular component organization o…	binding;catalytic activity;cis-trans isomerase activity;isomerase activity;peptide binding;peptidyl-prolyl cis-trans isomerase activity;protein binding;unfolded protein binding;virion binding	adherens junction;anchoring junction;cell junction;cell part;cell-substrate adherens junction;cell-substrate junction;cytoplasmic part;cytosol;extracellular membrane-bounded organelle;extracellular organelle;extracellular region;extracellular region part;extracellular space;extracellular vesicular exosome;focal adhesion;intracellular membrane-bounded organelle;intracellular organelle;intracellula…		3D-structure;Acetylation;Alternativesplicing;Completeproteome;Cyclosporin;Cytoplasm;Directproteinsequencing;Glycoprotein;Host-virusinteraction;Isomerase;Isopeptidebond;Phosphoprotein;Proteomicsidentification;Referenceproteome;Rotamase;Secreted;Ublconjugation	GO:0000413;GO:0001775;GO:0002376;GO:0002576;GO:0006139;GO:0006259;GO:0006260;GO:0006278;GO:0006457;GO:0006464;GO:0006807;GO:0006810;GO:0006887;GO:0006928;GO:0006996;GO:0007596;GO:0007599;GO:0008152;GO:0009058;GO:0009059;GO:0009987;GO:0016032;GO:0016043;GO:0016192;GO:0016477;GO:0018193;GO:0018208;GO:0019058;GO:0019061;GO:0019068;GO:0019076;GO:0019538;GO:0022414;GO:0022415;GO:0022607;GO:0030168;GO:…	GO:0003755;GO:0003824;GO:0005488;GO:0005515;GO:0016853;GO:0016859;GO:0042277;GO:0046790;GO:0051082	GO:0005576;GO:0005615;GO:0005634;GO:0005829;GO:0005912;GO:0005924;GO:0005925;GO:0016020;GO:0030054;GO:0030055;GO:0031982;GO:0031988;GO:0043226;GO:0043227;GO:0043229;GO:0043230;GO:0043231;GO:0044421;GO:0044424;GO:0044444;GO:0044464;GO:0065010;GO:0070062;GO:0070161	3	3	3	206	206	206	18012	0	21294	129210000	10	10	328796	894090
4389300	3305900	4413900	1084500	1453500	891060	1115100	278830	708700	424600	319870	329960	343130	2304300	2210200	1780400	1431700	1395800	576770	2489500	910080	1911800	1677300	1108600	1894500				cell division;cellular component assembly;cellular component assembly at cellular level;cellular component organization;cellular component organization at cellular level;cellular component organization or biogenesis;cellular component organization or biogenesis at cellular level;cellular macromolecular complex assembly;cellular macromolecular complex subunit organization;cellular macromolecule me…	binding;catalytic activity;double-stranded RNA binding;enzyme binding;GTP binding;GTPase activity;guanyl nucleotide binding;guanyl ribonucleotide binding;hydrolase activity;hydrolase activity, acting on acid anhydrides;hydrolase activity, acting on acid anhydrides, in phosphorus-containing anhydrides;nucleic acid binding;nucleoside-triphosphatase activity;nucleotide binding;protein binding;purine…	cell part;cytoplasmic microtubule;cytoplasmic part;cytoskeletal part;extracellular membrane-bounded organelle;extracellular organelle;extracellular region part;extracellular vesicular exosome;intracellular organelle part;intracellular part;macromolecular complex;membrane-bounded organelle;membrane-bounded vesicle;microtubule;organelle;organelle part;protein complex;vesicle	Gap junction;Pathogenic Escherichia coli infection;Phagosome	3D-structure;Acetylation;Alternativesplicing;Completeproteome;Cytoplasm;Cytoskeleton;Directproteinsequencing;GTP-binding;Isopeptidebond;Methylation;Microtubule;Nitration;Nucleotide-binding;Phosphoprotein;Referenceproteome;Ublconjugation	GO:0000226;GO:0006457;GO:0006458;GO:0006461;GO:0006810;GO:0006996;GO:0007010;GO:0007017;GO:0008152;GO:0009987;GO:0010033;GO:0016043;GO:0019538;GO:0022607;GO:0030705;GO:0034097;GO:0034621;GO:0034622;GO:0042221;GO:0043170;GO:0043623;GO:0043933;GO:0044237;GO:0044238;GO:0044260;GO:0044267;GO:0046907;GO:0050896;GO:0051084;GO:0051234;GO:0051258;GO:0051301;GO:0051649;GO:0051716;GO:0065003;GO:0070670;GO:…	GO:0000166;GO:0003676;GO:0003723;GO:0003725;GO:0003824;GO:0003924;GO:0005198;GO:0005200;GO:0005488;GO:0005515;GO:0005525;GO:0016462;GO:0016787;GO:0016817;GO:0016818;GO:0017076;GO:0017111;GO:0019001;GO:0019899;GO:0031625;GO:0032553;GO:0032555;GO:0032561;GO:0035639	GO:0005874;GO:0005881;GO:0031982;GO:0031988;GO:0032991;GO:0043226;GO:0043227;GO:0043230;GO:0043234;GO:0044421;GO:0044422;GO:0044424;GO:0044430;GO:0044444;GO:0044446;GO:0044464;GO:0065010;GO:0070062	12	12	0	355	355	0	50151	0	15637	2780900000	21	76	1.6013e+06	4.14036e+06
523230	514600	585440	23298	0	80344	72485	80460	85326	121290	0	0	0	164930	116770	261150	82215	269640	87031	96227	112830	94755	96532	252320	105340				biological regulation;blood coagulation;cell activation;cell cycle;cell cycle process;cellular component assembly;cellular component assembly at cellular level;cellular component organization;cellular component organization at cellular level;cellular component organization or biogenesis;cellular component organization or biogenesis at cellular level;cellular macromolecular complex assembly;cellul…	binding;catalytic activity;GTP binding;GTPase activity;guanyl nucleotide binding;guanyl ribonucleotide binding;hydrolase activity;hydrolase activity, acting on acid anhydrides;hydrolase activity, acting on acid anhydrides, in phosphorus-containing anhydrides;nucleoside-triphosphatase activity;nucleotide binding;purine nucleotide binding;purine ribonucleoside triphosphate binding;purine ribonucleo…	cell part;cytoplasmic part;cytoskeletal part;cytosol;extracellular membrane-bounded organelle;extracellular organelle;extracellular region;extracellular region part;extracellular vesicular exosome;intracellular organelle part;intracellular part;macromolecular complex;membrane-bounded organelle;membrane-bounded vesicle;microtubule;organelle;organelle part;protein complex;vesicle	Gap junction;Pathogenic Escherichia coli infection;Phagosome	Acetylation;Alternativesplicing;Amyotrophiclateralsclerosis;Completeproteome;Cytoplasm;Cytoskeleton;Directproteinsequencing;GTP-binding;Microtubule;Neurodegeneration;Nitration;Nucleotide-binding;Phosphoprotein;Referenceproteome	GO:0000086;GO:0000278;GO:0001775;GO:0002576;GO:0006457;GO:0006458;GO:0006461;GO:0006810;GO:0006887;GO:0006996;GO:0007017;GO:0007049;GO:0007596;GO:0007599;GO:0008152;GO:0009987;GO:0016043;GO:0016192;GO:0019538;GO:0022402;GO:0022607;GO:0030168;GO:0032501;GO:0032940;GO:0034621;GO:0034622;GO:0043170;GO:0043623;GO:0043933;GO:0044237;GO:0044238;GO:0044260;GO:0044267;GO:0046903;GO:0050817;GO:0050878;GO:…	GO:0000166;GO:0003824;GO:0003924;GO:0005198;GO:0005200;GO:0005488;GO:0005525;GO:0016462;GO:0016787;GO:0016817;GO:0016818;GO:0017076;GO:0017111;GO:0019001;GO:0032553;GO:0032555;GO:0032561;GO:0035639	GO:0005576;GO:0005829;GO:0005874;GO:0031982;GO:0031988;GO:0032991;GO:0043226;GO:0043227;GO:0043230;GO:0043234;GO:0044421;GO:0044422;GO:0044424;GO:0044430;GO:0044444;GO:0044446;GO:0044464;GO:0065010;GO:0070062	11	3	3	312	76	76	49924	0	19914	186850000	21	11	268026	414564
3535000	2547700	3158100	423920	432640	703190	503030	1062100	111430	1164700	72218	117820	134160	1712700	2130800	1652700	89509	590740	956020	1851300	2861400	2393200	1299600	1573400	1451000				biological regulation;cell cycle;cell cycle process;cell killing;cellular component assembly;cellular component assembly at cellular level;cellular component movement;cellular component organization;cellular component organization at cellular level;cellular component organization or biogenesis;cellular component organization or biogenesis at cellular level;cellular macromolecular complex assembly…	binding;catalytic activity;double-stranded RNA binding;GTP binding;GTPase activity;guanyl nucleotide binding;guanyl ribonucleotide binding;hydrolase activity;hydrolase activity, acting on acid anhydrides;hydrolase activity, acting on acid anhydrides, in phosphorus-containing anhydrides;MHC class I protein binding;MHC protein binding;nucleic acid binding;nucleoside-triphosphatase activity;nucleoti…	cell part;cytoplasmic part;cytoskeletal part;cytoskeleton;cytosol;extracellular membrane-bounded organelle;extracellular organelle;extracellular region part;extracellular vesicular exosome;intracellular membrane-bounded organelle;intracellular non-membrane-bounded organelle;intracellular organelle;intracellular organelle part;intracellular part;macromolecular complex;membrane-bounded organelle;me…	Gap junction;Pathogenic Escherichia coli infection;Phagosome	Acetylation;Completeproteome;Cytoplasm;Cytoskeleton;GTP-binding;Microtubule;Nucleotide-binding;Phosphoprotein;Referenceproteome	GO:0000086;GO:0000226;GO:0000278;GO:0001906;GO:0001909;GO:0002228;GO:0002252;GO:0002376;GO:0002443;GO:0002449;GO:0006457;GO:0006458;GO:0006461;GO:0006917;GO:0006928;GO:0006950;GO:0006952;GO:0006955;GO:0006996;GO:0007010;GO:0007017;GO:0007049;GO:0007051;GO:0008152;GO:0009987;GO:0010941;GO:0010942;GO:0012502;GO:0016043;GO:0019538;GO:0022402;GO:0022607;GO:0034621;GO:0034622;GO:0042267;GO:0042981;GO:…	GO:0000166;GO:0003676;GO:0003723;GO:0003725;GO:0003824;GO:0003924;GO:0005102;GO:0005198;GO:0005200;GO:0005488;GO:0005515;GO:0005525;GO:0016462;GO:0016787;GO:0016817;GO:0016818;GO:0017076;GO:0017111;GO:0019001;GO:0032553;GO:0032555;GO:0032561;GO:0035639;GO:0042287;GO:0042288;GO:0051082	GO:0005634;GO:0005829;GO:0005856;GO:0005874;GO:0031982;GO:0031988;GO:0032991;GO:0043226;GO:0043227;GO:0043228;GO:0043229;GO:0043230;GO:0043231;GO:0043232;GO:0043234;GO:0044421;GO:0044422;GO:0044424;GO:0044430;GO:0044444;GO:0044446;GO:0044464;GO:0065010;GO:0070062	17	17	1	53	53	27	4983	0	32331	2917800000	19	121	1.40369e+06	3.17344e+06
29483000	24798000	24087000	6312600	10342000	10747000	12154000	18888000	17040000	9360300	10028000	2421100	11245000	20508000	20988000	20061000	10173000	11708000	14050000	22385000	19764000	23247000	24694000	25699000	18555000				anion transport;bicarbonate transport;biological adhesion;biological regulation;blood coagulation;catabolic process;cell adhesion;cell-cell adhesion;cellular catabolic process;cellular component assembly;cellular component organization;cellular component organization or biogenesis;cellular membrane organization;cellular metabolic process;cellular process;cellular response to chemical stimulus;cel…	binding;cation binding;heme binding;hemoglobin binding;ion binding;iron ion binding;metal ion binding;oxygen binding;oxygen transporter activity;protein binding;substrate-specific transporter activity;tetrapyrrole binding;transition metal ion binding;transporter activity	blood microparticle;cell part;cytoplasmic membrane-bounded vesicle lumen;cytoplasmic part;cytoplasmic vesicle part;cytosol;cytosolic part;endocytic vesicle lumen;extracellular membrane-bounded organelle;extracellular organelle;extracellular region;extracellular region part;extracellular vesicular exosome;haptoglobin-hemoglobin complex;hemoglobin complex;intracellular organelle part;intracellular …	African trypanosomiasis;Malaria	3D-structure;Acetylation;Completeproteome;Congenitaldyserythropoieticanemia;Directproteinsequencing;Diseasemutation;Glycation;Glycoprotein;Heme;Hereditaryhemolyticanemia;Hypotensiveagent;Iron;Metal-binding;Oxygentransport;Phosphoprotein;Polymorphism;Proteomicsidentification;Pyruvate;Referenceproteome;S-nitrosylation;Transport;Vasoactive	GO:0000302;GO:0003008;GO:0003013;GO:0003014;GO:0003018;GO:0006461;GO:0006810;GO:0006811;GO:0006820;GO:0006897;GO:0006898;GO:0006950;GO:0006979;GO:0007155;GO:0007596;GO:0007599;GO:0008152;GO:0008217;GO:0009056;GO:0009889;GO:0009891;GO:0009893;GO:0009987;GO:0010035;GO:0010324;GO:0010941;GO:0010942;GO:0015669;GO:0015671;GO:0015698;GO:0015701;GO:0015711;GO:0016043;GO:0016044;GO:0016192;GO:0016337;GO:…	GO:0005215;GO:0005344;GO:0005488;GO:0005506;GO:0005515;GO:0019825;GO:0020037;GO:0022892;GO:0030492;GO:0043167;GO:0043169;GO:0046872;GO:0046906;GO:0046914	GO:0005576;GO:0005829;GO:0005833;GO:0031838;GO:0031974;GO:0031982;GO:0031983;GO:0031988;GO:0032991;GO:0043226;GO:0043227;GO:0043230;GO:0043233;GO:0043234;GO:0044421;GO:0044422;GO:0044424;GO:0044433;GO:0044444;GO:0044445;GO:0044446;GO:0044464;GO:0060205;GO:0065010;GO:0070062;GO:0071682;GO:0072562	10	10	10	857	857	857	15998	0	11731	8838100000	11	159	9.0169e+06	2.24456e+06
10851000	5675300	8975600	3720800	7724100	6954200	27870000	3061500	3794400	3066600	367990	2723800	1508100	663530	2713800	2024900	3317900	4408500	2528000	3219900	1701400	2709900	2104700	3700300	2607600				anion transport;bicarbonate transport;biological regulation;catabolic process;cellular catabolic process;cellular component assembly;cellular component organization;cellular component organization or biogenesis;cellular membrane organization;cellular metabolic process;cellular process;cellular response to chemical stimulus;cellular response to hydrogen peroxide;cellular response to oxidative stre…	binding;cation binding;heme binding;ion binding;iron ion binding;metal ion binding;oxygen binding;oxygen transporter activity;substrate-specific transporter activity;tetrapyrrole binding;transition metal ion binding;transporter activity	blood microparticle;cell part;cytoplasmic membrane-bounded vesicle lumen;cytoplasmic part;cytoplasmic vesicle part;cytosol;cytosolic part;cytosolic small ribosomal subunit;endocytic vesicle lumen;extracellular membrane-bounded organelle;extracellular organelle;extracellular region;extracellular region part;extracellular vesicular exosome;haptoglobin-hemoglobin complex;hemoglobin complex;intracell…	African trypanosomiasis;Malaria	3D-structure;Acetylation;Completeproteome;Directproteinsequencing;Diseasemutation;Glycation;Glycoprotein;Heme;Hereditaryhemolyticanemia;Iron;Metal-binding;Oxygentransport;Phosphoprotein;Polymorphism;Proteomicsidentification;Referenceproteome;Transport	GO:0000302;GO:0006461;GO:0006810;GO:0006811;GO:0006820;GO:0006897;GO:0006898;GO:0006950;GO:0006979;GO:0008152;GO:0009056;GO:0009987;GO:0010035;GO:0010324;GO:0010941;GO:0010942;GO:0015669;GO:0015671;GO:0015698;GO:0015701;GO:0015711;GO:0016043;GO:0016044;GO:0016192;GO:0022607;GO:0033554;GO:0034599;GO:0034614;GO:0042221;GO:0042542;GO:0042743;GO:0042744;GO:0043933;GO:0044237;GO:0044248;GO:0044281;GO:…	GO:0005215;GO:0005344;GO:0005488;GO:0005506;GO:0019825;GO:0020037;GO:0022892;GO:0043167;GO:0043169;GO:0046872;GO:0046906;GO:0046914	GO:0005576;GO:0005829;GO:0005833;GO:0015935;GO:0016020;GO:0022627;GO:0030529;GO:0031838;GO:0031974;GO:0031982;GO:0031983;GO:0031988;GO:0032991;GO:0043226;GO:0043227;GO:0043230;GO:0043233;GO:0043234;GO:0044421;GO:0044422;GO:0044424;GO:0044433;GO:0044444;GO:0044445;GO:0044446;GO:0044464;GO:0060205;GO:0065010;GO:0070062;GO:0071682;GO:0072562	6	6	4	521	521	394	15257	0	17031	5728300000	8	143	8.09579e+06	1.43602e+06
25459000	21437000	25054000	24988000	38735000	25143000	41126000	17680000	14977000	5978000	10636000	12868000	18629000	8815100	9937400	8727400	15372000	14593000	14630000	14902000	13476000	12134000	15039000	15434000	17293000				biological adhesion;biological regulation;cell adhesion;cellular component organization;cellular component organization or biogenesis;cellular defense response;cellular membrane organization;cellular process;cellular response to stimulus;defense response;endocytosis;establishment of localization;membrane invagination;membrane organization;receptor-mediated endocytosis;regulation of biological pro…	cargo receptor activity;receptor activity;scavenger receptor activity	blood microparticle;cell part;extracellular matrix;extracellular membrane-bounded organelle;extracellular organelle;extracellular region part;extracellular space;extracellular vesicular exosome;membrane;membrane-bounded organelle;membrane-bounded vesicle;organelle;proteinaceous extracellular matrix;vesicle		3D-structure;Celladhesion;Completeproteome;Directproteinsequencing;Disulfidebond;Extracellularmatrix;Glycoprotein;Referenceproteome;Secreted;Signal	GO:0006810;GO:0006897;GO:0006898;GO:0006950;GO:0006952;GO:0006968;GO:0007155;GO:0007165;GO:0009987;GO:0010324;GO:0016043;GO:0016044;GO:0016192;GO:0022610;GO:0050789;GO:0050794;GO:0050896;GO:0051234;GO:0051716;GO:0061024;GO:0065007;GO:0071840	GO:0004872;GO:0005044;GO:0038024	GO:0005578;GO:0005615;GO:0016020;GO:0031012;GO:0031982;GO:0031988;GO:0043226;GO:0043227;GO:0043230;GO:0044421;GO:0044464;GO:0065010;GO:0070062;GO:0072562	15	15	15	274	274	274	6533	0	1927	21315000000	26	339	7.72368e+06	4.94663e+06
844100	706780	757300	310720	1097900	1112000	936610	66073000	71585000	81952000	63232000	55614000	83850000	85391000	86293000	78219000	72539000	59645000	58117000	30300000	10686000	32448000	15343000	13981000	37507000				acylglycerol metabolic process;alcohol metabolic process;cellular lipid metabolic process;cellular metabolic process;cellular process;cholesterol efflux;cholesterol metabolic process;cholesterol transport;establishment of localization;glycerol ether metabolic process;glycerolipid metabolic process;lipid metabolic process;lipid transport;metabolic process;neutral lipid metabolic process;organic et…	binding;cholesterol binding;lipid binding;lipid transporter activity;protein binding;receptor binding;steroid binding;sterol binding;substrate-specific transporter activity;transporter activity	extracellular region;extracellular region part;high-density lipoprotein particle;low-density lipoprotein particle;macromolecular complex;plasma lipoprotein particle;protein-lipid complex		Cholesterolmetabolism;Completeproteome;Directproteinsequencing;Glycoprotein;HDL;LDL;Lipidmetabolism;Lipidtransport;Phosphoprotein;Polymorphism;Referenceproteome;Secreted;Signal;Steroidmetabolism;Sterolmetabolism;Transport	GO:0006066;GO:0006629;GO:0006638;GO:0006639;GO:0006641;GO:0006662;GO:0006810;GO:0006869;GO:0008152;GO:0008202;GO:0008203;GO:0009987;GO:0015918;GO:0016125;GO:0018904;GO:0030301;GO:0033344;GO:0044237;GO:0044238;GO:0044255;GO:0044281;GO:0046486;GO:0051234;GO:0071702	GO:0005102;GO:0005215;GO:0005319;GO:0005488;GO:0005496;GO:0005515;GO:0008289;GO:0015485;GO:0022892;GO:0032934	GO:0005576;GO:0032991;GO:0032994;GO:0034358;GO:0034362;GO:0034364;GO:0044421	4	4	4	23	23	23	35399	0	11142	26018000000	13	48	274680	1.55369e+07
823560	831650	791360	0	368230	345230	373260	535110	469540	0	360130	257850	295610	0	66388	0	547040	0	0	50710	0	0	523980	539410	564220				cell migration;cell motility;cellular component assembly;cellular component assembly at cellular level;cellular component movement;cellular component organization;cellular component organization at cellular level;cellular component organization or biogenesis;cellular component organization or biogenesis at cellular level;cellular macromolecular complex assembly;cellular macromolecular complex sub…	binding;catalytic activity;GTP binding;GTPase activity;guanyl nucleotide binding;guanyl ribonucleotide binding;hydrolase activity;hydrolase activity, acting on acid anhydrides;hydrolase activity, acting on acid anhydrides, in phosphorus-containing anhydrides;nucleoside-triphosphatase activity;nucleotide binding;purine nucleotide binding;purine ribonucleoside triphosphate binding;purine ribonucleo…	cell part;cytoplasm;cytoskeletal part;extracellular membrane-bounded organelle;extracellular organelle;extracellular region part;extracellular vesicular exosome;intracellular membrane-bounded organelle;intracellular organelle;intracellular organelle part;intracellular part;macromolecular complex;membrane-bounded organelle;membrane-bounded vesicle;microtubule;nucleus;organelle;organelle part;prote…	Gap junction;Pathogenic Escherichia coli infection;Phagosome	Acetylation;Completeproteome;Cytoplasm;Cytoskeleton;Directproteinsequencing;Diseasemutation;GTP-binding;Methylation;Microtubule;Nucleotide-binding;Phosphoprotein;Polymorphism;Referenceproteome	GO:0001764;GO:0006457;GO:0006458;GO:0006461;GO:0006928;GO:0007017;GO:0008152;GO:0009987;GO:0016043;GO:0016477;GO:0019538;GO:0022607;GO:0034621;GO:0034622;GO:0040011;GO:0043170;GO:0043623;GO:0043933;GO:0044237;GO:0044238;GO:0044260;GO:0044267;GO:0048870;GO:0051084;GO:0051258;GO:0065003;GO:0071822;GO:0071840;GO:0071841;GO:0071842;GO:0071844	GO:0000166;GO:0003824;GO:0003924;GO:0005198;GO:0005200;GO:0005488;GO:0005525;GO:0016462;GO:0016787;GO:0016817;GO:0016818;GO:0017076;GO:0017111;GO:0019001;GO:0032553;GO:0032555;GO:0032561;GO:0035639	GO:0005634;GO:0005737;GO:0005874;GO:0031982;GO:0031988;GO:0032991;GO:0043226;GO:0043227;GO:0043229;GO:0043230;GO:0043231;GO:0043234;GO:0044421;GO:0044422;GO:0044424;GO:0044430;GO:0044446;GO:0044464;GO:0065010;GO:0070062	15	3	1	458	88	27	49906	0	27112	372840000	19	12	318013	1.11948e+06
63323	136410	57724	431800	396040	269980	109900	310130	202210	85477	0	347130	632310	781330	604660	230940	547030	656260	629720	81570	101780	45148	204200	223310	240670				acute inflammatory response;acute-phase response;amine metabolic process;aminoglycan metabolic process;biological regulation;carbohydrate metabolic process;defense response;glycosaminoglycan metabolic process;hyaluronan metabolic process;inflammatory response;macromolecule metabolic process;metabolic process;negative regulation of catalytic activity;negative regulation of endopeptidase activity;n…	endopeptidase inhibitor activity;endopeptidase regulator activity;enzyme inhibitor activity;enzyme regulator activity;peptidase inhibitor activity;peptidase regulator activity;serine-type endopeptidase inhibitor activity	blood microparticle;cell part;cytoplasm;extracellular membrane-bounded organelle;extracellular organelle;extracellular region;extracellular region part;extracellular vesicular exosome;intracellular part;membrane;membrane-bounded organelle;membrane-bounded vesicle;organelle;plasma membrane;vesicle		Acutephase;Alternativesplicing;Completeproteome;Directproteinsequencing;Disulfidebond;Glycoprotein;Polymorphism;Proteaseinhibitor;Proteomicsidentification;Referenceproteome;Secreted;Serineproteaseinhibitor;Signal	GO:0002526;GO:0005975;GO:0005976;GO:0006022;GO:0006807;GO:0006950;GO:0006952;GO:0006953;GO:0006954;GO:0008152;GO:0009308;GO:0009611;GO:0010033;GO:0010466;GO:0010951;GO:0019222;GO:0030203;GO:0030212;GO:0034097;GO:0042221;GO:0043086;GO:0043170;GO:0044092;GO:0044238;GO:0050789;GO:0050790;GO:0050896;GO:0051336;GO:0051346;GO:0052547;GO:0052548;GO:0065007;GO:0065009	GO:0004857;GO:0004866;GO:0004867;GO:0030234;GO:0030414;GO:0061134;GO:0061135	GO:0005576;GO:0005737;GO:0005886;GO:0016020;GO:0031982;GO:0031988;GO:0043226;GO:0043227;GO:0043230;GO:0044421;GO:0044424;GO:0044464;GO:0065010;GO:0070062;GO:0072562	10	10	10	113	113	113	10336	0	88549	767270000	44	40	156811	256447
62148	672290	482500	490710	676280	819150	435180	9902700	4539500	4839200	17520000	15502000	14220000	9509100	9834700	4156500	5147000	12672000	10507000	8053100	3401700	7090600	9591300	8665100	9185800				activation of immune response;biological regulation;cell recognition;cellular process;complement activation;complement activation, lectin pathway;defense response;defense response to bacterium;defense response to Gram-negative bacterium;defense response to Gram-positive bacterium;humoral immune response;immune effector process;immune response;immune system process;innate immune response;macromole…	antigen binding;binding;calcium-dependent protein binding;carbohydrate binding;glycoprotein binding;mannan binding;pattern binding;polysaccharide binding;protein binding;proteoglycan binding	blood microparticle;collagen;extracellular matrix part;extracellular membrane-bounded organelle;extracellular organelle;extracellular region;extracellular region part;extracellular vesicular exosome;membrane-bounded organelle;membrane-bounded vesicle;organelle;vesicle		3D-structure;Alternativesplicing;Collagen;Complementactivationlectinpathway;Completeproteome;Directproteinsequencing;Disulfidebond;Glycoprotein;Hydroxylation;Immunity;Innateimmunity;Lectin;Polymorphism;Referenceproteome;Repeat;Secreted;Signal	GO:0001867;GO:0002252;GO:0002253;GO:0002376;GO:0002682;GO:0002684;GO:0006910;GO:0006950;GO:0006952;GO:0006955;GO:0006956;GO:0006959;GO:0008037;GO:0008152;GO:0008228;GO:0009607;GO:0009617;GO:0009987;GO:0019538;GO:0042742;GO:0043170;GO:0043654;GO:0044238;GO:0045087;GO:0048518;GO:0048583;GO:0048584;GO:0050776;GO:0050778;GO:0050789;GO:0050829;GO:0050830;GO:0050896;GO:0051704;GO:0051707;GO:0065007;GO:…	GO:0001871;GO:0001948;GO:0003823;GO:0005488;GO:0005515;GO:0030246;GO:0030247;GO:0043394;GO:0048306;GO:2001065	GO:0005576;GO:0005581;GO:0031982;GO:0031988;GO:0043226;GO:0043227;GO:0043230;GO:0044420;GO:0044421;GO:0065010;GO:0070062;GO:0072562	9	9	9	294	294	294	34001	0	18567	3670500000	14	96	243650	4.47581e+06
0	0	0	0	0	0	0	0	0	0	0	0	0	324290	0	0	0	0	0	0	0	0	0	0	0								Completeproteome;Proteomicsidentification;Referenceproteome				8	1	1	581	101	101	14185	0	72512	31924000	9	3	0	378511
360590	267250	1565000	0	656270	313290	0	0	0	0	0	0	0	190800	0	129050	0	0	0	0	343520	195420	0	0	0				cell cycle;cell cycle process;cell division;cellular component assembly;cellular component assembly at cellular level;cellular component organization;cellular component organization at cellular level;cellular component organization or biogenesis;cellular component organization or biogenesis at cellular level;cellular macromolecular complex assembly;cellular macromolecular complex subunit organiza…	binding;catalytic activity;GTP binding;GTPase activity;guanyl nucleotide binding;guanyl ribonucleotide binding;hydrolase activity;hydrolase activity, acting on acid anhydrides;hydrolase activity, acting on acid anhydrides, in phosphorus-containing anhydrides;nucleoside-triphosphatase activity;nucleotide binding;purine nucleotide binding;purine ribonucleoside triphosphate binding;purine ribonucleo…	cell part;cytoplasm;cytoplasmic microtubule;cytoplasmic part;cytoskeletal part;cytosol;endosome;extracellular membrane-bounded organelle;extracellular organelle;extracellular region part;extracellular vesicular exosome;intracellular membrane-bounded organelle;intracellular organelle;intracellular organelle part;intracellular part;macromolecular complex;membrane-bounded organelle;membrane-bounded …	Gap junction;Pathogenic Escherichia coli infection;Phagosome	Acetylation;Alternativesplicing;Completeproteome;Cytoplasm;Cytoskeleton;Directproteinsequencing;Diseasemutation;GTP-binding;Lissencephaly;Microtubule;Nitration;Nucleotide-binding;Phosphoprotein;Polymorphism;Proteomicsidentification;Referenceproteome	GO:0000086;GO:0000278;GO:0006457;GO:0006458;GO:0006461;GO:0006810;GO:0006996;GO:0007017;GO:0007049;GO:0008152;GO:0009987;GO:0016043;GO:0019538;GO:0022402;GO:0022607;GO:0030705;GO:0034621;GO:0034622;GO:0043170;GO:0043623;GO:0043933;GO:0044237;GO:0044238;GO:0044260;GO:0044267;GO:0046907;GO:0051084;GO:0051234;GO:0051258;GO:0051301;GO:0051649;GO:0065003;GO:0071822;GO:0071840;GO:0071841;GO:0071842;GO:…	GO:0000166;GO:0003824;GO:0003924;GO:0005198;GO:0005200;GO:0005488;GO:0005525;GO:0016462;GO:0016787;GO:0016817;GO:0016818;GO:0017076;GO:0017111;GO:0019001;GO:0032553;GO:0032555;GO:0032561;GO:0035639	GO:0005634;GO:0005737;GO:0005768;GO:0005829;GO:0005874;GO:0005881;GO:0031982;GO:0031988;GO:0032991;GO:0043226;GO:0043227;GO:0043229;GO:0043230;GO:0043231;GO:0043234;GO:0044421;GO:0044422;GO:0044424;GO:0044430;GO:0044444;GO:0044446;GO:0044464;GO:0055037;GO:0065010;GO:0070062	12	1	1	355	31	31	50135	0	25506	376470000	21	8	540190	865240
369580	295860	284020	0	0	0	0	0	0	90729	0	0	0	66134	62540	0	80281	0	98791	112550	0	221790	208500	75872	62078					binding;calcium ion binding;cation binding;ion binding;metal ion binding	cell part;envelope;intracellular organelle part;intracellular part;nuclear envelope;nuclear part;organelle envelope;organelle part		Alternativesplicing;Calcium;Completeproteome;Disulfidebond;EGF-likedomain;Glycoprotein;Nucleus;Polymorphism;Referenceproteome;Signal		GO:0005488;GO:0005509;GO:0043167;GO:0043169;GO:0046872	GO:0005635;GO:0031967;GO:0031975;GO:0044422;GO:0044424;GO:0044428;GO:0044446;GO:0044464	2	2	2	37	37	37	60021	0	11921	88417000	26	4	171274	87044.8
66943	78465	50136	215010	178770	149750	146300	0	0	0	0	0	26543	0	0	0	0	0	0	0	0	0	0	0	0				biological regulation;cell proliferation;hemopoietic stem cell proliferation;immune response;immune system process;negative regulation of biological process;negative regulation of biosynthetic process;negative regulation of cellular biosynthetic process;negative regulation of cellular metabolic process;negative regulation of cellular process;negative regulation of cytokine biosynthetic process;ne…	binding;carbohydrate binding;cargo receptor activity;pattern binding;polysaccharide binding;receptor activity;scavenger receptor activity	extracellular region part;extracellular space		Alternativesplicing;Completeproteome;Disulfidebond;Glycoprotein;Polymorphism;Proteoglycan;Referenceproteome;Repeat;Secreted;Signal	GO:0001817;GO:0002376;GO:0006955;GO:0008283;GO:0009889;GO:0009890;GO:0009892;GO:0010556;GO:0010558;GO:0010605;GO:0019222;GO:0031323;GO:0031324;GO:0031326;GO:0031327;GO:0032675;GO:0042035;GO:0042036;GO:0042127;GO:0045408;GO:0045409;GO:0048519;GO:0048523;GO:0050789;GO:0050794;GO:0050896;GO:0051239;GO:0051246;GO:0051248;GO:0060255;GO:0065007;GO:0071425;GO:0080090	GO:0001871;GO:0004872;GO:0005044;GO:0005488;GO:0030246;GO:0030247;GO:0038024	GO:0005615;GO:0044421	3	3	3	26	26	26	15106	0	20344	149220000	104	16	62161.9	43306
254070	0	0	973270	954100	911920	773200	757430	339070	539640	1728500	1112600	542780	364770	290150	290600	329110	500800	310620	0	291390	0	388720	346500	503000				cellular component organization;cellular component organization or biogenesis;cellular membrane organization;cellular process;developmental process;endocytosis;establishment of localization;membrane invagination;membrane organization;multicellular organismal development;multicellular organismal process;receptor-mediated endocytosis;transport;vesicle-mediated transport	binding;carbohydrate binding;mannose binding;monosaccharide binding;sugar binding	collagen;extracellular matrix part;extracellular region;extracellular region part	Phagosome	Alternativesplicing;Calcium;Coiledcoil;Collagen;Completeproteome;Developmentalprotein;Diseasemutation;Disulfidebond;Lectin;Mannose-binding;Polymorphism;Referenceproteome;Secreted;Signal	GO:0006810;GO:0006897;GO:0006898;GO:0007275;GO:0009987;GO:0010324;GO:0016043;GO:0016044;GO:0016192;GO:0032501;GO:0032502;GO:0051234;GO:0061024;GO:0071840	GO:0005488;GO:0005529;GO:0005537;GO:0030246;GO:0048029	GO:0005576;GO:0005581;GO:0044420;GO:0044421	3	3	3	92	92	92	28665	0	31152	230140000	11	15	450147	260117
863030	694760	665750	55592	0	78543	90273	254900	455210	475680	854580	615320	417560	845560	980490	1023400	1206000	760610	699040	795920	809270	801870	799320	482900	837750				amine catabolic process;amine metabolic process;carboxylic acid catabolic process;carboxylic acid metabolic process;catabolic process;cellular amine metabolic process;cellular amino acid catabolic process;cellular amino acid metabolic process;cellular catabolic process;cellular ketone metabolic process;cellular macromolecule catabolic process;cellular macromolecule metabolic process;cellular meta…	active transmembrane transporter activity;anion transmembrane transporter activity;ATPase activity;ATPase activity, coupled;ATPase activity, coupled to movement of substances;ATPase activity, coupled to transmembrane movement of ions;ATPase activity, coupled to transmembrane movement of ions, phosphorylative mechanism;ATPase activity, coupled to transmembrane movement of substances;catalytic acti…	cell part;cytoplasmic part;extracellular membrane-bounded organelle;extracellular organelle;extracellular region part;extracellular vesicular exosome;intracellular membrane-bounded organelle;intracellular organelle;intracellular organelle part;intracellular part;lysosome;lytic vacuole;macromolecular complex;membrane;membrane-bounded organelle;membrane-bounded vesicle;organelle;organelle membrane;…		Alternativesplicing;Completeproteome;Directproteinsequencing;FAD;Flavoprotein;Glycoprotein;Isopeptidebond;Lysosome;Oxidoreductase;Polymorphism;Proteomicsidentification;Referenceproteome;Signal;Ublconjugation	GO:0006082;GO:0006508;GO:0006520;GO:0006575;GO:0006807;GO:0008152;GO:0009056;GO:0009057;GO:0009063;GO:0009308;GO:0009310;GO:0009987;GO:0016054;GO:0019538;GO:0019752;GO:0019941;GO:0030327;GO:0030328;GO:0030329;GO:0034641;GO:0042180;GO:0042219;GO:0043170;GO:0043436;GO:0043632;GO:0044106;GO:0044237;GO:0044238;GO:0044248;GO:0044260;GO:0044265;GO:0044281;GO:0044282;GO:0046395;GO:0051603;GO:0055114	GO:0001735;GO:0003824;GO:0005215;GO:0008509;GO:0008555;GO:0015075;GO:0015103;GO:0015108;GO:0015399;GO:0015405;GO:0015662;GO:0016462;GO:0016491;GO:0016667;GO:0016670;GO:0016787;GO:0016817;GO:0016818;GO:0016820;GO:0016887;GO:0017111;GO:0022804;GO:0022857;GO:0022891;GO:0022892;GO:0042623;GO:0042625;GO:0042626;GO:0043492	GO:0000323;GO:0005764;GO:0005773;GO:0005774;GO:0005886;GO:0016020;GO:0031090;GO:0031982;GO:0031988;GO:0032991;GO:0032994;GO:0034358;GO:0034361;GO:0034385;GO:0043226;GO:0043227;GO:0043229;GO:0043230;GO:0043231;GO:0044421;GO:0044422;GO:0044424;GO:0044437;GO:0044444;GO:0044446;GO:0044464;GO:0065010;GO:0070062	4	4	4	77	77	77	56639	0	26978	514330000	23	7	372398	136561
[truncated: 13 more columns]

## Sheet: RPA_HP
Protein name	Gene name	GOBP name	Keywords	iBAQ mean	std_dev	RPA, %	SD, %	Keywords
Apolipoprotein C-II;Proapolipoprotein C-II	APOC4-APOC2;APOC2	biological regulation;catabolic process;cellular component organization;cellular component organization or biogenesis;cellular lipid metabolic process;cellular macromolecule metabolic process;cellular metabolic process;cellular process;cellular response to stimulus;chemical homeostasis;cholesterol efflux;cholesterol homeostasis;cholesterol transport;chylomicron remnant clearance;chylomicron remod…	3D-structure;Chylomicron;Completeproteome;Directproteinsequencing;Diseasemutation;Glycoprotein;HDL;Hyperlipidemia;LDL;Lipiddegradation;Lipidmetabolism;Lipidtransport;Polymorphism;Referenceproteome;Secreted;Sialicacid;Signal;Transport;VLDL	1.60733e+09	3.15891e+08	27.645	5.4331	Lipoprotein
Ig mu chain C region	IGHM	adaptive immune response;antibacterial humoral response;antimicrobial humoral response;defense response;defense response to bacterium;defense response to Gram-negative bacterium;humoral immune response;immune response;immune system process;innate immune response;multi-organism process;response to bacterium;response to biotic stimulus;response to other organism;response to stimulus;response to str…	3D-structure;Alternativesplicing;Cellmembrane;Completeproteome;Directproteinsequencing;Disulfidebond;Glycoprotein;ImmunoglobulinCregion;Immunoglobulindomain;Membrane;Polymorphism;Referenceproteome;Secreted;Transmembrane	773271424	1.70046e+08	13.2997	2.92468	Immunoglobulin
Apolipoprotein E	APOE	acylglycerol catabolic process;acylglycerol metabolic process;aging;alcohol metabolic process;alpha-amino-3-hydroxy-5-methyl-4-isoxazole propionate receptor clustering;anatomical structure morphogenesis;artery morphogenesis;axon regeneration;axonogenesis;biological regulation;biosynthetic process;blood vessel morphogenesis;calcium ion homeostasis;carboxylic acid transport;catabolic process;cation…	3D-structure;Alzheimerdisease;Amyloidosis;Cholesterolmetabolism;Chylomicron;Completeproteome;Directproteinsequencing;Diseasemutation;Glycation;Glycoprotein;HDL;Heparin-binding;Hyperlipidemia;Lipidmetabolism;Lipidtransport;Neurodegeneration;Oxidation;Phosphoprotein;Polymorphism;Proteomicsidentification;Referenceproteome;Repeat;Secreted;Signal;Steroidmetabolism;Sterolmetabolism;Transport;VLDL	5.41656e+08	3.6537e+07	9.31611	0.628411	Lipoprotein
Apolipoprotein C-I;Truncated apolipoprotein C-I	APOC1	acylglycerol metabolic process;alcohol metabolic process;biological regulation;cellular component assembly;cellular component organization;cellular component organization or biogenesis;cellular lipid metabolic process;cellular macromolecule metabolic process;cellular metabolic process;cellular process;cholesterol efflux;cholesterol metabolic process;cholesterol transport;chylomicron remnant clear…	3D-structure;Completeproteome;Directproteinsequencing;Lipidtransport;Polymorphism;Proteomicsidentification;Referenceproteome;Secreted;Signal;Transport;VLDL	4.12437e+08	1.39085e+08	7.09364	2.39217	Lipoprotein
Ig kappa chain C region	IGKC	activation of immune response;anatomical structure homeostasis;biological regulation;cellular component organization;cellular component organization or biogenesis;cellular membrane organization;cellular process;complement activation;complement activation, classical pathway;defense response;endocytosis;establishment of localization;homeostatic process;humoral immune response;immune effector proces…	3D-structure;Completeproteome;Directproteinsequencing;Diseasemutation;Disulfidebond;ImmunoglobulinCregion;Immunoglobulindomain;Referenceproteome	404244288	1.77169e+08	6.95273	3.04719	Immunoglobulin
Apolipoprotein C-III	APOC3	acylglycerol catabolic process;acylglycerol metabolic process;alcohol metabolic process;biological regulation;carbohydrate homeostasis;catabolic process;cell surface receptor linked signaling pathway;cellular catabolic process;cellular chemical homeostasis;cellular component assembly;cellular component organization;cellular component organization or biogenesis;cellular glucose homeostasis;cellula…	3D-structure;Chylomicron;Completeproteome;Directproteinsequencing;Diseasemutation;Glycoprotein;Lipiddegradation;Lipidmetabolism;Lipidtransport;Lipoprotein;Polymorphism;Proteomicsidentification;Referenceproteome;Secreted;Sialicacid;Signal;Transport;VLDL	3.81629e+08	1.13199e+08	6.56375	1.94694	Lipoprotein
Immunoglobulin lambda-like polypeptide 5;Ig lambda-1 chain C regions	IGLL5;IGLC1	activation of immune response;biological regulation;cellular component organization;cellular component organization or biogenesis;cellular membrane organization;cellular process;complement activation;complement activation, classical pathway;defense response;endocytosis;establishment of localization;humoral immune response;immune effector process;immune response;immune system process;innate immune…	3D-structure;Alternativesplicing;Bence-Jonesprotein;Completeproteome;Directproteinsequencing;Disulfidebond;ImmunoglobulinCregion;Immunoglobulindomain;Proteomicsidentification;Referenceproteome;Secreted;Signal	220120000	7.65733e+07	3.78591	1.31701	Immunoglobulin
Immunoglobulin J chain	IGJ;JCHAIN	adaptive immune response;anatomical structure homeostasis;antibacterial humoral response;antimicrobial humoral response;biological regulation;defense response;defense response to bacterium;glomerular filtration;homeostatic process;humoral immune response;immune response;immune system process;innate immune response;multicellular organismal process;multi-organism process;positive regulation of biol…	Completeproteome;Directproteinsequencing;Disulfidebond;Glycoprotein;Proteomicsidentification;Pyrrolidonecarboxylicacid;Referenceproteome;Secreted;Signal	1.92647e+08	5.59815e+07	3.3134	0.962843	Immunoglobulin
CD5 antigen-like	CD5L	apoptosis;cell death;cellular defense response;cellular process;death;defense response;programmed cell death;response to stimulus;response to stress	Apoptosis;Completeproteome;Directproteinsequencing;Disulfidebond;Polymorphism;Referenceproteome;Repeat;Secreted;Signal	9.60447e+07	2.80386e+07	1.6519	0.482245	Membrane receptor
Apolipoprotein A-II;Proapolipoprotein A-II;Truncated apolipoprotein A-II	APOA2	acute inflammatory response;acylglycerol catabolic process;acylglycerol metabolic process;alcohol metabolic process;amine metabolic process;anatomical structure morphogenesis;biological regulation;biosynthetic process;catabolic process;cellular amine metabolic process;cellular biogenic amine metabolic process;cellular biosynthetic process;cellular catabolic process;cellular component assembly;cel…	3D-structure;Cleavageonpairofbasicresidues;Completeproteome;Directproteinsequencing;Disulfidebond;Glycoprotein;HDL;Host-virusinteraction;Lipidtransport;Oxidation;Phosphoprotein;Proteomicsidentification;Pyrrolidonecarboxylicacid;Referenceproteome;Secreted;Signal;Transport	87072000	5.07171e+07	1.49758	0.872299	Lipoprotein
	IGHV3-74;IGHV3OR16-13		Completeproteome;Proteomicsidentification;Referenceproteome	7.37597e+07	3.50148e+07	1.26862	0.60223	Immunoglobulin
Haptoglobin;Haptoglobin alpha chain;Haptoglobin beta chain	HP	acute inflammatory response;acute-phase response;biological regulation;cellular component organization;cellular component organization or biogenesis;cellular membrane organization;cellular process;defense response;defense response to bacterium;endocytosis;establishment of localization;immune system process;inflammatory response;membrane invagination;membrane organization;multi-organism process;ne…	3D-structure;Acutephase;Alternativesplicing;Antibiotic;Antimicrobial;Antioxidant;Completeproteome;Directproteinsequencing;Diseasemutation;Disulfidebond;Glycoprotein;Hemoglobin-binding;Immunity;Polymorphism;Proteomicsidentification;Referenceproteome;Repeat;Secreted;Serineproteasehomolog;Signal;Sushi	7.04016e+07	1.21084e+07	1.21086	0.208256	Acute phase
Apolipoprotein A-I;Proapolipoprotein A-I;Truncated apolipoprotein A-I	APOA1	adrenal gland development;alcohol metabolic process;amine metabolic process;anatomical structure development;anatomical structure morphogenesis;axon regeneration;axonogenesis;biological regulation;biosynthetic process;blood coagulation;blood vessel endothelial cell migration;C21-steroid hormone metabolic process;cell activation;cell migration;cell motility;cell part morphogenesis;cell projection …	3D-structure;Amyloid;Amyloidosis;Atherosclerosis;Cholesterolmetabolism;Completeproteome;Directproteinsequencing;Diseasemutation;Glycation;Glycoprotein;HDL;Lipidmetabolism;Lipidtransport;Lipoprotein;Neuropathy;Oxidation;Palmitate;Phosphoprotein;Polymorphism;Proteomicsidentification;Referenceproteome;Repeat;Secreted;Signal;Steroidmetabolism;Sterolmetabolism;Transport	6.96296e+07	1.89638e+07	1.19758	0.326165	Lipoprotein
von Willebrand factor;von Willebrand antigen 2	VWF	anatomical structure development;biological adhesion;biological regulation;blood coagulation;blood coagulation, intrinsic pathway;cell activation;cell adhesion;cell-substrate adhesion;cellular component assembly;cellular component organization;cellular component organization at cellular level;cellular component organization or biogenesis;cellular component organization or biogenesis at cellular l…	3D-structure;Alternativesplicing;Bloodcoagulation;Celladhesion;Cleavageonpairofbasicresidues;Completeproteome;Directproteinsequencing;Diseasemutation;Disulfidebond;Extracellularmatrix;Glycoprotein;Hemostasis;Isopeptidebond;Polymorphism;Referenceproteome;Repeat;Secreted;Signal;Ublconjugation;vonWillebranddisease	6.25157e+07	1.16746e+07	1.07523	0.200796	Coagulation
Ig alpha-1 chain C region	IGHA1	anatomical structure homeostasis;antibacterial humoral response;antimicrobial humoral response;biological regulation;cellular component organization;cellular component organization or biogenesis;cellular macromolecule metabolic process;cellular membrane organization;cellular metabolic process;cellular process;cellular protein metabolic process;defense response;defense response to bacterium;endocy…	3D-structure;Chromophore;Chromosomalrearrangement;Completeproteome;Directproteinsequencing;Disulfidebond;Glycoprotein;ImmunoglobulinCregion;Immunoglobulindomain;Polymorphism;Referenceproteome;Repeat	5.48046e+07	1.50802e+07	0.942601	0.259369	Immunoglobulin
Apolipoprotein B-100;Apolipoprotein B-48	APOB	acylglycerol catabolic process;acylglycerol metabolic process;alcohol metabolic process;anatomical structure development;anatomical structure morphogenesis;artery morphogenesis;biological regulation;biosynthetic process;blood coagulation;blood vessel morphogenesis;catabolic process;cell migration;cell motility;cellular biosynthetic process;cellular catabolic process;cellular component assembly;ce…	Acetylation;Atherosclerosis;Cholesterolmetabolism;Chylomicron;Completeproteome;Cytoplasm;Directproteinsequencing;Diseasemutation;Disulfidebond;Glycoprotein;Heparin-binding;LDL;Lipidmetabolism;Lipidtransport;Lipoprotein;Palmitate;Phosphoprotein;Polymorphism;Referenceproteome;RNAediting;Secreted;Signal;Steroidmetabolism;Sterolmetabolism;Transport;VLDL	48652000	3.71389e+06	0.836781	0.0638763	Lipoprotein
	IGKV2-24;IGKV2D-24		Completeproteome;Proteomicsidentification;Referenceproteome	3.92844e+07	1.66366e+07	0.675665	0.286138	Immunoglobulin
Apolipoprotein D	APOD	aging;alcohol metabolic process;anatomical structure development;anatomical structure formation involved in morphogenesis;anatomical structure morphogenesis;angiogenesis;axon regeneration;axonogenesis;biological regulation;brain development;carbohydrate metabolic process;cell part morphogenesis;cell projection morphogenesis;cell projection organization;cellular carbohydrate metabolic process;cell…	3D-structure;Completeproteome;Directproteinsequencing;Disulfidebond;Glycoprotein;Lipid-binding;Polymorphism;Proteomicsidentification;Pyrrolidonecarboxylicacid;Referenceproteome;Secreted;Signal;Transport	36226000	1.61396e+07	0.623062	0.277589	Lipoprotein
C4b-binding protein alpha chain	C4BPA	activation of immune response;biological regulation;complement activation;complement activation, classical pathway;defense response;humoral immune response;immune effector process;immune response;immune system process;innate immune response;macromolecule metabolic process;metabolic process;negative regulation of biological process;negative regulation of complement activation;negative regulation o…	3D-structure;Complementpathway;Completeproteome;Directproteinsequencing;Disulfidebond;Glycoprotein;Immunity;Innateimmunity;Polymorphism;Referenceproteome;Repeat;Secreted;Signal;Sushi	3.51673e+07	5.47193e+06	0.604853	0.0941135	Complement
Ig kappa chain V-III region B6		activation of immune response;biological regulation;cellular component organization;cellular component organization or biogenesis;cellular membrane organization;cellular process;complement activation;complement activation, classical pathway;defense response;endocytosis;establishment of localization;humoral immune response;immune effector process;immune response;immune system process;innate immune…	Bence-Jonesprotein;Completeproteome;Directproteinsequencing;Disulfidebond;Immunoglobulindomain;ImmunoglobulinVregion;Referenceproteome	3.28036e+07	5.775e+06	0.564199	0.099326	Immunoglobulin
	IGHV3-72		Completeproteome;Proteomicsidentification;Referenceproteome	31485500	2.11979e+07	0.541529	0.36459	Immunoglobulin
Serum amyloid A-4 protein	SAA2-SAA4;SAA4	acute inflammatory response;acute-phase response;cell chemotaxis;cell migration;cell motility;cellular component movement;cellular process;cellular response to chemical stimulus;cellular response to stimulus;chemotaxis;defense response;inflammatory response;locomotion;positive chemotaxis;response to chemical stimulus;response to external stimulus;response to stimulus;response to stress;response t…	Acutephase;Completeproteome;Directproteinsequencing;Glycoprotein;HDL;Polymorphism;Referenceproteome;Secreted;Signal	2.93507e+07	1.14427e+07	0.504812	0.196806	Acute phase
Galectin-3-binding protein	LGALS3BP	biological adhesion;biological regulation;cell adhesion;cellular component organization;cellular component organization or biogenesis;cellular defense response;cellular membrane organization;cellular process;cellular response to stimulus;defense response;endocytosis;establishment of localization;membrane invagination;membrane organization;receptor-mediated endocytosis;regulation of biological pro…	3D-structure;Celladhesion;Completeproteome;Directproteinsequencing;Disulfidebond;Extracellularmatrix;Glycoprotein;Referenceproteome;Secreted;Signal	2.88489e+07	7.72368e+06	0.496181	0.132842	ECM
Ig heavy chain V-III region JON;Ig heavy chain V-III region WEA;Ig heavy chain V-III region TRO	IGHV3-21	activation of immune response;biological regulation;cellular component organization;cellular component organization or biogenesis;cellular membrane organization;cellular process;complement activation;complement activation, classical pathway;defense response;endocytosis;establishment of localization;humoral immune response;immune effector process;immune response;immune system process;innate immune…	Completeproteome;Directproteinsequencing;Glycoprotein;Immunoglobulindomain;ImmunoglobulinVregion;Phosphoprotein;Proteomicsidentification;Pyrrolidonecarboxylicacid;Referenceproteome	2.52011e+07	3.05008e+06	0.433442	0.0524593	Immunoglobulin
Serum albumin	ALB	anatomical structure homeostasis;anion transport;behavior;bile acid and bile salt transport;bile acid metabolic process;biological regulation;blood coagulation;carboxylic acid metabolic process;carboxylic acid transport;cell activation;cell communication;cell killing;cellular component organization;cellular component organization or biogenesis;cellular ketone metabolic process;cellular macromolec…	3D-structure;Alternativesplicing;Cleavageonpairofbasicresidues;Completeproteome;Copper;Directproteinsequencing;Diseasemutation;Disulfidebond;Glycation;Glycoprotein;Lipid-binding;Metal-binding;Phosphoprotein;Polymorphism;Proteomicsidentification;Referenceproteome;Repeat;Secreted;Signal;Zinc	2.45287e+07	3.39614e+06	0.421877	0.0584114	Albumin
C4b-binding protein beta chain	C4BPB	activation of immune response;biological regulation;blood coagulation;coagulation;complement activation;complement activation, classical pathway;defense response;hemostasis;humoral immune response;immune effector process;immune response;immune system process;innate immune response;macromolecule metabolic process;metabolic process;multicellular organismal process;negative regulation of biological …	Alternativesplicing;Complementpathway;Completeproteome;Disulfidebond;Glycoprotein;Immunity;Innateimmunity;Polymorphism;Referenceproteome;Repeat;Secreted;Signal;Sushi	2.20822e+07	1.66372e+07	0.379799	0.286148	Complement
	IGLV8-61		Completeproteome;Proteomicsidentification;Referenceproteome	2.12663e+07	1.52606e+07	0.365766	0.262472	Immunoglobulin
Hemoglobin subunit beta;LVV-hemorphin-7;Spinorphin;Hemoglobin subunit delta	HBB;HBD	anion transport;bicarbonate transport;biological adhesion;biological regulation;blood coagulation;catabolic process;cell adhesion;cell-cell adhesion;cellular catabolic process;cellular component assembly;cellular component organization;cellular component organization or biogenesis;cellular membrane organization;cellular metabolic process;cellular process;cellular response to chemical stimulus;cel…	3D-structure;Acetylation;Completeproteome;Congenitaldyserythropoieticanemia;Directproteinsequencing;Diseasemutation;Glycation;Glycoprotein;Heme;Hereditaryhemolyticanemia;Hypotensiveagent;Iron;Metal-binding;Oxygentransport;Phosphoprotein;Polymorphism;Proteomicsidentification;Pyruvate;Referenceproteome;S-nitrosylation;Transport;Vasoactive	1.68462e+07	9.0169e+06	0.289744	0.155085	Hemoglobin
Ig gamma-2 chain C region	IGHG2	activation of immune response;biological regulation;complement activation;complement activation, classical pathway;defense response;humoral immune response;immune effector process;immune response;immune system process;innate immune response;macromolecule metabolic process;metabolic process;positive regulation of biological process;positive regulation of immune response;positive regulation of immu…	3D-structure;Completeproteome;Directproteinsequencing;Disulfidebond;Glycoprotein;ImmunoglobulinCregion;Immunoglobulindomain;Referenceproteome;Secreted	1.54022e+07	5.81893e+06	0.264907	0.100082	Immunoglobulin
[truncated: 154 more rows]

## Sheet: RPA_Mlph
Protein name	Gene name	GOBP name	Keywords	iBAQ mean	std_dev	RPA, %	SD, %	Keywords
[truncated: 183 more rows]

[truncated: 3 more sheets: RPA_5SX, RPA_10SX, LFQ intensities_raw]
