# Supplementary material for: Protein Corona Attenuates the Targeting of Antitumor Sialyl Lewis X-Decorated Liposomes to Vascular Endothelial Cells under Flow Conditions
Source: Pharmaceutics. 2023 Jun 16;15(6):1754. doi: 10.3390/pharmaceutics15061754 (PMC10303272; doi:10.3390/pharmaceutics15061754)
Supplement: Supplementary file 1 [file pharmaceutics-15-01754-s001.zip › Supplementary Table S2.xlsx]

## Sheet: Mlph data analysis ANOVA Tuckey
HP	EPC	MLPH	5SX	10SX	Only identified by site	Reverse	Potential contaminant	ANOVA Significant	Peptides	Razor + unique peptides	Unique peptides	Sequence coverage [%]	Unique + razor sequence coverage [%]	Unique sequence coverage [%]	Mol. weight [kDa]	Q-value	Score	Intensity	iBAQ peptides	MS/MS count	#NAME?	ANOVA q-value	Protein IDs	Majority protein IDs	Protein names	Gene names	id	Significant pairs
#!{Type}E	E	E	E	E	C	C	C	C	N	N	N	N	N	N	N	N	N	N	N	N	N	N	T	T	T	T	T	T
-9.54628	9.54628	-8.91969	4.46393	-9.26785				+	19	19	19	428	428	428	46708	0	22589	18887000000	23	203	11.2343	0	A0A024R6I7;P01009;A0A0G2JRN3;G3V2B9;G3V5R8;G3V387;A0A0B4J278;G3V544	A0A024R6I7;P01009;A0A0G2JRN3	Alpha-1-antitrypsin;Short peptide from AAT	SERPINA1	0	5SX_10SX;EPC_10SX;5SX_HP;EPC_HP;5SX_MLPH;EPC_MLPH;EPC_5SX
0	0	0	0	0				+	2	2	2	148	148	148	12814	0	1539	1722300000	4	34	1.1836	0.0180606	A0A075B6I0	A0A075B6I0		IGLV8-61	1
0	0	-2.79357	-1.60384	2.79357				+	3	3	2	165	165	165	12441	0	1809	1147900000	4	29	2.62089	0.000540541	A0A075B6K4;P01715	A0A075B6K4		IGLV3-10	2	10SX_MLPH;10SX_5SX
0	0	0	0	0				+	2	2	1	167	167	108	13079	0	176	3900600000	4	30	0.87569	0.0405091	A0A0C4DH68;A0A075B6R9	A0A0C4DH68;A0A075B6R9		IGKV2-24;IGKV2D-24	4
4.30564	-4.30564	-3.19467	-3.88299	-2.71907				+	34	34	34	134	134	134	57201	0	2964	8130500000	163	293	4.5562	0	Q9Y6R7;A0A087WXI2;A0A087WUZ2	Q9Y6R7;A0A087WXI2	IgGFc-binding protein	FCGBP	12	HP_5SX;HP_EPC;HP_MLPH;HP_10SX
0	0	0	0	0				+	4	4	4	79	79	79	57519	0	24647	899940000	22	15	1.07998	0.0227048	F8WCZ6;A0A087X232;P09871;F5H7T4;H0Y5D1	F8WCZ6;A0A087X232;P09871;F5H7T4;H0Y5D1	Complement C1s subcomponent;Complement C1s subcomponent heavy chain;Complement C1s subcomponent light chain	C1S	15
-5.78876	-5.50639	-1.91973	5.33265	5.78876				+	5	5	5	255	255	255	23353	0	4556	37791000000	12	225	7.53377	0	A0A096LPE2;P35542	A0A096LPE2;P35542	Serum amyloid A-4 protein	SAA2-SAA4;SAA4	16	MLPH_HP;5SX_HP;10SX_HP;5SX_EPC;10SX_EPC;5SX_MLPH;10SX_MLPH
-9.54583	9.54583	-5.66064	6.62837	-4.70312				+	12	12	6	479	479	279	36105	0	19422	25972000000	15	178	9.60442	0	P01857;A0A0A0MS08;A0A0A0MS07	P01857;A0A0A0MS08;A0A0A0MS07	Ig gamma-1 chain C region	IGHG1	20	MLPH_HP;10SX_HP;5SX_HP;EPC_HP;5SX_MLPH;EPC_MLPH;5SX_10SX;EPC_10SX
0	1.8802	-1.8802	0	0				+	4	4	4	202	202	202	2403	0	36276	596330000	11	21	2.01668	0.0024	A0A0A0MSV6;D6R934;P02746;D6RGJ1	A0A0A0MSV6;D6R934;P02746	Complement C1q subcomponent subunit B	C1QB	23	EPC_MLPH
2.13984	4.01055	-4.01055	0	1.85388				+	12	12	12	151	151	151	10828	0	81124	1909600000	43	92	3.48292	0.000142857	M0R116;A0A2R8YEY8;A0A0A0MT26;P13637;B1AKY9;P50993;P05023;H0Y7C1;M0QXF2;Q13733;P54707;P20648;Q5TC05;A0A669K9X0;E9PRA5	M0R116;A0A2R8YEY8;A0A0A0MT26;P13637;B1AKY9;P50993;P05023;H0Y7C1	Sodium/potassium-transporting ATPase subunit alpha-3;Sodium/potassium-transporting ATPase subunit alpha-2;Sodium/potassium-transporting ATPase subunit alpha-1	ATP1A3;ATP1A2;ATP1A1	25	10SX_MLPH;HP_MLPH;EPC_MLPH
0	0	0	0	0				+	2	2	2	132	132	132	13481	0	13292	1553400000	4	36	1.25907	0.0146392	A0A0B4J1U7	A0A0B4J1U7		IGHV6-1	26
4.74415	-2.39274	-2.93729	-4.74415	1.3502				+	4	2	2	261	126	126	12926	0	22265	488290000	7	21	4.42092	0	A0A0B4J1V0	A0A0B4J1V0		IGHV3-15	27	10SX_5SX;HP_5SX;HP_MLPH;HP_EPC
1.806	0	-1.52569	-1.806	0				+	4	4	2	376	376	188	12839	0	29092	12582000000	7	109	1.8147	0.00347253	A0A0B4J1X5;A0A075B7E8;A0A0J9YVY3	A0A0B4J1X5;A0A075B7E8		IGHV3-74;IGHV3OR16-13	28	HP_5SX;HP_MLPH
4.87492	-2.31867	-4.87492	-4.42956	-2.4426				+	8	8	3	488	488	205	2315	0	32331	83372000000	11	292	5.09037	0	A0A0B4J231;B9A064;A0A5H1ZRQ4;P0CG04	A0A0B4J231;B9A064;A0A5H1ZRQ4;P0CG04	Immunoglobulin lambda-like polypeptide 5;Ig lambda-1 chain C regions	IGLL5;IGLC1	30	HP_MLPH;HP_5SX;HP_10SX;HP_EPC
0	0	0	0	0				+	3	3	3	342	342	342	12674	0	25763	1310800000	6	28	0.8427	0.0451171	A0A0C4DH38;A0A0J9YXX1	A0A0C4DH38;A0A0J9YXX1		IGHV5-51	41
0	0	0	0	0					2	2	2	214	214	214	13016	0	14303	881450000	4	38	0.178504	0.46522	P0DP08;P0DP06;A0A0C4DH41;P01825;P06331;P01824;A0A0J9YWU9;A0A087WW49;A0A075B6R2;P0DP07;A0A087WSY4	P0DP08;P0DP06;A0A0C4DH41;P01825;P06331;P01824;A0A0J9YWU9;A0A087WW49;A0A075B6R2;P0DP07;A0A087WSY4	Ig heavy chain V-II region NEWM;Ig heavy chain V-II region ARH-77;Ig heavy chain V-II region WAH	IGHV4-61;IGHV4-4;IGHV4-31	42
2.18868	-4.1444	4.1444	-3.15974	-1.6136				+	17	17	17	252	252	252	73757	0	29143	8956900000	30	190	4.37064	0	A0A3B3ISJ1;A0A0S2Z4L3;P07225;G5E9F8;A0A3B3IRK9;A0A3B3IUA6	A0A3B3ISJ1;A0A0S2Z4L3;P07225;G5E9F8;A0A3B3IRK9	Vitamin K-dependent protein S	PROS1	49	HP_EPC;MLPH_EPC;HP_5SX;MLPH_5SX;MLPH_10SX
0	2.1131	-2.1131	-1.92073	-2.05221				+	3	3	3	269	269	269	14135	0	27351	442940000	5	18	2.83995	0.0004	P04908;P0C0S8;A0A0U1RR32;A0A0U1RRH7;Q7L7L0;P20671;Q93077;Q99878;Q6FI13;Q16777;Q9BTM1;Q96KK5;P0C0S5;H0YFX9;Q96QV6;P16104;Q71UI9;A0A494C189;C9J0D1;A0A3B3IS11;Q8IUE6;C9J386	P04908;P0C0S8;A0A0U1RR32;A0A0U1RRH7;Q7L7L0;P20671;Q93077;Q99878;Q6FI13;Q16777;Q9BTM1;Q96KK5;P0C0S5;H0YFX9;Q96QV6;P16104;Q71UI9;A0A494C189;C9J0D1;A0A3B3IS11	Histone H2A type 1-B/E;Histone H2A type 1;Histone H2A type 3;Histone H2A type 1-D;Histone H2A type 1-C;Histone H2A type 1-J;Histone H2A type 2-A;Histone H2A type 2-C;Histone H2A.J;Histone H2A type 1-H;Histone H2A.Z;Histone H2A;Histone H2A type 1-A;Histone H2AX;Histone H2A.V	HIST1H2AB;HIST1H2AG;HIST3H2A;HIST1H2AD;HIST1H2AC;HIST1H2AJ;HIST2H2AA3;HIST2H2AC;H2AFJ;HIST1H2AH;H2AFZ;HIST1H2AA;H2AFX;H2AFV	50	EPC_MLPH;EPC_10SX;EPC_5SX
-5.81747	6.04985	3.00703	2.20908	-6.04985				+	32	32	32	235	235	235	18766	0	32331	15359000000	77	279	6.88081	0	A0A140TA44;A0A140TA49;A0A140TA32;F5GXS0;A0A0G2JL54;A0A0G2JPR0;P0C0L4;P0C0L5;A0A140TA29;A0A3B3ISA6;CON__P01030;CON__ENSEMBL:ENSBTAP00000007350;A0A3B3ISD7	A0A140TA44;A0A140TA49;A0A140TA32;F5GXS0;A0A0G2JL54;A0A0G2JPR0;P0C0L4;P0C0L5;A0A140TA29;A0A3B3ISA6	Complement C4-A;Complement C4 beta chain;Complement C4-A alpha chain;C4a anaphylatoxin;C4b-A;C4d-A;Complement C4 gamma chain;Complement C4-B;Complement C4 beta chain;Complement C4-B alpha chain;C4a anaphylatoxin;C4b-B;C4d-B;Complement C4 gamma chain	C4B;C4A	51	5SX_10SX;MLPH_10SX;EPC_10SX;5SX_HP;MLPH_HP;EPC_HP;EPC_5SX
0	0	0	0	0				+	6	6	6	115	115	115	73502	0	38082	308340000	38	17	1.18218	0.01796	A0A1C7CYX9;Q16555;E5RFU4;E9PD68;Q14194	A0A1C7CYX9;Q16555	Dihydropyrimidinase-related protein 2	DPYSL2	53
0	0	0	0	0				+	11	5	3	327	204	141	49021	0	54165	5692000000	19	105	0.960985	0.0306055	A0A286YES1;A0A4W9A917;P01860	A0A286YES1;A0A4W9A917;P01860	Ig gamma-3 chain C region	IGHG3	55
2.75608	4.4656	-4.4656	0	1.94162				+	11	11	4	407	407	148	42848	0	11334	18890000000	14	76	4.00659	0	A0A286YEY1;P01876	A0A286YEY1;P01876	Ig alpha-1 chain C region	IGHA1	56	10SX_MLPH;HP_MLPH;EPC_MLPH
0	1.66652	-1.40409	-1.66652	0				+	10	5	4	322	208	172	43805	0	5174	7780000000	14	38	1.79294	0.00347826	A0A286YEY4;P01859	A0A286YEY4;P01859	Ig gamma-2 chain C region	IGHG2	57	EPC_5SX;EPC_MLPH
0	0	0	0	0					2	2	2	42	42	42	62104	0	19545	149990000	21	10	0.199776	0.430838	P43004;A0A2R8YD46;A0A2R8Y4N0;A0A2R8YFE3;A0A2R8Y860;A0A2R8Y4W1;A0A2U3TZS7;A0A2R8YHI4;A0A163QEF0;A0A2R8Y6B8;H0YEK4;H0YEB1;A0A2R8YG01;A0A2R8Y740;A0A2R8Y862;A0A2R8Y6J5;A0A2U3U0E3;A0A2R8Y642;A0A2R8Y5Y1	P43004;A0A2R8YD46;A0A2R8Y4N0;A0A2R8YFE3;A0A2R8Y860;A0A2R8Y4W1;A0A2U3TZS7;A0A2R8YHI4;A0A163QEF0;A0A2R8Y6B8;H0YEK4;H0YEB1;A0A2R8YG01;A0A2R8Y740;A0A2R8Y862;A0A2R8Y6J5;A0A2U3U0E3;A0A2R8Y642;A0A2R8Y5Y1	Excitatory amino acid transporter 2;Amino acid transporter	SLC1A2	58
3.18166	2.37076	-3.18166	0	0				+	18	18	18	298	298	298	80173	0	15414	3785700000	34	63	3.12516	0.00025	A0A3B3ISR2;B4DPQ0;P00736;F5H2D0;A0A3B3ITU4;F5H1V0;F5H6Y3;F5H3N3;H0YFL7;Q9NZP8	A0A3B3ISR2;B4DPQ0;P00736;F5H2D0;A0A3B3ITU4	Complement C1r subcomponent;Complement C1r subcomponent heavy chain;Complement C1r subcomponent light chain	C1R	59	EPC_MLPH;HP_MLPH
1.36615	0	0	-1.36615	0				+	4	4	1	455	455	109	11167	0	50666	5422700000	6	53	1.1821	0.0178218	A0A4W8ZXM2;A0A0B4J1Y9	A0A4W8ZXM2;A0A0B4J1Y9		IGHV3-72	61	HP_5SX
1.39555	2.39471	-2.39471	0	1.69346				+	2	2	2	62	62	62	37294	0	13141	215320000	17	4	2.27748	0.00123077	A0A5F9ZHM4;P07195;F5H5G7;F5H155;A8MW50;A0A087WUM2;G3XAP5;A0A3B3IS95;F5H245;Q6ZMR3;P07864;P00338	A0A5F9ZHM4;P07195;F5H5G7;F5H155;A8MW50;A0A087WUM2;G3XAP5;A0A3B3IS95;F5H245;Q6ZMR3;P07864;P00338	L-lactate dehydrogenase B chain;L-lactate dehydrogenase;L-lactate dehydrogenase A-like 6A;L-lactate dehydrogenase C chain;L-lactate dehydrogenase A chain	LDHB;LDHC;LDHAL6A;LDHA	64	HP_MLPH;10SX_MLPH;EPC_MLPH
-3.28289	3.28289	0	0	-1.76992				+	4	4	4	97	97	97	50989	0	32502	569450000	21	22	2.97123	0.00041791	H9KV48;A0A7I2V2D2;E9PGN7;P05155;A0A7I2V5R3;A0A087WUD9	H9KV48;A0A7I2V2D2;E9PGN7;P05155;A0A7I2V5R3	Plasma protease C1 inhibitor	SERPING1	67	EPC_HP;EPC_10SX
-2.30637	2.30637	-1.56884	0	-1.64123				+	8	8	8	382	382	382	3067	0	1248	1105600000	15	25	2.58651	0.000526316	A0A7P0TAP4;A0A7P0Z441;A0A7P0T9S6;A0A7P0TA52;A0A7P0TBH1;A0A7P0T8D1;P01019	A0A7P0TAP4;A0A7P0Z441;A0A7P0T9S6;A0A7P0TA52;A0A7P0TBH1;A0A7P0T8D1;P01019	Angiotensinogen;Angiotensin-1;Angiotensin-2;Angiotensin-3;Angiotensin-4;Angiotensin 1-9;Angiotensin 1-7;Angiotensin 1-5;Angiotensin 1-4	AGT	71	EPC_HP;EPC_10SX;EPC_MLPH
1.35464	3.24638	-3.1052	-3.24638	-2.71952				+	3	3	3	74	74	74	49897	0	28507	949780000	26	12	4.20363	0	B4DNK4;H3BTN5;A0A804F6T5;A0A804F729;P14618;H3BT25;H3BUW1;H3BTJ2;H3BQ34;H3BU13;H3BR70;P30613	B4DNK4;H3BTN5;A0A804F6T5;A0A804F729;P14618;H3BT25;H3BUW1;H3BTJ2;H3BQ34	Pyruvate kinase;Pyruvate kinase PKM	PKM	73	HP_5SX;EPC_5SX;EPC_MLPH;EPC_10SX
9.84292	-9.74776	-9.84292	-8.57718	-8.72114				+	15	15	15	121	121	121	16574	0	32331	4224300000	61	155	10.8881	0	A1L4H1;M0QZ17	A1L4H1	Soluble scavenger receptor cysteine-rich domain-containing protein SSC5D	SSC5D	74	HP_MLPH;HP_EPC;HP_10SX;HP_5SX
4.9198	4.44146	-3.24354	-4.9198	-3.35122				+	4	4	4	118	118	118	33117	0	357	2602000000	14	138	6.20879	0	P02686;H0YF02;J3QQK6;H7BYR8;A8MZH3;J3QKL5;J3QL64;E9PMR5;H0YEA2;E9PJ72;E9PKX9;E9PNZ1;F8WEU6;F5H7N4;J3KT34;E9PLQ9;C9J6H1;J3KS94;E9PQE7;J3KT01;E9PSE2;E9PLU9	P02686;H0YF02;J3QQK6;H7BYR8;A8MZH3;J3QKL5;J3QL64;E9PMR5;H0YEA2;E9PJ72;E9PKX9;E9PNZ1;F8WEU6;F5H7N4;J3KT34	Myelin basic protein	MBP	76	EPC_5SX;HP_5SX;EPC_10SX;HP_10SX;EPC_MLPH;HP_MLPH
0	1.46298	-1.46298	0	0				+	6	6	6	576	576	576	10852	0	25138	1755500000000000	6	352	1.85838	0.00296629	P02656;B0YIW2;C9J2Q0	P02656;B0YIW2	Apolipoprotein C-III	APOC3	77	EPC_MLPH
-2.16834	3.44037	1.58828	2.43118	-3.44037				+	11	11	11	103	103	103	12402	0	74509	1003100000	58	41	3.81057	0	E7ETN3;B4E1Z4;P00751;H7C5H1;A0A0G2JH38;H7C526	E7ETN3;B4E1Z4;P00751;H7C5H1	Complement factor B;Complement factor B Ba fragment;Complement factor B Bb fragment	CFB	78	MLPH_10SX;5SX_10SX;EPC_10SX;5SX_HP;EPC_HP
0	1.9206	0	0	-1.9206				+	13	13	13	398	398	398	50322	0	16482	7443600000	26	117	1.95434	0.00243678	C9JEU5;C9JC84;P02679;C9JPQ9;C9JU00	C9JEU5;C9JC84;P02679	Fibrinogen gamma chain	FGG	82	EPC_10SX
-9.22945	-11.4726	11.4726	6.85349	-11.2362				+	7	7	7	265	265	265	24158	0	18923	32981000000	11	237	13.4361	0	C9JF17;P05090;C9JX71;F8WBT9	C9JF17;P05090	Apolipoprotein D	APOD	83	HP_EPC;5SX_EPC;MLPH_EPC;HP_10SX;5SX_10SX;MLPH_10SX;5SX_HP;MLPH_HP;MLPH_5SX
-11.4782	11.4782	11.4744	11.4782	11.4776				+	58	58	52	826	826	77	69366	0	32331	4528400000000000	37	2344	19.6176	0	CON__P02768-1;P02768;A0A0C4DGB6;B7WNR0;H0YA55;D6RHD5;A0A087WWT3;C9JKR2;H7C013	CON__P02768-1;P02768;A0A0C4DGB6;B7WNR0;H0YA55;D6RHD5;A0A087WWT3;C9JKR2	Serum albumin	ALB	89	MLPH_HP;10SX_HP;5SX_HP;EPC_HP;5SX_MLPH;EPC_MLPH;5SX_10SX;EPC_10SX;EPC_5SX
8.69255	8.57376	-6.45153	-8.69255	-6.14598				+	6	6	5	268	268	228	28036	0	86745	450130000	14	22	10.7116	0	E7EX29;P63104;E7ESK7;E5RGE1;E5RIR4;E9PD24;E7EVZ2;B0AZS6;B7Z2E6;H0YB80	E7EX29;P63104;E7ESK7;E5RGE1;E5RIR4;E9PD24;E7EVZ2;B0AZS6	14-3-3 protein zeta/delta	YWHAZ	103	EPC_5SX;HP_5SX;EPC_MLPH;HP_MLPH;EPC_10SX;HP_10SX
3.9107	-3.9107	-1.36999	-1.67383	0				+	7	7	7	41	41	41	20114	0	45529	741750000	85	48	3.36002	0.000133333	F5H7V9;E9PC84;J3QSU6;P24821;H0YGZ3	F5H7V9;E9PC84;J3QSU6;P24821	Tenascin	TNC	105	HP_EPC;HP_5SX;HP_MLPH
0	0	0	0	0				+	6	6	6	8	8	8	10882	0	48012	326070000	45	11	1.18169	0.0176471	E9PFZ2;P00450;H7C5R1;D6RE86;H7C5N5;CON__ENSEMBL:ENSBTAP00000031900	E9PFZ2;P00450;H7C5R1	Ceruloplasmin	CP	106
-1.70482	1.70482	0	-1.33407	-1.59962				+	6	6	6	151	151	151	65408	0	39139	356450000	30	13	2.09896	0.00207407	E9PIT3;P00734;C9JV37;CON__P00735	E9PIT3;P00734;C9JV37	Prothrombin;Activation peptide fragment 1;Activation peptide fragment 2;Thrombin light chain;Thrombin heavy chain	F2	107	EPC_10SX;EPC_HP;EPC_5SX
0	2.5912	-2.5912	0	0				+	6	6	5	134	134	113	68805	0	47416	507710000	32	22	2.4012	0.00103896	E9PKE3;P11142;E9PI65;E9PQQ4;E9PQK7;E9PK54;E9PLF4;E9PN89;E9PNE6;P54652;E9PN25;E9PPY6;E9PM13;E9PS65;A8K7Q2	E9PKE3;P11142;E9PI65;E9PQQ4;E9PQK7;E9PK54;E9PLF4;E9PN89;E9PNE6;P54652	Heat shock cognate 71 kDa protein;Heat shock-related 70 kDa protein 2	HSPA8;HSPA2	108	EPC_MLPH
3.09169	3.83308	-3.83308	0	1.35469				+	14	14	1	595	595	48	38975	0	1301	4737100000	20	178	3.76395	0	I3L4N8;P63261;A0A804GS07;A0A6Q8PFE4;I3L1U9;I3L3I0;J3KT65;K7EM38;I3L3R2;Q6S8J3;A5A3E0;A0A2R8YEA7;A0A2R8YFE2;P0CG38;Q9BYX7;A0A7P0TBL1;P0CG39;F8WCH0	I3L4N8;P63261;A0A804GS07;A0A6Q8PFE4;I3L1U9;I3L3I0	Actin, cytoplasmic 2;Actin, cytoplasmic 2, N-terminally processed	ACTG1	117	10SX_MLPH;HP_MLPH;EPC_MLPH
-6.32857	-7.37844	6.69656	7.37844	6.71775				+	7	7	7	358	358	358	19591	0	19076	14968000000	9	173	9.86106	0	J3KNB4;P49913	J3KNB4;P49913	Cathelicidin antimicrobial peptide;Antibacterial protein FALL-39;Antibacterial protein LL-37	CAMP	118	MLPH_EPC;10SX_EPC;5SX_EPC;MLPH_HP;10SX_HP;5SX_HP
2.18983	2.51064	-2.51064	-1.82488	0				+	4	4	4	16	16	16	39817	0	50895	543710000	21	28	3.17424	0.000253968	J3KPS3;P04075;H3BPS8;H3BQN4;H3BUH7;H3BR04;H3BR68;H3BMQ8;H3BU78	J3KPS3;P04075;H3BPS8;H3BQN4;H3BUH7;H3BR04	Fructose-bisphosphate aldolase;Fructose-bisphosphate aldolase A	ALDOA	119	HP_MLPH;EPC_MLPH;HP_5SX;EPC_5SX
0	2.68438	-2.86163	2.36911	2.86163				+	9	9	7	399	399	337	20049	0	32331	4092500000000000	6	584	3.2325	0.000196721	K7ER74;P02655;Q6P163;V9GYJ8;K7EMC3	K7ER74;P02655	Apolipoprotein C-II;Proapolipoprotein C-II	APOC4-APOC2;APOC2	120	EPC_MLPH;5SX_MLPH;10SX_MLPH
2.94107	-2.94107	1.66774	-2.27354	-2.18				+	10	10	10	241	241	241	43974	0	11428	10381000000	19	217	3.61547	0	O14791;B1AH96	O14791	Apolipoprotein L1	APOL1	121	MLPH_EPC;HP_EPC;HP_5SX;HP_10SX
8.10732	4.20752	-6.74013	-8.10732	-4.07097				+	18	18	18	588	588	588	38087	0	27456	48632000000	18	349	8.33563	0	O43866	O43866	CD5 antigen-like	CD5L	122	10SX_5SX;EPC_5SX;HP_5SX;EPC_MLPH;HP_MLPH;HP_10SX;HP_EPC
0	0	0	0	0					9	9	9	405	405	405	32903	0	11629	3262300000	15	98	0.778595	0.0546549	O75636	O75636	Ficolin-3	FCN3	124
-11.4544	11.4544	5.64175	5.82873	-9.13702				+	8	8	1	383	383	53	21253	0	68406	41672000000	10	274	12.3523	0	O95445	O95445	Apolipoprotein M	APOM	125	10SX_HP;MLPH_HP;5SX_HP;EPC_HP;MLPH_10SX;5SX_10SX;EPC_10SX;EPC_MLPH;EPC_5SX
10.19	-6.03878	-6.44574	-10.19	-7.08231				+	23	23	11	51	51	31	45205	0	30994	62753000000	20	552	9.8247	0	P00738;J3QR68;H0Y300;A0A0C4DGL8;J3QLC9;A0A087WU08;H3BS21;J3KTC3;J3KRH2;J3KSV1;J3QQI8;H3BMJ7	P00738;J3QR68;H0Y300;A0A0C4DGL8;J3QLC9;A0A087WU08	Haptoglobin;Haptoglobin alpha chain;Haptoglobin beta chain	HP	126	10SX_5SX;MLPH_5SX;EPC_5SX;HP_5SX;HP_10SX;HP_MLPH;HP_EPC
0	2.11163	-2.11163	0	1.86659				+	17	5	5	445	213	213	39029	0	35814	4911300000	20	37	2.09675	0.00204878	P00739;A0A0A0MRD9	P00739;A0A0A0MRD9	Haptoglobin-related protein	HPR	127	EPC_MLPH;10SX_MLPH
-3.56611	3.56611	-3.27813	1.7526	-3.36803				+	4	4	4	7	7	7	90568	0	25214	383750000	43	13	4.79072	0	P00747	P00747	Plasminogen;Plasmin heavy chain A;Activation peptide;Angiostatin;Plasmin heavy chain A, short form;Plasmin light chain B	PLG	128	5SX_10SX;EPC_10SX;5SX_HP;EPC_HP;5SX_MLPH;EPC_MLPH
-5.45537	5.45537	-2.15608	4.75147	1.79108				+	4	4	4	116	116	116	52602	0	2749	524780000	27	24	5.74879	0	P01008	P01008	Antithrombin-III	SERPINC1	130	10SX_HP;EPC_HP;5SX_HP;EPC_MLPH;5SX_MLPH
-2.5235	2.5235	-2.24779	0	0				+	5	5	5	113	113	113	4765	0	35169	1093500000	20	57	2.68676	0.000547945	P01011;G3V3A0;G3V595	P01011;G3V3A0	Alpha-1-antichymotrypsin;Alpha-1-antichymotrypsin His-Pro-less	SERPINA3	131	EPC_HP;EPC_MLPH
-4.56122	7.54534	2.96301	4.79361	-7.54534				+	42	42	42	35	35	35	16329	0	32331	20075000000	69	385	7.4422	0	P01023;P20742;H0YFH1;F8W7L3;CON__ENSEMBL:ENSBTAP00000024146	P01023	Alpha-2-macroglobulin	A2M	132	MLPH_10SX;5SX_10SX;EPC_10SX;5SX_HP;EPC_HP;EPC_MLPH
-6.02493	7.19642	-5.2904	5.08568	-7.19642				+	78	78	69	509	509	469	18715	0	32331	45744000000	95	923	8.49626	0	P01024;M0QYC8;M0QXZ3;M0R0Q9;M0R1Q1;O95568	P01024	Complement C3;Complement C3 beta chain;C3-beta-c;Complement C3 alpha chain;C3a anaphylatoxin;Acylation stimulating protein;Complement C3b alpha chain;Complement C3c alpha chain fragment 1;Complement C3dg fragment;Complement C3g fragment;Complement C3d fragment;Complement C3f fragment;Complement C3c alpha chain fragment 2	C3	133	5SX_10SX;EPC_10SX;5SX_HP;EPC_HP;5SX_MLPH;EPC_MLPH
-1.70246	2.32096	-2.20046	0	-2.32096				+	11	11	11	228	228	228	71957	0	10626	2285600000	35	24	2.7379	0.000555556	P01042	P01042	Kininogen-1;Kininogen-1 heavy chain;T-kinin;Bradykinin;Lysyl-bradykinin;Kininogen-1 light chain;Low molecular weight growth-promoting factor	KNG1	135	EPC_10SX;EPC_MLPH;EPC_HP
3.92638	3.64333	-3.92638	-2.90371	0				+	7	7	7	421	421	421	18098	0	58157	37103000000	8	121	4.88104	0	P01591;D6RD17;D6RHJ6;C9JA05	P01591;D6RD17;D6RHJ6	Immunoglobulin J chain	IGJ;JCHAIN	136	EPC_MLPH;HP_MLPH;EPC_5SX;HP_5SX
0	0	0	0	0				+	3	3	2	405	405	267	12557	0	36767	5446600000	5	31	1.04596	0.0244112	P01619	P01619	Ig kappa chain V-III region B6		140
-1.76144	1.49212	-1.74684	1.76144	0				+	2	2	1	261	261	78	12496	0	1348	1866500000	3	19	2.85255	0.000405797	P01624;A0A0C4DH90;A0A075B6H7;A0A0C4DH55	P01624;A0A0C4DH90;A0A075B6H7;A0A0C4DH55	Ig kappa chain V-III region POM	IGKV3OR2-268;IGKV3-7;IGKV3D-7	141	EPC_MLPH;5SX_MLPH;EPC_HP;5SX_HP
0	0	0	0	0					2	2	2	248	248	248	12283	0	1701	1170800000	4	18	0.1519	0.513479	P01700;P01699	P01700;P01699	Ig lambda chain V-I region HA;Ig lambda chain V-I region VOR		142
5.58979	-5.58979	-2.36832	-5.12697	-5.32613				+	2	2	2	11	11	11	12382	0	25105	801060000	2	11	6.27223	0	P01709;P01706	P01709;P01706	Ig lambda chain V-II region MGC;Ig lambda chain V-II region BOH		144	HP_10SX;HP_5SX;HP_EPC;HP_MLPH
1.35579	0	0	-1.35579	0				+	2	1	1	188	98	98	12011	0	19361	1097800000	3	53	1.11367	0.0210385	P01717;A0A075B6K0;P01718	P01717;A0A075B6K0;P01718	Ig lambda chain V-IV region Hil;Ig lambda chain V-IV region Kern	IGLV3-16	146	HP_5SX
0	1.35026	-1.70394	1.50196	1.70394				+	3	2	1	265	171	77	12943	0	1285	4962600000	5	35	1.78221	0.00365591	P01780;A0A0B4J1V1;P01763;P01762;A0A075B7F0;P01766	P01780;A0A0B4J1V1;P01763;P01762	Ig heavy chain V-III region JON;Ig heavy chain V-III region WEA;Ig heavy chain V-III region TRO	IGHV3-21	147	EPC_MLPH;5SX_MLPH;10SX_MLPH
4.31537	2.14102	-4.31537	1.65464	3.44352				+	8	8	8	822	822	822	11765	0	32331	98209000000	5	408	4.1551	0	P01834;A0A5H1ZRQ3	P01834;A0A5H1ZRQ3	Ig kappa chain C region	IGKC	149	5SX_MLPH;EPC_MLPH;10SX_MLPH;HP_MLPH
5.85766	6.74006	-6.74006	-3.66875	3.21874				+	31	31	31	653	653	653	49439	0	32331	6628800000000000	25	1494	7.19214	0	P01871	P01871	Ig mu chain C region	IGHM	150	10SX_MLPH;HP_MLPH;EPC_MLPH;HP_5SX;EPC_5SX
3.26287	2.79385	-3.26287	0	2.1117				+	27	27	27	753	753	753	30777	0	32331	87275000000	18	714	3.21114	0.000258065	P02647;F8W696	P02647;F8W696	Apolipoprotein A-I;Proapolipoprotein A-I;Truncated apolipoprotein A-I	APOA1	151	10SX_MLPH;EPC_MLPH;HP_MLPH
9.94878	8.42331	-9.94878	-7.49376	-6.22664				+	33	33	33	785	785	785	36154	0	32331	3703600000000000	22	1428	11.0145	0	P02649;H0Y7L5;E9PEV4;E7ERP7;CON__Q03247	P02649;H0Y7L5;E9PEV4;E7ERP7	Apolipoprotein E	APOE	152	10SX_MLPH;EPC_MLPH;HP_MLPH;EPC_5SX;HP_5SX;EPC_10SX;HP_10SX
1.40855	0	-1.40855	0	0				+	6	6	6	495	495	495	10649	0	94981	21943000000	5	205	1.07582	0.0227547	V9GYG9;V9GYM3;P02652;V9GYE3;V9GYC1;V9GYS1	V9GYG9;V9GYM3;P02652;V9GYE3;V9GYC1;V9GYS1	Apolipoprotein A-II;Proapolipoprotein A-II;Truncated apolipoprotein A-II	APOA2	153	HP_MLPH
-7.34271	-9.57233	-6.26946	6.80835	9.57233				+	9	9	9	542	542	542	93318	0	82991	1669900000000000	3	759	10.1776	0	P02654;K7ERI9;K7EJI9;K7ELM9;K7EPF9;K7EKP1	P02654;K7ERI9;K7EJI9;K7ELM9;K7EPF9	Apolipoprotein C-I;Truncated apolipoprotein C-I	APOC1	154	5SX_EPC;10SX_EPC;5SX_HP;10SX_HP;5SX_MLPH;10SX_MLPH
2.59503	3.06291	2.00199	0	-3.06291				+	21	21	21	311	311	311	94972	0	23599	8528000000	35	172	3.37768	0.000135593	P02671;A0A087WUA0	P02671	Fibrinogen alpha chain;Fibrinopeptide A;Fibrinogen alpha chain	FGA	155	MLPH_10SX;HP_10SX;EPC_10SX
0	0	0	0	0					13	13	13	34	34	34	55928	0	10359	4836100000	29	68	0.581184	0.109719	P02675;D6REL8;CON__P02676	P02675;D6REL8	Fibrinogen beta chain;Fibrinopeptide B;Fibrinogen beta chain	FGB	156
-3.74833	3.33024	-3.99773	3.99773	-1.5794				+	5	5	5	253	253	253	25773	0	40975	1721200000	13	58	5.21428	0	P02747	P02747	Complement C1q subcomponent subunit C	C1QC	158	EPC_MLPH;5SX_MLPH;EPC_HP;5SX_HP;5SX_10SX
-3.70481	-2.08849	2.16789	3.70481	2.69279				+	7	7	7	243	243	243	38298	0	50793	3018900000	17	46	4.09814	0	P02749;J3QRN2;J3QLI0;J3KS17	P02749;J3QRN2	Beta-2-glycoprotein 1	APOH	159	MLPH_HP;10SX_HP;5SX_HP;5SX_EPC
0	0	0	0	0					8	8	8	39	39	39	27232	0	72284	945190000	96	60	0.464558	0.166122	P02751;H0Y7Z1	P02751	Fibronectin;Anastellin;Ugl-Y1;Ugl-Y2;Ugl-Y3	FN1	160
-2.39928	5.17062	-5.17062	-3.68211	-4.9411				+	4	4	4	165	165	165	38999	0	29782	654400000	16	25	5.87563	0	P02760;S4R471	P02760;S4R471	Protein AMBP;Alpha-1-microglobulin;Inter-alpha-trypsin inhibitor light chain;Trypstatin	AMBP	161	EPC_MLPH;EPC_10SX;EPC_5SX;EPC_HP
-3.56477	4.22712	4.14385	-1.79921	-4.22712				+	3	3	3	119	119	119	23511	0	24023	255280000	10	8	5.72148	0	P02763	P02763	Alpha-1-acid glycoprotein 1	ORM1	162	EPC_10SX;MLPH_10SX;EPC_HP;MLPH_HP;EPC_5SX;MLPH_5SX
-1.41501	2.32143	-2.32143	1.60466	2.18588				+	4	4	4	356	356	356	10845	0	66214	900980000	4	34	3.09024	0.000307692	P02776;P10720	P02776;P10720	Platelet factor 4;Platelet factor 4, short form;Platelet factor 4 variant;Platelet factor 4 variant(4-74);Platelet factor 4 variant(5-74);Platelet factor 4 variant(6-74)	PF4;PF4V1	163	5SX_MLPH;EPC_MLPH;10SX_MLPH;EPC_HP;10SX_HP
-7.04148	6.0777	7.04148	4.34846	-2.86864				+	32	32	32	467	467	467	77063	0	32331	17328000000	40	372	7.27024	0	P02787;H7C5E8;F8WEK9;F8WCI6;C9JB55;C9JVG0;F8WC57	P02787	Serotransferrin	TF	164	10SX_HP;5SX_HP;EPC_HP;MLPH_HP;EPC_10SX;MLPH_10SX
-5.65764	5.65764	-2.99105	3.93209	2.09433				+	8	8	8	223	223	223	51676	0	63724	1934400000	22	76	5.73274	0	P02790;Q9BS19	P02790;Q9BS19	Hemopexin	HPX	165	10SX_HP;5SX_HP;EPC_HP;5SX_MLPH;EPC_MLPH
-4.01881	-1.3125	4.01881	-1.52814	0				+	25	25	25	561	561	561	67033	0	29558	69998000000	30	450	3.4366	0.000137931	P04003;A6PVY5;F2Z2V7	P04003	C4b-binding protein alpha chain	C4BPA	167	MLPH_HP;MLPH_5SX;MLPH_EPC
0	0	0	0	0				+	6	6	6	165	165	165	54305	0	477	890560000	19	53	1.27555	0.014125	P04004;CON__Q3ZBS7	P04004	Vitronectin;Vitronectin V65 subunit;Vitronectin V10 subunit;Somatomedin-B	VTN	168
-3.64181	5.88608	-5.88608	2.6869	3.72419				+	240	240	240	551	551	551	5156	0	32331	7826800000000000	250	5406	5.97753	0	P04114;A8MUN2;A0A669KB70;CON__ENSEMBL:ENSBTAP00000032840	P04114	Apolipoprotein B-100;Apolipoprotein B-48	APOB	169	5SX_MLPH;10SX_MLPH;EPC_MLPH;10SX_HP;EPC_HP
0	0	0	0	0				+	5	5	5	103	103	103	59578	0	12547	1274400000	22	44	1.3261	0.0120842	P04196	P04196	Histidine-rich glycoprotein	HRG	170
0	0	0	0	0					3	3	3	214	214	214	12451	0	17601	761180000	4	22	0.334053	0.263897	P04211;A0A075B6I9	P04211;A0A075B6I9	Ig lambda chain V region 4A	IGLV7-46	171
5.58367	4.07392	-5.58367	-4.16353	-3.94628				+	100	100	100	426	426	426	30926	0	32331	3811300000000000	132	3174	6.5643	0	P04275	P04275	von Willebrand factor;von Willebrand antigen 2	VWF	173	EPC_MLPH;HP_MLPH;EPC_5SX;HP_5SX;EPC_10SX;HP_10SX
1.62899	4.25783	-4.25783	0	-2.77556				+	6	6	6	245	245	245	36053	0	11403	1083100000	17	15	4.14724	0	P04406;E7EUT5;O14556	P04406;E7EUT5	Glyceraldehyde-3-phosphate dehydrogenase	GAPDH	175	HP_MLPH;EPC_MLPH;EPC_10SX
-4.18923	5.91927	-5.1542	1.74439	-5.91927				+	3	3	3	54	54	54	5707	0	20321	257650000	26	16	6.48126	0	P05546	P05546	Heparin cofactor 2	SERPIND1	178	5SX_10SX;EPC_10SX;EPC_MLPH;EPC_HP;EPC_5SX
0	1.31431	-1.31431	0	0				+	3	3	3	298	298	298	1338	0	20445	1621700000	4	22	1.14678	0.0194563	P06312	P06312	Ig kappa chain V-IV region	IGKV4-1	179	EPC_MLPH
0	1.70871	-1.70871	0	0				+	9	9	9	251	251	251	56559	0	10267	531150000	29	34	1.58954	0.00659574	P06576;H0YH81;F8W079;F8W0P7;H0YI37	P06576;H0YH81;F8W079	ATP synthase subunit beta, mitochondrial;ATP synthase subunit beta	ATP5B	180	EPC_MLPH
7.48118	-5.3791	-3.41591	-7.48118	-6.89488				+	20	20	19	427	427	399	45371	0	1554	4639500000	25	166	7.8621	0	P06727	P06727	Apolipoprotein A-IV	APOA4	181	MLPH_5SX;HP_5SX;HP_10SX;HP_EPC;HP_MLPH
1.50146	0	-1.50146	0	1.33259				+	7	7	7	66	66	66	12938	0	52924	1609800000	61	53	2.01189	0.00237209	P07996;CON__Q28194;A8MZG1;A0A7I2YQ86;A0A7I2V585;A0A7I2YQT6;A0A3B3ITK0;P35442	P07996;CON__Q28194	Thrombospondin-1	THBS1	183	10SX_MLPH;HP_MLPH
-6.01932	7.43591	-5.13212	-7.43591	-6.36204				+	33	33	33	449	449	449	50131	0	32331	42562000000	172	493	8.18845	0	P08519;A0A087WWY0;Q16609	P08519	Apolipoprotein(a)	LPA	186	EPC_5SX;EPC_10SX;EPC_HP;EPC_MLPH
-1.61732	4.36583	-4.36583	-1.96467	-1.38184				+	13	13	12	376	376	356	53651	0	98837	964940000	32	60	3.93267	0	P08670;B0YJC4;B0YJC5;A0A1B0GTT5;A0A1B0GVG8;P17661	P08670;B0YJC4;B0YJC5	Vimentin	VIM	187	EPC_MLPH;EPC_5SX;EPC_HP;EPC_10SX
0	1.38422	-1.47344	0	1.47344				+	3	3	3	88	88	88	47578	0	2505	205060000	28	10	1.88513	0.00295455	P09543;K7ERC4	P09543	2,3-cyclic-nucleotide 3-phosphodiesterase	CNP	189	EPC_MLPH;10SX_MLPH
3.5528	0	-3.18432	-2.63588	-3.5528				+	8	3	3	915	34	34	11293	0	27977	2365600000	7	28	3.96066	0	P0DOY2;P0DOY3;P0CF74;A0A5H1ZRQ7;A0M8Q6	P0DOY2;P0DOY3;P0CF74	Ig lambda-6 chain C region	IGLC6	190	HP_10SX;HP_MLPH;HP_5SX
3.56471	5.32414	-5.32414	-3.72395	-4.10677				+	12	12	12	276	276	276	52494	0	10809	7786700000	19	113	6.32937	0	P10909;H0YLK8;E7ERK6;H0YC35;E7ETB4;E5RG36;E5RGB0;E5RH61;E5RJZ5;H0YAS8	P10909;H0YLK8;E7ERK6;H0YC35	Clusterin;Clusterin beta chain;Clusterin alpha chain;Clusterin	CLU	192	HP_MLPH;EPC_MLPH;HP_10SX;EPC_10SX;HP_5SX;EPC_5SX
0	2.18052	0	0	-2.18052				+	5	5	1	226	226	43	22885	0	31787	569050000	15	24	2.05337	0.00231325	V9GYG0;P12235;P05141;Q9H0C2	V9GYG0;P12235;P05141;Q9H0C2	ADP/ATP translocase 1;ADP/ATP translocase 2;ADP/ATP translocase 2, N-terminally processed;ADP/ATP translocase 4;ADP/ATP translocase 4, N-terminally processed	SLC25A4;SLC25A5;SLC25A31	194	EPC_10SX
0	1.84842	0	1.70326	-1.84842				+	15	15	15	176	176	176	10521	0	16818	1710800000	47	84	2.10719	0.00205	Q5T985;P19823;Q5T987;CON__Q9TRI1	Q5T985;P19823	Inter-alpha-trypsin inhibitor heavy chain H2	ITIH2	202	EPC_10SX;5SX_10SX
0	1.9568	0	1.37704	-1.9568				+	8	8	8	115	115	115	10139	0	59904	712560000	33	14	2.23979	0.00141772	P19827;F8WAS2;CON__Q0VCM5;H7C5I0;H7C0N0	P19827	Inter-alpha-trypsin inhibitor heavy chain H1	ITIH1	203	5SX_10SX;EPC_10SX
2.59026	-4.01721	4.01721	-2.54199	0				+	6	6	6	274	274	274	28357	0	75595	18079000000	14	99	4.2278	0	P20851;Q5VVQ7	P20851	C4b-binding protein beta chain	C4BPB	204	HP_EPC;MLPH_EPC;MLPH_5SX
0	2.77269	-2.77269	-1.64735	-2.12918				+	7	7	7	161	161	161	5975	0	71266	484020000	31	33	2.96625	0.000411765	P25705;K7ERX7;K7EK77;K7EQH4;K7EJP1;K7ESA0;K7ENJ4	P25705;K7ERX7;K7EK77;K7EQH4;K7EJP1	ATP synthase subunit alpha, mitochondrial	ATP5A1	206	EPC_MLPH;EPC_10SX;EPC_5SX
-11.4777	11.4777	-11.3962	-11.1692	-11.4654				+	10	10	10	42	42	42	39731	0	311	21772000000	15	125	15.3663	0	P27169;F8WF42	P27169	Serum paraoxonase/arylesterase 1	PON1	207	5SX_HP;EPC_HP;EPC_10SX;EPC_MLPH;EPC_5SX
2.10215	3.49192	-3.49192	-3.2424	-2.81614				+	6	6	6	228	228	228	35503	0	57648	454790000	20	13	4.69532	0	P40926;G3XAL0	P40926;G3XAL0	Malate dehydrogenase, mitochondrial;Malate dehydrogenase	MDH2	210	HP_MLPH;EPC_MLPH;HP_5SX;EPC_5SX;HP_10SX;EPC_10SX
-1.70466	0	-1.55302	0	1.70466				+	5	3	3	244	157	157	14553	0	31613	4882400000	6	70	1.84035	0.00311111	P55056	P55056	Apolipoprotein C-IV	APOC4	213	10SX_HP;10SX_MLPH
-1.579	3.40662	-3.40662	0	0				+	6	6	6	238	238	238	30077	0	71937	2463500000	10	60	3.033	0.000363636	P60201;B1B1G3;B1B1G4;B1B1G6;B1B1G1;B1B1G2	P60201	Myelin proteolipid protein	PLP1	214	EPC_MLPH;EPC_HP
1.30567	4.17826	-4.17826	-2.81443	1.70006				+	5	5	5	505	505	505	11367	0	34339	1132400000	6	53	4.15651	0	P62805	P62805	Histone H4	HIST1H4A	219	HP_MLPH;10SX_MLPH;EPC_MLPH;EPC_5SX
2.66119	1.36592	-2.66119	-1.82579	0				+	3	3	3	97	97	97	37377	0	18687	130170000	13	12	2.79986	0.000450704	P62873;C9JIS1;A0A7I2S2S9;A0A6Q8PFV8;A0A6Q8PFE0;A0A6Q8PG88;E7EP32;B1AKQ8;C9JXA5;A0A6Q8PFW8;H7C5J5;F6UT28;F6X3N5;C9JZN1;P62879;Q9HAV0;B3KVK2;F5H100;F5H8J8;F5H0S8;P16520;E9PCP0;C9JD14	P62873;C9JIS1;A0A7I2S2S9;A0A6Q8PFV8;A0A6Q8PFE0;A0A6Q8PG88;E7EP32;B1AKQ8;C9JXA5;A0A6Q8PFW8;H7C5J5;F6UT28;F6X3N5;C9JZN1;P62879;Q9HAV0	Guanine nucleotide-binding protein G(I)/G(S)/G(T) subunit beta-1;Guanine nucleotide-binding protein G(I)/G(S)/G(T) subunit beta-2;Guanine nucleotide-binding protein subunit beta-4	GNB1;GNB2;GNB4	220	EPC_MLPH;HP_MLPH;HP_5SX
1.88589	5.24607	-5.24607	-2.02387	-1.48041				+	12	12	0	355	355	0	50151	0	15637	2780900000	21	76	4.64874	0	P68363	P68363	Tubulin alpha-1B chain	TUBA1B	222	10SX_MLPH;HP_MLPH;EPC_MLPH;EPC_5SX;EPC_10SX
0	0	0	0	0				+	11	3	3	312	76	76	49924	0	19914	186850000	21	11	0.981943	0.0288889	P68366;C9JEV8;C9JQ00;C9JJQ8;C9JDL2	P68366	Tubulin alpha-4A chain	TUBA4A	223
1.66444	4.95612	-4.95612	-2.12209	1.641				+	17	17	1	53	53	27	4983	0	32331	2917800000	19	121	4.42231	0	P68371;Q3ZCM7;M0R2D3;M0R042;M0QYM7;M0R2T4;A0A075B724	P68371	Tubulin beta-4B chain	TUBB4B	224	HP_MLPH;10SX_MLPH;EPC_MLPH;EPC_5SX
0	0	0	0	0				+	10	10	10	857	857	857	15998	0	11731	8838100000	11	159	1.23129	0.016	P68871;A0A2R8Y7R2;F8W6P5;P02042;E9PFT6;E9PEW8;A0A0J9YWK4;CON__Q3SX09;C9JRG0;CON__P02070;A0A2R8Y7X9;P69892;P69891;P02100	P68871;A0A2R8Y7R2;F8W6P5;P02042	Hemoglobin subunit beta;LVV-hemorphin-7;Spinorphin;Hemoglobin subunit delta	HBB;HBD	225
0	0	0	0	0					6	6	4	521	521	394	15257	0	17031	5728300000	8	143	0.808035	0.0502857	P69905;A0A2R8Y7C0;G3V1N2	P69905;A0A2R8Y7C0;G3V1N2	Hemoglobin subunit alpha	HBA1;HBA2	226
5.88683	-4.43495	-4.79341	-5.88683	-3.76765				+	15	15	15	274	274	274	6533	0	1927	21315000000	26	339	6.06271	0	Q08380;K7EP36;K7ESM3;K7EKQ5;K7EJY8;K7ES75;K7EN99;K7ERZ6;K7EJD3	Q08380	Galectin-3-binding protein	LGALS3BP	227	HP_5SX;HP_MLPH;HP_EPC;HP_10SX
-9.11073	9.11073	4.97044	7.10444	5.18716				+	4	4	4	23	23	23	35399	0	11142	26018000000	13	48	8.79153	0	Q13790	Q13790	Apolipoprotein F	APOF	229	MLPH_HP;10SX_HP;5SX_HP;EPC_HP;EPC_MLPH
0	2.18952	0	2.08005	-2.18952				+	10	10	10	113	113	113	10336	0	88549	767270000	44	40	2.59389	0.000533333	Q14624;B7ZKJ8;H7C0L5;CON__Q3T052	Q14624;B7ZKJ8;H7C0L5	Inter-alpha-trypsin inhibitor heavy chain H4;70 kDa inter-alpha-trypsin inhibitor heavy chain H4;35 kDa inter-alpha-trypsin inhibitor heavy chain H4	ITIH4	231	EPC_10SX;5SX_10SX
-1.96747	0	1.96747	1.63457	0				+	9	9	9	294	294	294	34001	0	18567	3670500000	14	96	2.05221	0.00228571	Q15485	Q15485	Ficolin-2	FCN2	232	5SX_HP;MLPH_HP
1.52683	2.7462	-3.2091	2.95361	3.2091				+	3	3	3	92	92	92	28665	0	31152	230140000	11	15	3.44891	0.000140351	Q9BWP8	Q9BWP8	Collectin-11	COLEC11	239	HP_MLPH;EPC_MLPH;5SX_MLPH;10SX_MLPH

## Sheet: HP - MLPH
Significant	-log(P - value)	Difference	Protein IDs	Majority protein IDs	Protein names	Gene names	id	Symbol color	Symbol type	Symbol size	Show label	Only identified by site	Reverse	Potential contaminant	ANOVA Significant	Peptides	Razor + unique peptides	Unique peptides	Sequence coverage [%]	Unique + razor sequence coverage [%]	Unique sequence coverage [%]	Mol. weight [kDa]	Q-value	Score	Intensity	iBAQ peptides	MS/MS count	#NAME?	ANOVA q-value	LFQ intensity 01	LFQ intensity 01_211116203409	LFQ intensity 01_211116221134	LFQ intensity 02	LFQ intensity 02_211117012617	LFQ intensity 02_211117030340	LFQ intensity 02_211117044104	LFQ intensity 03	LFQ intensity 03_211117075550	LFQ intensity 03_211117093314	LFQ intensity 04	LFQ intensity 04_211117124800	LFQ intensity 04_211117142524	LFQ intensity 05	LFQ intensity 05_211117174036	LFQ intensity 05_211117191758	LFQ intensity 18	LFQ intensity 18_211120085806	LFQ intensity 18_211120103530	LFQ intensity 19
+	8.23029	0.79892	A1L4H1;M0QZ17	A1L4H1	Soluble scavenger receptor cysteine-rich domain-containing protein SSC5D	SSC5D	74	Color2 [DarkGray]	1	4					+	15	15	15	121	121	121	16574	0	32331	4224300000	61	155	10.8881	0	0.11332	0.233953	0.0847153	0.225833	0.014313	0.209275	0.204388	-0.55017	-0.777155	-0.83432	-0.260354	-0.364232	-0.488485	-0.792438	-0.484366	-0.503175	-0.494844	-0.58244	-0.62509	-0.687207
+	8.11613	-0.914729	CON__P02768-1;P02768;A0A0C4DGB6;B7WNR0;H0YA55;D6RHD5;A0A087WWT3;C9JKR2;H7C013	CON__P02768-1;P02768;A0A0C4DGB6;B7WNR0;H0YA55;D6RHD5;A0A087WWT3;C9JKR2	Serum albumin	ALB	89	Color2 [DarkGray]	1	4					+	58	58	52	826	826	77	69366	0	32331	4528400000000000	37	2344	19.6176	0	0.683351	0.766927	0.774505	0.573375	0.648769	0.658416	0.627927	2.09384	2.1467	2.17945	1.96707	1.96132	2.04505	2.24387	2.25635	2.28372	1.73695	1.66308	1.59088	1.46105
+	7.7519	-0.720216	C9JF17;P05090;C9JX71;F8WBT9	C9JF17;P05090	Apolipoprotein D	APOD	83	Color2 [DarkGray]	1	4					+	7	7	7	265	265	265	24158	0	18923	32981000000	11	237	13.4361	0	0.435938	0.483329	0.390839	0.64187	0.685716	0.640997	0.542487	0.211444	-0.0166452	0.00212351	0.465874	0.452863	0.407067	0.107279	0.48225	0.19458	1.33276	1.26521	1.2439	1.2855
+	6.58621	0.450695	P00738;J3QR68;H0Y300;A0A0C4DGL8;J3QLC9;A0A087WU08;H3BS21;J3KTC3;J3KRH2;J3KSV1;J3QQI8;H3BMJ7	P00738;J3QR68;H0Y300;A0A0C4DGL8;J3QLC9;A0A087WU08	Haptoglobin;Haptoglobin alpha chain;Haptoglobin beta chain	HP	126	Color2 [DarkGray]	1	4					+	23	23	11	51	51	31	45205	0	30994	62753000000	20	552	9.8247	0	1.2731	1.32705	1.25496	1.2244	1.22388	1.26416	1.4014	0.92313	0.777378	0.800889	1.26551	1.02633	1.00438	0.675526	0.807583	0.754549	0.82692	0.820896	0.799308	0.91806
+	6.17151	0.48187	Q9Y6R7;A0A087WXI2;A0A087WUZ2	Q9Y6R7;A0A087WXI2	IgGFc-binding protein	FCGBP	12	Color2 [DarkGray]	1	4					+	34	34	34	134	134	134	57201	0	2964	8130500000	163	293	4.5562	0	0.204078	0.301578	0.215071	0.134405	0.178719	0.203242	0.0937283	-0.197017	-0.309379	-0.325839	0.0389155	-0.00529838	-0.004549	-0.809861	-0.587305	-0.81174	-0.17877	-0.199229	-0.301927	-0.442821
+	5.86273	-0.962466	O95445	O95445	Apolipoprotein M	APOM	125	Color2 [DarkGray]	1	4					+	8	8	1	383	383	53	21253	0	68406	41672000000	10	274	12.3523	0	0.24709	-0.0407666	0.24218	-0.0887486	0.18477	-0.0737901	0.361625	2.09462	2.15639	2.14708	1.85647	1.30207	1.25468	2.24718	2.10966	2.33743	0.802951	1.19623	1.19023	0.912241
+	5.06206	-1.44828	Q13790	Q13790	Apolipoprotein F	APOF	229	Color2 [DarkGray]	1	4					+	4	4	4	23	23	23	35399	0	11142	26018000000	13	48	8.79153	0	-0.616649	-0.56289	-0.52644	-1.25147	-0.719361	-0.521791	-0.623477	1.30996	1.93865	1.90868	0.0670965	0.90387	1.06108	1.85444	1.98238	1.90341	0.88744	1.02602	1.21234	0.259385
+	4.87334	0.517968	P02649;H0Y7L5;E9PEV4;E7ERP7;CON__Q03247	P02649;H0Y7L5;E9PEV4;E7ERP7	Apolipoprotein E	APOE	152	Color2 [DarkGray]	1	4					+	33	33	33	785	785	785	36154	0	32331	3703600000000000	22	1428	11.0145	0	2.18696	2.18487	2.21747	1.88103	1.87893	1.88486	2.03509	1.95048	1.92681	1.98758	2.02561	1.89853	1.90332	1.86436	1.96856	1.93562	1.60013	1.59258	1.54039	1.44219
+	4.8545	0.961815	E7EX29;P63104;E7ESK7;E5RGE1;E5RIR4;E9PD24;E7EVZ2;B0AZS6;B7Z2E6;H0YB80	E7EX29;P63104;E7ESK7;E5RGE1;E5RIR4;E9PD24;E7EVZ2;B0AZS6	14-3-3 protein zeta/delta	YWHAZ	103	Color2 [DarkGray]	1	4					+	6	6	5	268	268	228	28036	0	86745	450130000	14	22	10.7116	0	-0.656618	-0.627886	-0.830266	-0.947952	-0.951876	-1.08421	-0.710363	-1.11445	-0.866123	-0.818103	-0.845949	-1.01991	-0.844519	-0.707141	-0.98085	-0.986582	-1.77679	-1.34132	-1.56916	-1.99433
+	4.83286	0.306695	P04196	P04196	Histidine-rich glycoprotein	HRG	170	Color2 [DarkGray]	1	4					+	5	5	5	103	103	103	59578	0	12547	1274400000	22	44	1.3261	0.0120842	-0.459009	-0.303553	-0.399777	-0.483603	-0.458443	-0.265158	-0.419849	-0.0750961	-0.326877	-0.347157	-0.408768	-0.469445	-0.680718	-0.939216	-0.235099	-0.505454	-0.659241	-0.636827	-0.662828	-0.801611
+	4.42048	0.493486	O43866	O43866	CD5 antigen-like	CD5L	122	Color2 [DarkGray]	1	4					+	18	18	18	588	588	588	38087	0	27456	48632000000	18	349	8.33563	0	1.51387	1.47717	1.50795	1.33735	1.52112	1.54269	1.09993	1.18959	1.27372	1.24731	1.27844	1.34211	1.32183	1.00037	0.982201	1.054	1.00597	1.01406	0.949141	0.764412
+	3.99641	-0.630525	P02763	P02763	Alpha-1-acid glycoprotein 1	ORM1	162	Color2 [DarkGray]	1	4					+	3	3	3	119	119	119	23511	0	24023	255280000	10	8	5.72148	0	-1.84147	-1.50017	-1.66994	-1.68354	-2.15475	-1.5924	-2.07121	-0.8735	-1.72149	-1.17028	-1.14228	-1.0894	-1.15268	-1.32695	-1.2547	-1.17432	-1.23828	-1.10071	-1.01594	-1.25347
+	3.63134	0.473112	P04275	P04275	von Willebrand factor;von Willebrand antigen 2	VWF	173	Color2 [DarkGray]	1	4					+	100	100	100	426	426	426	30926	0	32331	3811300000000000	132	3174	6.5643	0	1.96376	1.96939	1.95818	1.49322	1.55468	1.60175	1.66334	1.62427	1.52903	1.55097	1.63179	1.50742	1.51097	1.75426	1.79448	1.78692	1.30449	1.32291	1.26794	1.26002
+	3.60774	0.57165	Q08380;K7EP36;K7ESM3;K7EKQ5;K7EJY8;K7ES75;K7EN99;K7ERZ6;K7EJD3	Q08380	Galectin-3-binding protein	LGALS3BP	227	Color2 [DarkGray]	1	4					+	15	15	15	274	274	274	6533	0	1927	21315000000	26	339	6.06271	0	1.10914	1.00865	1.13647	0.771648	0.740234	0.659782	0.895538	0.56088	0.349075	0.34932	0.674214	0.654858	0.580881	0.0486632	0.332848	0.152523	0.454279	0.494231	0.459008	0.0496329
+	3.60238	0.681383	P62873;C9JIS1;A0A7I2S2S9;A0A6Q8PFV8;A0A6Q8PFE0;A0A6Q8PG88;E7EP32;B1AKQ8;C9JXA5;A0A6Q8PFW8;H7C5J5;F6UT28;F6X3N5;C9JZN1;P62879;Q9HAV0;B3KVK2;F5H100;F5H8J8;F5H0S8;P16520;E9PCP0;C9JD14	P62873;C9JIS1;A0A7I2S2S9;A0A6Q8PFV8;A0A6Q8PFE0;A0A6Q8PG88;E7EP32;B1AKQ8;C9JXA5;A0A6Q8PFW8;H7C5J5;F6UT28;F6X3N5;C9JZN1;P62879;Q9HAV0	Guanine nucleotide-binding protein G(I)/G(S)/G(T) subunit beta-1;Guanine nucleotide-binding protein G(I)/G(S)/G(T) subunit beta-2;Guanine nucleotide-binding protein subunit beta-4	GNB1;GNB2;GNB4	220	Color2 [DarkGray]	1	4					+	3	3	3	97	97	97	37377	0	18687	130170000	13	12	2.79986	0.000450704	-1.17002	-1.06925	-1.1578	-1.79143	-1.30328	-1.2335	-1.278	-1.80744	-1.30629	-1.30469	-1.49652	-1.73478	-1.00285	-1.22454	-1.79018	-1.89727	-1.60897	-2.16874	-1.92162	-1.82798
+	3.53286	-1.09549	P02787;H7C5E8;F8WEK9;F8WCI6;C9JB55;C9JVG0;F8WC57	P02787	Serotransferrin	TF	164	Color2 [DarkGray]	1	4					+	32	32	32	467	467	467	77063	0	32331	17328000000	40	372	7.27024	0	-1.05295	-0.962821	-1.39209	-0.254721	-0.490162	-0.213438	-0.167961	0.394452	0.15958	0.18027	0.389686	0.158552	0.178641	0.239881	0.27099	0.161579	0.357058	0.312457	0.318165	0.755565
+	3.5005	-1.08988	J3KNB4;P49913	J3KNB4;P49913	Cathelicidin antimicrobial peptide;Antibacterial protein FALL-39;Antibacterial protein LL-37	CAMP	118	Color2 [DarkGray]	1	4					+	7	7	7	358	358	358	19591	0	19076	14968000000	9	173	9.86106	0	-0.068882	-1.10787	-0.11327	-0.0826048	-0.0072663	0.106153	-0.979463	-0.472448	-0.654722	-0.706236	0.0799984	-0.0527754	-0.117929	-0.83377	-0.333817	-0.556618	0.765093	0.661404	0.660212	1.0212
+	3.47881	0.357881	P02686;H0YF02;J3QQK6;H7BYR8;A8MZH3;J3QKL5;J3QL64;E9PMR5;H0YEA2;E9PJ72;E9PKX9;E9PNZ1;F8WEU6;F5H7N4;J3KT34;E9PLQ9;C9J6H1;J3KS94;E9PQE7;J3KT01;E9PSE2;E9PLU9	P02686;H0YF02;J3QQK6;H7BYR8;A8MZH3;J3QKL5;J3QL64;E9PMR5;H0YEA2;E9PJ72;E9PKX9;E9PNZ1;F8WEU6;F5H7N4;J3KT34	Myelin basic protein	MBP	76	Color2 [DarkGray]	1	4					+	4	4	4	118	118	118	33117	0	357	2602000000	14	138	6.20879	0	0.0496344	0.13177	-0.125139	-0.2374	-0.199696	-0.241434	-0.161603	-0.178993	0.005536	0.0262824	-0.216466	-0.462505	-0.327318	0.0804853	-0.315069	-0.104905	-0.410413	-0.418875	-0.407013	-0.562406
+	3.41769	0.369594	A0A0B4J231;B9A064;A0A5H1ZRQ4;P0CG04	A0A0B4J231;B9A064;A0A5H1ZRQ4;P0CG04	Immunoglobulin lambda-like polypeptide 5;Ig lambda-1 chain C regions	IGLL5;IGLC1	30	Color2 [DarkGray]	1	4					+	8	8	3	488	488	205	2315	0	32331	83372000000	11	292	5.09037	0	1.87429	1.88113	1.88245	1.77798	1.88992	1.88135	2.09609	1.60071	1.72148	1.58917	1.88915	1.8108	1.76765	1.60486	1.69996	1.46571	1.4606	1.40985	1.36916	1.8171
+	3.34328	0.357046	P10909;H0YLK8;E7ERK6;H0YC35;E7ETB4;E5RG36;E5RGB0;E5RH61;E5RJZ5;H0YAS8	P10909;H0YLK8;E7ERK6;H0YC35	Clusterin;Clusterin beta chain;Clusterin alpha chain;Clusterin	CLU	192	Color2 [DarkGray]	1	4					+	12	12	12	276	276	276	52494	0	10809	7786700000	19	113	6.32937	0	0.273312	0.422739	0.405431	0.258116	0.0761613	0.120127	0.465236	0.537714	0.452412	0.384786	0.363512	0.290605	0.238156	0.428848	0.261194	0.387827	0.00980784	-0.0933232	0.0373349	-0.245076
+	3.32937	0.852407	A0A0B4J1V0	A0A0B4J1V0		IGHV3-15	27	Color2 [DarkGray]	1	4					+	4	2	2	261	126	126	12926	0	22265	488290000	7	21	4.42092	0	-1.00408	-0.828212	-1.17308	-0.487464	-0.404809	-0.47815	-0.502189	-1.35679	-1.67018	-2.00103	-0.657753	-1.00236	-0.848081	-1.76039	-1.50829	-1.67024	-1.70897	-1.89141	-0.954849	-1.49381
+	3.2812	-0.833854	Q15485	Q15485	Ficolin-2	FCN2	232	Color2 [DarkGray]	1	4					+	9	9	9	294	294	294	34001	0	18567	3670500000	14	96	2.05221	0.00228571	-1.48031	-0.974434	-0.986011	-0.704405	-0.539742	-0.484928	-0.566828	-0.860177	-1.04383	-1.28409	-0.0672637	-0.407408	-0.197097	0.479761	0.559764	0.556853	0.00687433	0.128943	0.0946475	-0.471372
+	3.23168	0.379374	P01834;A0A5H1ZRQ3	P01834;A0A5H1ZRQ3	Ig kappa chain C region	IGKC	149	Color2 [DarkGray]	1	4					+	8	8	8	822	822	822	11765	0	32331	98209000000	5	408	4.1551	0	1.81488	1.85587	1.73767	1.64182	1.44665	1.58733	1.6321	1.51198	1.55189	1.57725	1.71621	1.64249	1.57087	1.50366	1.30812	1.4209	1.4357	1.41043	1.36517	1.12711
+	3.17044	0.436295	P01871	P01871	Ig mu chain C region	IGHM	150	Color2 [DarkGray]	1	4					+	31	31	31	653	653	653	49439	0	32331	6628800000000000	25	1494	7.19214	0	2.59486	2.60749	2.71244	2.25352	2.244	2.31051	2.26262	2.478	2.47819	2.56691	2.49771	2.48548	2.42608	2.34546	2.35152	2.42332	2.09651	2.10472	1.99175	1.85295
+	2.89618	0.393628	P06727	P06727	Apolipoprotein A-IV	APOA4	181	Color2 [DarkGray]	1	4					+	20	20	19	427	427	399	45371	0	1554	4639500000	25	166	7.8621	0	-0.217552	-0.126721	-0.300944	0.0518415	0.00660335	0.139958	0.0139833	-0.595692	-0.55613	-0.692806	-0.211916	-0.424217	-0.444301	-0.609354	-0.56133	-0.775312	-0.671802	-0.521956	-0.518861	-0.291155
+	2.77386	0.447098	P01591;D6RD17;D6RHJ6;C9JA05	P01591;D6RD17;D6RHJ6	Immunoglobulin J chain	IGJ;JCHAIN	136	Color2 [DarkGray]	1	4					+	7	7	7	421	421	421	18098	0	58157	37103000000	8	121	4.88104	0	1.54163	1.67416	1.65529	1.24048	1.12114	1.36344	1.35566	1.42779	1.57113	1.5058	1.4759	1.46172	1.438	1.08574	1.28382	1.1603	1.09294	1.20211	1.05205	0.762164
+	2.71975	-0.701117	P04003;A6PVY5;F2Z2V7	P04003	C4b-binding protein alpha chain	C4BPA	167	Color2 [DarkGray]	1	4					+	25	25	25	561	561	561	67033	0	29558	69998000000	30	450	3.4366	0.000137931	1.11414	1.2169	1.41155	0.319451	0.49214	0.620661	0.601407	1.18526	1.25827	1.30728	1.10398	1.53444	1.19697	1.10569	0.81278	0.952912	1.58241	1.61122	1.53835	1.53757
+	2.71792	0.886427	P40926;G3XAL0	P40926;G3XAL0	Malate dehydrogenase, mitochondrial;Malate dehydrogenase	MDH2	210	Color2 [DarkGray]	1	4					+	6	6	6	228	228	228	35503	0	57648	454790000	20	13	4.69532	0	-0.680327	-0.779613	-0.421925	-0.857709	-1.69039	-1.47332	-1.42881	-0.736687	-0.33201	-0.485092	-2.25667	-0.759793	-1.41325	-0.330482	-0.701126	-0.356238	-2.07309	-2.31701	-2.05173	-1.70628
+	2.52575	1.57309	P0DOY2;P0DOY3;P0CF74;A0A5H1ZRQ7;A0M8Q6	P0DOY2;P0DOY3;P0CF74	Ig lambda-6 chain C region	IGLC6	190	Color2 [DarkGray]	1	4					+	8	3	3	915	34	34	11293	0	27977	2365600000	7	28	3.96066	0	-0.110571	-1.5755	0.352508	-1.81167	0.320209	0.330254	0.483003	-1.96485	-0.990872	-0.36594	-0.0603877	-1.13008	-1.94345	-1.07657	-1.81096	-1.02529	-1.72097	-2.12346	-1.95399	-1.41653
+	2.38244	0.851125	P68363	P68363	Tubulin alpha-1B chain	TUBA1B	222	Color2 [DarkGray]	1	4					+	12	12	0	355	355	0	50151	0	15637	2780900000	21	76	4.64874	0	-0.121014	-0.142283	-0.116842	-1.24434	-0.959392	-0.969654	-0.973345	-0.289738	0.557719	0.515362	-0.724509	-0.604123	-0.753511	0.671906	-0.0706059	0.491009	-1.51612	-1.14927	-1.19915	-1.94211
+	2.28844	1.05726	P04406;E7EUT5;O14556	P04406;E7EUT5	Glyceraldehyde-3-phosphate dehydrogenase	GAPDH	175	Color2 [DarkGray]	1	4					+	6	6	6	245	245	245	36053	0	11403	1083100000	17	15	4.14724	0	-0.419594	-0.595774	-0.417675	-2.23343	-1.04119	-0.877746	-1.71703	-0.605619	0.000843281	0.246475	-0.925127	-0.745992	-0.973809	0.16226	-0.665123	-0.00247348	-2.22082	-2.34972	-2.17317	-2.22706
+	2.28366	0.385336	J3KPS3;P04075;H3BPS8;H3BQN4;H3BUH7;H3BR04;H3BR68;H3BMQ8;H3BU78	J3KPS3;P04075;H3BPS8;H3BQN4;H3BUH7;H3BR04	Fructose-bisphosphate aldolase;Fructose-bisphosphate aldolase A	ALDOA	119	Color2 [DarkGray]	1	4					+	4	4	4	16	16	16	39817	0	50895	543710000	21	28	3.17424	0.000253968	-0.761472	-0.553451	-0.855695	-1.06057	-1.02017	-0.985798	-1.08447	-1.00264	-0.794731	-0.829086	-0.904562	-0.891657	-1.14953	-0.759098	-0.977407	-0.752851	-1.14931	-1.09118	-1.11845	-1.29655
+	2.26792	0.647871	A0A3B3ISR2;B4DPQ0;P00736;F5H2D0;A0A3B3ITU4;F5H1V0;F5H6Y3;F5H3N3;H0YFL7;Q9NZP8	A0A3B3ISR2;B4DPQ0;P00736;F5H2D0;A0A3B3ITU4	Complement C1r subcomponent;Complement C1r subcomponent heavy chain;Complement C1r subcomponent light chain	C1R	59	Color2 [DarkGray]	1	4					+	18	18	18	298	298	298	80173	0	15414	3785700000	34	63	3.12516	0.00025	0.32985	0.549013	0.3893	-0.655471	-0.0222976	0.406904	0.208742	0.262096	0.027244	0.284997	0.267803	0.0516756	0.000719161	-0.339605	-0.101529	-0.0485561	-0.676719	-0.737242	-0.513135	-0.113118
+	2.12922	0.936645	P01709;P01706	P01709;P01706	Ig lambda chain V-II region MGC;Ig lambda chain V-II region BOH		144	Color2 [DarkGray]	1	4					+	2	2	2	11	11	11	12382	0	25105	801060000	2	11	6.27223	0	-0.70896	-0.645691	-0.732526	0.850479	-0.196598	-0.110607	-0.250229	-1.56812	-2.02691	-1.31621	-1.00975	-2.05078	-2.16984	-1.60899	-1.34516	-2.19613	-0.767905	-0.804045	-0.760005	-1.44696
+	2.11168	0.681484	I3L4N8;P63261;A0A804GS07;A0A6Q8PFE4;I3L1U9;I3L3I0;J3KT65;K7EM38;I3L3R2;Q6S8J3;A5A3E0;A0A2R8YEA7;A0A2R8YFE2;P0CG38;Q9BYX7;A0A7P0TBL1;P0CG39;F8WCH0	I3L4N8;P63261;A0A804GS07;A0A6Q8PFE4;I3L1U9;I3L3I0	Actin, cytoplasmic 2;Actin, cytoplasmic 2, N-terminally processed	ACTG1	117	Color2 [DarkGray]	1	4					+	14	14	1	595	595	48	38975	0	1301	4737100000	20	178	3.76395	0	0.140141	0.270585	0.132012	-0.114311	-0.301251	-0.125002	-0.142691	-0.121334	0.24643	0.207535	-0.162044	-0.212996	-0.161298	0.313265	-0.117047	0.305602	-0.224738	-0.387408	-0.427217	-0.952923
+	2.05971	0.402392	A0A286YEY1;P01876	A0A286YEY1;P01876	Ig alpha-1 chain C region	IGHA1	56	Color2 [DarkGray]	1	4					+	11	11	4	407	407	148	42848	0	11334	18890000000	14	76	4.00659	0	0.979475	0.98026	1.04404	0.452107	0.847557	0.959074	0.559641	0.835461	0.896609	0.968878	0.923993	1.19231	0.970281	0.852812	0.822816	0.998596	0.588277	0.648307	0.570059	0.196073
+	2.01924	0.438705	Q9BWP8	Q9BWP8	Collectin-11	COLEC11	239	Color2 [DarkGray]	1	4					+	3	3	3	92	92	92	28665	0	31152	230140000	11	15	3.44891	0.000140351	-1.44027	-1.77823	-1.65116	-1.78189	-1.66092	-1.35389	-1.94806	-1.51612	-1.89325	-1.44655	-0.986036	-1.238	-1.32311	-1.54104	-2.00359	-1.86985	-1.85033	-2.15641	-2.45744	-1.78021
+	2.01516	0.428737	P02647;F8W696	P02647;F8W696	Apolipoprotein A-I;Proapolipoprotein A-I;Truncated apolipoprotein A-I	APOA1	151	Color2 [DarkGray]	1	4					+	27	27	27	753	753	753	30777	0	32331	87275000000	18	714	3.21114	0.000258065	1.51839	1.3775	1.4486	1.02461	1.30339	1.35738	1.31396	1.36913	1.18567	1.1824	1.23947	1.36106	1.37543	1.18596	1.34106	1.25748	1.10881	1.12866	1.05988	0.738645
+	1.96308	0.714882	F8WCZ6;A0A087X232;P09871;F5H7T4;H0Y5D1	F8WCZ6;A0A087X232;P09871;F5H7T4;H0Y5D1	Complement C1s subcomponent;Complement C1s subcomponent heavy chain;Complement C1s subcomponent light chain	C1S	15	Color2 [DarkGray]	1	4					+	4	4	4	79	79	79	57519	0	24647	899940000	22	15	1.07998	0.0227048	-0.910349	-0.801175	-0.870286	-0.899573	-2.33671	-1.04147	-1.39478	-0.758003	-1.86052	-0.985928	-0.804066	-2.15332	-1.72406	-1.70139	-0.892253	-0.786628	-2.20125	-1.77169	-1.93044	-1.74024
+	1.88681	0.932198	P68371;Q3ZCM7;M0R2D3;M0R042;M0QYM7;M0R2T4;A0A075B724	P68371	Tubulin beta-4B chain	TUBB4B	224	Color2 [DarkGray]	1	4					+	17	17	1	53	53	27	4983	0	32331	2917800000	19	121	4.42231	0	-0.00275687	-0.102173	0.111687	-1.22974	-1.11634	-1.06526	-1.34787	-0.046009	0.42626	0.422449	-0.827693	-0.646291	-0.371202	0.735208	0.0570521	0.616811	-1.23191	-1.89115	-1.14493	-1.25845
+	1.87893	0.404516	P02760;S4R471	P02760;S4R471	Protein AMBP;Alpha-1-microglobulin;Inter-alpha-trypsin inhibitor light chain;Trypstatin	AMBP	161	Color2 [DarkGray]	1	4					+	4	4	4	165	165	165	38999	0	29782	654400000	16	25	5.87563	0	-1.0304	-0.972825	-1.05962	-1.29127	-1.05199	-1.15682	-1.0896	-0.587355	-0.327856	-0.521137	-0.887536	-0.653787	-0.719936	-0.276058	-0.226855	-0.210663	-1.24246	-1.52997	-1.85345	-1.39657
+	1.84773	0.414619	E9PKE3;P11142;E9PI65;E9PQQ4;E9PQK7;E9PK54;E9PLF4;E9PN89;E9PNE6;P54652;E9PN25;E9PPY6;E9PM13;E9PS65;A8K7Q2	E9PKE3;P11142;E9PI65;E9PQQ4;E9PQK7;E9PK54;E9PLF4;E9PN89;E9PNE6;P54652	Heat shock cognate 71 kDa protein;Heat shock-related 70 kDa protein 2	HSPA8;HSPA2	108	Color2 [DarkGray]	1	4					+	6	6	5	134	134	113	68805	0	47416	507710000	32	22	2.4012	0.00103896	-1.13724	-0.957338	-1.04439	-1.37158	-1.4139	-1.39802	-1.41847	-1.32155	-0.731357	-0.775347	-1.45312	-1.37226	-1.39803	-0.672781	-1.39155	-0.845781	-1.40012	-1.27454	-1.7636	-2.0118
+	1.75165	0.967126	A0A075B6K4;P01715	A0A075B6K4		IGLV3-10	2	Color2 [DarkGray]	1	4					+	3	3	2	165	165	165	12441	0	1809	1147900000	4	29	2.62089	0.000540541	-0.724587	-1.67415	0.240456	-0.626089	-1.42234	-0.820275	-2.06341	-0.849136	-0.54161	-0.690403	-1.8184	-1.46013	-1.844	-1.04425	-0.848985	-0.847043	-1.7144	-2.24284	-2.04872	-1.42854
+	1.74666	0.955657	B4DNK4;H3BTN5;A0A804F6T5;A0A804F729;P14618;H3BT25;H3BUW1;H3BTJ2;H3BQ34;H3BU13;H3BR70;P30613	B4DNK4;H3BTN5;A0A804F6T5;A0A804F729;P14618;H3BT25;H3BUW1;H3BTJ2;H3BQ34	Pyruvate kinase;Pyruvate kinase PKM	PKM	73	Color2 [DarkGray]	1	4					+	3	3	3	74	74	74	49897	0	28507	949780000	26	12	4.20363	0	-0.741317	0.300864	0.234037	-1.53163	-0.931041	-1.85088	-0.91638	0.0695113	-0.19195	-0.0721716	0.0649052	0.140616	0.0914982	-0.0603926	-2.45388	-0.162207	-1.88684	-1.82023	-1.80368	-1.28113
+	1.63353	-1.13063	P02749;J3QRN2;J3QLI0;J3KS17	P02749;J3QRN2	Beta-2-glycoprotein 1	APOH	159	Color2 [DarkGray]	1	4					+	7	7	7	243	243	243	38298	0	50793	3018900000	17	46	4.09814	0	-1.82615	-0.0923517	-0.492764	-2.19063	-1.70442	-0.534756	-1.71557	-0.474751	-0.70029	-0.437861	-0.73657	-0.378949	-1.92995	-0.623857	-0.535059	-0.855429	0.400808	0.490849	0.399801	-1.05296
+	1.5457	1.21036	P01780;A0A0B4J1V1;P01763;P01762;A0A075B7F0;P01766	P01780;A0A0B4J1V1;P01763;P01762	Ig heavy chain V-III region JON;Ig heavy chain V-III region WEA;Ig heavy chain V-III region TRO	IGHV3-21	147	Color2 [DarkGray]	1	4					+	3	2	1	265	171	77	12943	0	1285	4962600000	5	35	1.78221	0.00365591	-1.57821	0.802933	0.819112	-1.51306	-1.82927	0.143376	-0.154395	-2.03538	-0.147324	0.484231	0.538953	-1.34824	0.583722	0.259109	0.254813	0.138113	-1.64447	-1.62461	-1.37261	-1.66633
+	1.48908	0.598445	M0R116;A0A2R8YEY8;A0A0A0MT26;P13637;B1AKY9;P50993;P05023;H0Y7C1;M0QXF2;Q13733;P54707;P20648;Q5TC05;A0A669K9X0;E9PRA5	M0R116;A0A2R8YEY8;A0A0A0MT26;P13637;B1AKY9;P50993;P05023;H0Y7C1	Sodium/potassium-transporting ATPase subunit alpha-3;Sodium/potassium-transporting ATPase subunit alpha-2;Sodium/potassium-transporting ATPase subunit alpha-1	ATP1A3;ATP1A2;ATP1A1	25	Color2 [DarkGray]	1	4					+	12	12	12	151	151	151	10828	0	81124	1909600000	43	92	3.48292	0.000142857	-0.203685	-0.129266	-0.208455	-0.672092	-0.711038	-0.473419	-0.801214	-0.275719	-0.0865278	-0.176361	-0.472153	-0.375033	-0.39913	0.0731331	-0.396032	-0.0794232	-0.661547	-0.501838	-0.698374	-1.83801
+	1.18647	1.13375	P00739;A0A0A0MRD9	P00739;A0A0A0MRD9	Haptoglobin-related protein	HPR	127	Color2 [DarkGray]	1	4					+	17	5	5	445	213	213	39029	0	35814	4911300000	20	37	2.09675	0.00204878	0.841619	0.768898	0.82504	-1.50223	-0.031012	-0.125833	-0.151629	0.638974	0.426167	0.425494	-0.127305	0.550467	0.532877	0.299861	0.352947	0.180126	0.479589	0.379001	-1.7366	-1.94288
[truncated: 14 more columns]

## Sheet: HP - 5SX
Significant	-log(P - value)	Difference	Protein IDs	Majority protein IDs	Protein names	Gene names	id	Symbol color	Symbol type	Symbol size	Show label	Only identified by site	Reverse	Potential contaminant	ANOVA Significant	Peptides	Razor + unique peptides	Unique peptides	Sequence coverage [%]	Unique + razor sequence coverage [%]	Unique sequence coverage [%]	Mol. weight [kDa]	Q-value	Score	Intensity	iBAQ peptides	MS/MS count	#NAME?	ANOVA q-value	LFQ intensity 01	LFQ intensity 01_211116203409	LFQ intensity 01_211116221134	LFQ intensity 02	LFQ intensity 02_211117012617	LFQ intensity 02_211117030340	LFQ intensity 02_211117044104	LFQ intensity 03	LFQ intensity 03_211117075550	LFQ intensity 03_211117093314	LFQ intensity 04	LFQ intensity 04_211117124800	LFQ intensity 04_211117142524	LFQ intensity 05	LFQ intensity 05_211117174036	LFQ intensity 05_211117191758	LFQ intensity 18	LFQ intensity 18_211120085806	LFQ intensity 18_211120103530	LFQ intensity 19
+	9.31555	0.674164	P00738;J3QR68;H0Y300;A0A0C4DGL8;J3QLC9;A0A087WU08;H3BS21;J3KTC3;J3KRH2;J3KSV1;J3QQI8;H3BMJ7	P00738;J3QR68;H0Y300;A0A0C4DGL8;J3QLC9;A0A087WU08	Haptoglobin;Haptoglobin alpha chain;Haptoglobin beta chain	HP	126	Color2 [DarkGray]	1	4					+	23	23	11	51	51	31	45205	0	30994	62753000000	20	552	9.8247	0	1.2731	1.32705	1.25496	1.2244	1.22388	1.26416	1.4014	0.92313	0.777378	0.800889	1.26551	1.02633	1.00438	0.675526	0.807583	0.754549	0.82692	0.820896	0.799308	0.91806
+	9.26879	-1.21034	CON__P02768-1;P02768;A0A0C4DGB6;B7WNR0;H0YA55;D6RHD5;A0A087WWT3;C9JKR2;H7C013	CON__P02768-1;P02768;A0A0C4DGB6;B7WNR0;H0YA55;D6RHD5;A0A087WWT3;C9JKR2	Serum albumin	ALB	89	Color2 [DarkGray]	1	4					+	58	58	52	826	826	77	69366	0	32331	4528400000000000	37	2344	19.6176	0	0.683351	0.766927	0.774505	0.573375	0.648769	0.658416	0.627927	2.09384	2.1467	2.17945	1.96707	1.96132	2.04505	2.24387	2.25635	2.28372	1.73695	1.66308	1.59088	1.46105
+	7.69178	-1.89071	Q13790	Q13790	Apolipoprotein F	APOF	229	Color2 [DarkGray]	1	4					+	4	4	4	23	23	23	35399	0	11142	26018000000	13	48	8.79153	0	-0.616649	-0.56289	-0.52644	-1.25147	-0.719361	-0.521791	-0.623477	1.30996	1.93865	1.90868	0.0670965	0.90387	1.06108	1.85444	1.98238	1.90341	0.88744	1.02602	1.21234	0.259385
+	7.68902	0.542356	Q9Y6R7;A0A087WXI2;A0A087WUZ2	Q9Y6R7;A0A087WXI2	IgGFc-binding protein	FCGBP	12	Color2 [DarkGray]	1	4					+	34	34	34	134	134	134	57201	0	2964	8130500000	163	293	4.5562	0	0.204078	0.301578	0.215071	0.134405	0.178719	0.203242	0.0937283	-0.197017	-0.309379	-0.325839	0.0389155	-0.00529838	-0.004549	-0.809861	-0.587305	-0.81174	-0.17877	-0.199229	-0.301927	-0.442821
+	7.11086	0.701819	A1L4H1;M0QZ17	A1L4H1	Soluble scavenger receptor cysteine-rich domain-containing protein SSC5D	SSC5D	74	Color2 [DarkGray]	1	4					+	15	15	15	121	121	121	16574	0	32331	4224300000	61	155	10.8881	0	0.11332	0.233953	0.0847153	0.225833	0.014313	0.209275	0.204388	-0.55017	-0.777155	-0.83432	-0.260354	-0.364232	-0.488485	-0.792438	-0.484366	-0.503175	-0.494844	-0.58244	-0.62509	-0.687207
+	6.01452	1.23391	E7EX29;P63104;E7ESK7;E5RGE1;E5RIR4;E9PD24;E7EVZ2;B0AZS6;B7Z2E6;H0YB80	E7EX29;P63104;E7ESK7;E5RGE1;E5RIR4;E9PD24;E7EVZ2;B0AZS6	14-3-3 protein zeta/delta	YWHAZ	103	Color2 [DarkGray]	1	4					+	6	6	5	268	268	228	28036	0	86745	450130000	14	22	10.7116	0	-0.656618	-0.627886	-0.830266	-0.947952	-0.951876	-1.08421	-0.710363	-1.11445	-0.866123	-0.818103	-0.845949	-1.01991	-0.844519	-0.707141	-0.98085	-0.986582	-1.77679	-1.34132	-1.56916	-1.99433
+	5.73862	-0.985729	O95445	O95445	Apolipoprotein M	APOM	125	Color2 [DarkGray]	1	4					+	8	8	1	383	383	53	21253	0	68406	41672000000	10	274	12.3523	0	0.24709	-0.0407666	0.24218	-0.0887486	0.18477	-0.0737901	0.361625	2.09462	2.15639	2.14708	1.85647	1.30207	1.25468	2.24718	2.10966	2.33743	0.802951	1.19623	1.19023	0.912241
+	5.60356	0.682078	P06727	P06727	Apolipoprotein A-IV	APOA4	181	Color2 [DarkGray]	1	4					+	20	20	19	427	427	399	45371	0	1554	4639500000	25	166	7.8621	0	-0.217552	-0.126721	-0.300944	0.0518415	0.00660335	0.139958	0.0139833	-0.595692	-0.55613	-0.692806	-0.211916	-0.424217	-0.444301	-0.609354	-0.56133	-0.775312	-0.671802	-0.521956	-0.518861	-0.291155
+	5.46271	0.346594	A0A0B4J231;B9A064;A0A5H1ZRQ4;P0CG04	A0A0B4J231;B9A064;A0A5H1ZRQ4;P0CG04	Immunoglobulin lambda-like polypeptide 5;Ig lambda-1 chain C regions	IGLL5;IGLC1	30	Color2 [DarkGray]	1	4					+	8	8	3	488	488	205	2315	0	32331	83372000000	11	292	5.09037	0	1.87429	1.88113	1.88245	1.77798	1.88992	1.88135	2.09609	1.60071	1.72148	1.58917	1.88915	1.8108	1.76765	1.60486	1.69996	1.46571	1.4606	1.40985	1.36916	1.8171
+	5.23264	0.575095	O43866	O43866	CD5 antigen-like	CD5L	122	Color2 [DarkGray]	1	4					+	18	18	18	588	588	588	38087	0	27456	48632000000	18	349	8.33563	0	1.51387	1.47717	1.50795	1.33735	1.52112	1.54269	1.09993	1.18959	1.27372	1.24731	1.27844	1.34211	1.32183	1.00037	0.982201	1.054	1.00597	1.01406	0.949141	0.764412
+	5.19633	0.661301	Q08380;K7EP36;K7ESM3;K7EKQ5;K7EJY8;K7ES75;K7EN99;K7ERZ6;K7EJD3	Q08380	Galectin-3-binding protein	LGALS3BP	227	Color2 [DarkGray]	1	4					+	15	15	15	274	274	274	6533	0	1927	21315000000	26	339	6.06271	0	1.10914	1.00865	1.13647	0.771648	0.740234	0.659782	0.895538	0.56088	0.349075	0.34932	0.674214	0.654858	0.580881	0.0486632	0.332848	0.152523	0.454279	0.494231	0.459008	0.0496329
+	4.34952	-0.836296	P01857;A0A0A0MS08;A0A0A0MS07	P01857;A0A0A0MS08;A0A0A0MS07	Ig gamma-1 chain C region	IGHG1	20	Color2 [DarkGray]	1	4					+	12	12	6	479	479	279	36105	0	19422	25972000000	15	178	9.60442	0	0.216755	0.231678	0.197263	-0.417059	0.120765	0.207712	0.202882	1.35846	1.25414	1.23377	0.770558	0.796526	0.956958	1.30004	1.33875	1.31519	0.289278	0.378311	0.358192	0.519167
+	4.27525	1.14739	A0A0B4J1V0	A0A0B4J1V0		IGHV3-15	27	Color2 [DarkGray]	1	4					+	4	2	2	261	126	126	12926	0	22265	488290000	7	21	4.42092	0	-1.00408	-0.828212	-1.17308	-0.487464	-0.404809	-0.47815	-0.502189	-1.35679	-1.67018	-2.00103	-0.657753	-1.00236	-0.848081	-1.76039	-1.50829	-1.67024	-1.70897	-1.89141	-0.954849	-1.49381
+	4.07	0.466202	P02686;H0YF02;J3QQK6;H7BYR8;A8MZH3;J3QKL5;J3QL64;E9PMR5;H0YEA2;E9PJ72;E9PKX9;E9PNZ1;F8WEU6;F5H7N4;J3KT34;E9PLQ9;C9J6H1;J3KS94;E9PQE7;J3KT01;E9PSE2;E9PLU9	P02686;H0YF02;J3QQK6;H7BYR8;A8MZH3;J3QKL5;J3QL64;E9PMR5;H0YEA2;E9PJ72;E9PKX9;E9PNZ1;F8WEU6;F5H7N4;J3KT34	Myelin basic protein	MBP	76	Color2 [DarkGray]	1	4					+	4	4	4	118	118	118	33117	0	357	2602000000	14	138	6.20879	0	0.0496344	0.13177	-0.125139	-0.2374	-0.199696	-0.241434	-0.161603	-0.178993	0.005536	0.0262824	-0.216466	-0.462505	-0.327318	0.0804853	-0.315069	-0.104905	-0.410413	-0.418875	-0.407013	-0.562406
+	4.0412	-0.462012	P01008	P01008	Antithrombin-III	SERPINC1	130	Color2 [DarkGray]	1	4					+	4	4	4	116	116	116	52602	0	2749	524780000	27	24	5.74879	0	-1.36808	-1.54028	-1.76868	-1.24842	-1.34442	-1.39958	-1.35483	-0.893201	-1.08592	-0.881799	-0.935137	-1.04083	-1.02189	-1.04596	-0.84585	-0.991087	-1.16515	-1.11364	-1.07505	-1.32444
+	3.93714	0.40052	P02649;H0Y7L5;E9PEV4;E7ERP7;CON__Q03247	P02649;H0Y7L5;E9PEV4;E7ERP7	Apolipoprotein E	APOE	152	Color2 [DarkGray]	1	4					+	33	33	33	785	785	785	36154	0	32331	3703600000000000	22	1428	11.0145	0	2.18696	2.18487	2.21747	1.88103	1.87893	1.88486	2.03509	1.95048	1.92681	1.98758	2.02561	1.89853	1.90332	1.86436	1.96856	1.93562	1.60013	1.59258	1.54039	1.44219
+	3.8462	-1.18539	J3KNB4;P49913	J3KNB4;P49913	Cathelicidin antimicrobial peptide;Antibacterial protein FALL-39;Antibacterial protein LL-37	CAMP	118	Color2 [DarkGray]	1	4					+	7	7	7	358	358	358	19591	0	19076	14968000000	9	173	9.86106	0	-0.068882	-1.10787	-0.11327	-0.0826048	-0.0072663	0.106153	-0.979463	-0.472448	-0.654722	-0.706236	0.0799984	-0.0527754	-0.117929	-0.83377	-0.333817	-0.556618	0.765093	0.661404	0.660212	1.0212
+	3.82595	-0.903928	P02747	P02747	Complement C1q subcomponent subunit C	C1QC	158	Color2 [DarkGray]	1	4					+	5	5	5	253	253	253	25773	0	40975	1721200000	13	58	5.21428	0	-0.840655	-0.89626	-0.871731	-1.80339	-1.09961	-1.53453	-1.34486	-0.307663	-0.736068	-0.464091	-0.373802	-0.594558	-0.631248	-0.367238	-0.299934	-0.494965	-1.07367	-0.978144	-1.07125	-1.97768
+	3.8213	-0.898745	P02790;Q9BS19	P02790;Q9BS19	Hemopexin	HPX	165	Color2 [DarkGray]	1	4					+	8	8	8	223	223	223	51676	0	63724	1934400000	22	76	5.73274	0	-1.84411	-1.30799	-1.3971	-1.65593	-0.917178	-1.46965	-1.22928	-0.362759	-0.19093	-0.230585	-0.273942	-0.749622	-0.547855	-0.284024	-0.353856	-0.263809	-0.800039	-0.624654	-1.13519	-0.939473
+	3.81834	1.49788	P01709;P01706	P01709;P01706	Ig lambda chain V-II region MGC;Ig lambda chain V-II region BOH		144	Color2 [DarkGray]	1	4					+	2	2	2	11	11	11	12382	0	25105	801060000	2	11	6.27223	0	-0.70896	-0.645691	-0.732526	0.850479	-0.196598	-0.110607	-0.250229	-1.56812	-2.02691	-1.31621	-1.00975	-2.05078	-2.16984	-1.60899	-1.34516	-2.19613	-0.767905	-0.804045	-0.760005	-1.44696
+	3.60035	-0.659093	A0A096LPE2;P35542	A0A096LPE2;P35542	Serum amyloid A-4 protein	SAA2-SAA4;SAA4	16	Color2 [DarkGray]	1	4					+	5	5	5	255	255	255	23353	0	4556	37791000000	12	225	7.53377	0	1.15066	0.818053	1.1161	0.377311	0.816433	0.618103	0.814129	0.958662	0.671645	0.780495	0.558595	1.10033	1.02154	0.882035	0.98276	0.930924	1.31244	1.26213	1.18738	1.04717
+	3.42171	-0.760413	Q15485	Q15485	Ficolin-2	FCN2	232	Color2 [DarkGray]	1	4					+	9	9	9	294	294	294	34001	0	18567	3670500000	14	96	2.05221	0.00228571	-1.48031	-0.974434	-0.986011	-0.704405	-0.539742	-0.484928	-0.566828	-0.860177	-1.04383	-1.28409	-0.0672637	-0.407408	-0.197097	0.479761	0.559764	0.556853	0.00687433	0.128943	0.0946475	-0.471372
+	3.27797	-0.455304	A0A024R6I7;P01009;A0A0G2JRN3;G3V2B9;G3V5R8;G3V387;A0A0B4J278;G3V544	A0A024R6I7;P01009;A0A0G2JRN3	Alpha-1-antitrypsin;Short peptide from AAT	SERPINA1	0	Color2 [DarkGray]	1	4					+	19	19	19	428	428	428	46708	0	22589	18887000000	23	203	11.2343	0	-0.103985	0.120362	0.169686	0.217557	0.533791	0.180969	0.461165	1.07483	0.993909	1.02156	0.898603	0.671442	0.933388	1.07413	1.07671	1.04522	0.101369	0.1809	0.384326	0.0679249
+	3.2131	-0.598285	P01024;M0QYC8;M0QXZ3;M0R0Q9;M0R1Q1;O95568	P01024	Complement C3;Complement C3 beta chain;C3-beta-c;Complement C3 alpha chain;C3a anaphylatoxin;Acylation stimulating protein;Complement C3b alpha chain;Complement C3c alpha chain fragment 1;Complement C3dg fragment;Complement C3g fragment;Complement C3d fragment;Complement C3f fragment;Complement C3c alpha chain fragment 2	C3	133	Color2 [DarkGray]	1	4					+	78	78	69	509	509	469	18715	0	32331	45744000000	95	923	8.49626	0	-0.348543	-0.29215	-0.435359	0.214505	0.212642	0.193215	-0.224306	0.637418	0.560077	0.551947	0.487522	0.60288	0.616759	0.711031	0.803703	0.78463	-0.176764	-0.224211	-0.225939	-0.135299
+	3.0222	-1.44369	P01624;A0A0C4DH90;A0A075B6H7;A0A0C4DH55	P01624;A0A0C4DH90;A0A075B6H7;A0A0C4DH55	Ig kappa chain V-III region POM	IGKV3OR2-268;IGKV3-7;IGKV3D-7	141	Color2 [DarkGray]	1	4					+	2	2	1	261	261	78	12496	0	1348	1866500000	3	19	2.85255	0.000405797	-1.75415	-2.0241	-1.87888	-2.1173	-1.55434	-1.78666	-1.96283	-2.01757	-1.82627	-2.20088	0.0465554	0.137752	0.136477	-0.195759	0.0637488	-0.0996626	-1.65713	-1.70587	-2.24523	-2.0616
+	2.99549	-1.53146	P02749;J3QRN2;J3QLI0;J3KS17	P02749;J3QRN2	Beta-2-glycoprotein 1	APOH	159	Color2 [DarkGray]	1	4					+	7	7	7	243	243	243	38298	0	50793	3018900000	17	46	4.09814	0	-1.82615	-0.0923517	-0.492764	-2.19063	-1.70442	-0.534756	-1.71557	-0.474751	-0.70029	-0.437861	-0.73657	-0.378949	-1.92995	-0.623857	-0.535059	-0.855429	0.400808	0.490849	0.399801	-1.05296
+	2.86715	0.373307	P01591;D6RD17;D6RHJ6;C9JA05	P01591;D6RD17;D6RHJ6	Immunoglobulin J chain	IGJ;JCHAIN	136	Color2 [DarkGray]	1	4					+	7	7	7	421	421	421	18098	0	58157	37103000000	8	121	4.88104	0	1.54163	1.67416	1.65529	1.24048	1.12114	1.36344	1.35566	1.42779	1.57113	1.5058	1.4759	1.46172	1.438	1.08574	1.28382	1.1603	1.09294	1.20211	1.05205	0.762164
+	2.84961	0.525022	A0A3B3ISJ1;A0A0S2Z4L3;P07225;G5E9F8;A0A3B3IRK9;A0A3B3IUA6	A0A3B3ISJ1;A0A0S2Z4L3;P07225;G5E9F8;A0A3B3IRK9	Vitamin K-dependent protein S	PROS1	49	Color2 [DarkGray]	1	4					+	17	17	17	252	252	252	73757	0	29143	8956900000	30	190	4.37064	0	-0.0560054	-0.0459701	-0.284871	0.210059	0.281683	0.226122	0.38868	-0.330543	-0.506172	-0.609641	0.25046	-0.00559609	-0.0261752	-1.34617	-0.92486	-0.879639	0.352196	0.389925	0.410045	0.373424
+	2.78642	-0.583336	P02654;K7ERI9;K7EJI9;K7ELM9;K7EPF9;K7EKP1	P02654;K7ERI9;K7EJI9;K7ELM9;K7EPF9	Apolipoprotein C-I;Truncated apolipoprotein C-I	APOC1	154	Color2 [DarkGray]	1	4					+	9	9	9	542	542	542	93318	0	82991	1669900000000000	3	759	10.1776	0	1.54097	1.558	1.77147	1.11838	0.951343	1.05424	1.20891	1.19002	1.11044	1.02745	1.29394	1.28995	1.11645	0.969122	1.18967	1.13223	1.58082	1.54735	1.48085	1.13687
+	2.64109	0.387349	P04275	P04275	von Willebrand factor;von Willebrand antigen 2	VWF	173	Color2 [DarkGray]	1	4					+	100	100	100	426	426	426	30926	0	32331	3811300000000000	132	3174	6.5643	0	1.96376	1.96939	1.95818	1.49322	1.55468	1.60175	1.66334	1.62427	1.52903	1.55097	1.63179	1.50742	1.51097	1.75426	1.79448	1.78692	1.30449	1.32291	1.26794	1.26002
+	2.55508	0.327633	F5H7V9;E9PC84;J3QSU6;P24821;H0YGZ3	F5H7V9;E9PC84;J3QSU6;P24821	Tenascin	TNC	105	Color2 [DarkGray]	1	4					+	7	7	7	41	41	41	20114	0	45529	741750000	85	48	3.36002	0.000133333	-0.795996	-0.702285	-0.828346	-0.627494	-1.10361	-0.819349	-0.785794	-1.08917	-1.47487	-1.52512	-0.993093	-1.62535	-1.12918	-1.37513	-1.05888	-1.27414	-1.07724	-0.91402	-0.989096	-1.40119
+	2.54795	-0.772699	P02787;H7C5E8;F8WEK9;F8WCI6;C9JB55;C9JVG0;F8WC57	P02787	Serotransferrin	TF	164	Color2 [DarkGray]	1	4					+	32	32	32	467	467	467	77063	0	32331	17328000000	40	372	7.27024	0	-1.05295	-0.962821	-1.39209	-0.254721	-0.490162	-0.213438	-0.167961	0.394452	0.15958	0.18027	0.389686	0.158552	0.178641	0.239881	0.27099	0.161579	0.357058	0.312457	0.318165	0.755565
+	2.54425	0.838198	P40926;G3XAL0	P40926;G3XAL0	Malate dehydrogenase, mitochondrial;Malate dehydrogenase	MDH2	210	Color2 [DarkGray]	1	4					+	6	6	6	228	228	228	35503	0	57648	454790000	20	13	4.69532	0	-0.680327	-0.779613	-0.421925	-0.857709	-1.69039	-1.47332	-1.42881	-0.736687	-0.33201	-0.485092	-2.25667	-0.759793	-1.41325	-0.330482	-0.701126	-0.356238	-2.07309	-2.31701	-2.05173	-1.70628
+	2.51004	-0.646191	P27169;F8WF42	P27169	Serum paraoxonase/arylesterase 1	PON1	207	Color2 [DarkGray]	1	4					+	10	10	10	42	42	42	39731	0	311	21772000000	15	125	15.3663	0	-1.80145	-1.83752	-1.70009	-1.59409	-1.83835	-1.49203	-1.52203	1.17047	2.05939	2.05144	0.587244	1.41928	1.17105	1.78919	1.59297	1.91097	-1.05585	-0.934068	-0.5209	-1.92333
+	2.4321	-0.618181	P00747	P00747	Plasminogen;Plasmin heavy chain A;Activation peptide;Angiostatin;Plasmin heavy chain A, short form;Plasmin light chain B	PLG	128	Color2 [DarkGray]	1	4					+	4	4	4	7	7	7	90568	0	25214	383750000	43	13	4.79072	0	-1.75478	-1.82459	-1.65285	-2.07893	-1.50602	-1.07323	-1.93219	-0.89685	-1.00155	-1.14745	-0.62867	-0.7514	-0.721335	-0.992364	-0.63423	-0.996918	-2.12787	-1.0149	-1.06459	-2.16009
+	2.38538	0.490903	P20851;Q5VVQ7	P20851	C4b-binding protein beta chain	C4BPB	204	Color2 [DarkGray]	1	4					+	6	6	6	274	274	274	28357	0	75595	18079000000	14	99	4.2278	0	0.41269	0.535469	0.37981	0.921902	1.09089	0.874565	1.05586	0.186785	-0.153016	-0.0769958	0.82185	0.647708	0.687897	-0.588485	-0.059608	-0.358268	1.00237	0.927283	0.822711	1.03862
+	2.38253	0.36162	A0A0B4J1X5;A0A075B7E8;A0A0J9YVY3	A0A0B4J1X5;A0A075B7E8		IGHV3-74;IGHV3OR16-13	28	Color2 [DarkGray]	1	4					+	4	4	2	376	376	188	12839	0	29092	12582000000	7	109	1.8147	0.00347253	0.924384	1.05936	0.917399	0.343643	0.936811	0.893242	1.01805	0.821086	0.521192	0.618085	0.897796	0.766282	0.715573	0.349576	0.55692	0.482088	0.780823	0.747274	0.65388	0.0160681
+	2.17809	0.324665	I3L4N8;P63261;A0A804GS07;A0A6Q8PFE4;I3L1U9;I3L3I0;J3KT65;K7EM38;I3L3R2;Q6S8J3;A5A3E0;A0A2R8YEA7;A0A2R8YFE2;P0CG38;Q9BYX7;A0A7P0TBL1;P0CG39;F8WCH0	I3L4N8;P63261;A0A804GS07;A0A6Q8PFE4;I3L1U9;I3L3I0	Actin, cytoplasmic 2;Actin, cytoplasmic 2, N-terminally processed	ACTG1	117	Color2 [DarkGray]	1	4					+	14	14	1	595	595	48	38975	0	1301	4737100000	20	178	3.76395	0	0.140141	0.270585	0.132012	-0.114311	-0.301251	-0.125002	-0.142691	-0.121334	0.24643	0.207535	-0.162044	-0.212996	-0.161298	0.313265	-0.117047	0.305602	-0.224738	-0.387408	-0.427217	-0.952923
+	2.17441	0.660306	O14791;B1AH96	O14791	Apolipoprotein L1	APOL1	121	Color2 [DarkGray]	1	4					+	10	10	10	241	241	241	43974	0	11428	10381000000	19	217	3.61547	0	0.238154	0.24637	-0.00809899	1.05003	0.939158	1.14034	0.796223	-0.0301812	-0.495925	-0.355397	0.558306	0.337222	0.292761	-0.491357	0.060474	-0.417287	0.630727	0.389732	0.573278	0.454839
+	2.13974	1.41276	P0DOY2;P0DOY3;P0CF74;A0A5H1ZRQ7;A0M8Q6	P0DOY2;P0DOY3;P0CF74	Ig lambda-6 chain C region	IGLC6	190	Color2 [DarkGray]	1	4					+	8	3	3	915	34	34	11293	0	27977	2365600000	7	28	3.96066	0	-0.110571	-1.5755	0.352508	-1.81167	0.320209	0.330254	0.483003	-1.96485	-0.990872	-0.36594	-0.0603877	-1.13008	-1.94345	-1.07657	-1.81096	-1.02529	-1.72097	-2.12346	-1.95399	-1.41653
+	2.13817	0.558974	P62873;C9JIS1;A0A7I2S2S9;A0A6Q8PFV8;A0A6Q8PFE0;A0A6Q8PG88;E7EP32;B1AKQ8;C9JXA5;A0A6Q8PFW8;H7C5J5;F6UT28;F6X3N5;C9JZN1;P62879;Q9HAV0;B3KVK2;F5H100;F5H8J8;F5H0S8;P16520;E9PCP0;C9JD14	P62873;C9JIS1;A0A7I2S2S9;A0A6Q8PFV8;A0A6Q8PFE0;A0A6Q8PG88;E7EP32;B1AKQ8;C9JXA5;A0A6Q8PFW8;H7C5J5;F6UT28;F6X3N5;C9JZN1;P62879;Q9HAV0	Guanine nucleotide-binding protein G(I)/G(S)/G(T) subunit beta-1;Guanine nucleotide-binding protein G(I)/G(S)/G(T) subunit beta-2;Guanine nucleotide-binding protein subunit beta-4	GNB1;GNB2;GNB4	220	Color2 [DarkGray]	1	4					+	3	3	3	97	97	97	37377	0	18687	130170000	13	12	2.79986	0.000450704	-1.17002	-1.06925	-1.1578	-1.79143	-1.30328	-1.2335	-1.278	-1.80744	-1.30629	-1.30469	-1.49652	-1.73478	-1.00285	-1.22454	-1.79018	-1.89727	-1.60897	-2.16874	-1.92162	-1.82798
+	2.07027	1.76908	A0A4W8ZXM2;A0A0B4J1Y9	A0A4W8ZXM2;A0A0B4J1Y9		IGHV3-72	61	Color2 [DarkGray]	1	4					+	4	4	1	455	455	109	11167	0	50666	5422700000	6	53	1.1821	0.0178218	1.15331	0.947186	0.937689	-1.55081	0.580924	0.533184	0.0738212	0.864599	0.561151	0.607281	-1.85678	-1.8988	-1.75871	0.428732	0.665527	0.523052	-0.147558	-0.150456	-1.85855	0.0063696
+	2.01042	-0.549552	E7ETN3;B4E1Z4;P00751;H7C5H1;A0A0G2JH38;H7C526	E7ETN3;B4E1Z4;P00751;H7C5H1	Complement factor B;Complement factor B Ba fragment;Complement factor B Bb fragment	CFB	78	Color2 [DarkGray]	1	4					+	11	11	11	103	103	103	12402	0	74509	1003100000	58	41	3.81057	0	-1.89012	-1.82646	-1.69672	-1.24108	-1.65778	-0.997098	-0.830925	-0.897131	-1.04912	-0.9478	-0.564594	-0.647645	-0.707148	-0.974041	-0.617792	-0.903496	-1.23595	-1.55329	-1.30013	-0.897536
+	1.95587	-0.546515	P19827;F8WAS2;CON__Q0VCM5;H7C5I0;H7C0N0	P19827	Inter-alpha-trypsin inhibitor heavy chain H1	ITIH1	203	Color2 [DarkGray]	1	4					+	8	8	8	115	115	115	10139	0	59904	712560000	33	14	2.23979	0.00141772	-1.97266	-1.07602	-1.0239	-1.8567	-1.90254	-1.7507	-1.43484	-1.1985	-0.916812	-0.79409	-0.525978	-0.943362	-1.10508	-0.975787	-1.26522	-0.97685	-1.3701	-2.37616	-1.90246	-1.18797
+	1.75596	0.993783	B4DNK4;H3BTN5;A0A804F6T5;A0A804F729;P14618;H3BT25;H3BUW1;H3BTJ2;H3BQ34;H3BU13;H3BR70;P30613	B4DNK4;H3BTN5;A0A804F6T5;A0A804F729;P14618;H3BT25;H3BUW1;H3BTJ2;H3BQ34	Pyruvate kinase;Pyruvate kinase PKM	PKM	73	Color2 [DarkGray]	1	4					+	3	3	3	74	74	74	49897	0	28507	949780000	26	12	4.20363	0	-0.741317	0.300864	0.234037	-1.53163	-0.931041	-1.85088	-0.91638	0.0695113	-0.19195	-0.0721716	0.0649052	0.140616	0.0914982	-0.0603926	-2.45388	-0.162207	-1.88684	-1.82023	-1.80368	-1.28113
+	1.66096	-0.542246	E9PFZ2;P00450;H7C5R1;D6RE86;H7C5N5;CON__ENSEMBL:ENSBTAP00000031900	E9PFZ2;P00450;H7C5R1	Ceruloplasmin	CP	106	Color2 [DarkGray]	1	4					+	6	6	6	8	8	8	10882	0	48012	326070000	45	11	1.18169	0.0176471	-1.9258	-2.19178	-1.55647	-2.08804	-1.19074	-1.62986	-1.87892	-1.36357	-1.07391	-1.07762	-0.825794	-1.77394	-2.12555	-1.15284	-1.16291	-1.13857	-1.21109	-1.24479	-1.72165	-1.66891
+	1.61118	1.006	P01717;A0A075B6K0;P01718	P01717;A0A075B6K0;P01718	Ig lambda chain V-IV region Hil;Ig lambda chain V-IV region Kern	IGLV3-16	146	Color2 [DarkGray]	1	4					+	2	1	1	188	98	98	12011	0	19361	1097800000	3	53	1.11367	0.0210385	-0.761136	-0.380171	-0.840696	0.128967	-1.57005	0.233665	-0.279761	-0.947157	-1.25151	-1.16171	-0.317459	-0.432475	-0.18893	-1.37429	-0.767638	-1.33309	-0.27734	-0.362757	-0.480857	-1.84332
[truncated: 14 more columns]

## Sheet: HP - 10SX
Significant	-log(P - value)	Difference	Protein IDs	Majority protein IDs	Protein names	Gene names	id	Symbol color	Symbol type	Symbol size	Show label	Only identified by site	Reverse	Potential contaminant	ANOVA Significant	Peptides	Razor + unique peptides	Unique peptides	Sequence coverage [%]	Unique + razor sequence coverage [%]	Unique sequence coverage [%]	Mol. weight [kDa]	Q-value	Score	Intensity	iBAQ peptides	MS/MS count	#NAME?	ANOVA q-value	LFQ intensity 01	LFQ intensity 01_211116203409	LFQ intensity 01_211116221134	LFQ intensity 02	LFQ intensity 02_211117012617	LFQ intensity 02_211117030340	LFQ intensity 02_211117044104	LFQ intensity 03	LFQ intensity 03_211117075550	LFQ intensity 03_211117093314	LFQ intensity 04	LFQ intensity 04_211117124800	LFQ intensity 04_211117142524	LFQ intensity 05	LFQ intensity 05_211117174036	LFQ intensity 05_211117191758	LFQ intensity 18	LFQ intensity 18_211120085806	LFQ intensity 18_211120103530	LFQ intensity 19
+	11.2626	-0.986136	CON__P02768-1;P02768;A0A0C4DGB6;B7WNR0;H0YA55;D6RHD5;A0A087WWT3;C9JKR2;H7C013	CON__P02768-1;P02768;A0A0C4DGB6;B7WNR0;H0YA55;D6RHD5;A0A087WWT3;C9JKR2	Serum albumin	ALB	89	Color2 [DarkGray]	1	4					+	58	58	52	826	826	77	69366	0	32331	4528400000000000	37	2344	19.6176	0	0.683351	0.766927	0.774505	0.573375	0.648769	0.658416	0.627927	2.09384	2.1467	2.17945	1.96707	1.96132	2.04505	2.24387	2.25635	2.28372	1.73695	1.66308	1.59088	1.46105
+	8.29486	0.485562	P00738;J3QR68;H0Y300;A0A0C4DGL8;J3QLC9;A0A087WU08;H3BS21;J3KTC3;J3KRH2;J3KSV1;J3QQI8;H3BMJ7	P00738;J3QR68;H0Y300;A0A0C4DGL8;J3QLC9;A0A087WU08	Haptoglobin;Haptoglobin alpha chain;Haptoglobin beta chain	HP	126	Color2 [DarkGray]	1	4					+	23	23	11	51	51	31	45205	0	30994	62753000000	20	552	9.8247	0	1.2731	1.32705	1.25496	1.2244	1.22388	1.26416	1.4014	0.92313	0.777378	0.800889	1.26551	1.02633	1.00438	0.675526	0.807583	0.754549	0.82692	0.820896	0.799308	0.91806
+	7.68063	0.71245	A1L4H1;M0QZ17	A1L4H1	Soluble scavenger receptor cysteine-rich domain-containing protein SSC5D	SSC5D	74	Color2 [DarkGray]	1	4					+	15	15	15	121	121	121	16574	0	32331	4224300000	61	155	10.8881	0	0.11332	0.233953	0.0847153	0.225833	0.014313	0.209275	0.204388	-0.55017	-0.777155	-0.83432	-0.260354	-0.364232	-0.488485	-0.792438	-0.484366	-0.503175	-0.494844	-0.58244	-0.62509	-0.687207
+	7.23453	0.439449	Q9Y6R7;A0A087WXI2;A0A087WUZ2	Q9Y6R7;A0A087WXI2	IgGFc-binding protein	FCGBP	12	Color2 [DarkGray]	1	4					+	34	34	34	134	134	134	57201	0	2964	8130500000	163	293	4.5562	0	0.204078	0.301578	0.215071	0.134405	0.178719	0.203242	0.0937283	-0.197017	-0.309379	-0.325839	0.0389155	-0.00529838	-0.004549	-0.809861	-0.587305	-0.81174	-0.17877	-0.199229	-0.301927	-0.442821
+	6.43734	-1.49188	Q13790	Q13790	Apolipoprotein F	APOF	229	Color2 [DarkGray]	1	4					+	4	4	4	23	23	23	35399	0	11142	26018000000	13	48	8.79153	0	-0.616649	-0.56289	-0.52644	-1.25147	-0.719361	-0.521791	-0.623477	1.30996	1.93865	1.90868	0.0670965	0.90387	1.06108	1.85444	1.98238	1.90341	0.88744	1.02602	1.21234	0.259385
+	5.45835	0.638144	P06727	P06727	Apolipoprotein A-IV	APOA4	181	Color2 [DarkGray]	1	4					+	20	20	19	427	427	399	45371	0	1554	4639500000	25	166	7.8621	0	-0.217552	-0.126721	-0.300944	0.0518415	0.00660335	0.139958	0.0139833	-0.595692	-0.55613	-0.692806	-0.211916	-0.424217	-0.444301	-0.609354	-0.56133	-0.775312	-0.671802	-0.521956	-0.518861	-0.291155
+	4.59728	0.926784	E7EX29;P63104;E7ESK7;E5RGE1;E5RIR4;E9PD24;E7EVZ2;B0AZS6;B7Z2E6;H0YB80	E7EX29;P63104;E7ESK7;E5RGE1;E5RIR4;E9PD24;E7EVZ2;B0AZS6	14-3-3 protein zeta/delta	YWHAZ	103	Color2 [DarkGray]	1	4					+	6	6	5	268	268	228	28036	0	86745	450130000	14	22	10.7116	0	-0.656618	-0.627886	-0.830266	-0.947952	-0.951876	-1.08421	-0.710363	-1.11445	-0.866123	-0.818103	-0.845949	-1.01991	-0.844519	-0.707141	-0.98085	-0.986582	-1.77679	-1.34132	-1.56916	-1.99433
+	4.37571	-0.843312	P02654;K7ERI9;K7EJI9;K7ELM9;K7EPF9;K7EKP1	P02654;K7ERI9;K7EJI9;K7ELM9;K7EPF9	Apolipoprotein C-I;Truncated apolipoprotein C-I	APOC1	154	Color2 [DarkGray]	1	4					+	9	9	9	542	542	542	93318	0	82991	1669900000000000	3	759	10.1776	0	1.54097	1.558	1.77147	1.11838	0.951343	1.05424	1.20891	1.19002	1.11044	1.02745	1.29394	1.28995	1.11645	0.969122	1.18967	1.13223	1.58082	1.54735	1.48085	1.13687
+	4.21162	1.53859	P01709;P01706	P01709;P01706	Ig lambda chain V-II region MGC;Ig lambda chain V-II region BOH		144	Color2 [DarkGray]	1	4					+	2	2	2	11	11	11	12382	0	25105	801060000	2	11	6.27223	0	-0.70896	-0.645691	-0.732526	0.850479	-0.196598	-0.110607	-0.250229	-1.56812	-2.02691	-1.31621	-1.00975	-2.05078	-2.16984	-1.60899	-1.34516	-2.19613	-0.767905	-0.804045	-0.760005	-1.44696
+	4.21063	-0.699353	A0A096LPE2;P35542	A0A096LPE2;P35542	Serum amyloid A-4 protein	SAA2-SAA4;SAA4	16	Color2 [DarkGray]	1	4					+	5	5	5	255	255	255	23353	0	4556	37791000000	12	225	7.53377	0	1.15066	0.818053	1.1161	0.377311	0.816433	0.618103	0.814129	0.958662	0.671645	0.780495	0.558595	1.10033	1.02154	0.882035	0.98276	0.930924	1.31244	1.26213	1.18738	1.04717
+	4.05081	0.489017	Q08380;K7EP36;K7ESM3;K7EKQ5;K7EJY8;K7ES75;K7EN99;K7ERZ6;K7EJD3	Q08380	Galectin-3-binding protein	LGALS3BP	227	Color2 [DarkGray]	1	4					+	15	15	15	274	274	274	6533	0	1927	21315000000	26	339	6.06271	0	1.10914	1.00865	1.13647	0.771648	0.740234	0.659782	0.895538	0.56088	0.349075	0.34932	0.674214	0.654858	0.580881	0.0486632	0.332848	0.152523	0.454279	0.494231	0.459008	0.0496329
+	3.77963	0.364873	P02686;H0YF02;J3QQK6;H7BYR8;A8MZH3;J3QKL5;J3QL64;E9PMR5;H0YEA2;E9PJ72;E9PKX9;E9PNZ1;F8WEU6;F5H7N4;J3KT34;E9PLQ9;C9J6H1;J3KS94;E9PQE7;J3KT01;E9PSE2;E9PLU9	P02686;H0YF02;J3QQK6;H7BYR8;A8MZH3;J3QKL5;J3QL64;E9PMR5;H0YEA2;E9PJ72;E9PKX9;E9PNZ1;F8WEU6;F5H7N4;J3KT34	Myelin basic protein	MBP	76	Color2 [DarkGray]	1	4					+	4	4	4	118	118	118	33117	0	357	2602000000	14	138	6.20879	0	0.0496344	0.13177	-0.125139	-0.2374	-0.199696	-0.241434	-0.161603	-0.178993	0.005536	0.0262824	-0.216466	-0.462505	-0.327318	0.0804853	-0.315069	-0.104905	-0.410413	-0.418875	-0.407013	-0.562406
+	3.66807	-0.471956	O95445	O95445	Apolipoprotein M	APOM	125	Color2 [DarkGray]	1	4					+	8	8	1	383	383	53	21253	0	68406	41672000000	10	274	12.3523	0	0.24709	-0.0407666	0.24218	-0.0887486	0.18477	-0.0737901	0.361625	2.09462	2.15639	2.14708	1.85647	1.30207	1.25468	2.24718	2.10966	2.33743	0.802951	1.19623	1.19023	0.912241
+	3.58875	-1.09281	J3KNB4;P49913	J3KNB4;P49913	Cathelicidin antimicrobial peptide;Antibacterial protein FALL-39;Antibacterial protein LL-37	CAMP	118	Color2 [DarkGray]	1	4					+	7	7	7	358	358	358	19591	0	19076	14968000000	9	173	9.86106	0	-0.068882	-1.10787	-0.11327	-0.0826048	-0.0072663	0.106153	-0.979463	-0.472448	-0.654722	-0.706236	0.0799984	-0.0527754	-0.117929	-0.83377	-0.333817	-0.556618	0.765093	0.661404	0.660212	1.0212
+	3.57647	0.345614	P02649;H0Y7L5;E9PEV4;E7ERP7;CON__Q03247	P02649;H0Y7L5;E9PEV4;E7ERP7	Apolipoprotein E	APOE	152	Color2 [DarkGray]	1	4					+	33	33	33	785	785	785	36154	0	32331	3703600000000000	22	1428	11.0145	0	2.18696	2.18487	2.21747	1.88103	1.87893	1.88486	2.03509	1.95048	1.92681	1.98758	2.02561	1.89853	1.90332	1.86436	1.96856	1.93562	1.60013	1.59258	1.54039	1.44219
+	3.46809	0.345435	O43866	O43866	CD5 antigen-like	CD5L	122	Color2 [DarkGray]	1	4					+	18	18	18	588	588	588	38087	0	27456	48632000000	18	349	8.33563	0	1.51387	1.47717	1.50795	1.33735	1.52112	1.54269	1.09993	1.18959	1.27372	1.24731	1.27844	1.34211	1.32183	1.00037	0.982201	1.054	1.00597	1.01406	0.949141	0.764412
+	3.30621	-0.627977	P02790;Q9BS19	P02790;Q9BS19	Hemopexin	HPX	165	Color2 [DarkGray]	1	4					+	8	8	8	223	223	223	51676	0	63724	1934400000	22	76	5.73274	0	-1.84411	-1.30799	-1.3971	-1.65593	-0.917178	-1.46965	-1.22928	-0.362759	-0.19093	-0.230585	-0.273942	-0.749622	-0.547855	-0.284024	-0.353856	-0.263809	-0.800039	-0.624654	-1.13519	-0.939473
+	2.94839	-0.670849	Q15485	Q15485	Ficolin-2	FCN2	232	Color2 [DarkGray]	1	4					+	9	9	9	294	294	294	34001	0	18567	3670500000	14	96	2.05221	0.00228571	-1.48031	-0.974434	-0.986011	-0.704405	-0.539742	-0.484928	-0.566828	-0.860177	-1.04383	-1.28409	-0.0672637	-0.407408	-0.197097	0.479761	0.559764	0.556853	0.00687433	0.128943	0.0946475	-0.471372
+	2.90122	-0.420929	P01857;A0A0A0MS08;A0A0A0MS07	P01857;A0A0A0MS08;A0A0A0MS07	Ig gamma-1 chain C region	IGHG1	20	Color2 [DarkGray]	1	4					+	12	12	6	479	479	279	36105	0	19422	25972000000	15	178	9.60442	0	0.216755	0.231678	0.197263	-0.417059	0.120765	0.207712	0.202882	1.35846	1.25414	1.23377	0.770558	0.796526	0.956958	1.30004	1.33875	1.31519	0.289278	0.378311	0.358192	0.519167
+	2.82679	0.374356	P04275	P04275	von Willebrand factor;von Willebrand antigen 2	VWF	173	Color2 [DarkGray]	1	4					+	100	100	100	426	426	426	30926	0	32331	3811300000000000	132	3174	6.5643	0	1.96376	1.96939	1.95818	1.49322	1.55468	1.60175	1.66334	1.62427	1.52903	1.55097	1.63179	1.50742	1.51097	1.75426	1.79448	1.78692	1.30449	1.32291	1.26794	1.26002
+	2.70737	1.67927	P0DOY2;P0DOY3;P0CF74;A0A5H1ZRQ7;A0M8Q6	P0DOY2;P0DOY3;P0CF74	Ig lambda-6 chain C region	IGLC6	190	Color2 [DarkGray]	1	4					+	8	3	3	915	34	34	11293	0	27977	2365600000	7	28	3.96066	0	-0.110571	-1.5755	0.352508	-1.81167	0.320209	0.330254	0.483003	-1.96485	-0.990872	-0.36594	-0.0603877	-1.13008	-1.94345	-1.07657	-1.81096	-1.02529	-1.72097	-2.12346	-1.95399	-1.41653
+	2.59303	0.553744	A0A0B4J1V0	A0A0B4J1V0		IGHV3-15	27	Color2 [DarkGray]	1	4					+	4	2	2	261	126	126	12926	0	22265	488290000	7	21	4.42092	0	-1.00408	-0.828212	-1.17308	-0.487464	-0.404809	-0.47815	-0.502189	-1.35679	-1.67018	-2.00103	-0.657753	-1.00236	-0.848081	-1.76039	-1.50829	-1.67024	-1.70897	-1.89141	-0.954849	-1.49381
+	2.47332	-1.27076	P02749;J3QRN2;J3QLI0;J3KS17	P02749;J3QRN2	Beta-2-glycoprotein 1	APOH	159	Color2 [DarkGray]	1	4					+	7	7	7	243	243	243	38298	0	50793	3018900000	17	46	4.09814	0	-1.82615	-0.0923517	-0.492764	-2.19063	-1.70442	-0.534756	-1.71557	-0.474751	-0.70029	-0.437861	-0.73657	-0.378949	-1.92995	-0.623857	-0.535059	-0.855429	0.400808	0.490849	0.399801	-1.05296
+	2.39928	0.755004	P40926;G3XAL0	P40926;G3XAL0	Malate dehydrogenase, mitochondrial;Malate dehydrogenase	MDH2	210	Color2 [DarkGray]	1	4					+	6	6	6	228	228	228	35503	0	57648	454790000	20	13	4.69532	0	-0.680327	-0.779613	-0.421925	-0.857709	-1.69039	-1.47332	-1.42881	-0.736687	-0.33201	-0.485092	-2.25667	-0.759793	-1.41325	-0.330482	-0.701126	-0.356238	-2.07309	-2.31701	-2.05173	-1.70628
+	2.319	-1.77709	P55056	P55056	Apolipoprotein C-IV	APOC4	213	Color2 [DarkGray]	1	4					+	5	3	3	244	157	157	14553	0	31613	4882400000	6	70	1.84035	0.00311111	0.275839	-1.16844	0.218922	-2.12981	-2.30234	-1.8358	-2.12665	-0.426375	-0.342327	-0.393775	-1.63411	-1.61961	-1.30115	-0.41132	-0.109682	-0.121312	-0.988998	-0.910433	-0.879913	-1.61867
+	2.22095	0.435782	P02671;A0A087WUA0	P02671	Fibrinogen alpha chain;Fibrinopeptide A;Fibrinogen alpha chain	FGA	155	Color2 [DarkGray]	1	4					+	21	21	21	311	311	311	94972	0	23599	8528000000	35	172	3.37768	0.000135593	-0.136785	-0.234089	-0.247106	0.216978	0.368091	0.368055	0.182338	0.0741601	-0.0887185	-0.0896434	-0.0664589	0.413908	0.386966	-0.0576874	0.17202	0.0782862	0.196892	0.109567	0.0314943	-0.247825
+	2.18469	0.645862	O14791;B1AH96	O14791	Apolipoprotein L1	APOL1	121	Color2 [DarkGray]	1	4					+	10	10	10	241	241	241	43974	0	11428	10381000000	19	217	3.61547	0	0.238154	0.24637	-0.00809899	1.05003	0.939158	1.14034	0.796223	-0.0301812	-0.495925	-0.355397	0.558306	0.337222	0.292761	-0.491357	0.060474	-0.417287	0.630727	0.389732	0.573278	0.454839
+	2.14474	-1.24767	P01624;A0A0C4DH90;A0A075B6H7;A0A0C4DH55	P01624;A0A0C4DH90;A0A075B6H7;A0A0C4DH55	Ig kappa chain V-III region POM	IGKV3OR2-268;IGKV3-7;IGKV3D-7	141	Color2 [DarkGray]	1	4					+	2	2	1	261	261	78	12496	0	1348	1866500000	3	19	2.85255	0.000405797	-1.75415	-2.0241	-1.87888	-2.1173	-1.55434	-1.78666	-1.96283	-2.01757	-1.82627	-2.20088	0.0465554	0.137752	0.136477	-0.195759	0.0637488	-0.0996626	-1.65713	-1.70587	-2.24523	-2.0616
+	1.47657	0.850508	B4DNK4;H3BTN5;A0A804F6T5;A0A804F729;P14618;H3BT25;H3BUW1;H3BTJ2;H3BQ34;H3BU13;H3BR70;P30613	B4DNK4;H3BTN5;A0A804F6T5;A0A804F729;P14618;H3BT25;H3BUW1;H3BTJ2;H3BQ34	Pyruvate kinase;Pyruvate kinase PKM	PKM	73	Color2 [DarkGray]	1	4					+	3	3	3	74	74	74	49897	0	28507	949780000	26	12	4.20363	0	-0.741317	0.300864	0.234037	-1.53163	-0.931041	-1.85088	-0.91638	0.0695113	-0.19195	-0.0721716	0.0649052	0.140616	0.0914982	-0.0603926	-2.45388	-0.162207	-1.88684	-1.82023	-1.80368	-1.28113
[truncated: 14 more columns]

## Sheet: All pairs significant
Gene names	HP - MLPH	Gene names	HP - 5SX	Gene names	HP - 10SX	Gene names	MLPH - 5SX	Gene names	MLPH - 10SX	Gene names	5SX - 10SX
ACTG1	0.681484	ACTG1	0.324665	ALB	-0.986136	APOB	-0.262974	A2M	0.371251	APOD	0.4591
ALB	-0.914729	ALB	-1.21034	APOA4	0.638144	APOC1	-0.512082	APOB	-0.318335	SERPINA1	0.467822
ALDOA	0.385336	APOA4	0.682078	APOC1	-0.843312	APOC3	-0.394792	APOC1	-0.772059	C3	0.746841
AMBP	0.404516	APOC1	-0.583336	APOC4	-1.77709	APOC4-APOC2;APOC2	-0.57014	APOC3	-0.331643	IGHG3	0.374152
APOA1	0.428737	APOE	0.40052	APOE	0.345614	APOD	0.482132	APOC4	-1.76262	A2M	0.500747
APOA4	0.393628	APOF	-1.89071	APOF	-1.49188	APOL1	0.505652	APOC4-APOC2;APOC2	-0.63263	C1QC	0.586566
APOD	-0.720216	APOH	-1.53146	APOH	-1.27076	C1QC	-0.976655	APOD	0.941231	ITIH2	0.759008
APOE	0.517968	APOL1	0.660306	APOL1	0.645862	C3	-0.562495	APOL1	0.491209	HBA1;HBA2	-0.403408
APOF	-1.44828	APOM	-0.985729	APOM	-0.471956	C4BPA	0.428679	APOM	0.49051	APOM	0.513773
APOH	-1.13063	C1QC	-0.903928	CAMP	-1.09281	C4BPB	0.714273	ATP1A3;ATP1A2;ATP1A1	-0.577143	IGHG1	0.415368
APOM	-0.962466	C3	-0.598285	CD5L	0.345435	COLEC11	-0.642232	C1R	-0.406946	CFB	0.774891
ATP1A3;ATP1A2;ATP1A1	0.598445	C4BPB	0.490903	FCGBP	0.439449	GAPDH	-0.898351	C4B;C4A	0.255567	ITIH4	0.732245
C1R	0.647871	CAMP	-1.18539	FCN2	-0.670849	IGHG1	-0.500944	C4BPA	0.326911	IGHV3-15	-0.593645
C1S	0.714882	CD5L	0.575095	FGA	0.435782	IGHV3-21	-1.77571	C4BPB	0.436192	PLG	0.626793
C4BPA	-0.701117	CFB	-0.549552	HP	0.485562	IGKV3OR2-268;IGKV3-7;IGKV3D-7	-1.49203	CFB	0.623725	ITIH1	0.727795
CAMP	-1.08988	CP	-0.542246	HPX	-0.627977	IGLV8-61	1.00884	CNP	-0.568611	IGLV3-10	-1.17798
CD5L	0.493486	FCGBP	0.542356	IGHG1	-0.420929	ORM1	0.453505	COLEC11	-0.673862	IGHV5-51	0.74313
CLU	0.357046	FCN2	-0.760413	IGHV3-15	0.553744	PF4;PF4V1	-0.852114	FGA	0.394115
COLEC11	0.438705	GNB1;GNB2;GNB4	0.558974	IGKV3OR2-268;IGKV3-7;IGKV3D-7	-1.24767	PLG	-0.613495	GNB1;GNB2;GNB4	-0.451433
FCGBP	0.48187	HP	0.674164	IGLC6	1.67927	PLP1	-0.744783	HIST1H4A	-0.503804
FCN2	-0.833854	HPX	-0.898745	LGALS3BP	0.489017	PROS1	0.827048	HPR	-1.44917
GAPDH	1.05726	IGHG1	-0.836296	MBP	0.364873	SERPINA1	-0.44105	IGHA1	-0.346512
GNB1;GNB2;GNB4	0.681383	IGHV3-15	1.14739	MDH2	0.755004	TF	0.322786	IGHM	-0.305576
HP	0.450695	IGHV3-72	1.76908	PKM	0.850508	TUBA1B	-0.639113	IGHV3-21	-1.88741
HPR	1.13375	IGHV3-74;IGHV3OR16-13	0.36162	SAA2-SAA4;SAA4	-0.699353	VIM	-0.452329	IGHV5-51	0.781274
HRG	0.306695	IGJ;JCHAIN	0.373307	SSC5D	0.71245			IGHV6-1	-1.07008
HSPA8;HSPA2	0.414619	IGKV3OR2-268;IGKV3-7;IGKV3D-7	-1.44369	VWF	0.374356			IGKC	-0.341859
IGHA1	0.402392	IGLC6	1.41276	YWHAZ	0.926784			IGKV2-24;IGKV2D-24	-0.798096
IGHM	0.436295	IGLL5;IGLC1	0.346594		1.53859			IGKV3OR2-268;IGKV3-7;IGKV3D-7	-1.29601
IGHV3-15	0.852407	IGLV3-16	1.006					IGLV3-10	-1.57243
IGHV3-21	1.21036	ITIH1	-0.546515					LDHB;LDHC;LDHAL6A;LDHA	-0.455756
IGJ;JCHAIN	0.447098	LGALS3BP	0.661301					ORM1	0.724828
IGKC	0.379374	MBP	0.466202					PF4;PF4V1	-0.995493
IGLC6	1.57309	MDH2	0.838198					PLP1	-0.880797
IGLL5;IGLC1	0.369594	PKM	0.993783					PROS1	0.579055
IGLV3-10	0.967126	PLG	-0.618181					SAA2-SAA4;SAA4	-0.372949
LGALS3BP	0.57165	PON1	-0.646191					TF	0.622783
MBP	0.357881	PROS1	0.525022					THBS1	-0.312802
MDH2	0.886427	SAA2-SAA4;SAA4	-0.659093					TUBA1B	-0.758554
ORM1	-0.630525	SERPINA1	-0.455304					TUBB4B	-0.960724
PKM	0.955657	SERPINC1	-0.462012					VIM	-0.574879
SSC5D	0.79892	SSC5D	0.701819						0.601944
TF	-1.09549	TF	-0.772699						1.16808
TUBA1B	0.851125	TNC	0.327633
TUBB4B	0.932198	VWF	0.387349
VWF	0.473112	YWHAZ	1.23391
YWHAZ	0.961815		1.49788
	0.936645

## Sheet: 5SX - 10SX
Significant	-log(P - value)	Difference	Protein IDs	Majority protein IDs	Protein names	Gene names	id	Symbol color	Symbol type	Symbol size	Show label	Only identified by site	Reverse	Potential contaminant	ANOVA Significant	Peptides	Razor + unique peptides	Unique peptides	Sequence coverage [%]	Unique + razor sequence coverage [%]	Unique sequence coverage [%]	Mol. weight [kDa]	Q-value	Score	Intensity	iBAQ peptides	MS/MS count	#NAME?	ANOVA q-value	LFQ intensity 01	LFQ intensity 01_211116203409	LFQ intensity 01_211116221134	LFQ intensity 02	LFQ intensity 02_211117012617	LFQ intensity 02_211117030340	LFQ intensity 02_211117044104	LFQ intensity 03	LFQ intensity 03_211117075550	LFQ intensity 03_211117093314	LFQ intensity 04	LFQ intensity 04_211117124800	LFQ intensity 04_211117142524	LFQ intensity 05	LFQ intensity 05_211117174036	LFQ intensity 05_211117191758	LFQ intensity 18	LFQ intensity 18_211120085806	LFQ intensity 18_211120103530	LFQ intensity 19
+	5.61375	0.4591	C9JF17;P05090;C9JX71;F8WBT9	C9JF17;P05090	Apolipoprotein D	APOD	83	Color2 [DarkGray]	1	4					+	7	7	7	265	265	265	24158	0	18923	32981000000	11	237	13.4361	0	0.435938	0.483329	0.390839	0.64187	0.685716	0.640997	0.542487	0.211444	-0.0166452	0.00212351	0.465874	0.452863	0.407067	0.107279	0.48225	0.19458	1.33276	1.26521	1.2439	1.2855
+	5.47803	0.467822	A0A024R6I7;P01009;A0A0G2JRN3;G3V2B9;G3V5R8;G3V387;A0A0B4J278;G3V544	A0A024R6I7;P01009;A0A0G2JRN3	Alpha-1-antitrypsin;Short peptide from AAT	SERPINA1	0	Color2 [DarkGray]	1	4					+	19	19	19	428	428	428	46708	0	22589	18887000000	23	203	11.2343	0	-0.103985	0.120362	0.169686	0.217557	0.533791	0.180969	0.461165	1.07483	0.993909	1.02156	0.898603	0.671442	0.933388	1.07413	1.07671	1.04522	0.101369	0.1809	0.384326	0.0679249
+	4.59271	0.746841	P01024;M0QYC8;M0QXZ3;M0R0Q9;M0R1Q1;O95568	P01024	Complement C3;Complement C3 beta chain;C3-beta-c;Complement C3 alpha chain;C3a anaphylatoxin;Acylation stimulating protein;Complement C3b alpha chain;Complement C3c alpha chain fragment 1;Complement C3dg fragment;Complement C3g fragment;Complement C3d fragment;Complement C3f fragment;Complement C3c alpha chain fragment 2	C3	133	Color2 [DarkGray]	1	4					+	78	78	69	509	509	469	18715	0	32331	45744000000	95	923	8.49626	0	-0.348543	-0.29215	-0.435359	0.214505	0.212642	0.193215	-0.224306	0.637418	0.560077	0.551947	0.487522	0.60288	0.616759	0.711031	0.803703	0.78463	-0.176764	-0.224211	-0.225939	-0.135299
+	4.30982	0.374152	A0A286YES1;A0A4W9A917;P01860	A0A286YES1;A0A4W9A917;P01860	Ig gamma-3 chain C region	IGHG3	55	Color2 [DarkGray]	1	4					+	11	5	3	327	204	141	49021	0	54165	5692000000	19	105	0.960985	0.0306055	0.0637881	0.061246	0.111858	0.650671	0.796198	0.63862	0.204679	0.447364	0.179097	0.200229	0.597386	0.676581	0.685903	0.439647	0.733581	0.455016	0.374498	0.487206	0.442307	-1.04632
+	4.00216	0.500747	P01023;P20742;H0YFH1;F8W7L3;CON__ENSEMBL:ENSBTAP00000024146	P01023	Alpha-2-macroglobulin	A2M	132	Color2 [DarkGray]	1	4					+	42	42	42	35	35	35	16329	0	32331	20075000000	69	385	7.4422	0	-0.031193	0.00514143	-0.0153363	0.320602	0.31675	0.313446	0.216521	0.613061	0.492981	0.551693	0.625038	0.554739	0.551925	0.592642	0.653695	0.616394	0.11763	0.138224	0.11181	0.520052
+	3.92161	0.586566	P02747	P02747	Complement C1q subcomponent subunit C	C1QC	158	Color2 [DarkGray]	1	4					+	5	5	5	253	253	253	25773	0	40975	1721200000	13	58	5.21428	0	-0.840655	-0.89626	-0.871731	-1.80339	-1.09961	-1.53453	-1.34486	-0.307663	-0.736068	-0.464091	-0.373802	-0.594558	-0.631248	-0.367238	-0.299934	-0.494965	-1.07367	-0.978144	-1.07125	-1.97768
+	3.80998	0.759008	Q5T985;P19823;Q5T987;CON__Q9TRI1	Q5T985;P19823	Inter-alpha-trypsin inhibitor heavy chain H2	ITIH2	202	Color2 [DarkGray]	1	4					+	15	15	15	176	176	176	10521	0	16818	1710800000	47	84	2.10719	0.00205	-1.5168	-1.12531	-0.854003	-0.440918	-0.555885	-0.704239	-0.86168	-0.642892	-1.01425	-0.699679	-0.372558	-0.42295	-0.491662	-0.622076	-0.568023	-0.655981	-1.56683	-1.32353	-2.26477	-0.281117
+	3.52728	-0.403408	P69905;A0A2R8Y7C0;G3V1N2	P69905;A0A2R8Y7C0;G3V1N2	Hemoglobin subunit alpha	HBA1;HBA2	226	Color2 [DarkGray]	1	4						6	6	4	521	521	394	15257	0	17031	5728300000	8	143	0.808035	0.0502857	0.477411	0.0833381	0.418041	0.28172	0.620882	0.594006	-0.912877	-0.20283	-0.234352	-0.241884	0.629247	0.162321	0.153668	-0.232494	0.109345	-0.0548075	0.289885	0.404474	0.147986	-1.29937
+	3.44637	0.513773	O95445	O95445	Apolipoprotein M	APOM	125	Color2 [DarkGray]	1	4					+	8	8	1	383	383	53	21253	0	68406	41672000000	10	274	12.3523	0	0.24709	-0.0407666	0.24218	-0.0887486	0.18477	-0.0737901	0.361625	2.09462	2.15639	2.14708	1.85647	1.30207	1.25468	2.24718	2.10966	2.33743	0.802951	1.19623	1.19023	0.912241
+	2.85796	0.415368	P01857;A0A0A0MS08;A0A0A0MS07	P01857;A0A0A0MS08;A0A0A0MS07	Ig gamma-1 chain C region	IGHG1	20	Color2 [DarkGray]	1	4					+	12	12	6	479	479	279	36105	0	19422	25972000000	15	178	9.60442	0	0.216755	0.231678	0.197263	-0.417059	0.120765	0.207712	0.202882	1.35846	1.25414	1.23377	0.770558	0.796526	0.956958	1.30004	1.33875	1.31519	0.289278	0.378311	0.358192	0.519167
+	2.52294	0.774891	E7ETN3;B4E1Z4;P00751;H7C5H1;A0A0G2JH38;H7C526	E7ETN3;B4E1Z4;P00751;H7C5H1	Complement factor B;Complement factor B Ba fragment;Complement factor B Bb fragment	CFB	78	Color2 [DarkGray]	1	4					+	11	11	11	103	103	103	12402	0	74509	1003100000	58	41	3.81057	0	-1.89012	-1.82646	-1.69672	-1.24108	-1.65778	-0.997098	-0.830925	-0.897131	-1.04912	-0.9478	-0.564594	-0.647645	-0.707148	-0.974041	-0.617792	-0.903496	-1.23595	-1.55329	-1.30013	-0.897536
+	2.45216	0.732245	Q14624;B7ZKJ8;H7C0L5;CON__Q3T052	Q14624;B7ZKJ8;H7C0L5	Inter-alpha-trypsin inhibitor heavy chain H4;70 kDa inter-alpha-trypsin inhibitor heavy chain H4;35 kDa inter-alpha-trypsin inhibitor heavy chain H4	ITIH4	231	Color2 [DarkGray]	1	4					+	10	10	10	113	113	113	10336	0	88549	767270000	44	40	2.59389	0.000533333	-1.42405	-1.48268	-1.08606	-0.87815	-0.835682	-1.03747	-1.12306	-0.866887	-1.20324	-1.05462	-0.495672	-0.906229	-0.668541	-1.22061	-0.84157	-0.90007	-1.0849	-1.24713	-2.14423	-2.01387
+	2.39045	-0.593645	A0A0B4J1V0	A0A0B4J1V0		IGHV3-15	27	Color2 [DarkGray]	1	4					+	4	2	2	261	126	126	12926	0	22265	488290000	7	21	4.42092	0	-1.00408	-0.828212	-1.17308	-0.487464	-0.404809	-0.47815	-0.502189	-1.35679	-1.67018	-2.00103	-0.657753	-1.00236	-0.848081	-1.76039	-1.50829	-1.67024	-1.70897	-1.89141	-0.954849	-1.49381
+	2.29726	0.626793	P00747	P00747	Plasminogen;Plasmin heavy chain A;Activation peptide;Angiostatin;Plasmin heavy chain A, short form;Plasmin light chain B	PLG	128	Color2 [DarkGray]	1	4					+	4	4	4	7	7	7	90568	0	25214	383750000	43	13	4.79072	0	-1.75478	-1.82459	-1.65285	-2.07893	-1.50602	-1.07323	-1.93219	-0.89685	-1.00155	-1.14745	-0.62867	-0.7514	-0.721335	-0.992364	-0.63423	-0.996918	-2.12787	-1.0149	-1.06459	-2.16009
+	2.11244	0.727795	P19827;F8WAS2;CON__Q0VCM5;H7C5I0;H7C0N0	P19827	Inter-alpha-trypsin inhibitor heavy chain H1	ITIH1	203	Color2 [DarkGray]	1	4					+	8	8	8	115	115	115	10139	0	59904	712560000	33	14	2.23979	0.00141772	-1.97266	-1.07602	-1.0239	-1.8567	-1.90254	-1.7507	-1.43484	-1.1985	-0.916812	-0.79409	-0.525978	-0.943362	-1.10508	-0.975787	-1.26522	-0.97685	-1.3701	-2.37616	-1.90246	-1.18797
+	1.67624	-1.17798	A0A075B6K4;P01715	A0A075B6K4		IGLV3-10	2	Color2 [DarkGray]	1	4					+	3	3	2	165	165	165	12441	0	1809	1147900000	4	29	2.62089	0.000540541	-0.724587	-1.67415	0.240456	-0.626089	-1.42234	-0.820275	-2.06341	-0.849136	-0.54161	-0.690403	-1.8184	-1.46013	-1.844	-1.04425	-0.848985	-0.847043	-1.7144	-2.24284	-2.04872	-1.42854
+	1.63567	0.74313	A0A0C4DH38;A0A0J9YXX1	A0A0C4DH38;A0A0J9YXX1		IGHV5-51	41	Color2 [DarkGray]	1	4					+	3	3	3	342	342	342	12674	0	25763	1310800000	6	28	0.8427	0.0451171	-0.112061	-0.0522377	-0.176686	-1.629	-1.80904	-1.73695	-2.12604	-1.8603	-0.92455	-1.00874	-0.305108	-0.258548	-0.408863	-1.16784	-0.717316	-1.20046	-0.452598	-0.46032	-0.467506	-1.03713
[truncated: 14 more columns]

## Sheet: MLPH - 10SX
Significant	-log(P - value)	Difference	Protein IDs	Majority protein IDs	Protein names	Gene names	id	Symbol color	Symbol type	Symbol size	Show label	Only identified by site	Reverse	Potential contaminant	ANOVA Significant	Peptides	Razor + unique peptides	Unique peptides	Sequence coverage [%]	Unique + razor sequence coverage [%]	Unique sequence coverage [%]	Mol. weight [kDa]	Q-value	Score	Intensity	iBAQ peptides	MS/MS count	#NAME?	ANOVA q-value	LFQ intensity 01	LFQ intensity 01_211116203409	LFQ intensity 01_211116221134	LFQ intensity 02	LFQ intensity 02_211117012617	LFQ intensity 02_211117030340	LFQ intensity 02_211117044104	LFQ intensity 03	LFQ intensity 03_211117075550	LFQ intensity 03_211117093314	LFQ intensity 04	LFQ intensity 04_211117124800	LFQ intensity 04_211117142524	LFQ intensity 05	LFQ intensity 05_211117174036	LFQ intensity 05_211117191758	LFQ intensity 18	LFQ intensity 18_211120085806	LFQ intensity 18_211120103530	LFQ intensity 19
+	10.2873	0.941231	C9JF17;P05090;C9JX71;F8WBT9	C9JF17;P05090	Apolipoprotein D	APOD	83	Color2 [DarkGray]	1	4					+	7	7	7	265	265	265	24158	0	18923	32981000000	11	237	13.4361	0	0.435938	0.483329	0.390839	0.64187	0.685716	0.640997	0.542487	0.211444	-0.0166452	0.00212351	0.465874	0.452863	0.407067	0.107279	0.48225	0.19458	1.33276	1.26521	1.2439	1.2855
+	6.01847	0.326911	P04003;A6PVY5;F2Z2V7	P04003	C4b-binding protein alpha chain	C4BPA	167	Color2 [DarkGray]	1	4					+	25	25	25	561	561	561	67033	0	29558	69998000000	30	450	3.4366	0.000137931	1.11414	1.2169	1.41155	0.319451	0.49214	0.620661	0.601407	1.18526	1.25827	1.30728	1.10398	1.53444	1.19697	1.10569	0.81278	0.952912	1.58241	1.61122	1.53835	1.53757
+	5.90308	0.436192	P20851;Q5VVQ7	P20851	C4b-binding protein beta chain	C4BPB	204	Color2 [DarkGray]	1	4					+	6	6	6	274	274	274	28357	0	75595	18079000000	14	99	4.2278	0	0.41269	0.535469	0.37981	0.921902	1.09089	0.874565	1.05586	0.186785	-0.153016	-0.0769958	0.82185	0.647708	0.687897	-0.588485	-0.059608	-0.358268	1.00237	0.927283	0.822711	1.03862
+	5.68423	-0.772059	P02654;K7ERI9;K7EJI9;K7ELM9;K7EPF9;K7EKP1	P02654;K7ERI9;K7EJI9;K7ELM9;K7EPF9	Apolipoprotein C-I;Truncated apolipoprotein C-I	APOC1	154	Color2 [DarkGray]	1	4					+	9	9	9	542	542	542	93318	0	82991	1669900000000000	3	759	10.1776	0	1.54097	1.558	1.77147	1.11838	0.951343	1.05424	1.20891	1.19002	1.11044	1.02745	1.29394	1.28995	1.11645	0.969122	1.18967	1.13223	1.58082	1.54735	1.48085	1.13687
+	5.15086	-0.318335	P04114;A8MUN2;A0A669KB70;CON__ENSEMBL:ENSBTAP00000032840	P04114	Apolipoprotein B-100;Apolipoprotein B-48	APOB	169	Color2 [DarkGray]	1	4					+	240	240	240	551	551	551	5156	0	32331	7826800000000000	250	5406	5.97753	0	1.91533	1.89767	1.97665	1.56033	1.54424	1.65323	1.59185	1.97426	1.98626	2.00254	1.88767	1.92542	1.90745	2.12243	2.10201	2.16622	1.66508	1.69292	1.63779	1.55284
+	4.92541	0.579055	A0A3B3ISJ1;A0A0S2Z4L3;P07225;G5E9F8;A0A3B3IRK9;A0A3B3IUA6	A0A3B3ISJ1;A0A0S2Z4L3;P07225;G5E9F8;A0A3B3IRK9	Vitamin K-dependent protein S	PROS1	49	Color2 [DarkGray]	1	4					+	17	17	17	252	252	252	73757	0	29143	8956900000	30	190	4.37064	0	-0.0560054	-0.0459701	-0.284871	0.210059	0.281683	0.226122	0.38868	-0.330543	-0.506172	-0.609641	0.25046	-0.00559609	-0.0261752	-1.34617	-0.92486	-0.879639	0.352196	0.389925	0.410045	0.373424
+	4.80035	0.491209	O14791;B1AH96	O14791	Apolipoprotein L1	APOL1	121	Color2 [DarkGray]	1	4					+	10	10	10	241	241	241	43974	0	11428	10381000000	19	217	3.61547	0	0.238154	0.24637	-0.00809899	1.05003	0.939158	1.14034	0.796223	-0.0301812	-0.495925	-0.355397	0.558306	0.337222	0.292761	-0.491357	0.060474	-0.417287	0.630727	0.389732	0.573278	0.454839
+	4.27031	0.622783	P02787;H7C5E8;F8WEK9;F8WCI6;C9JB55;C9JVG0;F8WC57	P02787	Serotransferrin	TF	164	Color2 [DarkGray]	1	4					+	32	32	32	467	467	467	77063	0	32331	17328000000	40	372	7.27024	0	-1.05295	-0.962821	-1.39209	-0.254721	-0.490162	-0.213438	-0.167961	0.394452	0.15958	0.18027	0.389686	0.158552	0.178641	0.239881	0.27099	0.161579	0.357058	0.312457	0.318165	0.755565
+	4.06232	0.724828	P02763	P02763	Alpha-1-acid glycoprotein 1	ORM1	162	Color2 [DarkGray]	1	4					+	3	3	3	119	119	119	23511	0	24023	255280000	10	8	5.72148	0	-1.84147	-1.50017	-1.66994	-1.68354	-2.15475	-1.5924	-2.07121	-0.8735	-1.72149	-1.17028	-1.14228	-1.0894	-1.15268	-1.32695	-1.2547	-1.17432	-1.23828	-1.10071	-1.01594	-1.25347
+	3.84915	-0.995493	P02776;P10720	P02776;P10720	Platelet factor 4;Platelet factor 4, short form;Platelet factor 4 variant;Platelet factor 4 variant(4-74);Platelet factor 4 variant(5-74);Platelet factor 4 variant(6-74)	PF4;PF4V1	163	Color2 [DarkGray]	1	4					+	4	4	4	356	356	356	10845	0	66214	900980000	4	34	3.09024	0.000307692	-0.471721	-0.369179	-0.362686	-2.29262	-2.08365	-1.22434	-1.72285	0.101746	-0.136988	-0.25635	-0.528409	-0.634241	-1.00804	-0.846833	-0.58564	-0.764012	-1.91318	-1.36048	-1.05509	-1.6131
+	3.84842	-0.305576	P01871	P01871	Ig mu chain C region	IGHM	150	Color2 [DarkGray]	1	4					+	31	31	31	653	653	653	49439	0	32331	6628800000000000	25	1494	7.19214	0	2.59486	2.60749	2.71244	2.25352	2.244	2.31051	2.26262	2.478	2.47819	2.56691	2.49771	2.48548	2.42608	2.34546	2.35152	2.42332	2.09651	2.10472	1.99175	1.85295
+	3.6106	-1.76262	P55056	P55056	Apolipoprotein C-IV	APOC4	213	Color2 [DarkGray]	1	4					+	5	3	3	244	157	157	14553	0	31613	4882400000	6	70	1.84035	0.00311111	0.275839	-1.16844	0.218922	-2.12981	-2.30234	-1.8358	-2.12665	-0.426375	-0.342327	-0.393775	-1.63411	-1.61961	-1.30115	-0.41132	-0.109682	-0.121312	-0.988998	-0.910433	-0.879913	-1.61867
+	3.59818	-0.341859	P01834;A0A5H1ZRQ3	P01834;A0A5H1ZRQ3	Ig kappa chain C region	IGKC	149	Color2 [DarkGray]	1	4					+	8	8	8	822	822	822	11765	0	32331	98209000000	5	408	4.1551	0	1.81488	1.85587	1.73767	1.64182	1.44665	1.58733	1.6321	1.51198	1.55189	1.57725	1.71621	1.64249	1.57087	1.50366	1.30812	1.4209	1.4357	1.41043	1.36517	1.12711
+	3.55527	0.49051	O95445	O95445	Apolipoprotein M	APOM	125	Color2 [DarkGray]	1	4					+	8	8	1	383	383	53	21253	0	68406	41672000000	10	274	12.3523	0	0.24709	-0.0407666	0.24218	-0.0887486	0.18477	-0.0737901	0.361625	2.09462	2.15639	2.14708	1.85647	1.30207	1.25468	2.24718	2.10966	2.33743	0.802951	1.19623	1.19023	0.912241
+	3.35918	-0.574879	P08670;B0YJC4;B0YJC5;A0A1B0GTT5;A0A1B0GVG8;P17661	P08670;B0YJC4;B0YJC5	Vimentin	VIM	187	Color2 [DarkGray]	1	4					+	13	13	12	376	376	356	53651	0	98837	964940000	32	60	3.93267	0	-0.695503	-0.618653	-0.563718	-1.81655	-1.59485	-2.00822	-2.40323	-1.03783	-0.28366	-0.407822	-0.986248	-1.08106	-1.06298	-0.167816	-0.913137	-0.455846	-1.72901	-1.86533	-1.80443	-2.37755
+	3.26498	-0.960724	P68371;Q3ZCM7;M0R2D3;M0R042;M0QYM7;M0R2T4;A0A075B724	P68371	Tubulin beta-4B chain	TUBB4B	224	Color2 [DarkGray]	1	4					+	17	17	1	53	53	27	4983	0	32331	2917800000	19	121	4.42231	0	-0.00275687	-0.102173	0.111687	-1.22974	-1.11634	-1.06526	-1.34787	-0.046009	0.42626	0.422449	-0.827693	-0.646291	-0.371202	0.735208	0.0570521	0.616811	-1.23191	-1.89115	-1.14493	-1.25845
+	3.2212	-0.331643	P02656;B0YIW2;C9J2Q0	P02656;B0YIW2	Apolipoprotein C-III	APOC3	77	Color2 [DarkGray]	1	4					+	6	6	6	576	576	576	10852	0	25138	1755500000000000	6	352	1.85838	0.00296629	2.19806	2.45383	2.52204	1.25912	1.54157	1.42268	1.37277	2.34008	2.37393	2.49082	1.88867	2.03472	2.04086	2.41868	2.20758	2.43577	1.89599	1.84755	1.82916	1.66652
+	3.2196	-0.63263	K7ER74;P02655;Q6P163;V9GYJ8;K7EMC3	K7ER74;P02655	Apolipoprotein C-II;Proapolipoprotein C-II	APOC4-APOC2;APOC2	120	Color2 [DarkGray]	1	4					+	9	9	7	399	399	337	20049	0	32331	4092500000000000	6	584	3.2325	0.000196721	2.48001	2.53704	2.45372	1.90465	1.67947	2.07632	1.56933	2.3729	2.3729	2.49141	2.16202	2.10319	2.10943	2.49417	2.42256	2.5739	1.99371	2.03662	1.85298	1.39396
+	3.20065	0.255567	A0A140TA44;A0A140TA49;A0A140TA32;F5GXS0;A0A0G2JL54;A0A0G2JPR0;P0C0L4;P0C0L5;A0A140TA29;A0A3B3ISA6;CON__P01030;CON__ENSEMBL:ENSBTAP00000007350;A0A3B3ISD7	A0A140TA44;A0A140TA49;A0A140TA32;F5GXS0;A0A0G2JL54;A0A0G2JPR0;P0C0L4;P0C0L5;A0A140TA29;A0A3B3ISA6	Complement C4-A;Complement C4 beta chain;Complement C4-A alpha chain;C4a anaphylatoxin;C4b-A;C4d-A;Complement C4 gamma chain;Complement C4-B;Complement C4 beta chain;Complement C4-B alpha chain;C4a anaphylatoxin;C4b-B;C4d-B;Complement C4 gamma chain	C4B;C4A	51	Color2 [DarkGray]	1	4					+	32	32	32	235	235	235	18766	0	32331	15359000000	77	279	6.88081	0	0.348043	0.552915	0.357599	0.339427	0.427608	0.290881	0.565973	0.797896	0.743306	0.711947	0.820352	0.7108	0.822322	0.733338	0.750913	0.694228	0.526044	0.527226	0.67784	0.604761
+	3.09981	-0.673862	Q9BWP8	Q9BWP8	Collectin-11	COLEC11	239	Color2 [DarkGray]	1	4					+	3	3	3	92	92	92	28665	0	31152	230140000	11	15	3.44891	0.000140351	-1.44027	-1.77823	-1.65116	-1.78189	-1.66092	-1.35389	-1.94806	-1.51612	-1.89325	-1.44655	-0.986036	-1.238	-1.32311	-1.54104	-2.00359	-1.86985	-1.85033	-2.15641	-2.45744	-1.78021
+	3.06046	-0.372949	A0A096LPE2;P35542	A0A096LPE2;P35542	Serum amyloid A-4 protein	SAA2-SAA4;SAA4	16	Color2 [DarkGray]	1	4					+	5	5	5	255	255	255	23353	0	4556	37791000000	12	225	7.53377	0	1.15066	0.818053	1.1161	0.377311	0.816433	0.618103	0.814129	0.958662	0.671645	0.780495	0.558595	1.10033	1.02154	0.882035	0.98276	0.930924	1.31244	1.26213	1.18738	1.04717
+	2.98866	-0.312802	P07996;CON__Q28194;A8MZG1;A0A7I2YQ86;A0A7I2V585;A0A7I2YQT6;A0A3B3ITK0;P35442	P07996;CON__Q28194	Thrombospondin-1	THBS1	183	Color2 [DarkGray]	1	4					+	7	7	7	66	66	66	12938	0	52924	1609800000	61	53	2.01189	0.00237209	-0.746644	-0.763066	-0.81476	-0.864182	-0.3949	-0.35597	-0.35092	-0.929395	-1.18585	-1.09011	-0.546047	-0.574388	-0.619295	-0.932084	-0.912606	-1.02413	-0.973249	-1.0068	-1.03096	-1.04297
+	2.88399	-0.758554	P68363	P68363	Tubulin alpha-1B chain	TUBA1B	222	Color2 [DarkGray]	1	4					+	12	12	0	355	355	0	50151	0	15637	2780900000	21	76	4.64874	0	-0.121014	-0.142283	-0.116842	-1.24434	-0.959392	-0.969654	-0.973345	-0.289738	0.557719	0.515362	-0.724509	-0.604123	-0.753511	0.671906	-0.0706059	0.491009	-1.51612	-1.14927	-1.19915	-1.94211
+	2.8506	-1.57243	A0A075B6K4;P01715	A0A075B6K4		IGLV3-10	2	Color2 [DarkGray]	1	4					+	3	3	2	165	165	165	12441	0	1809	1147900000	4	29	2.62089	0.000540541	-0.724587	-1.67415	0.240456	-0.626089	-1.42234	-0.820275	-2.06341	-0.849136	-0.54161	-0.690403	-1.8184	-1.46013	-1.844	-1.04425	-0.848985	-0.847043	-1.7144	-2.24284	-2.04872	-1.42854
+	2.82229	-1.88741	P01780;A0A0B4J1V1;P01763;P01762;A0A075B7F0;P01766	P01780;A0A0B4J1V1;P01763;P01762	Ig heavy chain V-III region JON;Ig heavy chain V-III region WEA;Ig heavy chain V-III region TRO	IGHV3-21	147	Color2 [DarkGray]	1	4					+	3	2	1	265	171	77	12943	0	1285	4962600000	5	35	1.78221	0.00365591	-1.57821	0.802933	0.819112	-1.51306	-1.82927	0.143376	-0.154395	-2.03538	-0.147324	0.484231	0.538953	-1.34824	0.583722	0.259109	0.254813	0.138113	-1.64447	-1.62461	-1.37261	-1.66633
+	2.78772	0.394115	P02671;A0A087WUA0	P02671	Fibrinogen alpha chain;Fibrinopeptide A;Fibrinogen alpha chain	FGA	155	Color2 [DarkGray]	1	4					+	21	21	21	311	311	311	94972	0	23599	8528000000	35	172	3.37768	0.000135593	-0.136785	-0.234089	-0.247106	0.216978	0.368091	0.368055	0.182338	0.0741601	-0.0887185	-0.0896434	-0.0664589	0.413908	0.386966	-0.0576874	0.17202	0.0782862	0.196892	0.109567	0.0314943	-0.247825
+	2.48333	-1.07008	A0A0B4J1U7	A0A0B4J1U7		IGHV6-1	26	Color2 [DarkGray]	1	4					+	2	2	2	132	132	132	13481	0	13292	1553400000	4	36	1.25907	0.0146392	0.111772	0.00912488	0.124342	-2.07621	-2.03633	-1.83099	-1.63468	-0.110742	-0.548138	-0.543354	-0.0440345	-0.0211255	-0.0427132	-1.79349	-0.396776	-0.752201	-1.56112	-1.17452	-1.98627	-1.60343
+	2.32128	-0.503804	P62805	P62805	Histone H4	HIST1H4A	219	Color2 [DarkGray]	1	4					+	5	5	5	505	505	505	11367	0	34339	1132400000	6	53	4.15651	0	-0.439828	-0.663482	-0.628851	-1.39427	-1.15932	-1.15238	-0.912978	-0.719495	-0.432621	-0.492381	-0.87661	-0.760862	-0.835502	-0.220443	-0.583611	-0.258412	-1.04576	-1.00242	-1.23288	-1.89678
+	2.28882	-0.406946	A0A3B3ISR2;B4DPQ0;P00736;F5H2D0;A0A3B3ITU4;F5H1V0;F5H6Y3;F5H3N3;H0YFL7;Q9NZP8	A0A3B3ISR2;B4DPQ0;P00736;F5H2D0;A0A3B3ITU4	Complement C1r subcomponent;Complement C1r subcomponent heavy chain;Complement C1r subcomponent light chain	C1R	59	Color2 [DarkGray]	1	4					+	18	18	18	298	298	298	80173	0	15414	3785700000	34	63	3.12516	0.00025	0.32985	0.549013	0.3893	-0.655471	-0.0222976	0.406904	0.208742	0.262096	0.027244	0.284997	0.267803	0.0516756	0.000719161	-0.339605	-0.101529	-0.0485561	-0.676719	-0.737242	-0.513135	-0.113118
+	2.27997	-0.455756	A0A5F9ZHM4;P07195;F5H5G7;F5H155;A8MW50;A0A087WUM2;G3XAP5;A0A3B3IS95;F5H245;Q6ZMR3;P07864;P00338	A0A5F9ZHM4;P07195;F5H5G7;F5H155;A8MW50;A0A087WUM2;G3XAP5;A0A3B3IS95;F5H245;Q6ZMR3;P07864;P00338	L-lactate dehydrogenase B chain;L-lactate dehydrogenase;L-lactate dehydrogenase A-like 6A;L-lactate dehydrogenase C chain;L-lactate dehydrogenase A chain	LDHB;LDHC;LDHAL6A;LDHA	64	Color2 [DarkGray]	1	4					+	2	2	2	62	62	62	37294	0	13141	215320000	17	4	2.27748	0.00123077	-1.17106	-1.0384	-1.2081	-1.23745	-2.14464	-1.31426	-1.33666	-1.31325	-1.26772	-1.02548	-1.30033	-1.21113	-1.28512	-1.24908	-1.3263	-1.30254	-1.48427	-2.02805	-1.76017	-1.47312
+	2.24297	0.371251	P01023;P20742;H0YFH1;F8W7L3;CON__ENSEMBL:ENSBTAP00000024146	P01023	Alpha-2-macroglobulin	A2M	132	Color2 [DarkGray]	1	4					+	42	42	42	35	35	35	16329	0	32331	20075000000	69	385	7.4422	0	-0.031193	0.00514143	-0.0153363	0.320602	0.31675	0.313446	0.216521	0.613061	0.492981	0.551693	0.625038	0.554739	0.551925	0.592642	0.653695	0.616394	0.11763	0.138224	0.11181	0.520052
+	2.11416	-0.880797	P60201;B1B1G3;B1B1G4;B1B1G6;B1B1G1;B1B1G2	P60201	Myelin proteolipid protein	PLP1	214	Color2 [DarkGray]	1	4					+	6	6	6	238	238	238	30077	0	71937	2463500000	10	60	3.033	0.000363636	0.169571	0.0367834	0.15618	-1.89775	-1.77467	-1.13147	-1.86544	-0.210651	0.256354	0.251506	-0.401328	-0.340219	-0.226175	0.433539	-0.1051	0.329337	-0.578989	-0.642141	-1.84932	-1.72883
+	2.01978	-0.568611	P09543;K7ERC4	P09543	2,3-cyclic-nucleotide 3-phosphodiesterase	CNP	189	Color2 [DarkGray]	1	4					+	3	3	3	88	88	88	47578	0	2505	205060000	28	10	1.88513	0.00295455	-1.17558	-0.986309	-1.11992	-1.90228	-1.91707	-1.9861	-2.20913	-1.38231	-0.955861	-1.35281	-1.28896	-1.28979	-1.14811	-1.26958	-1.05312	-1.38507	-1.24708	-1.78844	-2.51837	-1.45019
+	1.96974	0.781274	A0A0C4DH38;A0A0J9YXX1	A0A0C4DH38;A0A0J9YXX1		IGHV5-51	41	Color2 [DarkGray]	1	4					+	3	3	3	342	342	342	12674	0	25763	1310800000	6	28	0.8427	0.0451171	-0.112061	-0.0522377	-0.176686	-1.629	-1.80904	-1.73695	-2.12604	-1.8603	-0.92455	-1.00874	-0.305108	-0.258548	-0.408863	-1.16784	-0.717316	-1.20046	-0.452598	-0.46032	-0.467506	-1.03713
+	1.96145	-0.346512	A0A286YEY1;P01876	A0A286YEY1;P01876	Ig alpha-1 chain C region	IGHA1	56	Color2 [DarkGray]	1	4					+	11	11	4	407	407	148	42848	0	11334	18890000000	14	76	4.00659	0	0.979475	0.98026	1.04404	0.452107	0.847557	0.959074	0.559641	0.835461	0.896609	0.968878	0.923993	1.19231	0.970281	0.852812	0.822816	0.998596	0.588277	0.648307	0.570059	0.196073
+	1.95957	-1.29601	P01624;A0A0C4DH90;A0A075B6H7;A0A0C4DH55	P01624;A0A0C4DH90;A0A075B6H7;A0A0C4DH55	Ig kappa chain V-III region POM	IGKV3OR2-268;IGKV3-7;IGKV3D-7	141	Color2 [DarkGray]	1	4					+	2	2	1	261	261	78	12496	0	1348	1866500000	3	19	2.85255	0.000405797	-1.75415	-2.0241	-1.87888	-2.1173	-1.55434	-1.78666	-1.96283	-2.01757	-1.82627	-2.20088	0.0465554	0.137752	0.136477	-0.195759	0.0637488	-0.0996626	-1.65713	-1.70587	-2.24523	-2.0616
+	1.87011	-1.44917	P00739;A0A0A0MRD9	P00739;A0A0A0MRD9	Haptoglobin-related protein	HPR	127	Color2 [DarkGray]	1	4					+	17	5	5	445	213	213	39029	0	35814	4911300000	20	37	2.09675	0.00204878	0.841619	0.768898	0.82504	-1.50223	-0.031012	-0.125833	-0.151629	0.638974	0.426167	0.425494	-0.127305	0.550467	0.532877	0.299861	0.352947	0.180126	0.479589	0.379001	-1.7366	-1.94288
+	1.86672	-0.451433	P62873;C9JIS1;A0A7I2S2S9;A0A6Q8PFV8;A0A6Q8PFE0;A0A6Q8PG88;E7EP32;B1AKQ8;C9JXA5;A0A6Q8PFW8;H7C5J5;F6UT28;F6X3N5;C9JZN1;P62879;Q9HAV0;B3KVK2;F5H100;F5H8J8;F5H0S8;P16520;E9PCP0;C9JD14	P62873;C9JIS1;A0A7I2S2S9;A0A6Q8PFV8;A0A6Q8PFE0;A0A6Q8PG88;E7EP32;B1AKQ8;C9JXA5;A0A6Q8PFW8;H7C5J5;F6UT28;F6X3N5;C9JZN1;P62879;Q9HAV0	Guanine nucleotide-binding protein G(I)/G(S)/G(T) subunit beta-1;Guanine nucleotide-binding protein G(I)/G(S)/G(T) subunit beta-2;Guanine nucleotide-binding protein subunit beta-4	GNB1;GNB2;GNB4	220	Color2 [DarkGray]	1	4					+	3	3	3	97	97	97	37377	0	18687	130170000	13	12	2.79986	0.000450704	-1.17002	-1.06925	-1.1578	-1.79143	-1.30328	-1.2335	-1.278	-1.80744	-1.30629	-1.30469	-1.49652	-1.73478	-1.00285	-1.22454	-1.79018	-1.89727	-1.60897	-2.16874	-1.92162	-1.82798
+	1.72426	0.601944	P01709;P01706	P01709;P01706	Ig lambda chain V-II region MGC;Ig lambda chain V-II region BOH		144	Color2 [DarkGray]	1	4					+	2	2	2	11	11	11	12382	0	25105	801060000	2	11	6.27223	0	-0.70896	-0.645691	-0.732526	0.850479	-0.196598	-0.110607	-0.250229	-1.56812	-2.02691	-1.31621	-1.00975	-2.05078	-2.16984	-1.60899	-1.34516	-2.19613	-0.767905	-0.804045	-0.760005	-1.44696
+	1.45792	-0.577143	M0R116;A0A2R8YEY8;A0A0A0MT26;P13637;B1AKY9;P50993;P05023;H0Y7C1;M0QXF2;Q13733;P54707;P20648;Q5TC05;A0A669K9X0;E9PRA5	M0R116;A0A2R8YEY8;A0A0A0MT26;P13637;B1AKY9;P50993;P05023;H0Y7C1	Sodium/potassium-transporting ATPase subunit alpha-3;Sodium/potassium-transporting ATPase subunit alpha-2;Sodium/potassium-transporting ATPase subunit alpha-1	ATP1A3;ATP1A2;ATP1A1	25	Color2 [DarkGray]	1	4					+	12	12	12	151	151	151	10828	0	81124	1909600000	43	92	3.48292	0.000142857	-0.203685	-0.129266	-0.208455	-0.672092	-0.711038	-0.473419	-0.801214	-0.275719	-0.0865278	-0.176361	-0.472153	-0.375033	-0.39913	0.0731331	-0.396032	-0.0794232	-0.661547	-0.501838	-0.698374	-1.83801
+	1.45694	0.623725	E7ETN3;B4E1Z4;P00751;H7C5H1;A0A0G2JH38;H7C526	E7ETN3;B4E1Z4;P00751;H7C5H1	Complement factor B;Complement factor B Ba fragment;Complement factor B Bb fragment	CFB	78	Color2 [DarkGray]	1	4					+	11	11	11	103	103	103	12402	0	74509	1003100000	58	41	3.81057	0	-1.89012	-1.82646	-1.69672	-1.24108	-1.65778	-0.997098	-0.830925	-0.897131	-1.04912	-0.9478	-0.564594	-0.647645	-0.707148	-0.974041	-0.617792	-0.903496	-1.23595	-1.55329	-1.30013	-0.897536
+	1.06855	-0.798096	A0A0C4DH68;A0A075B6R9	A0A0C4DH68;A0A075B6R9		IGKV2-24;IGKV2D-24	4	Color2 [DarkGray]	1	4					+	2	2	1	167	167	108	13079	0	176	3900600000	4	30	0.87569	0.0405091	0.394169	0.538019	0.358167	-1.43283	0.437555	0.457939	0.483445	0.293136	-0.157717	-0.19802	0.525171	0.393972	0.412629	-0.362792	-0.0234975	-0.218847	0.179024	0.220464	-2.11281	0.072495
+	1.00903	1.16808	P01619	P01619	Ig kappa chain V-III region B6		140	Color2 [DarkGray]	1	4					+	3	3	2	405	405	267	12557	0	36767	5446600000	5	31	1.04596	0.0244112	-1.75263	-1.84884	-1.29254	-1.97244	0.430131	0.571973	0.414717	0.918817	0.742802	0.78533	-1.68036	-1.6654	0.676008	0.616945	0.645919	0.439157	0.41506	0.480725	0.430074	-2.2279
[truncated: 14 more columns]

## Sheet: MLPH - 5SX
Significant	-log(P - value)	Difference	Protein IDs	Majority protein IDs	Protein names	Gene names	id	Symbol color	Symbol type	Symbol size	Show label	Only identified by site	Reverse	Potential contaminant	ANOVA Significant	Peptides	Razor + unique peptides	Unique peptides	Sequence coverage [%]	Unique + razor sequence coverage [%]	Unique sequence coverage [%]	Mol. weight [kDa]	Q-value	Score	Intensity	iBAQ peptides	MS/MS count	#NAME?	ANOVA q-value	LFQ intensity 01	LFQ intensity 01_211116203409	LFQ intensity 01_211116221134	LFQ intensity 02	LFQ intensity 02_211117012617	LFQ intensity 02_211117030340	LFQ intensity 02_211117044104	LFQ intensity 03	LFQ intensity 03_211117075550	LFQ intensity 03_211117093314	LFQ intensity 04	LFQ intensity 04_211117124800	LFQ intensity 04_211117142524	LFQ intensity 05	LFQ intensity 05_211117174036	LFQ intensity 05_211117191758	LFQ intensity 18	LFQ intensity 18_211120085806	LFQ intensity 18_211120103530	LFQ intensity 19
+	6.07548	0.482132	C9JF17;P05090;C9JX71;F8WBT9	C9JF17;P05090	Apolipoprotein D	APOD	83	Color2 [DarkGray]	1	4					+	7	7	7	265	265	265	24158	0	18923	32981000000	11	237	13.4361	0	0.435938	0.483329	0.390839	0.64187	0.685716	0.640997	0.542487	0.211444	-0.0166452	0.00212351	0.465874	0.452863	0.407067	0.107279	0.48225	0.19458	1.33276	1.26521	1.2439	1.2855
+	5.90708	0.714273	P20851;Q5VVQ7	P20851	C4b-binding protein beta chain	C4BPB	204	Color2 [DarkGray]	1	4					+	6	6	6	274	274	274	28357	0	75595	18079000000	14	99	4.2278	0	0.41269	0.535469	0.37981	0.921902	1.09089	0.874565	1.05586	0.186785	-0.153016	-0.0769958	0.82185	0.647708	0.687897	-0.588485	-0.059608	-0.358268	1.00237	0.927283	0.822711	1.03862
+	5.66759	0.827048	A0A3B3ISJ1;A0A0S2Z4L3;P07225;G5E9F8;A0A3B3IRK9;A0A3B3IUA6	A0A3B3ISJ1;A0A0S2Z4L3;P07225;G5E9F8;A0A3B3IRK9	Vitamin K-dependent protein S	PROS1	49	Color2 [DarkGray]	1	4					+	17	17	17	252	252	252	73757	0	29143	8956900000	30	190	4.37064	0	-0.0560054	-0.0459701	-0.284871	0.210059	0.281683	0.226122	0.38868	-0.330543	-0.506172	-0.609641	0.25046	-0.00559609	-0.0261752	-1.34617	-0.92486	-0.879639	0.352196	0.389925	0.410045	0.373424
+	4.28508	-0.262974	P04114;A8MUN2;A0A669KB70;CON__ENSEMBL:ENSBTAP00000032840	P04114	Apolipoprotein B-100;Apolipoprotein B-48	APOB	169	Color2 [DarkGray]	1	4					+	240	240	240	551	551	551	5156	0	32331	7826800000000000	250	5406	5.97753	0	1.91533	1.89767	1.97665	1.56033	1.54424	1.65323	1.59185	1.97426	1.98626	2.00254	1.88767	1.92542	1.90745	2.12243	2.10201	2.16622	1.66508	1.69292	1.63779	1.55284
+	4.06085	0.505652	O14791;B1AH96	O14791	Apolipoprotein L1	APOL1	121	Color2 [DarkGray]	1	4					+	10	10	10	241	241	241	43974	0	11428	10381000000	19	217	3.61547	0	0.238154	0.24637	-0.00809899	1.05003	0.939158	1.14034	0.796223	-0.0301812	-0.495925	-0.355397	0.558306	0.337222	0.292761	-0.491357	0.060474	-0.417287	0.630727	0.389732	0.573278	0.454839
+	4.02153	-0.44105	A0A024R6I7;P01009;A0A0G2JRN3;G3V2B9;G3V5R8;G3V387;A0A0B4J278;G3V544	A0A024R6I7;P01009;A0A0G2JRN3	Alpha-1-antitrypsin;Short peptide from AAT	SERPINA1	0	Color2 [DarkGray]	1	4					+	19	19	19	428	428	428	46708	0	22589	18887000000	23	203	11.2343	0	-0.103985	0.120362	0.169686	0.217557	0.533791	0.180969	0.461165	1.07483	0.993909	1.02156	0.898603	0.671442	0.933388	1.07413	1.07671	1.04522	0.101369	0.1809	0.384326	0.0679249
+	3.37796	-0.852114	P02776;P10720	P02776;P10720	Platelet factor 4;Platelet factor 4, short form;Platelet factor 4 variant;Platelet factor 4 variant(4-74);Platelet factor 4 variant(5-74);Platelet factor 4 variant(6-74)	PF4;PF4V1	163	Color2 [DarkGray]	1	4					+	4	4	4	356	356	356	10845	0	66214	900980000	4	34	3.09024	0.000307692	-0.471721	-0.369179	-0.362686	-2.29262	-2.08365	-1.22434	-1.72285	0.101746	-0.136988	-0.25635	-0.528409	-0.634241	-1.00804	-0.846833	-0.58564	-0.764012	-1.91318	-1.36048	-1.05509	-1.6131
+	3.33348	-0.512082	P02654;K7ERI9;K7EJI9;K7ELM9;K7EPF9;K7EKP1	P02654;K7ERI9;K7EJI9;K7ELM9;K7EPF9	Apolipoprotein C-I;Truncated apolipoprotein C-I	APOC1	154	Color2 [DarkGray]	1	4					+	9	9	9	542	542	542	93318	0	82991	1669900000000000	3	759	10.1776	0	1.54097	1.558	1.77147	1.11838	0.951343	1.05424	1.20891	1.19002	1.11044	1.02745	1.29394	1.28995	1.11645	0.969122	1.18967	1.13223	1.58082	1.54735	1.48085	1.13687
+	3.20044	-0.642232	Q9BWP8	Q9BWP8	Collectin-11	COLEC11	239	Color2 [DarkGray]	1	4					+	3	3	3	92	92	92	28665	0	31152	230140000	11	15	3.44891	0.000140351	-1.44027	-1.77823	-1.65116	-1.78189	-1.66092	-1.35389	-1.94806	-1.51612	-1.89325	-1.44655	-0.986036	-1.238	-1.32311	-1.54104	-2.00359	-1.86985	-1.85033	-2.15641	-2.45744	-1.78021
+	3.19616	-0.562495	P01024;M0QYC8;M0QXZ3;M0R0Q9;M0R1Q1;O95568	P01024	Complement C3;Complement C3 beta chain;C3-beta-c;Complement C3 alpha chain;C3a anaphylatoxin;Acylation stimulating protein;Complement C3b alpha chain;Complement C3c alpha chain fragment 1;Complement C3dg fragment;Complement C3g fragment;Complement C3d fragment;Complement C3f fragment;Complement C3c alpha chain fragment 2	C3	133	Color2 [DarkGray]	1	4					+	78	78	69	509	509	469	18715	0	32331	45744000000	95	923	8.49626	0	-0.348543	-0.29215	-0.435359	0.214505	0.212642	0.193215	-0.224306	0.637418	0.560077	0.551947	0.487522	0.60288	0.616759	0.711031	0.803703	0.78463	-0.176764	-0.224211	-0.225939	-0.135299
+	3.13572	0.428679	P04003;A6PVY5;F2Z2V7	P04003	C4b-binding protein alpha chain	C4BPA	167	Color2 [DarkGray]	1	4					+	25	25	25	561	561	561	67033	0	29558	69998000000	30	450	3.4366	0.000137931	1.11414	1.2169	1.41155	0.319451	0.49214	0.620661	0.601407	1.18526	1.25827	1.30728	1.10398	1.53444	1.19697	1.10569	0.81278	0.952912	1.58241	1.61122	1.53835	1.53757
+	3.12991	-0.394792	P02656;B0YIW2;C9J2Q0	P02656;B0YIW2	Apolipoprotein C-III	APOC3	77	Color2 [DarkGray]	1	4					+	6	6	6	576	576	576	10852	0	25138	1755500000000000	6	352	1.85838	0.00296629	2.19806	2.45383	2.52204	1.25912	1.54157	1.42268	1.37277	2.34008	2.37393	2.49082	1.88867	2.03472	2.04086	2.41868	2.20758	2.43577	1.89599	1.84755	1.82916	1.66652
+	3.02458	-0.500944	P01857;A0A0A0MS08;A0A0A0MS07	P01857;A0A0A0MS08;A0A0A0MS07	Ig gamma-1 chain C region	IGHG1	20	Color2 [DarkGray]	1	4					+	12	12	6	479	479	279	36105	0	19422	25972000000	15	178	9.60442	0	0.216755	0.231678	0.197263	-0.417059	0.120765	0.207712	0.202882	1.35846	1.25414	1.23377	0.770558	0.796526	0.956958	1.30004	1.33875	1.31519	0.289278	0.378311	0.358192	0.519167
+	2.73113	-1.49203	P01624;A0A0C4DH90;A0A075B6H7;A0A0C4DH55	P01624;A0A0C4DH90;A0A075B6H7;A0A0C4DH55	Ig kappa chain V-III region POM	IGKV3OR2-268;IGKV3-7;IGKV3D-7	141	Color2 [DarkGray]	1	4					+	2	2	1	261	261	78	12496	0	1348	1866500000	3	19	2.85255	0.000405797	-1.75415	-2.0241	-1.87888	-2.1173	-1.55434	-1.78666	-1.96283	-2.01757	-1.82627	-2.20088	0.0465554	0.137752	0.136477	-0.195759	0.0637488	-0.0996626	-1.65713	-1.70587	-2.24523	-2.0616
+	2.68943	-0.57014	K7ER74;P02655;Q6P163;V9GYJ8;K7EMC3	K7ER74;P02655	Apolipoprotein C-II;Proapolipoprotein C-II	APOC4-APOC2;APOC2	120	Color2 [DarkGray]	1	4					+	9	9	7	399	399	337	20049	0	32331	4092500000000000	6	584	3.2325	0.000196721	2.48001	2.53704	2.45372	1.90465	1.67947	2.07632	1.56933	2.3729	2.3729	2.49141	2.16202	2.10319	2.10943	2.49417	2.42256	2.5739	1.99371	2.03662	1.85298	1.39396
+	2.65285	-0.976655	P02747	P02747	Complement C1q subcomponent subunit C	C1QC	158	Color2 [DarkGray]	1	4					+	5	5	5	253	253	253	25773	0	40975	1721200000	13	58	5.21428	0	-0.840655	-0.89626	-0.871731	-1.80339	-1.09961	-1.53453	-1.34486	-0.307663	-0.736068	-0.464091	-0.373802	-0.594558	-0.631248	-0.367238	-0.299934	-0.494965	-1.07367	-0.978144	-1.07125	-1.97768
+	2.58993	0.322786	P02787;H7C5E8;F8WEK9;F8WCI6;C9JB55;C9JVG0;F8WC57	P02787	Serotransferrin	TF	164	Color2 [DarkGray]	1	4					+	32	32	32	467	467	467	77063	0	32331	17328000000	40	372	7.27024	0	-1.05295	-0.962821	-1.39209	-0.254721	-0.490162	-0.213438	-0.167961	0.394452	0.15958	0.18027	0.389686	0.158552	0.178641	0.239881	0.27099	0.161579	0.357058	0.312457	0.318165	0.755565
+	2.58417	-0.452329	P08670;B0YJC4;B0YJC5;A0A1B0GTT5;A0A1B0GVG8;P17661	P08670;B0YJC4;B0YJC5	Vimentin	VIM	187	Color2 [DarkGray]	1	4					+	13	13	12	376	376	356	53651	0	98837	964940000	32	60	3.93267	0	-0.695503	-0.618653	-0.563718	-1.81655	-1.59485	-2.00822	-2.40323	-1.03783	-0.28366	-0.407822	-0.986248	-1.08106	-1.06298	-0.167816	-0.913137	-0.455846	-1.72901	-1.86533	-1.80443	-2.37755
+	2.48357	0.453505	P02763	P02763	Alpha-1-acid glycoprotein 1	ORM1	162	Color2 [DarkGray]	1	4					+	3	3	3	119	119	119	23511	0	24023	255280000	10	8	5.72148	0	-1.84147	-1.50017	-1.66994	-1.68354	-2.15475	-1.5924	-2.07121	-0.8735	-1.72149	-1.17028	-1.14228	-1.0894	-1.15268	-1.32695	-1.2547	-1.17432	-1.23828	-1.10071	-1.01594	-1.25347
+	2.30922	-0.639113	P68363	P68363	Tubulin alpha-1B chain	TUBA1B	222	Color2 [DarkGray]	1	4					+	12	12	0	355	355	0	50151	0	15637	2780900000	21	76	4.64874	0	-0.121014	-0.142283	-0.116842	-1.24434	-0.959392	-0.969654	-0.973345	-0.289738	0.557719	0.515362	-0.724509	-0.604123	-0.753511	0.671906	-0.0706059	0.491009	-1.51612	-1.14927	-1.19915	-1.94211
+	2.16738	-1.77571	P01780;A0A0B4J1V1;P01763;P01762;A0A075B7F0;P01766	P01780;A0A0B4J1V1;P01763;P01762	Ig heavy chain V-III region JON;Ig heavy chain V-III region WEA;Ig heavy chain V-III region TRO	IGHV3-21	147	Color2 [DarkGray]	1	4					+	3	2	1	265	171	77	12943	0	1285	4962600000	5	35	1.78221	0.00365591	-1.57821	0.802933	0.819112	-1.51306	-1.82927	0.143376	-0.154395	-2.03538	-0.147324	0.484231	0.538953	-1.34824	0.583722	0.259109	0.254813	0.138113	-1.64447	-1.62461	-1.37261	-1.66633
+	2.00734	-0.898351	P04406;E7EUT5;O14556	P04406;E7EUT5	Glyceraldehyde-3-phosphate dehydrogenase	GAPDH	175	Color2 [DarkGray]	1	4					+	6	6	6	245	245	245	36053	0	11403	1083100000	17	15	4.14724	0	-0.419594	-0.595774	-0.417675	-2.23343	-1.04119	-0.877746	-1.71703	-0.605619	0.000843281	0.246475	-0.925127	-0.745992	-0.973809	0.16226	-0.665123	-0.00247348	-2.22082	-2.34972	-2.17317	-2.22706
+	1.80053	1.00884	A0A075B6I0	A0A075B6I0		IGLV8-61	1	Color2 [DarkGray]	1	4					+	2	2	2	148	148	148	12814	0	1539	1722300000	4	34	1.1836	0.0180606	0.0171673	-0.0771228	0.0304119	-1.72554	-1.32685	-1.6609	0.255233	-0.362638	-0.541649	-0.645896	-0.143066	-0.133635	-0.24917	-0.829955	-0.71394	-0.886723	-0.338541	-0.29115	-0.325666	-0.771549
+	1.62153	-0.744783	P60201;B1B1G3;B1B1G4;B1B1G6;B1B1G1;B1B1G2	P60201	Myelin proteolipid protein	PLP1	214	Color2 [DarkGray]	1	4					+	6	6	6	238	238	238	30077	0	71937	2463500000	10	60	3.033	0.000363636	0.169571	0.0367834	0.15618	-1.89775	-1.77467	-1.13147	-1.86544	-0.210651	0.256354	0.251506	-0.401328	-0.340219	-0.226175	0.433539	-0.1051	0.329337	-0.578989	-0.642141	-1.84932	-1.72883
+	1.55714	-0.613495	P00747	P00747	Plasminogen;Plasmin heavy chain A;Activation peptide;Angiostatin;Plasmin heavy chain A, short form;Plasmin light chain B	PLG	128	Color2 [DarkGray]	1	4					+	4	4	4	7	7	7	90568	0	25214	383750000	43	13	4.79072	0	-1.75478	-1.82459	-1.65285	-2.07893	-1.50602	-1.07323	-1.93219	-0.89685	-1.00155	-1.14745	-0.62867	-0.7514	-0.721335	-0.992364	-0.63423	-0.996918	-2.12787	-1.0149	-1.06459	-2.16009
[truncated: 14 more columns]
